# Supplementary material for: Genome-wide enhancer RNA profiling adds molecular links between genetic variation and human cancers
Source: Mil Med Res. 2024 Jun 11;11:36. doi: 10.1186/s40779-024-00539-2 (PMC11165858; doi:10.1186/s40779-024-00539-2)
Supplement: Supplementary file 1 — Additional file 1: Table S1 List of eRNAs in 30 cancer types from TCGA. Table S2 Summary of characteristics of individuals in the replication stage. Table S3 Probes or primers sequence used in the study. Table S4 Summary of eRNAQTLs in 30 cancers. Table S5 Enrichment of eRNAQTLs in the histone modification peaks. Table S6 Enrichment of eRNAQTLs in the binding site of transcription factors. Table S7 Enrichment of eRNAQTLs in the binding site of RNA binding proteins. Table S8 Expression patterns of eRNAs in 30 cancers from TCGA. Table S9 Putative target genes of eRNAs in 30 cancers from TCGA. Table S10 Correlations between eRNAs and immune infiltration in 30 cancers from TCGA. Table S11 Correlations between eRNAs and drug response in 30 cancers from TCGA. Table S12 Correlations between eRNAs and patients’ survival in 30 cancers from TCGA. Table S13 Enhancers identified in our colorectal cancer tissues. Table S14 Enhancers identified in our adjacent normal tissues. Table S15 Enhancer RNAs identified in our colorectal cancer tissues. Table S16 Enhancer RNAs identified in our adjacent normal tissues. Table S17 eRNAQTLs identified in our colorectal cancer tissues. Table S18 eRNAQTLs identified in our adjacent normal tissues. Table S19 Tissue specificity of eRNAQTLs identified in our tissues. [file 40779_2024_539_MOESM1_ESM.xlsx]

## Sheet: Table S1
Table S1 List of eRNAs in 30 cancer types from TCGA
Cancer type	eRNA id	Chromosome	Start	End
ACC	ENSR00000250206	1	10451357	10457357
ACC	ENSR00000250693	1	22603693	22609693
ACC	ENSR00000251119	1	33963400	33969400
ACC	1:39612499-39618499	1	40078171	40084171
ACC	1:51006793-51012793	1	51472465	51478465
ACC	1:51007228-51013228	1	51472900	51478900
ACC	ENSR00000006992	1	56952552	56958552
ACC	ENSR00000010575	1	100166956	100172956
ACC	ENSR00000011610	1	114231890	114237890
ACC	ENSR00000012140	1	118378770	118384770
ACC	ENSR00000253851	1	118382622	118388622
ACC	ENSR00000012251	1	119838442	119844442
ACC	ENSR00000014087	1	155537215	155543215
ACC	ENSR00000014617	1	160957126	160963126
ACC	ENSR00000254910	1	160957290	160963290
ACC	ENSR00000017506	1	193227301	193233301
ACC	ENSR00000017507	1	193230749	193236749
ACC	ENSR00000020030	1	215628694	215634694
ACC	ENSR00000020298	1	219598680	219604680
ACC	ENSR00000020299	1	219600934	219606934
ACC	ENSR00000020705	1	223181543	223187543
ACC	ENSR00000025833	10	27246434	27252434
ACC	ENSR00000258722	10	29715729	29721729
ACC	ENSR00000026082	10	29716193	29722193
ACC	ENSR00000027731	10	49209911	49215901
ACC	ENSR00000259488	10	50638546	50644546
ACC	ENSR00000031041	10	88963857	88969857
ACC	ENSR00000031042	10	88968758	88974758
ACC	ENSR00000031043	10	88970957	88976957
ACC	ENSR00000260651	10	88971457	88977457
ACC	ENSR00000031044	10	88973053	88979053
ACC	ENSR00000260944	10	97925456	97931456
ACC	ENSR00000261180	10	104581657	104587657
ACC	ENSR00000032823	10	104666938	104672938
ACC	ENSR00000261220	10	105622358	105628358
ACC	ENSR00000338303	11	123774	131217
ACC	ENSR00000243306	11	125330	136193
ACC	ENSR00000035846	11	1866731	1872731
ACC	ENSR00000262508	11	3492030	3498030
ACC	ENSR00000262509	11	3494630	3500630
ACC	ENSR00000263612	11	36501150	36507150
ACC	ENSR00000263774	11	43879550	43885550
ACC	ENSR00000039212	11	43885284	43891284
ACC	ENSR00000039213	11	43887650	43893650
ACC	ENSR00000263789	11	44271550	44277550
ACC	ENSR00000264041	11	56850275	56856275
ACC	ENSR00000040256	11	61140371	61146371
ACC	ENSR00000041607	11	71451738	71457738
ACC	ENSR00000264768	11	71454646	71460646
ACC	ENSR00000264769	11	71457046	71463046
ACC	ENSR00000043149	11	87834754	87840754
ACC	ENSR00000043150	11	87837088	87843088
ACC	11:110368308-110374308	11	110239033	110245032
ACC	ENSR00000044705	11	110241824	110247824
ACC	ENSR00000044715	11	110339286	110345286
ACC	ENSR00000044716	11	110340772	110346772
ACC	ENSR00000044717	11	110343599	110349599
ACC	ENSR00000265836	11	110346324	110352324
ACC	ENSR00000044718	11	110347345	110353345
ACC	ENSR00000265837	11	110369224	110375224
ACC	ENSR00000046342	11	123289510	123295510
ACC	11:123419853-123425853	11	123290561	123296561
ACC	ENSR00000046354	11	123333606	123339606
ACC	ENSR00000047484	12	79173	85173
ACC	ENSR00000268234	12	48840983	48846983
ACC	ENSR00000053382	12	66394438	66400438
ACC	ENSR00000057216	12	110212564	110218564
ACC	ENSR00000270299	12	114246505	114252505
ACC	ENSR00000062683	13	49467674	49473674
ACC	ENSR00000062684	13	49473062	49479062
ACC	ENSR00000062792	13	50526239	50532239
ACC	13:76589783-76595783	13	77163918	77169918
ACC	ENSR00000272816	13	90345054	90351054
ACC	ENSR00000065683	13	110071754	110077754
ACC	ENSR00000065684	13	110073547	110079547
ACC	ENSR00000273268	13	110073547	110079547
ACC	ENSR00000065685	13	110076655	110082655
ACC	ENSR00000065722	13	110440594	110446594
ACC	ENSR00000065731	13	110519031	110525031
ACC	ENSR00000065732	13	110520494	110526494
ACC	ENSR00000273302	13	111256347	111262347
ACC	ENSR00000066766	14	24050055	24056055
ACC	ENSR00000273758	14	24050509	24056509
ACC	ENSR00000273807	14	24939706	24945706
ACC	ENSR00000067675	14	36280835	36286835
ACC	ENSR00000274092	14	36280906	36286906
ACC	ENSR00000068614	14	54407197	54413197
ACC	ENSR00000072290	14	93157515	93163515
ACC	ENSR00000072291	14	93157981	93163981
ACC	ENSR00000072292	14	93159876	93165876
ACC	ENSR00000073162	14	101093184	101099184
ACC	ENSR00000276104	14	101093937	101099937
ACC	ENSR00000073184	14	101172548	101178548
ACC	ENSR00000276109	14	101173137	101179137
ACC	14:104297554-104303554	14	104763891	104769891
ACC	ENSR00000074383	15	30714403	30720403
ACC	ENSR00000074384	15	30715103	30721103
ACC	ENSR00000074563	15	32756201	32762201
ACC	ENSR00000074564	15	32758401	32764401
ACC	ENSR00000074565	15	32759501	32765501
ACC	ENSR00000075512	15	40687702	40693702
ACC	15:72322062-72328062	15	72614403	72620403
ACC	ENSR00000080396	15	82972454	82978444
ACC	ENSR00000082561	16	2952701	2958701
ACC	ENSR00000279461	16	2954401	2960401
ACC	ENSR00000085004	16	29265842	29271842
ACC	ENSR00000280261	16	29265921	29271921
ACC	ENSR00000085010	16	29293621	29299621
ACC	ENSR00000085043	16	29428327	29434327
ACC	ENSR00000085065	16	29611942	29617942
ACC	ENSR00000085066	16	29614313	29620313
ACC	ENSR00000085229	16	30643021	30649021
ACC	16:69469564-69475564	16	69503467	69509467
ACC	ENSR00000087436	16	69508303	69514303
ACC	ENSR00000088030	16	75623198	75629198
ACC	ENSR00000089476	16	88293406	88299406
ACC	ENSR00000089477	16	88295834	88301834
ACC	ENSR00000091761	17	16287514	16293514
ACC	ENSR00000092461	17	21179112	21185112
ACC	ENSR00000282764	17	21180512	21186512
ACC	ENSR00000092462	17	21180538	21186538
ACC	17:43340887-43346887	17	41418255	41424255
ACC	ENSR00000284627	17	77008182	77014182
ACC	ENSR00000103310	18	47934452	47940452
ACC	ENSR00000103787	18	55207260	55213260
ACC	ENSR00000107894	19	17493909	17499909
ACC	ENSR00000287698	19	17494009	17500009
ACC	ENSR00000288220	19	36060702	36066702
ACC	ENSR00000288221	19	36062202	36068202
ACC	19:36677323-36683323	19	37168225	37174225
ACC	ENSR00000109507	19	40817798	40823798
ACC	ENSR00000288716	19	46905557	46911557
ACC	ENSR00000289039	19	52606353	52612353
ACC	ENSR00000289059	19	53018653	53024653
ACC	ENSR00000111952	2	881330	887330
ACC	ENSR00000111953	2	883796	889796
ACC	ENSR00000111954	2	886198	892198
ACC	ENSR00000113008	2	12161438	12167438
ACC	ENSR00000115040	2	33138492	33144492
ACC	ENSR00000115682	2	39704048	39710048
ACC	ENSR00000115689	2	39719241	39725241
ACC	ENSR00000115690	2	39721744	39727744
ACC	ENSR00000115691	2	39724941	39730941
ACC	2:46627448-46633448	2	46854587	46860587
ACC	ENSR00000119748	2	86723132	86729132
ACC	ENSR00000123167	2	132266319	132272319
ACC	ENSR00000129352	2	207659724	207665724
ACC	ENSR00000130451	2	219622392	219628392
ACC	ENSR00000133396	20	287645	293645
ACC	ENSR00000133397	20	291770	297770
ACC	20:3176120-3182120	20	3156766	3162766
ACC	ENSR00000135812	20	25156736	25162736
ACC	ENSR00000297873	20	25161136	25167136
ACC	ENSR00000297874	20	25164236	25170236
ACC	ENSR00000137722	20	44553107	44559107
ACC	ENSR00000298756	20	46684543	46690543
ACC	ENSR00000299617	21	10489928	10495928
ACC	ENSR00000140270	21	10489964	10495964
ACC	ENSR00000299618	21	10492228	10498228
ACC	ENSR00000140824	21	27601957	27607957
ACC	ENSR00000140825	21	27605820	27611820
ACC	ENSR00000141543	21	34733606	34739606
ACC	ENSR00000142650	21	43375009	43381009
ACC	ENSR00000142710	21	43719410	43725410
ACC	ENSR00000143262	21	46970567	46976567
ACC	ENSR00000144311	22	24250281	24256281
ACC	3:15651471-15657471	3	15692978	15698978
ACC	ENSR00000304519	3	68771451	68777451
ACC	ENSR00000304730	3	75730951	75736951
ACC	ENSR00000155785	3	101406977	101412977
ACC	ENSR00000155786	3	101409632	101415632
ACC	ENSR00000305256	3	101409644	101415644
ACC	ENSR00000155787	3	101411805	101417805
ACC	ENSR00000305257	3	101411844	101417844
ACC	ENSR00000155920	3	104344238	104350238
ACC	ENSR00000305325	3	104344244	104350244
ACC	ENSR00000155921	3	104344744	104350744
ACC	ENSR00000155922	3	104345190	104351190
ACC	ENSR00000305326	3	104347144	104353144
ACC	ENSR00000306266	3	132088244	132094244
ACC	ENSR00000162980	3	184419050	184425050
ACC	ENSR00000163599	3	188652365	188658365
ACC	ENSR00000164707	4	766606	772606
ACC	ENSR00000166287	4	16230823	16236823
ACC	ENSR00000309103	4	17791623	17797623
ACC	ENSR00000167989	4	44982285	44988285
ACC	ENSR00000309925	4	53528967	53534967
ACC	ENSR00000310568	4	77859053	77865053
ACC	ENSR00000169560	4	77861513	77867513
ACC	ENSR00000169561	4	77862060	77868060
ACC	ENSR00000170204	4	85904429	85910429
ACC	ENSR00000310824	4	85906053	85912053
ACC	ENSR00000172481	4	120229179	120235179
ACC	ENSR00000172592	4	121948502	121954502
ACC	ENSR00000172593	4	121949050	121955050
ACC	ENSR00000172804	4	124326761	124332761
ACC	ENSR00000173220	4	129174859	129180859
ACC	ENSR00000173221	4	129178271	129184271
ACC	ENSR00000312036	4	129512055	129518055
ACC	ENSR00000313236	4	177259451	177265451
ACC	ENSR00000313273	4	178580954	178586954
ACC	ENSR00000176606	4	181745753	181751753
ACC	ENSR00000313311	4	181746753	181752753
ACC	ENSR00000176607	4	181746814	181752814
ACC	ENSR00000176829	4	184482198	184488198
ACC	ENSR00000176896	4	185251763	185257763
ACC	ENSR00000313409	4	185253453	185259453
ACC	ENSR00000177339	4	190967860	190973860
ACC	ENSR00000177340	4	190967980	190973980
ACC	ENSR00000313615	4	190969855	190975855
ACC	ENSR00000177388	5	260677	266677
ACC	ENSR00000313719	5	1346415	1352415
ACC	5:1562421-1568421	5	1562536	1568536
ACC	ENSR00000314177	5	21467109	21473109
ACC	5:37099086-37105086	5	37099188	37105188
ACC	5:43048497-43054497	5	43048599	43054599
ACC	ENSR00000316579	5	108746801	108752801
ACC	ENSR00000316580	5	108748101	108754101
ACC	ENSR00000186034	5	122556790	122562790
ACC	ENSR00000186035	5	122559039	122565039
ACC	ENSR00000187428	5	137161086	137167086
ACC	ENSR00000187429	5	137166389	137172389
ACC	5:138939407-138945407	5	138275096	138281096
ACC	ENSR00000189125	5	150873061	150879061
ACC	ENSR00000189126	5	150873661	150879661
ACC	ENSR00000189127	5	150874161	150880161
ACC	ENSR00000189170	5	151106348	151112348
ACC	ENSR00000317983	5	151106461	151112461
ACC	5:154424936-154430936	5	153804496	153810496
ACC	ENSR00000189642	5	157490235	157496235
ACC	ENSR00000190970	5	173095003	173101003
ACC	ENSR00000318631	5	173099403	173105403
ACC	ENSR00000191301	5	176527637	176533637
ACC	ENSR00000319283	6	5075734	5081734
ACC	ENSR00000195227	6	28384991	28390991
ACC	ENSR00000320151	6	29846577	29852577
ACC	ENSR00000320173	6	30241877	30247877
ACC	ENSR00000195608	6	31816411	31822411
ACC	ENSR00000320261	6	31817577	31823577
ACC	ENSR00000320951	6	52687098	52693098
ACC	ENSR00000199718	6	86377018	86383018
ACC	ENSR00000199891	6	90064219	90070219
ACC	ENSR00000199892	6	90067297	90073297
ACC	ENSR00000322121	6	97161276	97167276
ACC	ENSR00000200931	6	109490750	109496750
ACC	ENSR00000322582	6	113488802	113494802
ACC	ENSR00000201430	6	113490802	113496802
ACC	ENSR00000205037	6	149814933	149820933
ACC	ENSR00000205038	6	149817336	149823336
ACC	ENSR00000205309	6	151718848	151724848
ACC	ENSR00000324472	7	1184036	1190036
ACC	ENSR00000211619	7	42920810	42926810
ACC	ENSR00000325922	7	42922999	42928999
ACC	ENSR00000211620	7	42925099	42931099
ACC	ENSR00000211927	7	45288646	45294646
ACC	ENSR00000211928	7	45290152	45296152
ACC	ENSR00000212882	7	65184421	65190421
ACC	ENSR00000326525	7	65184473	65190473
ACC	ENSR00000213403	7	72443311	72449310
ACC	ENSR00000326719	7	72695817	72701802
ACC	ENSR00000213692	7	74288096	74294099
ACC	ENSR00000215380	7	95176612	95182612
ACC	ENSR00000215936	7	100992839	100998839
ACC	ENSR00000216845	7	111992678	111998678
ACC	ENSR00000218550	7	134857999	134863999
ACC	ENSR00000218551	7	134859138	134865138
ACC	ENSR00000218678	7	135927427	135933427
ACC	ENSR00000218789	7	137533340	137539340
ACC	ENSR00000328842	7	143305893	143311893
ACC	ENSR00000328997	7	149235891	149241891
ACC	ENSR00000329454	8	251500	257500
ACC	ENSR00000329966	8	12406909	12412909
ACC	ENSR00000223552	8	37537294	37543294
ACC	ENSR00000225034	8	60878672	60884672
ACC	ENSR00000333094	8	120363440	120369440
ACC	ENSR00000229391	8	120363450	120369450
ACC	ENSR00000230605	8	128909146	128915146
ACC	ENSR00000231899	8	142732884	142738905
ACC	ENSR00000231900	8	142734192	142740212
ACC	ENSR00000333839	8	142734278	142740298
ACC	ENSR00000231901	8	142735037	142741057
ACC	ENSR00000232005	8	144013092	144019092
ACC	ENSR00000333916	8	144014216	144020216
ACC	ENSR00000232010	8	144040150	144046150
ACC	ENSR00000232018	8	144106717	144112717
ACC	ENSR00000333924	8	144107817	144113817
ACC	ENSR00000232019	8	144107858	144113858
ACC	8:143028397-143034397	8	144109814	144115814
ACC	ENSR00000334026	8	146242486	146248486
ACC	ENSR00000232313	8	146249285	146255285
ACC	ENSR00000334027	8	146249286	146255286
ACC	ENSR00000232320	9	18494	24494
ACC	ENSR00000235397	9	42246795	42252742
ACC	ENSR00000335771	9	42251842	42257623
ACC	ENSR00000238324	9	98567382	98573382
ACC	ENSR00000336877	9	99072782	99078782
ACC	ENSR00000238462	9	99648072	99654072
ACC	ENSR00000337027	9	103152082	103158082
ACC	9:111624107-111630107	9	114386387	114392387
ACC	ENSR00000241588	9	129476519	129482519
ACC	ENSR00000241589	9	129480912	129486912
ACC	ENSR00000338188	9	138808246	138814246
ACC	ENSR00000243144	9	140020252	140026252
ACC	X:1358946-1364946	X	1477839	1483839
ACC	ENSR00000243869	X	2660790	2666790
ACC	ENSR00000245919	X	40129753	40135753
ACC	X:40276017-40282017	X	40135270	40141270
ACC	ENSR00000245927	X	40259334	40265334
ACC	ENSR00000245928	X	40262820	40268820
ACC	ENSR00000246413	X	47363613	47369613
ACC	ENSR00000340736	X	47760599	47766599
ACC	ENSR00000246727	X	54202333	54208333
ACC	ENSR00000246820	X	57924591	57930591
ACC	ENSR00000247113	X	70394372	70400372
ACC	ENSR00000341740	X	73412335	73418335
ACC	ENSR00000247300	X	75400653	75406653
ACC	ENSR00000341824	X	75407635	75413638
ACC	ENSR00000341825	X	75412538	75418536
ACC	ENSR00000342021	X	80936999	80942999
ACC	ENSR00000247704	X	102689592	102695592
ACC	ENSR00000247823	X	106295991	106301991
ACC	ENSR00000247853	X	106895331	106901331
ACC	ENSR00000248296	X	117935316	117941316
ACC	ENSR00000343138	X	117936163	117942163
ACC	ENSR00000248297	X	117938412	117944412
ACC	ENSR00000343139	X	117938563	117944563
ACC	ENSR00000248391	X	119103931	119109931
ACC	ENSR00000343185	X	119108463	119114463
ACC	ENSR00000343186	X	119109463	119115463
ACC	ENSR00000248527	X	122553937	122559937
ACC	ENSR00000343276	X	122553951	122559951
ACC	ENSR00000343627	X	134158730	134164730
ACC	ENSR00000249159	X	138799508	138805508
ACC	ENSR00000249402	X	149648474	149654466
ACC	ENSR00000249403	X	149649088	149655080
ACC	ENSR00000344133	X	152836658	152842658
BLCA	ENSR00000250728	1	23677893	23683893
BLCA	ENSR00000251054	1	31926247	31932247
BLCA	ENSR00000004207	1	32026301	32032301
BLCA	ENSR00000251064	1	32026801	32032801
BLCA	ENSR00000251119	1	33963400	33969400
BLCA	ENSR00000004535	1	33964573	33970573
BLCA	ENSR00000251120	1	33964600	33970600
BLCA	ENSR00000005553	1	43600563	43606563
BLCA	ENSR00000251495	1	43602971	43608971
BLCA	ENSR00000251622	1	47313772	47319772
BLCA	ENSR00000251623	1	47314672	47320672
BLCA	ENSR00000251626	1	47341072	47347072
BLCA	ENSR00000006992	1	56952552	56958552
BLCA	ENSR00000007157	1	59281014	59287014
BLCA	1:68389649-68395649	1	68855332	68861332
BLCA	ENSR00000009091	1	84748970	84754970
BLCA	ENSR00000252733	1	84750383	84756383
BLCA	ENSR00000252734	1	84751383	84757383
BLCA	1:84288834-84294834	1	84754517	84760517
BLCA	ENSR00000010575	1	100166956	100172956
BLCA	ENSR00000253479	1	110320522	110326522
BLCA	ENSR00000011142	1	110322922	110328922
BLCA	ENSR00000253481	1	110355522	110361522
BLCA	ENSR00000011152	1	110355922	110361922
BLCA	ENSR00000011610	1	114231890	114237890
BLCA	ENSR00000011702	1	115102948	115108948
BLCA	ENSR00000253769	1	116679121	116685121
BLCA	ENSR00000012140	1	118378770	118384770
BLCA	ENSR00000253851	1	118382622	118388622
BLCA	ENSR00000012237	1	119698832	119704832
BLCA	ENSR00000012238	1	119700364	119706364
BLCA	ENSR00000012442	1	144600793	144606794
BLCA	ENSR00000012443	1	144601715	144607715
BLCA	ENSR00000012444	1	144603065	144609065
BLCA	ENSR00000013533	1	150604854	150610854
BLCA	ENSR00000013685	1	151827898	151833898
BLCA	ENSR00000013955	1	154639351	154645351
BLCA	ENSR00000254582	1	154639376	154645376
BLCA	ENSR00000254583	1	154647276	154653276
BLCA	ENSR00000014087	1	155537215	155543215
BLCA	ENSR00000014617	1	160957126	160963126
BLCA	ENSR00000254910	1	160957290	160963290
BLCA	1:168559308-168565308	1	168528546	168534546
BLCA	ENSR00000017505	1	193226678	193232678
BLCA	ENSR00000017506	1	193227301	193233301
BLCA	ENSR00000017507	1	193230749	193236749
BLCA	ENSR00000019577	1	211773850	211779850
BLCA	ENSR00000020394	1	220633416	220639416
BLCA	ENSR00000256788	1	220633842	220639842
BLCA	ENSR00000020649	1	222723430	222729430
BLCA	ENSR00000257014	1	226300301	226306301
BLCA	ENSR00000022210	1	235185022	235191022
BLCA	ENSR00000257439	1	236650400	236656400
BLCA	ENSR00000022369	1	236650456	236656456
BLCA	ENSR00000022370	1	236651272	236657272
BLCA	ENSR00000022371	1	236652234	236658234
BLCA	ENSR00000023526	10	3433349	3439349
BLCA	ENSR00000257920	10	3433892	3439892
BLCA	10:3393200-3399200	10	3435392	3441392
BLCA	ENSR00000257921	10	3438293	3444293
BLCA	ENSR00000023528	10	3439092	3445092
BLCA	ENSR00000023529	10	3440292	3446292
BLCA	ENSR00000023530	10	3440843	3446843
BLCA	ENSR00000023559	10	3593592	3599592
BLCA	ENSR00000023561	10	3595727	3601727
BLCA	ENSR00000023560	10	3595792	3601792
BLCA	10:3938144-3944144	10	3980336	3986336
BLCA	10:3940610-3946610	10	3982802	3988802
BLCA	ENSR00000023842	10	5523393	5529393
BLCA	10:5484083-5490083	10	5526046	5532046
BLCA	ENSR00000023843	10	5527639	5533639
BLCA	ENSR00000258015	10	5642463	5648463
BLCA	ENSR00000023865	10	5642955	5648955
BLCA	ENSR00000258386	10	17668699	17674699
BLCA	ENSR00000258722	10	29715729	29721729
BLCA	ENSR00000026082	10	29716193	29722193
BLCA	ENSR00000027155	10	43137747	43143747
BLCA	ENSR00000027724	10	47122077	47128076
BLCA	ENSR00000027558	10	47122116	47128116
BLCA	ENSR00000027726	10	47126616	47132616
BLCA	10:46408840-46414840	10	47134908	47140910
BLCA	ENSR00000027731	10	49209911	49215901
BLCA	ENSR00000031041	10	88963857	88969857
BLCA	ENSR00000031042	10	88968758	88974758
BLCA	ENSR00000031043	10	88970957	88976957
BLCA	ENSR00000260651	10	88971457	88977457
BLCA	ENSR00000031547	10	93106357	93112357
BLCA	ENSR00000031548	10	93107857	93113857
BLCA	10:91520839-91526839	10	93280596	93286596
BLCA	ENSR00000260798	10	93309257	93315257
BLCA	ENSR00000031571	10	93313852	93319852
BLCA	ENSR00000031572	10	93314494	93320494
BLCA	ENSR00000031585	10	93374257	93380257
BLCA	ENSR00000260944	10	97925456	97931456
BLCA	ENSR00000032851	10	104954457	104960457
BLCA	ENSR00000261220	10	105622358	105628358
BLCA	ENSR00000338303	11	123774	131217
BLCA	ENSR00000243306	11	125330	136193
BLCA	ENSR00000243305	11	127523	138368
BLCA	ENSR00000035643	11	512389	518389
BLCA	ENSR00000262415	11	2225830	2231830
BLCA	ENSR00000035913	11	2227146	2233146
BLCA	ENSR00000262508	11	3492030	3498030
BLCA	ENSR00000262509	11	3494630	3500630
BLCA	ENSR00000037151	11	13013817	13019817
BLCA	ENSR00000262893	11	13035147	13041147
BLCA	ENSR00000038731	11	34683853	34689853
BLCA	ENSR00000263612	11	36501150	36507150
BLCA	ENSR00000263774	11	43879550	43885550
BLCA	ENSR00000039212	11	43885284	43891284
BLCA	ENSR00000039213	11	43887650	43893650
BLCA	ENSR00000263789	11	44271550	44277550
BLCA	ENSR00000264041	11	56850275	56856275
BLCA	ENSR00000040210	11	60930972	60936972
BLCA	ENSR00000264246	11	60931272	60937272
BLCA	ENSR00000040211	11	60932045	60938045
BLCA	ENSR00000040212	11	60933262	60939262
BLCA	ENSR00000040875	11	65433472	65439472
BLCA	ENSR00000264543	11	67609971	67615971
BLCA	ENSR00000264544	11	67612571	67618571
BLCA	ENSR00000041357	11	69194168	69200168
BLCA	ENSR00000264626	11	69200168	69206168
BLCA	ENSR00000264768	11	71454646	71460646
BLCA	ENSR00000264769	11	71457046	71463046
BLCA	ENSR00000043150	11	87837088	87843088
BLCA	11:121280143-121286143	11	121150852	121156852
BLCA	ENSR00000047484	12	79173	85173
BLCA	ENSR00000048505	12	8431939	8437939
BLCA	ENSR00000267049	12	8432196	8438196
BLCA	ENSR00000267050	12	8434796	8440796
BLCA	ENSR00000049322	12	16471026	16477026
BLCA	ENSR00000049323	12	16473158	16479158
BLCA	ENSR00000051395	12	47774930	47780930
BLCA	ENSR00000051396	12	47778990	47784990
BLCA	ENSR00000051397	12	47779945	47785945
BLCA	ENSR00000053382	12	66394438	66400438
BLCA	12:114698199-114704199	12	115136004	115142004
BLCA	ENSR00000271434	13	31411637	31417637
BLCA	ENSR00000060694	13	31412464	31418464
BLCA	ENSR00000271728	13	41441236	41447236
BLCA	ENSR00000062792	13	50526239	50532239
BLCA	13:76589783-76595783	13	77163918	77169918
BLCA	ENSR00000065658	13	109914387	109920387
BLCA	ENSR00000065683	13	110071754	110077754
BLCA	ENSR00000065684	13	110073547	110079547
BLCA	ENSR00000273268	13	110073547	110079547
BLCA	ENSR00000065685	13	110076655	110082655
BLCA	ENSR00000066766	14	24050055	24056055
BLCA	ENSR00000273758	14	24050509	24056509
BLCA	ENSR00000273807	14	24939706	24945706
BLCA	ENSR00000068090	14	50493906	50499906
BLCA	14:50028128-50034128	14	50494846	50500846
BLCA	ENSR00000068091	14	50495519	50501519
BLCA	14:105069641-105075641	14	105535978	105541978
BLCA	ENSR00000074563	15	32756201	32762201
BLCA	ENSR00000074564	15	32758401	32764401
BLCA	ENSR00000074565	15	32759501	32765501
BLCA	ENSR00000075512	15	40687702	40693702
BLCA	ENSR00000075569	15	41151441	41157441
BLCA	ENSR00000079292	15	75020419	75026419
BLCA	ENSR00000080396	15	82972454	82978444
BLCA	ENSR00000080397	15	82975594	82981587
BLCA	ENSR00000082399	16	1953965	1959965
BLCA	ENSR00000280226	16	28382907	28388907
BLCA	ENSR00000280227	16	28383621	28389621
BLCA	ENSR00000084886	16	28383732	28389732
BLCA	ENSR00000085043	16	29428327	29434327
BLCA	ENSR00000085229	16	30643021	30649021
BLCA	ENSR00000087861	16	74352485	74358485
BLCA	ENSR00000088030	16	75623198	75629198
BLCA	ENSR00000282517	17	14131417	14137417
BLCA	ENSR00000091521	17	14131745	14137745
BLCA	ENSR00000091626	17	15331817	15337817
BLCA	ENSR00000092461	17	21179112	21185112
BLCA	ENSR00000282764	17	21180512	21186512
BLCA	ENSR00000092462	17	21180538	21186538
BLCA	ENSR00000092878	17	27880034	27886034
BLCA	ENSR00000094486	17	41070166	41076166
BLCA	ENSR00000094487	17	41074117	41080117
BLCA	ENSR00000283527	17	43575966	43581966
BLCA	ENSR00000285897	18	43376665	43382665
BLCA	ENSR00000102816	18	43379965	43385965
BLCA	ENSR00000104450	18	60725734	60731734
BLCA	ENSR00000104451	18	60726676	60732676
BLCA	ENSR00000104452	18	60727486	60733486
BLCA	19:9742459-9748459	19	9853135	9859135
BLCA	ENSR00000287548	19	13948914	13954914
BLCA	ENSR00000287618	19	15701611	15707611
BLCA	ENSR00000107667	19	15703033	15709033
BLCA	19:15632599-15638599	19	15743409	15749409
BLCA	19:20366533-20372533	19	20477342	20483342
BLCA	ENSR00000288220	19	36060702	36066702
BLCA	ENSR00000288221	19	36062202	36068202
BLCA	19:36677323-36683323	19	37168225	37174225
BLCA	ENSR00000109507	19	40817798	40823798
BLCA	ENSR00000289014	19	52015254	52021254
BLCA	ENSR00000111203	19	52015345	52021345
BLCA	ENSR00000111372	19	53963703	53969703
BLCA	ENSR00000112643	2	9890581	9896581
BLCA	ENSR00000113008	2	12161438	12167438
BLCA	ENSR00000113727	2	20288661	20294661
BLCA	ENSR00000113728	2	20290661	20296661
BLCA	ENSR00000113746	2	20379418	20385418
BLCA	ENSR00000113747	2	20380061	20386061
BLCA	ENSR00000113748	2	20382261	20388261
BLCA	ENSR00000290026	2	20858460	20864460
BLCA	ENSR00000113854	2	20858494	20864494
BLCA	2:28428079-28434079	2	28650946	28656946
BLCA	ENSR00000115040	2	33138492	33144492
BLCA	ENSR00000115682	2	39704048	39710048
BLCA	ENSR00000115683	2	39706041	39712041
BLCA	ENSR00000115689	2	39719241	39725241
BLCA	ENSR00000115690	2	39721744	39727744
BLCA	ENSR00000115691	2	39724941	39730941
BLCA	ENSR00000116100	2	43301478	43307478
BLCA	ENSR00000116101	2	43303338	43309338
BLCA	ENSR00000116102	2	43305038	43311038
BLCA	ENSR00000116103	2	43309538	43315538
BLCA	ENSR00000116671	2	46856693	46862693
BLCA	ENSR00000290783	2	46856739	46862739
BLCA	ENSR00000118753	2	71308030	71314030
BLCA	ENSR00000291740	2	81807824	81813824
BLCA	ENSR00000119748	2	86723132	86729132
BLCA	ENSR00000123167	2	132266319	132272319
BLCA	ENSR00000294778	2	174389428	174395428
BLCA	ENSR00000294779	2	174394428	174400428
BLCA	ENSR00000127898	2	191618018	191624018
BLCA	ENSR00000295441	2	197682924	197688924
BLCA	ENSR00000128358	2	197683110	197689110
BLCA	2:196818845-196824845	2	197683569	197689569
BLCA	ENSR00000128359	2	197685696	197691696
BLCA	ENSR00000129352	2	207659724	207665724
BLCA	ENSR00000130451	2	219622392	219628392
BLCA	ENSR00000130536	2	220230820	220236820
BLCA	ENSR00000133397	20	291770	297770
BLCA	20:3176120-3182120	20	3156766	3162766
BLCA	20:19748082-19754082	20	19728726	19734726
BLCA	ENSR00000135335	20	19728744	19734744
BLCA	ENSR00000136364	20	32716518	32722518
BLCA	ENSR00000298226	20	32717006	32723006
BLCA	ENSR00000136365	20	32717984	32723984
BLCA	ENSR00000298227	20	32720106	32726106
BLCA	ENSR00000136584	20	34196609	34202609
BLCA	ENSR00000137463	20	42730876	42736876
BLCA	ENSR00000137722	20	44553107	44559107
BLCA	ENSR00000299617	21	10489928	10495928
BLCA	ENSR00000140270	21	10489964	10495964
BLCA	ENSR00000299618	21	10492228	10498228
BLCA	ENSR00000140824	21	27601957	27607957
BLCA	ENSR00000140825	21	27605820	27611820
BLCA	ENSR00000141543	21	34733606	34739606
BLCA	ENSR00000142710	21	43719410	43725410
BLCA	ENSR00000300544	21	44204310	44210310
BLCA	ENSR00000142795	21	44350410	44356410
BLCA	ENSR00000142796	21	44351877	44357877
BLCA	21:42933046-42939046	21	44353156	44359156
BLCA	ENSR00000142797	21	44354410	44360410
BLCA	ENSR00000142859	21	44765580	44771580
BLCA	21:43346284-43352284	21	44766164	44772164
BLCA	21:43433470-43439470	21	44853350	44859350
BLCA	ENSR00000143789	22	19735794	19741794
BLCA	ENSR00000144311	22	24250281	24256281
BLCA	ENSR00000144312	22	24253187	24259187
BLCA	ENSR00000144853	22	28323454	28329454
BLCA	ENSR00000145621	22	35062206	35068205
BLCA	ENSR00000145812	22	36613739	36619739
BLCA	ENSR00000145813	22	36614946	36620946
BLCA	ENSR00000301799	22	36615146	36621146
BLCA	ENSR00000146558	22	41134330	41140330
BLCA	ENSR00000148645	3	12493043	12499043
BLCA	ENSR00000148646	3	12497599	12503599
BLCA	3:15651471-15657471	3	15692978	15698978
BLCA	3:31646637-31652637	3	31688129	31694129
BLCA	ENSR00000303357	3	33492292	33498292
BLCA	ENSR00000303848	3	46091892	46097892
BLCA	ENSR00000304688	3	74929951	74935951
BLCA	ENSR00000304730	3	75730951	75736951
BLCA	ENSR00000304731	3	75734051	75740051
BLCA	ENSR00000304732	3	75735651	75741651
BLCA	ENSR00000155785	3	101406977	101412977
BLCA	ENSR00000155786	3	101409632	101415632
BLCA	ENSR00000305256	3	101409644	101415644
BLCA	ENSR00000155787	3	101411805	101417805
BLCA	ENSR00000305257	3	101411844	101417844
BLCA	ENSR00000306266	3	132088244	132094244
BLCA	ENSR00000160285	3	151504967	151510967
BLCA	ENSR00000160286	3	151507286	151513286
BLCA	3:165494802-165500802	3	165212590	165218590
BLCA	3:165495370-165501370	3	165213158	165219158
BLCA	ENSR00000163375	3	187546387	187552387
BLCA	ENSR00000307963	3	187547188	187553188
BLCA	ENSR00000163984	3	193537857	193543857
BLCA	ENSR00000163985	3	193541389	193547389
BLCA	ENSR00000163986	3	193542879	193548879
BLCA	ENSR00000163987	3	193544689	193550689
BLCA	ENSR00000308163	3	194033989	194039989
BLCA	ENSR00000164079	3	194035738	194041738
BLCA	ENSR00000164366	3	195889571	195895571
BLCA	ENSR00000164367	3	195894354	195900354
BLCA	ENSR00000308259	3	196702671	196708671
BLCA	ENSR00000164478	3	196702814	196708814
BLCA	ENSR00000164479	3	196703571	196709571
BLCA	ENSR00000164707	4	766606	772606
BLCA	ENSR00000165933	4	11438652	11444652
BLCA	ENSR00000309103	4	17791623	17797623
BLCA	4:35103132-35109132	4	35104754	35110754
BLCA	ENSR00000167396	4	37873921	37879921
BLCA	ENSR00000309925	4	53528967	53534967
BLCA	ENSR00000310566	4	77834653	77840653
BLCA	ENSR00000310568	4	77859053	77865053
BLCA	ENSR00000169560	4	77861513	77867513
BLCA	ENSR00000169561	4	77862060	77868060
BLCA	ENSR00000170061	4	84001954	84007954
BLCA	ENSR00000172593	4	121949050	121955050
BLCA	ENSR00000172804	4	124326761	124332761
BLCA	ENSR00000172942	4	125240617	125246617
BLCA	ENSR00000311923	4	125240655	125246655
BLCA	ENSR00000173220	4	129174859	129180859
BLCA	ENSR00000173221	4	129178271	129184271
BLCA	ENSR00000313236	4	177259451	177265451
BLCA	ENSR00000313237	4	177261951	177267951
BLCA	ENSR00000313273	4	178580954	178586954
BLCA	ENSR00000177388	5	260677	266677
BLCA	ENSR00000313719	5	1346415	1352415
BLCA	5:1562421-1568421	5	1562536	1568536
BLCA	ENSR00000314177	5	21467109	21473109
BLCA	ENSR00000179201	5	33431170	33437170
BLCA	ENSR00000314379	5	33433106	33439106
BLCA	ENSR00000179202	5	33433107	33439107
BLCA	5:37099086-37105086	5	37099188	37105188
BLCA	5:43048497-43054497	5	43048599	43054599
BLCA	ENSR00000314764	5	44209602	44215602
BLCA	5:44213019-44219019	5	44213121	44219121
BLCA	ENSR00000186034	5	122556790	122562790
BLCA	ENSR00000186035	5	122559039	122565039
BLCA	5:136546882-136552882	5	135882571	135888571
BLCA	5:138939407-138945407	5	138275096	138281096
BLCA	ENSR00000317499	5	138879785	138885785
BLCA	ENSR00000187665	5	138888652	138894652
BLCA	ENSR00000317500	5	138889585	138895585
BLCA	ENSR00000187666	5	138890285	138896285
BLCA	ENSR00000317501	5	138890485	138896485
BLCA	ENSR00000188605	5	147195017	147201017
BLCA	5:147836248-147842248	5	147215811	147221811
BLCA	ENSR00000189125	5	150873061	150879061
BLCA	ENSR00000189126	5	150873661	150879661
BLCA	ENSR00000189170	5	151106348	151112348
BLCA	ENSR00000317983	5	151106461	151112461
BLCA	ENSR00000319047	6	353900	359900
BLCA	ENSR00000191818	6	353981	359981
BLCA	ENSR00000195227	6	28384991	28390991
BLCA	ENSR00000320173	6	30241877	30247877
BLCA	ENSR00000320261	6	31817577	31823577
BLCA	ENSR00000197645	6	47091636	47097636
BLCA	ENSR00000197646	6	47095106	47101106
BLCA	ENSR00000197649	6	47109385	47115385
BLCA	ENSR00000197650	6	47110102	47116102
BLCA	ENSR00000321477	6	74962116	74968116
BLCA	ENSR00000198927	6	74962542	74968542
BLCA	ENSR00000199718	6	86377018	86383018
BLCA	ENSR00000201430	6	113490802	113496802
BLCA	ENSR00000204526	6	145240452	145246452
BLCA	ENSR00000204527	6	145249731	145255731
BLCA	ENSR00000323536	6	145249736	145255736
BLCA	ENSR00000205037	6	149814933	149820933
BLCA	ENSR00000205038	6	149817336	149823336
BLCA	ENSR00000205309	6	151718848	151724848
BLCA	ENSR00000324031	6	161208132	161214132
BLCA	ENSR00000206389	6	161208532	161214532
BLCA	ENSR00000206390	6	161210300	161216300
BLCA	6:166979007-166985007	6	167392495	167398495
BLCA	ENSR00000207175	6	169725618	169731618
BLCA	ENSR00000324472	7	1184036	1190036
BLCA	ENSR00000324757	7	8389430	8395430
BLCA	ENSR00000208864	7	17030287	17036287
BLCA	ENSR00000324951	7	17033324	17039324
BLCA	ENSR00000208867	7	17052350	17058350
BLCA	ENSR00000208868	7	17053228	17059228
BLCA	ENSR00000324954	7	17088124	17094124
BLCA	ENSR00000324955	7	17090124	17096124
BLCA	ENSR00000208876	7	17090987	17096987
BLCA	7:17052139-17058139	7	17091763	17097763
BLCA	ENSR00000208877	7	17092382	17098382
BLCA	ENSR00000208878	7	17093404	17099404
BLCA	ENSR00000208879	7	17095424	17101424
BLCA	ENSR00000208921	7	17429687	17435687
BLCA	ENSR00000324962	7	17431424	17437424
BLCA	ENSR00000208925	7	17452729	17458729
BLCA	ENSR00000208926	7	17457433	17463433
BLCA	ENSR00000208927	7	17459888	17465888
BLCA	ENSR00000324963	7	17465024	17471024
BLCA	ENSR00000208930	7	17481462	17487462
BLCA	ENSR00000324968	7	17511824	17517824
BLCA	ENSR00000211619	7	42920810	42926810
BLCA	ENSR00000325922	7	42922999	42928999
BLCA	ENSR00000212043	7	46390477	46396477
BLCA	ENSR00000326311	7	56437093	56443093
BLCA	ENSR00000212761	7	56437173	56443173
BLCA	ENSR00000212833	7	64404978	64410978
BLCA	ENSR00000326458	7	64408778	64414778
BLCA	ENSR00000212882	7	65184421	65190421
BLCA	ENSR00000326525	7	65184473	65190473
BLCA	ENSR00000213403	7	72443311	72449310
BLCA	ENSR00000326719	7	72695817	72701802
BLCA	ENSR00000213692	7	74288096	74294099
BLCA	ENSR00000216272	7	104627231	104633231
BLCA	ENSR00000216845	7	111992678	111998678
BLCA	ENSR00000218550	7	134857999	134863999
BLCA	ENSR00000218551	7	134859138	134865138
BLCA	ENSR00000328842	7	143305893	143311893
BLCA	ENSR00000328997	7	149235891	149241891
BLCA	ENSR00000329454	8	251500	257500
BLCA	ENSR00000329754	8	8032122	8038122
BLCA	ENSR00000329755	8	8034822	8040822
BLCA	ENSR00000220688	8	8034989	8040989
BLCA	ENSR00000221178	8	12339705	12345705
BLCA	ENSR00000329960	8	12340009	12346009
BLCA	ENSR00000329961	8	12342509	12348509
BLCA	ENSR00000329966	8	12406909	12412909
BLCA	8:38217049-38223049	8	38074567	38080567
BLCA	ENSR00000226752	8	90713651	90719651
BLCA	ENSR00000226753	8	90714440	90720440
BLCA	ENSR00000332564	8	101573328	101579328
BLCA	ENSR00000227958	8	101573429	101579429
BLCA	ENSR00000227959	8	101576722	101582722
BLCA	ENSR00000228046	8	102183061	102189061
BLCA	ENSR00000228089	8	102483529	102489529
BLCA	ENSR00000332607	8	102497328	102503328
BLCA	ENSR00000228886	8	116006058	116012058
BLCA	ENSR00000332958	8	116006329	116012329
BLCA	ENSR00000230222	8	125907542	125913542
BLCA	ENSR00000333272	8	125909142	125915142
BLCA	ENSR00000230223	8	125915042	125921042
BLCA	ENSR00000333273	8	125917542	125923542
BLCA	ENSR00000230605	8	128909146	128915146
BLCA	ENSR00000230874	8	130698774	130704774
BLCA	8:129687233-129693233	8	130699479	130705479
BLCA	ENSR00000230875	8	130700378	130706378
BLCA	ENSR00000333924	8	144107817	144113817
BLCA	ENSR00000232019	8	144107858	144113858
BLCA	8:143028397-143034397	8	144109814	144115814
BLCA	ENSR00000333965	8	144829670	144835670
BLCA	ENSR00000333966	8	144831270	144837270
BLCA	ENSR00000333971	8	144927672	144933672
BLCA	ENSR00000232320	9	18494	24494
BLCA	ENSR00000335037	9	36678697	36684697
BLCA	ENSR00000235397	9	42246795	42252742
BLCA	ENSR00000335771	9	42251842	42257623
BLCA	ENSR00000335513	9	66471024	66477024
BLCA	ENSR00000335514	9	66474024	66480024
BLCA	ENSR00000335517	9	66485324	66491324
BLCA	ENSR00000236796	9	85682372	85688372
BLCA	ENSR00000336877	9	99072782	99078782
BLCA	ENSR00000238462	9	99648072	99654072
BLCA	ENSR00000239940	9	114963051	114969051
BLCA	ENSR00000239941	9	114965190	114971190
BLCA	ENSR00000338188	9	138808246	138814246
BLCA	ENSR00000243144	9	140020252	140026252
BLCA	ENSR00000243859	X	2578586	2584586
BLCA	ENSR00000243860	X	2579801	2585801
BLCA	ENSR00000243861	X	2581723	2587723
BLCA	ENSR00000243869	X	2660790	2666790
BLCA	ENSR00000243982	X	3726744	3732744
BLCA	ENSR00000243983	X	3727241	3733241
BLCA	ENSR00000339530	X	3727241	3733241
BLCA	ENSR00000339537	X	4462441	4468441
BLCA	ENSR00000246413	X	47363613	47369613
BLCA	ENSR00000246721	X	53954379	53960379
BLCA	ENSR00000246727	X	54202333	54208333
BLCA	ENSR00000341740	X	73412335	73418335
BLCA	ENSR00000247300	X	75400653	75406653
BLCA	ENSR00000341824	X	75407635	75413638
BLCA	ENSR00000341825	X	75412538	75418536
BLCA	ENSR00000247402	X	80255599	80261599
BLCA	ENSR00000342001	X	80256499	80262499
BLCA	ENSR00000342021	X	80936999	80942999
BLCA	ENSR00000342694	X	105996830	106002830
BRCA	ENSR00000003012	1	23614597	23620597
BRCA	ENSR00000250728	1	23677893	23683893
BRCA	ENSR00000251054	1	31926247	31932247
BRCA	ENSR00000251119	1	33963400	33969400
BRCA	ENSR00000004535	1	33964573	33970573
BRCA	ENSR00000251120	1	33964600	33970600
BRCA	ENSR00000251492	1	43577771	43583771
BRCA	ENSR00000251493	1	43578571	43584571
BRCA	ENSR00000005553	1	43600563	43606563
BRCA	ENSR00000251495	1	43602971	43608971
BRCA	ENSR00000251618	1	47288272	47294272
BRCA	ENSR00000251619	1	47289172	47295172
BRCA	ENSR00000251620	1	47298972	47304972
BRCA	ENSR00000251622	1	47313772	47319772
BRCA	ENSR00000251623	1	47314672	47320672
BRCA	ENSR00000006992	1	56952552	56958552
BRCA	ENSR00000007157	1	59281014	59287014
BRCA	ENSR00000252733	1	84750383	84756383
BRCA	ENSR00000010575	1	100166956	100172956
BRCA	ENSR00000253250	1	100722256	100728256
BRCA	ENSR00000011610	1	114231890	114237890
BRCA	ENSR00000253688	1	115102521	115108521
BRCA	ENSR00000011702	1	115102948	115108948
BRCA	ENSR00000012140	1	118378770	118384770
BRCA	ENSR00000253851	1	118382622	118388622
BRCA	ENSR00000253852	1	118384922	118390922
BRCA	ENSR00000012141	1	118385999	118391999
BRCA	ENSR00000012237	1	119698832	119704832
BRCA	ENSR00000012238	1	119700364	119706364
BRCA	ENSR00000012442	1	144600793	144606794
BRCA	ENSR00000012443	1	144601715	144607715
BRCA	ENSR00000012444	1	144603065	144609065
BRCA	ENSR00000012851	1	149661697	149667692
BRCA	ENSR00000013524	1	150565776	150571776
BRCA	ENSR00000013533	1	150604854	150610854
BRCA	ENSR00000013685	1	151827898	151833898
BRCA	ENSR00000254583	1	154647276	154653276
BRCA	ENSR00000014087	1	155537215	155543215
BRCA	ENSR00000014617	1	160957126	160963126
BRCA	ENSR00000254910	1	160957290	160963290
BRCA	ENSR00000017505	1	193226678	193232678
BRCA	ENSR00000017506	1	193227301	193233301
BRCA	ENSR00000017507	1	193230749	193236749
BRCA	ENSR00000020649	1	222723430	222729430
BRCA	ENSR00000021066	1	226236265	226242265
BRCA	ENSR00000022209	1	235183847	235189847
BRCA	ENSR00000022210	1	235185022	235191022
BRCA	ENSR00000257439	1	236650400	236656400
BRCA	ENSR00000022369	1	236650456	236656456
BRCA	ENSR00000022370	1	236651272	236657272
BRCA	ENSR00000022371	1	236652234	236658234
BRCA	ENSR00000023840	10	5518799	5524799
BRCA	ENSR00000023841	10	5519364	5525364
BRCA	ENSR00000023842	10	5523393	5529393
BRCA	ENSR00000023843	10	5527639	5533639
BRCA	ENSR00000258012	10	5531563	5537563
BRCA	10:5490874-5496874	10	5532837	5538837
BRCA	10:8864278-8870278	10	8906241	8912241
BRCA	ENSR00000258110	10	8907963	8913963
BRCA	10:8882679-8888679	10	8924642	8930642
BRCA	10:8886414-8892414	10	8928377	8934377
BRCA	ENSR00000258113	10	9095763	9101763
BRCA	ENSR00000025418	10	22035846	22041846
BRCA	ENSR00000025419	10	22036377	22042377
BRCA	10:21747754-21753754	10	22036683	22042683
BRCA	ENSR00000258722	10	29715729	29721729
BRCA	ENSR00000026082	10	29716193	29722193
BRCA	ENSR00000258981	10	37720128	37726128
BRCA	10:43547939-43553939	10	44043387	44049387
BRCA	ENSR00000259488	10	50638546	50644546
BRCA	ENSR00000027894	10	50646946	50652946
BRCA	ENSR00000027895	10	50651268	50657268
BRCA	ENSR00000027896	10	50652240	50658240
BRCA	ENSR00000031041	10	88963857	88969857
BRCA	ENSR00000031042	10	88968758	88974758
BRCA	ENSR00000031043	10	88970957	88976957
BRCA	ENSR00000260651	10	88971457	88977457
BRCA	ENSR00000031044	10	88973053	88979053
BRCA	ENSR00000031055	10	89071293	89077293
BRCA	ENSR00000260944	10	97925456	97931456
BRCA	ENSR00000261220	10	105622358	105628358
BRCA	ENSR00000338303	11	123774	131217
BRCA	ENSR00000243306	11	125330	136193
BRCA	ENSR00000243305	11	127523	138368
BRCA	ENSR00000035643	11	512389	518389
BRCA	ENSR00000262508	11	3492030	3498030
BRCA	ENSR00000262509	11	3494630	3500630
BRCA	ENSR00000037151	11	13013817	13019817
BRCA	ENSR00000262893	11	13035147	13041147
BRCA	ENSR00000038731	11	34683853	34689853
BRCA	ENSR00000263612	11	36501150	36507150
BRCA	ENSR00000263774	11	43879550	43885550
BRCA	ENSR00000039212	11	43885284	43891284
BRCA	ENSR00000039213	11	43887650	43893650
BRCA	ENSR00000263789	11	44271550	44277550
BRCA	ENSR00000264041	11	56850275	56856275
BRCA	ENSR00000040875	11	65433472	65439472
BRCA	ENSR00000264543	11	67609971	67615971
BRCA	ENSR00000264544	11	67612571	67618571
BRCA	11:69528322-69534322	11	69343090	69349090
BRCA	ENSR00000041607	11	71451738	71457738
BRCA	ENSR00000264768	11	71454646	71460646
BRCA	ENSR00000264769	11	71457046	71463046
BRCA	ENSR00000043150	11	87837088	87843088
BRCA	ENSR00000045056	11	112669436	112675436
BRCA	ENSR00000047484	12	79173	85173
BRCA	ENSR00000048341	12	6842166	6848166
BRCA	ENSR00000048866	12	12183034	12189034
BRCA	ENSR00000267210	12	12183634	12189634
BRCA	ENSR00000053382	12	66394438	66400438
BRCA	13:23712092-23718092	13	24286231	24292231
BRCA	ENSR00000271171	13	24287139	24293139
BRCA	ENSR00000059950	13	24294839	24300839
BRCA	ENSR00000059951	13	24295340	24301340
BRCA	ENSR00000059952	13	24295979	24301979
BRCA	ENSR00000061665	13	41119137	41125137
BRCA	ENSR00000271728	13	41441236	41447236
BRCA	13:76589783-76595783	13	77163918	77169918
BRCA	ENSR00000065683	13	110071754	110077754
BRCA	ENSR00000065684	13	110073547	110079547
BRCA	ENSR00000273268	13	110073547	110079547
BRCA	ENSR00000065685	13	110076655	110082655
BRCA	ENSR00000066766	14	24050055	24056055
BRCA	ENSR00000273758	14	24050509	24056509
BRCA	ENSR00000273807	14	24939706	24945706
BRCA	ENSR00000274167	14	38049805	38055805
BRCA	ENSR00000067777	14	38049958	38055958
BRCA	14:37582153-37588153	14	38051358	38057358
BRCA	ENSR00000067825	14	38714693	38720693
BRCA	ENSR00000274200	14	38715005	38721005
BRCA	14:43647860-43653860	14	44117063	44123063
BRCA	ENSR00000068090	14	50493906	50499906
BRCA	ENSR00000068091	14	50495519	50501519
BRCA	ENSR00000072556	14	95225164	95231164
BRCA	ENSR00000073756	14	105496827	105502827
BRCA	14:105033430-105039430	14	105499767	105505767
BRCA	14:105041942-105047942	14	105508279	105514279
BRCA	14:105069641-105075641	14	105535978	105541978
BRCA	ENSR00000074383	15	30714403	30720403
BRCA	ENSR00000074384	15	30715103	30721103
BRCA	ENSR00000074563	15	32756201	32762201
BRCA	ENSR00000074564	15	32758401	32764401
BRCA	ENSR00000074565	15	32759501	32765501
BRCA	ENSR00000075192	15	39169501	39175501
BRCA	ENSR00000075512	15	40687702	40693702
BRCA	ENSR00000075569	15	41151441	41157441
BRCA	ENSR00000080396	15	82972454	82978444
BRCA	ENSR00000279451	16	2697501	2703501
BRCA	ENSR00000082518	16	2697728	2703728
BRCA	ENSR00000082519	16	2702243	2708243
BRCA	ENSR00000279969	16	20309022	20315022
BRCA	ENSR00000085229	16	30643021	30649021
BRCA	ENSR00000085256	16	30837828	30843828
BRCA	ENSR00000281394	16	71620103	71626103
BRCA	ENSR00000087861	16	74352485	74358485
BRCA	ENSR00000087862	16	74353471	74359471
BRCA	ENSR00000088030	16	75623198	75629198
BRCA	ENSR00000282517	17	14131417	14137417
BRCA	ENSR00000091521	17	14131745	14137745
BRCA	ENSR00000091626	17	15331817	15337817
BRCA	ENSR00000282730	17	20310713	20316713
BRCA	ENSR00000092461	17	21179112	21185112
BRCA	ENSR00000282764	17	21180512	21186512
BRCA	ENSR00000092462	17	21180538	21186538
BRCA	17:32393542-32399542	17	30720561	30726561
BRCA	17:32394871-32400871	17	30721890	30727890
BRCA	17:41533216-41539216	17	39689468	39695468
BRCA	ENSR00000283458	17	41394061	41400064
BRCA	ENSR00000094548	17	41396649	41402652
BRCA	17:43340887-43346887	17	41418255	41424255
BRCA	ENSR00000094947	17	43575166	43581166
BRCA	ENSR00000283527	17	43575966	43581966
BRCA	17:79754225-79760225	17	77728024	77734024
BRCA	ENSR00000101151	18	14922507	14928507
BRCA	ENSR00000287548	19	13948914	13954914
BRCA	ENSR00000287617	19	15700011	15706011
BRCA	ENSR00000287618	19	15701611	15707611
BRCA	ENSR00000107667	19	15703033	15709033
BRCA	ENSR00000287619	19	15704711	15710711
BRCA	ENSR00000287800	19	20476009	20482009
BRCA	19:36677323-36683323	19	37168225	37174225
BRCA	ENSR00000109507	19	40817798	40823798
BRCA	ENSR00000111372	19	53963703	53969703
BRCA	ENSR00000113008	2	12161438	12167438
BRCA	ENSR00000115040	2	33138492	33144492
BRCA	ENSR00000290529	2	38624742	38630742
BRCA	ENSR00000115545	2	38663143	38669143
BRCA	ENSR00000115682	2	39704048	39710048
BRCA	ENSR00000115683	2	39706041	39712041
BRCA	ENSR00000115689	2	39719241	39725241
BRCA	ENSR00000115690	2	39721744	39727744
BRCA	ENSR00000116671	2	46856693	46862693
BRCA	ENSR00000290783	2	46856739	46862739
BRCA	ENSR00000118753	2	71308030	71314030
BRCA	ENSR00000119272	2	75501142	75507142
BRCA	ENSR00000119748	2	86723132	86729132
BRCA	ENSR00000119827	2	87543523	87549523
BRCA	ENSR00000291926	2	87887619	87893619
BRCA	ENSR00000119992	2	89162812	89168812
BRCA	ENSR00000292392	2	97935537	97941537
BRCA	ENSR00000122295	2	119516581	119522581
BRCA	ENSR00000293168	2	119518476	119524476
BRCA	ENSR00000122296	2	119518515	119524515
BRCA	ENSR00000123167	2	132266319	132272319
BRCA	ENSR00000293591	2	132369373	132375373
BRCA	ENSR00000293592	2	132370273	132376273
BRCA	ENSR00000293597	2	132411673	132417673
BRCA	ENSR00000293598	2	132412673	132418673
BRCA	ENSR00000293599	2	132413073	132419073
BRCA	ENSR00000123176	2	132413982	132419982
BRCA	ENSR00000123177	2	132416778	132422778
BRCA	ENSR00000293600	2	132423373	132429373
BRCA	ENSR00000123178	2	132423873	132429873
BRCA	ENSR00000293601	2	132424473	132430473
BRCA	ENSR00000123179	2	132427803	132433803
BRCA	ENSR00000294778	2	174389428	174395428
BRCA	ENSR00000295441	2	197682924	197688924
BRCA	ENSR00000128358	2	197683110	197689110
BRCA	2:196818845-196824845	2	197683569	197689569
BRCA	ENSR00000128359	2	197685696	197691696
BRCA	ENSR00000129352	2	207659724	207665724
BRCA	ENSR00000295885	2	214113424	214119424
BRCA	ENSR00000129762	2	214113524	214119524
BRCA	ENSR00000130451	2	219622392	219628392
BRCA	ENSR00000130536	2	220230820	220236820
BRCA	ENSR00000133367	2	242924651	242930651
BRCA	ENSR00000296966	2	242926751	242932751
BRCA	ENSR00000133396	20	287645	293645
BRCA	ENSR00000133397	20	291770	297770
BRCA	ENSR00000133401	20	319345	325345
BRCA	ENSR00000297000	20	319944	325944
BRCA	20:3176120-3182120	20	3156766	3162766
BRCA	ENSR00000297873	20	25161136	25167136
BRCA	ENSR00000136365	20	32717984	32723984
BRCA	ENSR00000298227	20	32720106	32726106
BRCA	ENSR00000137722	20	44553107	44559107
BRCA	ENSR00000138035	20	46600945	46606945
BRCA	ENSR00000139291	20	56297297	56303297
BRCA	ENSR00000139292	20	56299293	56305293
BRCA	ENSR00000139311	20	56558065	56564065
BRCA	ENSR00000299344	20	62142853	62148853
BRCA	ENSR00000299617	21	10489928	10495928
BRCA	ENSR00000140270	21	10489964	10495964
BRCA	ENSR00000299618	21	10492228	10498228
BRCA	ENSR00000140824	21	27601957	27607957
BRCA	ENSR00000140825	21	27605820	27611820
BRCA	ENSR00000141543	21	34733606	34739606
BRCA	ENSR00000142710	21	43719410	43725410
BRCA	ENSR00000144311	22	24250281	24256281
BRCA	ENSR00000144312	22	24253187	24259187
BRCA	ENSR00000146558	22	41134330	41140330
BRCA	ENSR00000301957	22	41138904	41144904
BRCA	ENSR00000302135	22	46412680	46418680
BRCA	ENSR00000147309	22	46416697	46422697
BRCA	ENSR00000302853	3	15695407	15701407
BRCA	ENSR00000303726	3	43108792	43114792
BRCA	ENSR00000303727	3	43109992	43115992
BRCA	ENSR00000303874	3	46466391	46472391
BRCA	ENSR00000151870	3	46466626	46472626
BRCA	ENSR00000304730	3	75730951	75736951
BRCA	ENSR00000304731	3	75734051	75740051
BRCA	ENSR00000155785	3	101406977	101412977
BRCA	ENSR00000155786	3	101409632	101415632
BRCA	ENSR00000305256	3	101409644	101415644
BRCA	ENSR00000155787	3	101411805	101417805
BRCA	ENSR00000305257	3	101411844	101417844
BRCA	3:101702711-101708711	3	101421555	101427555
BRCA	ENSR00000306140	3	129079743	129085743
BRCA	ENSR00000158215	3	129081848	129087848
BRCA	ENSR00000158324	3	129856771	129862771
BRCA	ENSR00000306170	3	129859643	129865643
BRCA	ENSR00000159934	3	148949846	148955846
BRCA	ENSR00000159954	3	149055287	149061287
BRCA	ENSR00000159955	3	149057887	149063887
BRCA	ENSR00000306834	3	149058987	149064987
BRCA	ENSR00000159956	3	149067388	149073388
BRCA	ENSR00000306835	3	149067487	149073487
BRCA	ENSR00000307660	3	177472588	177478588
BRCA	ENSR00000162980	3	184419050	184425050
BRCA	ENSR00000163599	3	188652365	188658365
BRCA	ENSR00000163985	3	193541389	193547389
BRCA	ENSR00000163986	3	193542879	193548879
BRCA	3:193825696-193831696	3	193543485	193549485
BRCA	ENSR00000163987	3	193544689	193550689
BRCA	ENSR00000308331	4	162289	168289
BRCA	4:260619-266619	4	254408	260408
BRCA	ENSR00000164707	4	766606	772606
BRCA	ENSR00000309103	4	17791623	17797623
BRCA	ENSR00000309925	4	53528967	53534967
BRCA	ENSR00000310568	4	77859053	77865053
BRCA	ENSR00000169560	4	77861513	77867513
BRCA	ENSR00000169561	4	77862060	77868060
BRCA	ENSR00000172593	4	121949050	121955050
BRCA	ENSR00000172804	4	124326761	124332761
BRCA	ENSR00000173220	4	129174859	129180859
BRCA	ENSR00000173221	4	129178271	129184271
BRCA	ENSR00000174118	4	144149010	144155010
BRCA	ENSR00000312790	4	158723352	158729352
BRCA	ENSR00000313236	4	177259451	177265451
BRCA	ENSR00000313237	4	177261951	177267951
BRCA	ENSR00000313273	4	178580954	178586954
BRCA	ENSR00000177511	5	1125269	1131269
BRCA	5:1126904-1132904	5	1127019	1133019
BRCA	ENSR00000177512	5	1127515	1133515
BRCA	ENSR00000313719	5	1346415	1352415
BRCA	5:1562421-1568421	5	1562536	1568536
BRCA	ENSR00000314177	5	21467109	21473109
BRCA	ENSR00000314379	5	33433106	33439106
BRCA	ENSR00000179202	5	33433107	33439107
BRCA	5:37099086-37105086	5	37099188	37105188
BRCA	ENSR00000186034	5	122556790	122562790
BRCA	ENSR00000186035	5	122559039	122565039
BRCA	5:138939407-138945407	5	138275096	138281096
BRCA	ENSR00000189170	5	151106348	151112348
BRCA	ENSR00000317983	5	151106461	151112461
BRCA	ENSR00000189171	5	151110545	151116545
BRCA	ENSR00000318620	5	172992803	172998803
BRCA	ENSR00000318784	5	176742001	176748001
BRCA	ENSR00000191318	5	176742096	176748096
BRCA	ENSR00000191319	5	176745118	176751118
BRCA	ENSR00000318824	5	177498801	177504801
BRCA	ENSR00000191397	5	177500165	177506165
BRCA	ENSR00000318825	5	177500201	177506201
BRCA	ENSR00000319047	6	353900	359900
BRCA	ENSR00000191818	6	353981	359981
BRCA	ENSR00000192350	6	4008183	4014183
BRCA	6:18738595-18744595	6	18738826	18744826
BRCA	ENSR00000195012	6	26257895	26263895
BRCA	ENSR00000195227	6	28384991	28390991
BRCA	ENSR00000320151	6	29846577	29852577
BRCA	ENSR00000320173	6	30241877	30247877
BRCA	ENSR00000320642	6	42164438	42170438
BRCA	ENSR00000196948	6	42165138	42171138
BRCA	ENSR00000321549	6	77583417	77589417
BRCA	ENSR00000199718	6	86377018	86383018
BRCA	ENSR00000200931	6	109490750	109496750
BRCA	ENSR00000201430	6	113490802	113496802
BRCA	ENSR00000205037	6	149814933	149820933
BRCA	ENSR00000205038	6	149817336	149823336
BRCA	ENSR00000205309	6	151718848	151724848
BRCA	ENSR00000324129	6	165198108	165204113
BRCA	ENSR00000324218	6	167375788	167381788
BRCA	ENSR00000324220	6	167400288	167406288
BRCA	ENSR00000206898	6	167400289	167406289
BRCA	ENSR00000324472	7	1184036	1190036
BRCA	ENSR00000208876	7	17090987	17096987
BRCA	7:17052139-17058139	7	17091763	17097763
BRCA	ENSR00000208877	7	17092382	17098382
BRCA	ENSR00000208878	7	17093404	17099404
BRCA	ENSR00000325900	7	42422799	42428799
BRCA	ENSR00000212833	7	64404978	64410978
BRCA	ENSR00000326458	7	64408778	64414778
BRCA	ENSR00000326489	7	64957613	64963613
BRCA	ENSR00000326490	7	64959813	64965813
BRCA	ENSR00000213403	7	72443311	72449310
BRCA	ENSR00000326716	7	72535524	72541524
BRCA	ENSR00000213408	7	72535624	72541624
BRCA	ENSR00000326719	7	72695817	72701802
BRCA	ENSR00000213692	7	74288096	74294099
BRCA	ENSR00000213745	7	74681025	74687049
BRCA	ENSR00000326779	7	74681225	74687249
BRCA	ENSR00000216272	7	104627231	104633231
BRCA	ENSR00000216273	7	104631151	104637151
BRCA	ENSR00000216522	7	106548860	106554860
BRCA	ENSR00000216845	7	111992678	111998678
BRCA	ENSR00000218550	7	134857999	134863999
BRCA	ENSR00000218551	7	134859138	134865138
BRCA	ENSR00000218789	7	137533340	137539340
BRCA	ENSR00000328842	7	143305893	143311893
BRCA	ENSR00000328875	7	144025693	144031693
BRCA	ENSR00000219466	7	144025755	144031755
BRCA	ENSR00000329061	7	150454588	150460588
BRCA	ENSR00000329454	8	251500	257500
BRCA	ENSR00000329966	8	12406909	12412909
BRCA	ENSR00000329967	8	12409709	12415709
BRCA	ENSR00000330508	8	29454016	29460016
BRCA	ENSR00000330509	8	29455216	29461216
BRCA	8:38217049-38223049	8	38074567	38080567
BRCA	ENSR00000223858	8	40177919	40183919
BRCA	ENSR00000225034	8	60878672	60884672
BRCA	ENSR00000226752	8	90713651	90719651
BRCA	ENSR00000226753	8	90714440	90720440
BRCA	ENSR00000226793	8	90905460	90911460
BRCA	ENSR00000228046	8	102183061	102189061
BRCA	ENSR00000228089	8	102483529	102489529
BRCA	ENSR00000228962	8	116855926	116861926
BRCA	ENSR00000332994	8	117306738	117312738
BRCA	8:121142126-121148126	8	122154366	122160366
BRCA	ENSR00000230605	8	128909146	128915146
BRCA	ENSR00000230634	8	129028003	129034003
BRCA	ENSR00000333895	8	143725781	143731784
BRCA	ENSR00000232018	8	144106717	144112717
BRCA	ENSR00000333924	8	144107817	144113817
BRCA	ENSR00000232019	8	144107858	144113858
BRCA	8:143028397-143034397	8	144109814	144115814
BRCA	ENSR00000333965	8	144829670	144835670
BRCA	ENSR00000333966	8	144831270	144837270
BRCA	ENSR00000333971	8	144927672	144933672
BRCA	ENSR00000232164	8	144973868	144979868
BRCA	ENSR00000333975	8	144973968	144979968
BRCA	ENSR00000232852	9	5575540	5581540
BRCA	ENSR00000232853	9	5577060	5583060
BRCA	ENSR00000335037	9	36678697	36684697
BRCA	ENSR00000235397	9	42246795	42252742
BRCA	ENSR00000335771	9	42251842	42257623
BRCA	ENSR00000335517	9	66485324	66491324
BRCA	ENSR00000236796	9	85682372	85688372
BRCA	ENSR00000238324	9	98567382	98573382
BRCA	ENSR00000336877	9	99072782	99078782
BRCA	ENSR00000238462	9	99648072	99654072
BRCA	ENSR00000239940	9	114963051	114969051
BRCA	ENSR00000239941	9	114965190	114971190
BRCA	ENSR00000337840	9	129358479	129364479
BRCA	ENSR00000337993	9	134435187	134441187
BRCA	ENSR00000338188	9	138808246	138814246
BRCA	ENSR00000243144	9	140020252	140026252
BRCA	ENSR00000243859	X	2578586	2584586
BRCA	ENSR00000243860	X	2579801	2585801
BRCA	ENSR00000243861	X	2581723	2587723
BRCA	ENSR00000243869	X	2660790	2666790
BRCA	ENSR00000243983	X	3727241	3733241
BRCA	ENSR00000339530	X	3727241	3733241
BRCA	ENSR00000339888	X	16612223	16618223
BRCA	ENSR00000244845	X	16619724	16625724
BRCA	ENSR00000339893	X	16980823	16986823
BRCA	ENSR00000244886	X	16982093	16988093
BRCA	ENSR00000339894	X	16984523	16990523
BRCA	ENSR00000246413	X	47363613	47369613
BRCA	ENSR00000340736	X	47760599	47766599
BRCA	ENSR00000246721	X	53954379	53960379
BRCA	ENSR00000246727	X	54202333	54208333
BRCA	ENSR00000341179	X	57102433	57108433
BRCA	ENSR00000246820	X	57924591	57930591
BRCA	ENSR00000247261	X	73469335	73475335
BRCA	ENSR00000247300	X	75400653	75406653
BRCA	ENSR00000341824	X	75407635	75413638
BRCA	ENSR00000341825	X	75412538	75418536
BRCA	ENSR00000342021	X	80936999	80942999
BRCA	ENSR00000248296	X	117935316	117941316
BRCA	ENSR00000343138	X	117936163	117942163
BRCA	ENSR00000248297	X	117938412	117944412
BRCA	ENSR00000343139	X	117938563	117944563
BRCA	ENSR00000249159	X	138799508	138805508
CESC	ENSR00000000139	1	1061448	1067448
CESC	ENSR00000000140	1	1062725	1068725
CESC	1:16181942-16187942	1	16508437	16514437
CESC	ENSR00000250663	1	21710993	21716993
CESC	ENSR00000002741	1	21713475	21719475
CESC	ENSR00000250728	1	23677893	23683893
CESC	ENSR00000003132	1	24354636	24360636
CESC	ENSR00000250751	1	24355890	24361890
CESC	ENSR00000251119	1	33963400	33969400
CESC	ENSR00000004535	1	33964573	33970573
CESC	ENSR00000251120	1	33964600	33970600
CESC	ENSR00000005549	1	43531062	43537062
CESC	ENSR00000005550	1	43532471	43538471
CESC	ENSR00000005553	1	43600563	43606563
CESC	ENSR00000251495	1	43602971	43608971
CESC	1:51006793-51012793	1	51472465	51478465
CESC	1:51007228-51013228	1	51472900	51478900
CESC	ENSR00000007157	1	59281014	59287014
CESC	1:67399291-67405291	1	67864974	67870974
CESC	1:68389649-68395649	1	68855332	68861332
CESC	ENSR00000010575	1	100166956	100172956
CESC	ENSR00000253250	1	100722256	100728256
CESC	ENSR00000010969	1	109073571	109079571
CESC	ENSR00000253442	1	109076222	109082222
CESC	ENSR00000010970	1	109077787	109083787
CESC	ENSR00000011610	1	114231890	114237890
CESC	ENSR00000253688	1	115102521	115108521
CESC	ENSR00000011702	1	115102948	115108948
CESC	ENSR00000012140	1	118378770	118384770
CESC	ENSR00000253851	1	118382622	118388622
CESC	ENSR00000012237	1	119698832	119704832
CESC	ENSR00000012238	1	119700364	119706364
CESC	ENSR00000012442	1	144600793	144606794
CESC	ENSR00000012443	1	144601715	144607715
CESC	ENSR00000012444	1	144603065	144609065
CESC	ENSR00000013533	1	150604854	150610854
CESC	ENSR00000254407	1	151569476	151575476
CESC	ENSR00000013685	1	151827898	151833898
CESC	ENSR00000013808	1	153542276	153548276
CESC	ENSR00000254547	1	153544276	153550276
CESC	1:153574259-153580259	1	153546735	153552735
CESC	ENSR00000013809	1	153548161	153554161
CESC	ENSR00000013810	1	153548576	153554576
CESC	ENSR00000254548	1	153552076	153558076
CESC	ENSR00000013811	1	153567976	153573976
CESC	ENSR00000254583	1	154647276	154653276
CESC	ENSR00000014087	1	155537215	155543215
CESC	ENSR00000254867	1	160352790	160358790
CESC	ENSR00000014617	1	160957126	160963126
CESC	ENSR00000254910	1	160957290	160963290
CESC	ENSR00000017505	1	193226678	193232678
CESC	ENSR00000017506	1	193227301	193233301
CESC	ENSR00000017507	1	193230749	193236749
CESC	ENSR00000019373	1	209625594	209631594
CESC	ENSR00000019374	1	209626166	209632166
CESC	ENSR00000019951	1	214840637	214846637
CESC	ENSR00000256788	1	220633842	220639842
CESC	ENSR00000020649	1	222723430	222729430
CESC	1:223100353-223106353	1	223273695	223279695
CESC	ENSR00000021072	1	226295561	226301561
CESC	ENSR00000257014	1	226300301	226306301
CESC	ENSR00000021608	1	230737687	230743687
CESC	ENSR00000022209	1	235183847	235189847
CESC	ENSR00000022210	1	235185022	235191022
CESC	ENSR00000257439	1	236650400	236656400
CESC	ENSR00000022369	1	236650456	236656456
CESC	ENSR00000022370	1	236651272	236657272
CESC	ENSR00000022371	1	236652234	236658234
CESC	ENSR00000023842	10	5523393	5529393
CESC	10:5484083-5490083	10	5526046	5532046
CESC	ENSR00000023843	10	5527639	5533639
CESC	ENSR00000258015	10	5642463	5648463
CESC	ENSR00000258386	10	17668699	17674699
CESC	ENSR00000026020	10	29179306	29185306
CESC	10:29425732-29431732	10	29714661	29720661
CESC	ENSR00000258722	10	29715729	29721729
CESC	ENSR00000258819	10	32255528	32261528
CESC	ENSR00000026484	10	32255992	32261992
CESC	ENSR00000027724	10	47122077	47128076
CESC	ENSR00000027558	10	47122116	47128116
CESC	ENSR00000027726	10	47126616	47132616
CESC	10:46408840-46414840	10	47134908	47140910
CESC	ENSR00000027731	10	49209911	49215901
CESC	ENSR00000259488	10	50638546	50644546
CESC	ENSR00000260157	10	73703658	73709658
CESC	10:72300867-72306867	10	74060625	74066625
CESC	ENSR00000031041	10	88963857	88969857
CESC	ENSR00000031042	10	88968758	88974758
CESC	ENSR00000031043	10	88970957	88976957
CESC	ENSR00000260651	10	88971457	88977457
CESC	ENSR00000260944	10	97925456	97931456
CESC	ENSR00000338303	11	123774	131217
CESC	ENSR00000243306	11	125330	136193
CESC	ENSR00000243305	11	127523	138368
CESC	ENSR00000035643	11	512389	518389
CESC	ENSR00000262415	11	2225830	2231830
CESC	ENSR00000035913	11	2227146	2233146
CESC	ENSR00000262508	11	3492030	3498030
CESC	ENSR00000262509	11	3494630	3500630
CESC	ENSR00000037151	11	13013817	13019817
CESC	ENSR00000262893	11	13035147	13041147
CESC	11:13020899-13026899	11	13042446	13048446
CESC	ENSR00000038731	11	34683853	34689853
CESC	ENSR00000263612	11	36501150	36507150
CESC	ENSR00000263774	11	43879550	43885550
CESC	ENSR00000039212	11	43885284	43891284
CESC	ENSR00000039213	11	43887650	43893650
CESC	ENSR00000263789	11	44271550	44277550
CESC	ENSR00000264041	11	56850275	56856275
CESC	ENSR00000040210	11	60930972	60936972
CESC	ENSR00000264246	11	60931272	60937272
CESC	ENSR00000040211	11	60932045	60938045
CESC	ENSR00000040212	11	60933262	60939262
CESC	ENSR00000264247	11	60933872	60939872
CESC	ENSR00000264543	11	67609971	67615971
CESC	ENSR00000264544	11	67612571	67618571
CESC	ENSR00000041357	11	69194168	69200168
CESC	ENSR00000041438	11	69712567	69718540
CESC	ENSR00000264768	11	71454646	71460646
CESC	ENSR00000264769	11	71457046	71463046
CESC	ENSR00000042528	11	77792731	77798731
CESC	ENSR00000043149	11	87834754	87840754
CESC	ENSR00000043150	11	87837088	87843088
CESC	ENSR00000266160	11	119448211	119454211
CESC	ENSR00000047484	12	79173	85173
CESC	ENSR00000050146	12	27583297	27589297
CESC	ENSR00000051396	12	47778990	47784990
CESC	ENSR00000052474	12	56462655	56468655
CESC	ENSR00000053382	12	66394438	66400438
CESC	13:22881603-22887603	13	23455742	23461742
CESC	ENSR00000060693	13	31406817	31412817
CESC	ENSR00000271434	13	31411637	31417637
CESC	ENSR00000060694	13	31412464	31418464
CESC	ENSR00000271728	13	41441236	41447236
CESC	ENSR00000062792	13	50526239	50532239
CESC	ENSR00000063633	13	73833135	73839135
CESC	ENSR00000063641	13	73913237	73919237
CESC	ENSR00000272479	13	73948237	73954237
CESC	ENSR00000272481	13	73988337	73994337
CESC	ENSR00000063651	13	74021933	74027933
CESC	ENSR00000063652	13	74022701	74028701
CESC	ENSR00000272484	13	74024537	74030537
CESC	ENSR00000272486	13	74145737	74151737
CESC	13:76589783-76595783	13	77163918	77169918
CESC	ENSR00000065658	13	109914387	109920387
CESC	ENSR00000065683	13	110071754	110077754
CESC	ENSR00000065684	13	110073547	110079547
CESC	ENSR00000273268	13	110073547	110079547
CESC	ENSR00000065685	13	110076655	110082655
CESC	ENSR00000066766	14	24050055	24056055
CESC	ENSR00000273758	14	24050509	24056509
CESC	ENSR00000273807	14	24939706	24945706
CESC	ENSR00000274076	14	35505106	35511106
CESC	ENSR00000067675	14	36280835	36286835
CESC	ENSR00000274092	14	36280906	36286906
CESC	ENSR00000068090	14	50493906	50499906
CESC	14:50028128-50034128	14	50494846	50500846
CESC	ENSR00000068091	14	50495519	50501519
CESC	ENSR00000073523	14	103724137	103730137
CESC	14:105033430-105039430	14	105499767	105505767
CESC	14:105069641-105075641	14	105535978	105541978
CESC	ENSR00000074563	15	32756201	32762201
CESC	ENSR00000074564	15	32758401	32764401
CESC	ENSR00000074565	15	32759501	32765501
CESC	ENSR00000075512	15	40687702	40693702
CESC	ENSR00000075569	15	41151441	41157441
CESC	ENSR00000076776	15	53719537	53725537
CESC	ENSR00000277845	15	62447499	62453499
CESC	15:72322062-72328062	15	72614403	72620403
CESC	ENSR00000080396	15	82972454	82978444
CESC	ENSR00000080397	15	82975594	82981587
CESC	ENSR00000080313	15	84031152	84037152
CESC	ENSR00000080840	15	89473022	89479022
CESC	ENSR00000278894	15	89474731	89480731
CESC	ENSR00000081806	15	99958693	99964693
CESC	ENSR00000279289	15	100918605	100924605
CESC	ENSR00000081902	15	100932155	100938155
CESC	ENSR00000082399	16	1953965	1959965
CESC	ENSR00000280227	16	28383621	28389621
CESC	ENSR00000084886	16	28383732	28389732
CESC	ENSR00000085229	16	30643021	30649021
CESC	ENSR00000088030	16	75623198	75629198
CESC	ENSR00000282076	17	1590494	1596494
CESC	ENSR00000282517	17	14131417	14137417
CESC	ENSR00000091521	17	14131745	14137745
CESC	ENSR00000091626	17	15331817	15337817
CESC	ENSR00000092461	17	21179112	21185112
CESC	ENSR00000282764	17	21180512	21186512
CESC	ENSR00000092462	17	21180538	21186538
CESC	ENSR00000093940	17	37727053	37733053
CESC	17:43340887-43346887	17	41418255	41424255
CESC	ENSR00000094946	17	43573790	43579790
CESC	ENSR00000094947	17	43575166	43581166
CESC	ENSR00000283527	17	43575966	43581966
CESC	ENSR00000099470	17	79695345	79701345
CESC	ENSR00000099471	17	79696656	79702656
CESC	ENSR00000284719	17	79697830	79703830
CESC	ENSR00000099472	17	79697930	79703930
CESC	ENSR00000099473	17	79699832	79705832
CESC	ENSR00000286047	18	47077070	47083070
CESC	ENSR00000104450	18	60725734	60731734
CESC	ENSR00000104451	18	60726676	60732676
CESC	ENSR00000104452	18	60727486	60733486
CESC	ENSR00000104535	18	61236247	61242247
CESC	ENSR00000105344	18	77324686	77330686
CESC	ENSR00000287159	19	5545011	5551011
CESC	ENSR00000106385	19	5545072	5551072
CESC	19:9742459-9748459	19	9853135	9859135
CESC	ENSR00000287548	19	13948914	13954914
CESC	ENSR00000288220	19	36060702	36066702
CESC	ENSR00000288221	19	36062202	36068202
CESC	19:36154578-36160578	19	36645480	36651480
CESC	ENSR00000288311	19	39344040	39350040
CESC	ENSR00000109335	19	39345235	39351235
CESC	ENSR00000109507	19	40817798	40823798
CESC	ENSR00000288414	19	41467505	41473505
CESC	ENSR00000288415	19	41469905	41475905
CESC	ENSR00000288416	19	41470905	41476905
CESC	ENSR00000112643	2	9890581	9896581
CESC	ENSR00000113008	2	12161438	12167438
CESC	ENSR00000113728	2	20290661	20296661
CESC	ENSR00000113746	2	20379418	20385418
CESC	ENSR00000113747	2	20380061	20386061
CESC	ENSR00000113748	2	20382261	20388261
CESC	ENSR00000115040	2	33138492	33144492
CESC	ENSR00000115682	2	39704048	39710048
CESC	ENSR00000115689	2	39719241	39725241
CESC	ENSR00000115690	2	39721744	39727744
CESC	2:46627448-46633448	2	46854587	46860587
CESC	ENSR00000116671	2	46856693	46862693
CESC	ENSR00000290783	2	46856739	46862739
CESC	ENSR00000118753	2	71308030	71314030
CESC	ENSR00000119748	2	86723132	86729132
CESC	ENSR00000292392	2	97935537	97941537
CESC	ENSR00000123167	2	132266319	132272319
CESC	ENSR00000294778	2	174389428	174395428
CESC	ENSR00000294779	2	174394428	174400428
CESC	ENSR00000127898	2	191618018	191624018
CESC	ENSR00000295441	2	197682924	197688924
CESC	ENSR00000128358	2	197683110	197689110
CESC	2:196818845-196824845	2	197683569	197689569
CESC	ENSR00000128359	2	197685696	197691696
CESC	ENSR00000129352	2	207659724	207665724
CESC	ENSR00000130451	2	219622392	219628392
CESC	ENSR00000130536	2	220230820	220236820
CESC	ENSR00000133396	20	287645	293645
CESC	ENSR00000133397	20	291770	297770
CESC	20:337919-343919	20	318563	324563
CESC	ENSR00000133401	20	319345	325345
CESC	ENSR00000297000	20	319944	325944
CESC	20:3176120-3182120	20	3156766	3162766
CESC	ENSR00000297153	20	4009847	4015847
CESC	ENSR00000133854	20	4011947	4017947
CESC	20:4033170-4039170	20	4013817	4019817
CESC	20:19748082-19754082	20	19728726	19734726
CESC	ENSR00000135335	20	19728744	19734744
CESC	ENSR00000136292	20	32281412	32287412
CESC	ENSR00000136293	20	32282072	32288072
CESC	ENSR00000136365	20	32717984	32723984
CESC	ENSR00000298227	20	32720106	32726106
CESC	ENSR00000137004	20	37086043	37092043
CESC	20:45237957-45243957	20	43866598	43872598
CESC	ENSR00000298756	20	46684543	46690543
CESC	ENSR00000299273	20	60945656	60951656
CESC	ENSR00000139708	20	60948756	60954756
CESC	ENSR00000299617	21	10489928	10495928
CESC	ENSR00000140270	21	10489964	10495964
CESC	ENSR00000299618	21	10492228	10498228
CESC	ENSR00000140538	21	17902330	17908330
CESC	ENSR00000140824	21	27601957	27607957
CESC	ENSR00000140825	21	27605820	27611820
CESC	ENSR00000141543	21	34733606	34739606
CESC	ENSR00000142604	21	43077675	43083675
CESC	ENSR00000142605	21	43081969	43087969
CESC	ENSR00000142606	21	43083906	43089906
CESC	ENSR00000142607	21	43091315	43097315
CESC	ENSR00000142710	21	43719410	43725410
CESC	ENSR00000144311	22	24250281	24256281
CESC	ENSR00000144853	22	28323454	28329454
CESC	ENSR00000145621	22	35062206	35068205
CESC	22:34672624-34678624	22	35068615	35074615
CESC	ENSR00000146067	22	38176875	38182875
CESC	ENSR00000301860	22	38179707	38185707
CESC	ENSR00000146558	22	41134330	41140330
CESC	ENSR00000301957	22	41138904	41144904
CESC	ENSR00000146688	22	42324952	42330952
CESC	ENSR00000146803	22	43073706	43079706
CESC	ENSR00000146804	22	43075607	43081607
CESC	ENSR00000146805	22	43077106	43083106
CESC	ENSR00000146806	22	43080806	43086806
CESC	ENSR00000302514	3	8478386	8484386
CESC	ENSR00000302515	3	8480786	8486786
CESC	3:15651471-15657471	3	15692978	15698978
CESC	3:31646637-31652637	3	31688129	31694129
CESC	ENSR00000304730	3	75730951	75736951
CESC	ENSR00000304731	3	75734051	75740051
CESC	ENSR00000155785	3	101406977	101412977
CESC	ENSR00000155786	3	101409632	101415632
CESC	ENSR00000305256	3	101409644	101415644
CESC	ENSR00000155787	3	101411805	101417805
CESC	ENSR00000305257	3	101411844	101417844
CESC	ENSR00000157923	3	126780922	126786922
CESC	ENSR00000157924	3	126781728	126787728
CESC	ENSR00000158153	3	128539664	128545664
CESC	ENSR00000306140	3	129079743	129085743
CESC	ENSR00000306266	3	132088244	132094244
CESC	ENSR00000306432	3	136734142	136740142
CESC	ENSR00000307119	3	156893789	156899789
CESC	ENSR00000162305	3	177136398	177142398
CESC	ENSR00000162306	3	177139488	177145488
CESC	ENSR00000163136	3	185701020	185707020
CESC	ENSR00000307921	3	186578789	186584789
CESC	ENSR00000163249	3	186580603	186586603
CESC	ENSR00000307922	3	186581989	186587989
CESC	ENSR00000163250	3	186584515	186590515
CESC	ENSR00000307963	3	187547188	187553188
CESC	ENSR00000163654	3	189107889	189113889
CESC	3:189390778-189396778	3	189108567	189114567
CESC	3:189391648-189397648	3	189109437	189115437
CESC	3:189933342-189939342	3	189651131	189657131
CESC	ENSR00000163698	3	189652589	189658589
CESC	ENSR00000163699	3	189656590	189662590
CESC	ENSR00000163984	3	193537857	193543857
CESC	ENSR00000163985	3	193541389	193547389
CESC	ENSR00000163986	3	193542879	193548879
CESC	ENSR00000163987	3	193544689	193550689
CESC	ENSR00000308163	3	194033989	194039989
CESC	ENSR00000164079	3	194035738	194041738
CESC	ENSR00000164117	3	194240546	194246546
CESC	ENSR00000164366	3	195889571	195895571
CESC	ENSR00000308258	3	196697371	196703371
CESC	ENSR00000308259	3	196702671	196708671
CESC	ENSR00000164478	3	196702814	196708814
CESC	ENSR00000164479	3	196703571	196709571
CESC	ENSR00000308331	4	162289	168289
CESC	ENSR00000164707	4	766606	772606
CESC	ENSR00000165933	4	11438652	11444652
CESC	ENSR00000309103	4	17791623	17797623
CESC	ENSR00000167396	4	37873921	37879921
CESC	ENSR00000309925	4	53528967	53534967
CESC	ENSR00000310566	4	77834653	77840653
CESC	ENSR00000310568	4	77859053	77865053
CESC	ENSR00000169560	4	77861513	77867513
CESC	ENSR00000169561	4	77862060	77868060
CESC	ENSR00000170061	4	84001954	84007954
CESC	ENSR00000173220	4	129174859	129180859
CESC	ENSR00000173221	4	129178271	129184271
CESC	ENSR00000313236	4	177259451	177265451
CESC	ENSR00000313237	4	177261951	177267951
CESC	ENSR00000313273	4	178580954	178586954
CESC	ENSR00000313345	4	183730053	183736053
CESC	ENSR00000313383	4	184712053	184718053
CESC	ENSR00000313384	4	184737353	184743353
CESC	ENSR00000177388	5	260677	266677
CESC	ENSR00000313719	5	1346415	1352415
CESC	5:1562421-1568421	5	1562536	1568536
CESC	ENSR00000314177	5	21467109	21473109
CESC	ENSR00000179201	5	33431170	33437170
CESC	ENSR00000314379	5	33433106	33439106
CESC	ENSR00000179202	5	33433107	33439107
CESC	5:37099086-37105086	5	37099188	37105188
CESC	ENSR00000314722	5	42976802	42982802
CESC	5:42996597-43002597	5	42996699	43002699
CESC	5:43048497-43054497	5	43048599	43054599
CESC	ENSR00000315325	5	64793227	64799227
CESC	ENSR00000182804	5	76104214	76110214
CESC	ENSR00000315700	5	76104825	76110825
CESC	ENSR00000182805	5	76107325	76113325
CESC	ENSR00000186034	5	122556790	122562790
CESC	ENSR00000186035	5	122559039	122565039
CESC	5:138939407-138945407	5	138275096	138281096
CESC	ENSR00000187665	5	138888652	138894652
CESC	ENSR00000317500	5	138889585	138895585
CESC	ENSR00000187666	5	138890285	138896285
CESC	ENSR00000317501	5	138890485	138896485
CESC	ENSR00000188681	5	148219596	148225596
CESC	ENSR00000188682	5	148220463	148226463
CESC	ENSR00000188847	5	149042746	149048746
CESC	ENSR00000188848	5	149044063	149050063
CESC	ENSR00000317885	5	149044463	149050463
CESC	ENSR00000317886	5	149045563	149051563
CESC	ENSR00000317887	5	149048063	149054063
CESC	ENSR00000189170	5	151106348	151112348
CESC	ENSR00000317983	5	151106461	151112461
CESC	ENSR00000318752	5	175857501	175863501
CESC	ENSR00000318784	5	176742001	176748001
CESC	ENSR00000191318	5	176742096	176748096
CESC	ENSR00000319047	6	353900	359900
CESC	ENSR00000191818	6	353981	359981
CESC	ENSR00000191916	6	1283836	1289836
CESC	ENSR00000195012	6	26257895	26263895
CESC	ENSR00000195085	6	27061820	27067820
CESC	ENSR00000195227	6	28384991	28390991
CESC	ENSR00000320173	6	30241877	30247877
CESC	ENSR00000320213	6	31032377	31038377
CESC	ENSR00000320214	6	31033777	31039777
CESC	ENSR00000195487	6	31033847	31039847
CESC	ENSR00000195608	6	31816411	31822411
CESC	ENSR00000320261	6	31817577	31823577
CESC	ENSR00000320403	6	34750977	34756977
CESC	ENSR00000320404	6	34751677	34757677
CESC	ENSR00000321433	6	74021723	74027723
CESC	ENSR00000199718	6	86377018	86383018
CESC	ENSR00000200931	6	109490750	109496750
CESC	ENSR00000201430	6	113490802	113496802
CESC	ENSR00000323635	6	148495836	148501836
CESC	ENSR00000323636	6	148497736	148503736
CESC	ENSR00000204783	6	148498061	148504061
CESC	ENSR00000205037	6	149814933	149820933
CESC	ENSR00000205038	6	149817336	149823336
CESC	ENSR00000205309	6	151718848	151724848
CESC	ENSR00000324031	6	161208132	161214132
CESC	ENSR00000206389	6	161208532	161214532
CESC	ENSR00000206390	6	161210300	161216300
CESC	ENSR00000324218	6	167375788	167381788
CESC	6:166979007-166985007	6	167392495	167398495
CESC	ENSR00000324472	7	1184036	1190036
CESC	ENSR00000207995	7	4658199	4664199
CESC	ENSR00000324642	7	4659631	4665631
CESC	ENSR00000207996	7	4668531	4674531
CESC	ENSR00000207997	7	4669831	4675831
CESC	ENSR00000326477	7	64723821	64729695
CESC	ENSR00000212882	7	65184421	65190421
CESC	ENSR00000326525	7	65184473	65190473
CESC	ENSR00000213403	7	72443311	72449310
CESC	ENSR00000326719	7	72695817	72701802
CESC	ENSR00000213692	7	74288096	74294099
CESC	ENSR00000326801	7	75935517	75941517
CESC	ENSR00000216272	7	104627231	104633231
CESC	ENSR00000216845	7	111992678	111998678
CESC	ENSR00000328274	7	127929353	127935353
CESC	ENSR00000328302	7	128536653	128542653
CESC	ENSR00000218550	7	134857999	134863999
CESC	ENSR00000218551	7	134859138	134865138
CESC	ENSR00000328842	7	143305893	143311893
CESC	ENSR00000328996	7	149234591	149240591
CESC	ENSR00000328997	7	149235891	149241891
CESC	ENSR00000329321	7	157078794	157084794
CESC	ENSR00000329454	8	251500	257500
CESC	ENSR00000329754	8	8032122	8038122
CESC	ENSR00000329755	8	8034822	8040822
CESC	ENSR00000220688	8	8034989	8040989
CESC	ENSR00000221178	8	12339705	12345705
CESC	ENSR00000329960	8	12340009	12346009
CESC	ENSR00000329961	8	12342509	12348509
CESC	ENSR00000329963	8	12359809	12365809
CESC	8:38217049-38223049	8	38074567	38080567
CESC	ENSR00000331878	8	79761335	79767335
CESC	ENSR00000226137	8	79761625	79767625
CESC	ENSR00000226414	8	82198535	82204535
CESC	ENSR00000226752	8	90713651	90719651
CESC	ENSR00000226753	8	90714440	90720440
CESC	ENSR00000228046	8	102183061	102189061
CESC	ENSR00000228089	8	102483529	102489529
CESC	ENSR00000230605	8	128909146	128915146
CESC	ENSR00000230874	8	130698774	130704774
CESC	8:129687233-129693233	8	130699479	130705479
CESC	ENSR00000230875	8	130700378	130706378
CESC	ENSR00000230876	8	130702141	130708141
CESC	ENSR00000230877	8	130706546	130712546
CESC	ENSR00000230878	8	130707403	130713403
CESC	8:129701220-129707220	8	130713466	130719466
CESC	ENSR00000231303	8	134372601	134378601
CESC	ENSR00000333904	8	143895016	143901016
CESC	ENSR00000232018	8	144106717	144112717
CESC	ENSR00000333924	8	144107817	144113817
CESC	ENSR00000232019	8	144107858	144113858
CESC	8:143028397-143034397	8	144109814	144115814
CESC	ENSR00000333965	8	144829670	144835670
CESC	ENSR00000333966	8	144831270	144837270
CESC	ENSR00000333971	8	144927672	144933672
CESC	ENSR00000232320	9	18494	24494
CESC	9:5443093-5449093	9	5443093	5449093
CESC	ENSR00000232852	9	5575540	5581540
CESC	ENSR00000232853	9	5577060	5583060
CESC	ENSR00000232897	9	6035000	6041000
CESC	ENSR00000234479	9	34136898	34142898
CESC	ENSR00000335037	9	36678697	36684697
CESC	ENSR00000335113	9	39064697	39070697
CESC	ENSR00000235397	9	42246795	42252742
CESC	ENSR00000335771	9	42251842	42257623
CESC	ENSR00000236796	9	85682372	85688372
CESC	ENSR00000237312	9	90365454	90371454
CESC	ENSR00000336428	9	90365615	90371615
CESC	ENSR00000336429	9	90371315	90377315
CESC	ENSR00000336446	9	90649115	90655115
CESC	ENSR00000238324	9	98567382	98573382
CESC	ENSR00000238462	9	99648072	99654072
CESC	ENSR00000337027	9	103152082	103158082
CESC	ENSR00000239940	9	114963051	114969051
CESC	ENSR00000239941	9	114965190	114971190
CESC	ENSR00000337777	9	127206279	127212279
CESC	ENSR00000241287	9	127206324	127212324
CESC	ENSR00000337904	9	131539179	131545179
CESC	9:128778410-128784410	9	131540689	131546689
CESC	ENSR00000337905	9	131541179	131547179
CESC	ENSR00000337906	9	131541779	131547779
CESC	ENSR00000338188	9	138808246	138814246
CESC	ENSR00000242932	9	138814004	138820004
CESC	ENSR00000242933	9	138814625	138820625
CESC	ENSR00000242934	9	138815820	138821820
CESC	ENSR00000243038	9	139467853	139473853
CESC	ENSR00000243144	9	140020252	140026252
CESC	X:1358946-1364946	X	1477839	1483839
CESC	ENSR00000243859	X	2578586	2584586
CESC	ENSR00000243860	X	2579801	2585801
CESC	ENSR00000243861	X	2581723	2587723
CESC	ENSR00000243869	X	2660790	2666790
CESC	ENSR00000243982	X	3726744	3732744
CESC	ENSR00000243983	X	3727241	3733241
CESC	ENSR00000339530	X	3727241	3733241
CESC	ENSR00000339537	X	4462441	4468441
CESC	ENSR00000340671	X	46131935	46137935
CESC	ENSR00000246311	X	46135835	46141835
CESC	ENSR00000246413	X	47363613	47369613
CESC	ENSR00000246721	X	53954379	53960379
CESC	ENSR00000246727	X	54202333	54208333
CESC	ENSR00000341740	X	73412335	73418335
CESC	ENSR00000247300	X	75400653	75406653
CESC	ENSR00000341824	X	75407635	75413638
CESC	ENSR00000341825	X	75412538	75418536
CESC	ENSR00000247402	X	80255599	80261599
CESC	ENSR00000342021	X	80936999	80942999
CESC	ENSR00000247597	X	100246990	100252990
CESC	ENSR00000247853	X	106895331	106901331
CESC	ENSR00000248296	X	117935316	117941316
CESC	ENSR00000249159	X	138799508	138805508
CHOL	ENSR00000000137	1	1054991	1060991
CHOL	ENSR00000000138	1	1057427	1063427
CHOL	1:31445488-31451488	1	31918335	31924335
CHOL	ENSR00000251054	1	31926247	31932247
CHOL	ENSR00000251119	1	33963400	33969400
CHOL	ENSR00000004535	1	33964573	33970573
CHOL	ENSR00000251120	1	33964600	33970600
CHOL	1:39047635-39053635	1	39513307	39519307
CHOL	1:39612499-39618499	1	40078171	40084171
CHOL	ENSR00000006420	1	53139355	53145355
CHOL	ENSR00000006421	1	53141883	53147883
CHOL	ENSR00000006992	1	56952552	56958552
CHOL	ENSR00000007814	1	64657937	64663937
CHOL	ENSR00000009091	1	84748970	84754970
CHOL	ENSR00000252733	1	84750383	84756383
CHOL	ENSR00000252734	1	84751383	84757383
CHOL	ENSR00000010575	1	100166956	100172956
CHOL	ENSR00000253250	1	100722256	100728256
CHOL	ENSR00000011610	1	114231890	114237890
CHOL	ENSR00000011925	1	117024923	117030923
CHOL	ENSR00000253778	1	117025022	117031022
CHOL	ENSR00000011926	1	117026247	117032247
CHOL	1:116485310-116491310	1	117027932	117033932
CHOL	ENSR00000012140	1	118378770	118384770
CHOL	ENSR00000253851	1	118382622	118388622
CHOL	ENSR00000253852	1	118384922	118390922
CHOL	ENSR00000012237	1	119698832	119704832
CHOL	ENSR00000012238	1	119700364	119706364
CHOL	ENSR00000012243	1	119794109	119800109
CHOL	ENSR00000012260	1	119881199	119887199
CHOL	ENSR00000012442	1	144600793	144606794
CHOL	ENSR00000012443	1	144601715	144607715
CHOL	ENSR00000012444	1	144603065	144609065
CHOL	ENSR00000012851	1	149661697	149667692
CHOL	ENSR00000013516	1	150513277	150519277
CHOL	ENSR00000013524	1	150565776	150571776
CHOL	ENSR00000013533	1	150604854	150610854
CHOL	ENSR00000013685	1	151827898	151833898
CHOL	ENSR00000014087	1	155537215	155543215
CHOL	ENSR00000254829	1	159571090	159577090
CHOL	ENSR00000014617	1	160957126	160963126
CHOL	ENSR00000254910	1	160957290	160963290
CHOL	ENSR00000015371	1	168422158	168428158
CHOL	ENSR00000015372	1	168423719	168429719
CHOL	ENSR00000017505	1	193226678	193232678
CHOL	ENSR00000017506	1	193227301	193233301
CHOL	ENSR00000017507	1	193230749	193236749
CHOL	ENSR00000020649	1	222723430	222729430
CHOL	ENSR00000021066	1	226236265	226242265
CHOL	ENSR00000021708	1	231492054	231498054
CHOL	ENSR00000022209	1	235183847	235189847
CHOL	ENSR00000022210	1	235185022	235191022
CHOL	ENSR00000023751	10	4794664	4800664
CHOL	ENSR00000257991	10	5262063	5268063
CHOL	ENSR00000023992	10	6352670	6358670
CHOL	ENSR00000023993	10	6353865	6359865
CHOL	ENSR00000023994	10	6361042	6367042
CHOL	ENSR00000258044	10	6445462	6451462
CHOL	ENSR00000024153	10	7714785	7720785
CHOL	ENSR00000025090	10	17259876	17265876
CHOL	ENSR00000258636	10	26705229	26711229
CHOL	ENSR00000258722	10	29715729	29721729
CHOL	ENSR00000026082	10	29716193	29722193
CHOL	ENSR00000026590	10	33377332	33383332
CHOL	ENSR00000026599	10	33420128	33426128
CHOL	ENSR00000026600	10	33423028	33429028
CHOL	ENSR00000027444	10	45441415	45447415
CHOL	ENSR00000027722	10	47090475	47096486
CHOL	ENSR00000027724	10	47122077	47128076
CHOL	ENSR00000027558	10	47122116	47128116
CHOL	ENSR00000027725	10	47126294	47132294
CHOL	ENSR00000027726	10	47126616	47132616
CHOL	10:46408840-46414840	10	47134908	47140910
CHOL	ENSR00000027547	10	47732204	47738204
CHOL	ENSR00000027731	10	49209911	49215901
CHOL	ENSR00000259488	10	50638546	50644546
CHOL	ENSR00000027894	10	50646946	50652946
CHOL	ENSR00000027895	10	50651268	50657268
CHOL	ENSR00000027896	10	50652240	50658240
CHOL	ENSR00000030484	10	80203769	80209769
CHOL	ENSR00000030485	10	80205743	80211743
CHOL	ENSR00000031041	10	88963857	88969857
CHOL	ENSR00000031042	10	88968758	88974758
CHOL	ENSR00000031043	10	88970957	88976957
CHOL	ENSR00000260651	10	88971457	88977457
CHOL	ENSR00000031044	10	88973053	88979053
CHOL	ENSR00000260901	10	96614957	96620957
CHOL	ENSR00000260944	10	97925456	97931456
CHOL	ENSR00000261220	10	105622358	105628358
CHOL	ENSR00000338303	11	123774	131217
CHOL	ENSR00000243306	11	125330	136193
CHOL	ENSR00000243305	11	127523	138368
CHOL	ENSR00000035643	11	512389	518389
CHOL	ENSR00000262334	11	513900	519900
CHOL	ENSR00000262508	11	3492030	3498030
CHOL	ENSR00000262509	11	3494630	3500630
CHOL	ENSR00000038585	11	33709746	33715746
CHOL	ENSR00000038731	11	34683853	34689853
CHOL	ENSR00000263612	11	36501150	36507150
CHOL	ENSR00000263774	11	43879550	43885550
CHOL	ENSR00000039212	11	43885284	43891284
CHOL	ENSR00000039213	11	43887650	43893650
CHOL	ENSR00000263789	11	44271550	44277550
CHOL	ENSR00000039713	11	47625508	47631508
CHOL	ENSR00000039714	11	47626244	47632244
CHOL	ENSR00000264041	11	56850275	56856275
CHOL	ENSR00000264070	11	57603272	57609272
CHOL	11:61994097-62000097	11	61761569	61767569
CHOL	ENSR00000040875	11	65433472	65439472
CHOL	ENSR00000264543	11	67609971	67615971
CHOL	ENSR00000264544	11	67612571	67618571
CHOL	ENSR00000264768	11	71454646	71460646
CHOL	ENSR00000264769	11	71457046	71463046
CHOL	ENSR00000045241	11	114185522	114191522
CHOL	ENSR00000266160	11	119448211	119454211
CHOL	ENSR00000047484	12	79173	85173
CHOL	ENSR00000267479	12	21398734	21404734
CHOL	ENSR00000050509	12	30957434	30963434
CHOL	ENSR00000267754	12	30957734	30963734
CHOL	ENSR00000268133	12	46666183	46672183
CHOL	ENSR00000051218	12	46667658	46673658
CHOL	ENSR00000053382	12	66394438	66400438
CHOL	ENSR00000057216	12	110212564	110218564
CHOL	ENSR00000058381	12	121394135	121400135
CHOL	ENSR00000058382	12	121394760	121400760
CHOL	ENSR00000058383	12	121397650	121403650
CHOL	ENSR00000061665	13	41119137	41125137
CHOL	ENSR00000061666	13	41120737	41126737
CHOL	ENSR00000271728	13	41441236	41447236
CHOL	13:76589783-76595783	13	77163918	77169918
CHOL	ENSR00000065658	13	109914387	109920387
CHOL	ENSR00000065683	13	110071754	110077754
CHOL	ENSR00000065684	13	110073547	110079547
CHOL	ENSR00000273268	13	110073547	110079547
CHOL	ENSR00000065685	13	110076655	110082655
CHOL	ENSR00000065722	13	110440594	110446594
CHOL	ENSR00000065731	13	110519031	110525031
CHOL	ENSR00000065732	13	110520494	110526494
CHOL	ENSR00000273807	14	24939706	24945706
CHOL	ENSR00000068090	14	50493906	50499906
CHOL	14:50028128-50034128	14	50494846	50500846
CHOL	ENSR00000068091	14	50495519	50501519
CHOL	ENSR00000068584	14	54178947	54184947
CHOL	ENSR00000073844	14	106045668	106051668
CHOL	ENSR00000074315	15	29975135	29981135
CHOL	ENSR00000074316	15	29975904	29981904
CHOL	ENSR00000074383	15	30714403	30720403
CHOL	ENSR00000074384	15	30715103	30721103
CHOL	ENSR00000074563	15	32756201	32762201
CHOL	ENSR00000074564	15	32758401	32764401
CHOL	ENSR00000074565	15	32759501	32765501
CHOL	ENSR00000075512	15	40687702	40693702
CHOL	ENSR00000075569	15	41151441	41157441
CHOL	ENSR00000076776	15	53719537	53725537
CHOL	ENSR00000277845	15	62447499	62453499
CHOL	15:72322062-72328062	15	72614403	72620403
CHOL	ENSR00000080396	15	82972454	82978444
CHOL	ENSR00000080397	15	82975594	82981587
CHOL	ENSR00000279451	16	2697501	2703501
CHOL	ENSR00000082518	16	2697728	2703728
CHOL	ENSR00000082519	16	2702243	2708243
CHOL	ENSR00000084886	16	28383732	28389732
CHOL	ENSR00000084977	16	29157321	29163321
CHOL	ENSR00000085004	16	29265842	29271842
CHOL	ENSR00000280261	16	29265921	29271921
CHOL	ENSR00000085043	16	29428327	29434327
CHOL	ENSR00000085065	16	29611942	29617942
CHOL	ENSR00000087140	16	67530203	67536203
CHOL	ENSR00000087861	16	74352485	74358485
CHOL	ENSR00000087862	16	74353471	74359471
CHOL	ENSR00000088030	16	75623198	75629198
CHOL	16:85841944-85847944	16	85875550	85881550
CHOL	ENSR00000089201	16	86692793	86698793
CHOL	ENSR00000281945	16	88286206	88292206
CHOL	ENSR00000282517	17	14131417	14137417
CHOL	ENSR00000091521	17	14131745	14137745
CHOL	ENSR00000091626	17	15331817	15337817
CHOL	ENSR00000091761	17	16287514	16293514
CHOL	ENSR00000091916	17	17341843	17347843
CHOL	ENSR00000091917	17	17343725	17349725
CHOL	ENSR00000091918	17	17346709	17352709
CHOL	ENSR00000092461	17	21179112	21185112
CHOL	ENSR00000282764	17	21180512	21186512
CHOL	ENSR00000092462	17	21180538	21186538
CHOL	ENSR00000092878	17	27880034	27886034
CHOL	ENSR00000093166	17	30150194	30156194
CHOL	17:32393542-32399542	17	30720561	30726561
CHOL	17:32394871-32400871	17	30721890	30727890
CHOL	ENSR00000094486	17	41070166	41076166
CHOL	ENSR00000283458	17	41394061	41400064
CHOL	ENSR00000094548	17	41396649	41402652
CHOL	17:43340887-43346887	17	41418255	41424255
CHOL	ENSR00000094946	17	43573790	43579790
CHOL	ENSR00000094947	17	43575166	43581166
CHOL	ENSR00000283527	17	43575966	43581966
CHOL	ENSR00000095758	17	48991661	48997661
CHOL	ENSR00000095759	17	48993961	48999961
CHOL	ENSR00000095760	17	48996661	49002661
CHOL	ENSR00000099563	17	80234318	80240318
CHOL	ENSR00000284872	18	3238898	3244898
CHOL	ENSR00000101971	18	29180486	29186486
CHOL	ENSR00000103787	18	55207260	55213260
CHOL	ENSR00000286548	18	65163437	65169437
CHOL	19:788350-794350	19	788350	794350
CHOL	ENSR00000106418	19	5797681	5803681
CHOL	19:9742459-9748459	19	9853135	9859135
CHOL	ENSR00000106947	19	10135373	10141373
CHOL	ENSR00000287381	19	10135676	10141676
CHOL	ENSR00000287548	19	13948914	13954914
CHOL	19:36677323-36683323	19	37168225	37174225
CHOL	ENSR00000288373	19	40566307	40572307
CHOL	ENSR00000109507	19	40817798	40823798
CHOL	ENSR00000289662	2	8668830	8674830
CHOL	ENSR00000112435	2	8674530	8680530
CHOL	ENSR00000113008	2	12161438	12167438
[truncated: 12,717 more rows]

## Sheet: Table S2
Table S2 Summary of characteristics of individuals in the replication stage
	Replication phase in PLCO (n＝7398)				Replication phase in UKB (n＝31,476)
	Cases	Controls	P-value		Cases	Controls	P-value
		n(%)			n(%)	n(%)
Gender [n(%)]			0.925*				0.976*
Male	675(54.7)	3365(54.6)			3064(58.4)	15,327 (58.4)
Female	558(45.3)	2800(45.4)			2182(41.6)	10,903 (41.6)
Age (mean ± SD)	64.0 ± 5.3	63.8 ± 5.2	0.311†		61.2 ± 6.3	61.2 ± 6.3	0.982†
Age group [year, n(%)]			0.495*				1.000*
≤49	—	—			309(5.9)	1546 (5.9)
50 – 59	281(22.8)	1405(22.8)			1394(26.6)	6975(26.6)
60 – 69	736(59.7)	3762(61.0)			3478(66.3)	17,383(66.3)
≥70	216(17.5)	998(16.2)			65(1.2)	326(1.2)
Drinking status [n(%)]			0.770*				0.822*
No	448(36.3)	2211(35.9)			408(7.8)	2067(7.9)
Yes	785(63.7)	3954(64.1)			4838(92.2)	24,163(92.1)
Smoking status [n(%)]			＜0.001*				＜0.001*
No	553(44.9)	3304(53.6)			2416(46.0)	13,416(51.2)
Yes	680(55.1)	2861(46.4)			2830(54.0)	12,814(48.8)
Total	1233	6165			5246	26230
† P-values were calculated by a two-sided Student’s t-test for age;
* P-values were calculated by the Pearson’s χ2 test for gender, age group, smoking status, and drinking status.

## Sheet: Table S3
Table S3 Probes or primers sequence used in the study
qRT-PCR (5’-3’)
GAPDH	Forward	GGAGTCCACTGGCGTCTTCA
	Reverse	GTCATGAGTCCTTCCACGATACC
HOXA5	Forward	AACTCATTTTGCGGTCGCTAT
	Reverse	TCCCTGAATTGCTCGCTCAC
ENSR00000155786	Forward	GGCTGAGCAGATGAGGTCAAAG
	Reverse	CCACACCTGAGAAGGCAGTATT
SENP7	Forward	ACGGCCATCTTCATCCGAAAT
	Reverse	CAAAGGGAGAGTCCAGCGTT
siRNAs (5'-3')
siHOXA5	siRNA-1	CCGCAGAAGGAGGAUUGAAAU
		AUUUCAAUCCUCCUUCUGCGG
	siRNA-2	CGGACUACCAGUUGCAUAATT
		UUAUGCAACUGGUAGUCCGTT
	siControl	UUCUCCGAACGUGUCACGUTT
		ACGUGACACGUUCGGAGAATT
siENSR00000155786	siRNA-1	CCACAUAAAGUUCAAGUAATT
		UUACUUGAACUUUAUGUGGTT
	siRNA-2	CAAGCUCUGCAACCAGUUATT
		UAACUGGUUGCAGAGCUUGTT
	siControl	UUCUCCGAACGUGUCACGUTT
		ACGUGACACGUUCGGAGAATT
siSENP7	siRNA-1	GAAAGAAGCCUAAGGAAUATT
		UAUUCCUUAGGCUUCUUUCTT
	siRNA-2	GAAGAAAGGAUGAUGGCAUTT
		AUGCCAUCAUCCUUUCUUCTT
	siControl	UUCUCCGAACGUGUCACGUTT
		ACGUGACACGUUCGGAGAATT
ENSR00000155786 ChIRP probes (5'-3')
ENSR00000155786_1	Odd	GCCAGTAGCTTATCAATACT[BtnTg]
ENSR00000155786_2	Even	GATGTGAACCTTTCACCATG[BtnTg]
ENSR00000155786_3	Odd	AGGAAAAGTTCCAGCAGGAG[BtnTg]
ENSR00000155786_4	Even	CCAGGCTGATGTTTCTATCA[BtnTg]
ENSR00000155786_5	Odd	CCTTTTTAGAAGCGGTCACT[BtnTg]
ENSR00000155786_6	Even	CCTTTCCATTACTTGGGAAT[BtnTg]
ENSR00000155786_7	Odd	ACTGTTCCCTGGAGTGCCAA[BtnTg]
ENSR00000155786_8	Even	TGTTGATATTTTGTGTGCTG[BtnTg]
LacZ	ChIRP probe	TCACGACGTTGTAAAACGAC[BtnTg]
LacZ	ChIRP probe	ATTAAGTTGGGTAACGCCAG[BtnTg]
For ChIRP-PCR DNA detection (5'-3')
SENP7 promoter	Forward	TGAAATAAACGCCACCAA
	Reverse	GACAATATGTTCAGCCCTTCT
SENP7 enhancer	Forward	CTGGTGGCTGGTTCTTT
	Reverse	TGGCGTATGCTAACTGACT

## Sheet: Table S4
Table S4 Summary of eRNAQTLs in 30 cancers
Cancer type	Full name	Sample size	Number of genotypes	Number of eRNA	QTL-eRNA pairs	QTL	eRNA	Survival-eRNAQTL	GWAS-eRNAQTL
ACC	Adrenocortical carcinoma	77	3623963	336	162	161	19	2	29
BLCA	Bladder urothelial carcinoma	408	4471590	477	6383	4325	174	37	1500
BRCA	Breast invasive carcinoma	1087	3986675	443	20123	12642	303	9	4870
CESC	Cervical squamous cell carcinoma and endocervical adenocarcinoma	299	4510597	527	5144	3873	195	54	1598
CHOL	Cholangiocarcinoma	36	4093957	533	7	4	5	0	0
CRC	Colon & rectum adenocarcinoma	379	3740847	232	3697	3048	105	0	1042
DLBC	Lymphoid neoplasm diffuses large B-cell lymphoma	48	4723248	472	152	131	12	2	55
GBM	Glioblastoma multiforme	149	4429789	468	8631	6316	187	0	2397
HNSC	Head and neck squamous cell carcinoma	498	4542925	469	15228	9813	278	1	3881
KICH	Kidney chromophobe	66	3834252	473	807	657	56	4	145
KIRC	Kidney renal clear cell carcinoma	522	4697228	615	25102	17766	364	7	7491
KIRP	Kidney renal papillary cell carcinoma	288	4904767	575	18802	12812	310	73	5929
LGG	Lower grade glioma	510	4671985	697	20737	33673	235	75	5410
LIHC	Liver hepatocellular carcinoma	369	4405766	266	6881	5188	137	126	2383
LUAD	Lung adenocarcinoma	510	4625567	538	15118	9898	285	0	3925
LUSC	Lung squamous cell carcinoma	500	4313749	503	13547	8968	266	2	3036
MESO	Mesothelioma	86	4533138	394	1090	807	40	1	428
OV	Ovarian serous cystadenocarcinoma	263	3563220	545	4683	3514	217	1	1052
PAAD	Pancreatic adenocarcinoma	177	4752807	436	12215	7841	192	5	3612
PCPG	Pheochromocytoma and Paraganglioma	178	4612693	465	11117	7958	191	93	3393
PRAD	Prostate adenocarcinoma	492	4835189	531	32691	20707	370	68	8456
SARC	Sarcoma	258	4316967	453	6238	4918	165	59	2137
SKCM	Skin cutaneous melanoma	103	4584195	355	951	917	39	1	577
STAD	Stomach adenocarcinoma	376	4512254	580	9606	5264	258	11	1971
TGCT	Testicular germ cell tumors	150	4635174	1091	10396	7185	353	112	2848
THCA	Thyroid carcinoma	500	4864888	431	36050	24838	328	55	11602
THYM	Thymoma	119	4720391	824	9895	6263	276	0	2957
UCEC	Uterine corpus endometrial carcinoma	174	4935170	297	1590	1271	66	4	465
UCS	Uterine carcinosarcoma	55	3857749	432	370	299	37	0	131
UVM	Uveal melanoma	80	4743888	258	2699	1951	61	0	1111

## Sheet: Table S5
Table S5 Enrichment of eRNAQTLs in the histone modification peaks
Marker	Cacner type	Lower	OR	Upper	Enrichment P-value	Bonferroni P-value
H3K4me1	BLCA	1.12522	1.24394	1.37552	1.58559e-05	0.000110992
H3K4me1	BRCA	1.15036	1.21904	1.29195	1.54619e-11	1.08233e-10
H3K4me1	CESC	1.10097	1.22449	1.36222	0.000159352	0.00111547
H3K4me1	CRC	1.13752	1.28264	1.4469	4.07895e-05	0.000285527
H3K4me1	HNSC	1.21224	1.29494	1.38342	9.19962e-15	6.43973e-14
H3K4me1	KIRC	1.11469	1.17115	1.23054	2.88746e-10	2.02122e-09
H3K4me1	KIRP	1.19503	1.26601	1.34134	6.00744e-16	4.20521e-15
H3K4me1	LGG	1.19226	1.23563	1.28063	1.52077e-31	1.06454e-30
H3K4me1	LIHC	1.13781	1.23573	1.34216	3.87369e-07	2.71158e-06
H3K4me1	LUAD	1.24235	1.32789	1.4195	3.22981e-17	2.26087e-16
H3K4me1	LUSC	1.05316	1.12812	1.20858	0.00055873	0.00391111
H3K4me1	OV	1.27257	1.42506	1.59649	4.53485e-10	3.17439e-09
H3K4me1	PAAD	1.08494	1.1608	1.24207	1.34026e-05	9.3818e-05
H3K4me1	STAD	1.13548	1.24273	1.36041	1.81806e-06	1.27264e-05
H3K4me1	TGCT	1.1519	1.2458	1.34753	2.69553e-08	1.88687e-07
H3K4me1	THCA	1.13537	1.18435	1.23552	2.69328e-15	1.8853e-14
H3K4me1	THYM	1.27189	1.37074	1.47741	7.09831e-17	4.96882e-16
H3K4me2	BLCA	1.24041	1.39903	1.57914	2.35048e-08	1.64533e-07
H3K4me2	BRCA	1.30692	1.39981	1.49959	1.90416e-22	1.33291e-21
H3K4me2	CESC	1.3207	1.49979	1.70471	1.70398e-10	1.19278e-09
H3K4me2	CRC	1.37332	1.57989	1.81958	5.28404e-11	3.69883e-10
H3K4me2	HNSC	1.21053	1.30923	1.41645	8.70419e-12	6.09293e-11
H3K4me2	KICH	1.13351	1.6231	2.35192	0.00591145	0.0413801
H3K4me2	KIRC	1.29975	1.37782	1.46082	8.3134e-28	5.81938e-27
H3K4me2	KIRP	1.32058	1.41507	1.51674	1.48417e-23	1.03892e-22
H3K4me2	LGG	1.26493	1.31983	1.3773	2.46757e-38	1.7273e-37
H3K4me2	LIHC	1.3433	1.4815	1.63442	1.42685e-15	9.98798e-15
H3K4me2	LUAD	1.32033	1.42949	1.5482	2.67767e-19	1.87437e-18
H3K4me2	LUSC	1.1605	1.25875	1.36562	1.87217e-08	1.31052e-07
H3K4me2	MESO	1.11104	1.47763	1.97442	0.00604429	0.04231
H3K4me2	OV	1.27839	1.46416	1.67873	1.85806e-08	1.30064e-07
H3K4me2	PAAD	1.29454	1.40101	1.51641	2.49351e-17	1.74546e-16
H3K4me2	PCPG	1.14326	1.25319	1.37428	1.05903e-06	7.41319e-06
H3K4me2	PRAD	1.14476	1.2087	1.27634	5.29241e-12	3.70468e-11
H3K4me2	SARC	1.21144	1.35957	1.52693	1.14456e-07	8.01193e-07
H3K4me2	STAD	1.20722	1.34265	1.49408	3.46492e-08	2.42545e-07
H3K4me2	TGCT	1.37571	1.51023	1.65879	9.44178e-19	6.60925e-18
H3K4me2	THCA	1.31822	1.38622	1.45795	3.68078e-38	2.57655e-37
H3K4me2	THYM	1.32505	1.44833	1.58347	1.37006e-16	9.5904e-16
H3K4me2	UCEC	1.23528	1.56535	1.99115	0.000146692	0.00102684
H3K9ac	BLCA	1.28385	1.4707	1.6868	1.14911e-08	8.0438e-08
H3K9ac	BRCA	1.42657	1.54555	1.67525	1.27104e-27	8.89726e-27
H3K9ac	CESC	1.2852	1.4848	1.71784	4.00298e-08	2.80208e-07
H3K9ac	CRC	1.63578	1.92009	2.25865	9.43326e-17	6.60328e-16
H3K9ac	GBM	1.06103	1.19328	1.34287	0.00287884	0.0201519
H3K9ac	HNSC	1.35315	1.48136	1.6226	3.24543e-18	2.2718e-17
H3K9ac	KICH	1.47069	2.25408	3.54227	7.20886e-05	0.00050462
H3K9ac	KIRC	1.3286	1.42234	1.52313	5.40624e-25	3.78437e-24
H3K9ac	KIRP	1.49259	1.61904	1.75697	8.63239e-33	6.04267e-32
H3K9ac	LGG	1.45972	1.53318	1.61058	5.75e-68	4.025e-67
H3K9ac	LIHC	1.2243	1.37061	1.53497	2.55626e-08	1.78938e-07
H3K9ac	LUAD	1.50204	1.64752	1.80827	1.0786e-27	7.55017e-27
H3K9ac	LUSC	1.23555	1.35658	1.49025	7.69842e-11	5.38889e-10
H3K9ac	OV	1.31222	1.54307	1.81823	6.46407e-08	4.52485e-07
H3K9ac	PAAD	1.38106	1.51328	1.65876	1.5816e-19	1.10712e-18
H3K9ac	PCPG	1.1626	1.29302	1.43908	1.41497e-06	9.9048e-06
H3K9ac	PRAD	1.18723	1.26493	1.34806	1.86975e-13	1.30882e-12
H3K9ac	SARC	1.31855	1.50299	1.71539	3.84256e-10	2.68979e-09
H3K9ac	STAD	1.19986	1.3573	1.53679	7.14283e-07	4.99998e-06
H3K9ac	TGCT	1.34776	1.49848	1.6673	1.83195e-14	1.28237e-13
H3K9ac	THCA	1.32319	1.40332	1.4886	1.214e-30	8.49803e-30
H3K9ac	THYM	1.47127	1.62737	1.80081	4.14662e-22	2.90263e-21
H3K9ac	UCEC	1.48697	1.9742	2.64284	8.17645e-07	5.72352e-06
H3K27ac	BLCA	1.26266	1.38981	1.52988	1.13121e-11	7.91849e-11
H3K27ac	BRCA	1.30042	1.37428	1.45245	6.49796e-30	4.54858e-29
H3K27ac	CESC	1.16225	1.28679	1.42475	8.69694e-07	6.08786e-06
H3K27ac	CRC	1.27887	1.43516	1.61069	4.77063e-10	3.33944e-09
H3K27ac	GBM	1.13773	1.22877	1.32718	1.26288e-07	8.84017e-07
H3K27ac	HNSC	1.41806	1.51187	1.61208	2.79601e-37	1.95721e-36
H3K27ac	KICH	1.27591	1.69945	2.26767	0.000194541	0.00136178
H3K27ac	KIRC	1.28275	1.34452	1.40935	2.28141e-35	1.59699e-34
H3K27ac	KIRP	1.38886	1.4671	1.54987	2.15807e-43	1.51065e-42
H3K27ac	LGG	1.29812	1.34312	1.3897	2.7246e-65	1.90722e-64
H3K27ac	LIHC	1.29314	1.40012	1.51613	4.87844e-17	3.41491e-16
H3K27ac	LUAD	1.36301	1.45291	1.54886	6.21985e-31	4.3539e-30
H3K27ac	LUSC	1.14373	1.22209	1.30585	2.18365e-09	1.52855e-08
H3K27ac	OV	1.04076	1.15867	1.29002	0.00642215	0.044955
H3K27ac	PAAD	1.39065	1.48364	1.58305	1.91925e-33	1.34348e-32
H3K27ac	PCPG	1.20738	1.2955	1.39016	3.57769e-13	2.50438e-12
H3K27ac	PRAD	1.22068	1.27466	1.33109	1.94143e-28	1.359e-27
H3K27ac	SARC	1.24862	1.36806	1.49905	1.12618e-11	7.88328e-11
H3K27ac	STAD	1.21934	1.3299	1.45066	7.82617e-11	5.47832e-10
H3K27ac	TGCT	1.3701	1.47688	1.59225	8.21546e-25	5.75082e-24
H3K27ac	THCA	1.16053	1.20821	1.25787	2.2239e-20	1.55673e-19
H3K27ac	THYM	1.30049	1.39797	1.50291	4.72792e-20	3.30954e-19
H3K27ac	UCEC	1.09152	1.30971	1.57223	0.00321988	0.0225392
H3K27ac	UVM	1.09235	1.26636	1.46815	0.00143966	0.0100776
H3K27me3	ACC	0.165836	0.301525	0.539963	1.73472e-05	0.000121431
H3K27me3	BLCA	0.585452	0.650119	0.721868	4.25386e-16	2.9777e-15
H3K27me3	BRCA	0.679943	0.722229	0.7671	2.00271e-26	1.4019e-25
H3K27me3	CESC	0.485567	0.54374	0.608849	1.04117e-26	7.28818e-26
H3K27me3	CRC	0.425407	0.48537	0.553683	7.3639e-28	5.15473e-27
H3K27me3	GBM	0.345243	0.378258	0.414317	1.41144e-101	9.88009e-101
H3K27me3	HNSC	0.621241	0.665373	0.712589	9.53421e-32	6.67394e-31
H3K27me3	KICH	0.374037	0.513146	0.704767	2.45945e-05	0.000172161
H3K27me3	KIRC	0.589532	0.620918	0.653913	1.85419e-73	1.29793e-72
H3K27me3	KIRP	0.459914	0.489331	0.520643	3.53953e-115	2.47767e-114
H3K27me3	LGG	0.572326	0.594371	0.617291	3.53593e-161	2.47515e-160
H3K27me3	LIHC	0.461489	0.505315	0.553192	2.41696e-51	1.69187e-50
H3K27me3	LUAD	0.469026	0.503597	0.540699	4.33033e-81	3.03123e-80
H3K27me3	LUSC	0.509296	0.548483	0.590697	9.02106e-58	6.31474e-57
H3K27me3	MESO	0.368582	0.480718	0.626242	2.58705e-08	1.81093e-07
H3K27me3	OV	0.600918	0.67661	0.761863	6.95293e-11	4.86705e-10
H3K27me3	PAAD	0.504615	0.542899	0.583996	2.4956e-62	1.74692e-61
H3K27me3	PCPG	0.394836	0.428978	0.466038	9.5897e-92	6.71279e-91
H3K27me3	PRAD	0.587201	0.615693	0.645546	2.30197e-90	1.61138e-89
H3K27me3	SARC	0.397725	0.441842	0.490775	6.29607e-54	4.40725e-53
H3K27me3	SKCM	0.542757	0.670521	0.828011	0.000154147	0.00107903
H3K27me3	STAD	0.414253	0.456966	0.503985	5.46561e-57	3.82593e-56
H3K27me3	TGCT	0.502381	0.545482	0.592284	4.90733e-48	3.43513e-47
H3K27me3	THCA	0.562338	0.588074	0.615009	2.40561e-120	1.68393e-119
H3K27me3	THYM	0.586643	0.635673	0.688706	3.05277e-29	2.13694e-28
H3K27me3	UVM	0.323356	0.381882	0.450777	2.37866e-31	1.66506e-30
H3K79me2	BLCA	1.44125	1.66085	1.91689	4.23631e-13	2.96541e-12
H3K79me2	BRCA	1.59878	1.72923	1.8712	4.33935e-45	3.03754e-44
H3K79me2	CESC	1.64875	1.89025	2.17032	2.77609e-21	1.94326e-20
H3K79me2	CRC	2.27429	2.65876	3.11563	5.42154e-39	3.79508e-38
H3K79me2	GBM	1.49874	1.67571	1.87529	1.21081e-20	8.47569e-20
H3K79me2	HNSC	1.43207	1.56375	1.70834	1.85377e-24	1.29764e-23
H3K79me2	KIRC	1.96385	2.09909	2.24467	1.81658e-114	1.27161e-113
H3K79me2	KIRP	1.96012	2.11682	2.28713	3.11938e-88	2.18357e-87
H3K79me2	LGG	1.84528	1.93486	2.02921	1.89237e-175	1.32466e-174
H3K79me2	LIHC	2.05162	2.28463	2.54602	5.43042e-55	3.80129e-54
H3K79me2	LUAD	1.83284	2.00516	2.19521	2.95083e-56	2.06558e-55
H3K79me2	LUSC	1.45807	1.59854	1.75349	1.12673e-24	7.88708e-24
H3K79me2	MESO	1.9759	2.66496	3.6259	7.32114e-12	5.1248e-11
H3K79me2	OV	1.74367	2.03513	2.3806	3.91296e-21	2.73907e-20
H3K79me2	PAAD	1.88814	2.0615	2.25164	4.53255e-62	3.17279e-61
H3K79me2	PCPG	1.8396	2.04261	2.27033	2.92166e-44	2.04516e-43
H3K79me2	PRAD	1.49197	1.58684	1.68832	4.86946e-51	3.40862e-50
H3K79me2	SARC	1.72569	1.95798	2.22465	1.84063e-27	1.28844e-26
H3K79me2	STAD	1.542	1.73938	1.9642	1.4886e-20	1.04202e-19
H3K79me2	TGCT	1.70183	1.8858	2.09147	3.16762e-36	2.21733e-35
H3K79me2	THCA	1.80299	1.90756	2.01876	1.0042e-119	7.02941e-119
H3K79me2	THYM	2.01467	2.21932	2.44607	1.28628e-62	9.00396e-62
H3K79me2	UCEC	1.42649	1.8559	2.4299	1.39213e-06	9.7449e-06
H3K79me2	UCS	1.27771	2.11156	3.57036	0.00206185	0.0144329
H3K79me2	UVM	1.30561	1.59227	1.9476	2.15505e-06	1.50853e-05
DNase	BLCA	1.18651	1.30863	1.44366	5.13634e-08	3.59544e-07
DNase	BRCA	1.26285	1.33669	1.41494	5.04477e-24	3.53134e-23
DNase	CESC	1.27757	1.41725	1.57249	2.35634e-11	1.64944e-10
DNase	CRC	1.31256	1.47688	1.66235	4.18362e-11	2.92853e-10
DNase	GBM	1.08098	1.16974	1.26591	8.33355e-05	0.000583348
DNase	HNSC	1.26032	1.34471	1.43491	1.53992e-19	1.07794e-18
DNase	KICH	1.41544	1.90471	2.57389	1.05539e-05	7.38772e-05
DNase	KIRC	1.18788	1.24662	1.3083	1.79885e-19	1.2592e-18
DNase	KIRP	1.25839	1.33112	1.4082	7.29151e-24	5.10406e-23
DNase	LGG	1.31893	1.3658	1.41443	1.35045e-69	9.45317e-69
DNase	LIHC	1.1151	1.20965	1.31226	3.91645e-06	2.74152e-05
DNase	LUAD	1.33027	1.41979	1.51548	1.39028e-26	9.73195e-26
DNase	LUSC	1.15224	1.23276	1.31901	9.23532e-10	6.46472e-09
DNase	OV	1.22256	1.36689	1.52871	2.36397e-08	1.65478e-07
DNase	PAAD	1.26452	1.3503	1.44196	1.39804e-19	9.78631e-19
DNase	PCPG	1.22123	1.31345	1.41279	1.11554e-13	7.80875e-13
DNase	PRAD	1.27145	1.32928	1.38983	1.24836e-36	8.73851e-36
DNase	SARC	1.30104	1.42924	1.57051	4.44218e-14	3.10952e-13
DNase	STAD	1.21692	1.32931	1.45239	1.78841e-10	1.25188e-09
DNase	TGCT	1.18842	1.28256	1.38433	1.08699e-10	7.60891e-10
DNase	THCA	1.15751	1.20665	1.25792	5.19065e-19	3.63345e-18
DNase	THYM	1.25701	1.35339	1.4573	5.61806e-16	3.93264e-15
DNase	UCEC	1.23115	1.48451	1.79174	2.23938e-05	0.000156757

## Sheet: Table S6
Table S6 Enrichment of eRNAQTLs in the binding site of transcription factors
Transcription factor	Cacner type	Lower	OR	Upper	Enrichment P-value	Bonferroni P-value
SAP130	BLCA	1.75803	2.57582	3.86421	1.11811e-07	8.95608e-05
RBFOX2	BLCA	1.54239	2.16112	3.07661	1.9885e-06	0.00159279
KDM1A	BLCA	1.97427	3.31099	5.85356	3.89024e-07	0.000311608
L3MBTL2	BLCA	1.72521	2.68054	4.30547	1.85283e-06	0.00148412
ZGPAT	BLCA	1.91121	3.09568	5.23874	3.1885e-07	0.000255399
JUN	BLCA	1.92119	3.07865	5.14241	2.01257e-07	0.000161207
PHF21A	BLCA	1.92117	3.02056	4.93007	1.18099e-07	9.45969e-05
HMGXB4	BLCA	2.10569	3.36012	5.59398	8.79813e-09	7.0473e-06
ZNF574	BLCA	1.90081	3.11457	5.34532	5.04952e-07	0.000404466
MNX1	BLCA	1.99802	3.34898	5.91838	2.59112e-07	0.000207549
HNF1B	BLCA	2.08932	3.805	7.49493	6.89204e-07	0.000552052
E4F1	BLCA	1.96694	3.34621	6.02341	6.09679e-07	0.000488353
PHF8	BLCA	2.26144	3.76806	6.62892	6.50663e-09	5.21181e-06
SUPT5H	BLCA	2.11759	3.5392	6.24129	5.1656e-08	4.13765e-05
ZBTB40	BLCA	2.16359	4.12927	8.67547	6.65579e-07	0.000533129
YEATS4	BLCA	2.22595	3.88614	7.25501	3.58777e-08	2.8738e-05
IRF2	BLCA	2.39442	4.67961	10.2023	1.06011e-07	8.49146e-05
ZBTB11	BLCA	2.23042	3.58708	6.03625	1.78259e-09	1.42785e-06
ZSCAN31	BLCA	3.15119	6.53377	15.6898	2.7167e-10	2.17608e-07
NFKB2	BLCA	2.88882	6.30295	16.3091	1.04206e-08	8.34687e-06
POLR2AphosphoS2	BLCA	4.17469	10.1942	32.34	6.93397e-12	5.55411e-09
THAP9	BLCA	1.95944	3.38603	6.21726	9.54186e-07	0.000764303
ZNF547	BLCA	3.57978	9.68719	36.771	3.84041e-09	3.07616e-06
ZNF607	BLCA	2.62293	5.2769	12.0311	2.40171e-08	1.92377e-05
RFXAP	BLCA	2.74862	6.01249	15.5851	4.42826e-08	3.54704e-05
BCL3	BLCA	4.00439	15.3323	130.739	1.7462e-08	1.39871e-05
ZNF891	BLCA	2.42176	5.33617	13.9019	7.72275e-07	0.000618592
ZNF709	BLCA	5.71412	33.3728	1336.77	2.4939e-10	1.99761e-07
KDM5A	BLCA	2.51496	5.52927	14.3849	2.98172e-07	0.000238836
ZNF883	BLCA	2.83823	6.56477	18.6341	5.76141e-08	4.61489e-05
GTF2E2	BLCA	2.3695	4.49994	9.4228	7.28167e-08	5.83261e-05
ZNF598	BLCA	2.55433	6.39487	20.6114	1.40541e-06	0.00112573
ZNF280B	BLCA	2.52934	5.88948	16.7888	6.49983e-07	0.000520636
ZNF230	BLCA	3.57978	9.68719	36.771	3.84041e-09	3.07616e-06
KLF12	BLCA	2.6619	7.32554	28.0884	1.78398e-06	0.00142897
ZNF784	BLCA	2.58061	6.0019	17.096	4.01905e-07	0.000321926
HBP1	BLCA	3.66834	21.9391	889.492	1.16053e-06	0.000929587
ZNF608	BLCA	3.17039	12.307	105.533	1.31739e-06	0.00105523
AGO1	BLCA	2.6117	6.5295	21.0274	8.5373e-07	0.000683838
SAFB2	BLCA	3.25128	8.84195	33.6762	3.02059e-08	2.41949e-05
GLI4	BLCA	3.54864	21.2694	863.227	2.07972e-06	0.00166586
ZNF34	BLCA	4.28365	16.3436	138.783	6.36226e-09	5.09617e-06
MIER1	BLCA	3.78853	22.6092	915.763	6.55994e-07	0.000525451
CTCF	BRCA	1.49284	1.78921	2.15209	4.38269e-11	3.51054e-08
ZNF687	BRCA	1.4917	1.72232	1.99271	1.43723e-14	1.15122e-11
MAX	BRCA	1.69382	2.09193	2.59861	3.19277e-13	2.55741e-10
SAP130	BRCA	1.94664	2.42904	3.05256	2.02968e-17	1.62577e-14
ZBTB33	BRCA	1.44664	1.85311	2.39146	3.37188e-07	0.000270087
POLR2G	BRCA	1.70054	2.06184	2.51159	5.64907e-15	4.52491e-12
RBFOX2	BRCA	2.28313	2.71742	3.24876	1.00198e-34	8.02585e-32
C11orf30	BRCA	1.49064	2.02698	2.79157	2.06134e-06	0.00165113
SOX6	BRCA	1.55997	1.98308	2.53961	3.39846e-09	2.72217e-06
IKZF1	BRCA	1.7419	2.37307	3.27985	3.93769e-09	3.15409e-06
HDAC1	BRCA	1.43599	1.8925	2.51803	1.85445e-06	0.00148542
ARID4B	BRCA	1.56916	2.02722	2.64168	9.00575e-09	7.21361e-06
RNF2	BRCA	1.58381	2.0309	2.62533	3.19163e-09	2.5565e-06
L3MBTL2	BRCA	1.82432	2.30272	2.92902	4.36854e-14	3.4992e-11
ZFX	BRCA	2.00658	2.54498	3.25529	4.97264e-17	3.98309e-14
CTBP1	BRCA	1.65778	2.16196	2.84685	1.37218e-09	1.09912e-06
ATF1	BRCA	1.82308	2.28097	2.87405	1.04901e-14	8.40257e-12
NR2C2	BRCA	1.72766	2.12733	2.63433	3.55149e-14	2.84475e-11
ZNF770	BRCA	1.46347	1.92384	2.55297	7.20169e-07	0.000576856
ARID4A	BRCA	1.94189	2.46194	3.14752	9.13718e-16	7.31888e-13
ZGPAT	BRCA	1.59934	2.06189	2.6809	3.29003e-09	2.63531e-06
TBX2	BRCA	1.51509	1.94838	2.52576	4.47373e-08	3.58346e-05
EGR1	BRCA	1.51709	2.03194	2.75245	4.72231e-07	0.000378257
ATF7	BRCA	1.4088	1.83278	2.40432	1.99623e-06	0.00159898
ASH2L	BRCA	2.07647	2.68926	3.5197	1.9693e-16	1.57741e-13
GABPB1	BRCA	1.62784	2.07985	2.67854	5.7957e-10	4.64236e-07
ZNF592	BRCA	1.65719	2.2275	3.03167	1.16328e-08	9.31785e-06
MED1	BRCA	1.52717	2.06418	2.82459	6.5317e-07	0.000523189
ZFY	BRCA	2.3034	3.03014	4.03705	1.46618e-18	1.17441e-15
MXI1	BRCA	1.94398	2.75509	3.98505	4.27493e-10	3.42422e-07
UBTF	BRCA	1.77221	2.29474	2.99981	1.21051e-11	9.69616e-09
KDM2A	BRCA	1.63618	2.15817	2.8769	5.90154e-09	4.72714e-06
ZNF501	BRCA	1.56021	1.98833	2.55305	4.61531e-09	3.69686e-06
POLR2A	BRCA	2.58576	3.39129	4.50639	1.71474e-23	1.37351e-20
JUN	BRCA	1.86145	2.53695	3.50983	1.60265e-10	1.28373e-07
HOXA3	BRCA	1.53226	2.07596	2.84792	5.59458e-07	0.000448126
PHF21A	BRCA	1.72547	2.2675	3.01166	3.28929e-10	2.63472e-07
POLR2AphosphoS5	BRCA	1.59523	2.27963	3.32029	1.45771e-06	0.00116763
LCORL	BRCA	1.6551	2.20956	2.98491	1.04583e-08	8.37712e-06
CREM	BRCA	1.67325	2.45398	3.68359	6.23426e-07	0.000499364
HMGXB4	BRCA	2.10955	2.73548	3.58546	7.48253e-17	5.99351e-14
EP400	BRCA	2.27973	2.96018	3.8879	1.77894e-19	1.42493e-16
ZNF574	BRCA	1.81986	2.41089	3.23198	3.58553e-11	2.87201e-08
KAT8	BRCA	1.84483	2.54537	3.56982	7.26464e-10	5.81897e-07
MGA	BRCA	1.61221	2.12768	2.83762	1.44587e-08	1.15814e-05
MNX1	BRCA	1.65662	2.17595	2.88784	2.42369e-09	1.94138e-06
POGZ	BRCA	1.58759	2.20363	3.10622	4.66987e-07	0.000374056
ZBTB38	BRCA	1.89486	2.59586	3.61258	1.02005e-10	8.17056e-08
HNF1B	BRCA	1.51376	2.0519	2.81635	1.00349e-06	0.000803799
E4F1	BRCA	2.08117	2.78899	3.79068	4.04856e-14	3.2429e-11
E2F1	BRCA	1.80205	2.40378	3.24648	1.02485e-10	8.20904e-08
ZNF48	BRCA	1.57361	2.17135	3.04056	4.74866e-07	0.000380368
PHF8	BRCA	2.25233	2.98354	4.00525	2.53801e-17	2.03294e-14
SUPT5H	BRCA	1.95642	2.53811	3.32726	2.51646e-14	2.01568e-11
TRIM24	BRCA	1.74399	2.53983	3.78401	1.43529e-07	0.000114967
ZBTB40	BRCA	2.32852	3.36939	5.00231	3.29587e-13	2.63999e-10
YEATS4	BRCA	2.05702	2.8018	3.87711	6.39593e-13	5.12314e-10
IKZF5	BRCA	1.60801	2.26138	3.23538	4.42115e-07	0.000354134
ZNF24	BRCA	1.93373	2.83299	4.25671	3.57913e-09	2.86688e-06
IRF2	BRCA	1.94314	2.83125	4.227	2.25535e-09	1.80654e-06
ZNF263	BRCA	1.71548	2.52645	3.81255	3.57746e-07	0.000286555
ISL2	BRCA	1.62466	2.35078	3.47351	1.13889e-06	0.00091225
KDM5B	BRCA	1.6842	2.21918	2.95556	1.2932e-09	1.03586e-06
DMAP1	BRCA	2.28012	3.22633	4.6661	1.17453e-13	9.40795e-11
ZBTB11	BRCA	3.34941	4.58534	6.40486	1.64388e-29	1.31675e-26
TAF1	BRCA	1.84294	2.52725	3.52021	3.9919e-10	3.19751e-07
ZNF639	BRCA	1.6585	2.27683	3.17186	4.76306e-08	3.81521e-05
HNRNPLL	BRCA	1.6426	2.35426	3.44171	4.58541e-07	0.000367292
ZNF395	BRCA	1.47486	1.96896	2.65714	1.07739e-06	0.000862992
ZNF788	BRCA	1.75755	2.46257	3.51214	1.24417e-08	9.96582e-06
ZEB2	BRCA	1.68221	2.55722	4.0016	1.81348e-06	0.0014526
ZNF350	BRCA	2.22517	3.04107	4.22756	8.93771e-15	7.15911e-12
RBBP5	BRCA	1.76919	2.34604	3.14767	1.81367e-10	1.45275e-07
POLR2H	BRCA	2.83397	3.84663	5.31494	2.32813e-23	1.86484e-20
GATAD1	BRCA	2.15582	3.28695	5.18358	6.26682e-10	5.01972e-07
ZNF317	BRCA	1.75727	2.53362	3.73252	5.69455e-08	4.56134e-05
MYBL2	BRCA	2.05438	3.27909	5.4597	2.83605e-08	2.27168e-05
NFRKB	BRCA	2.01362	2.96135	4.47168	8.84872e-10	7.08782e-07
TFDP1	BRCA	2.05762	2.73285	3.67722	2.71398e-14	2.17389e-11
KMT2A	BRCA	1.62003	2.31352	3.36769	7.60347e-07	0.000609038
ZNF772	BRCA	2.16692	3.23541	4.97664	1.07905e-10	8.64322e-08
KMT2B	BRCA	2.2466	3.37138	5.22063	3.42881e-11	2.74647e-08
ZSCAN31	BRCA	2.48781	3.52521	5.11107	6.79774e-16	5.44499e-13
E2F4	BRCA	2.43505	3.89807	6.53576	5.92035e-11	4.7422e-08
ZNF589	BRCA	1.69155	2.35723	3.34002	4.94116e-08	3.95787e-05
TOE1	BRCA	1.80661	2.68497	4.09713	7.93196e-08	6.3535e-05
SFPQ	BRCA	1.63091	2.2923	3.27794	3.22224e-07	0.000258101
SMAD5	BRCA	4.30652	6.91849	11.7561	1.81286e-24	1.4521e-21
ZNF792	BRCA	1.87996	2.90655	4.64957	9.88334e-08	7.91655e-05
ZNF777	BRCA	2.17977	3.27536	5.07696	1.15704e-10	9.26786e-08
POLR2B	BRCA	2.29938	3.58326	5.80666	1.34647e-10	1.07852e-07
FOXJ3	BRCA	1.76197	2.63759	4.05724	2.53262e-07	0.000202863
ZNF580	BRCA	1.68221	2.55722	4.0016	1.81348e-06	0.0014526
NFKB2	BRCA	2.17909	3.12986	4.60275	4.66859e-12	3.73954e-09
POLR2AphosphoS2	BRCA	2.14709	3.63507	6.5176	4.94887e-08	3.96405e-05
HOXA5	BRCA	1.99761	2.97359	4.55382	2.23683e-09	1.7917e-06
CCNT2	BRCA	1.85465	2.91858	4.76691	3.57617e-07	0.000286451
ETV4	BRCA	1.77751	2.80323	4.58595	1.07194e-06	0.000858624
THAP9	BRCA	1.7456	2.35312	3.21447	1.69051e-09	1.3541e-06
YEATS2	BRCA	2.09759	3.22672	5.14056	2.10091e-09	1.68283e-06
NRL	BRCA	2.03587	2.94577	4.36549	2.24927e-10	1.80166e-07
ZNF556	BRCA	1.67866	2.34816	3.34096	7.78577e-08	6.2364e-05
NBN	BRCA	1.83443	2.7085	4.10304	3.50791e-08	2.80984e-05
ZNF607	BRCA	2.29649	3.46732	5.4101	2.44061e-11	1.95493e-08
PML	BRCA	2.2794	3.52292	5.65195	1.32705e-10	1.06297e-07
RFXAP	BRCA	2.50165	3.92086	6.40721	7.41625e-12	5.94041e-09
ZNF691	BRCA	1.82563	2.8266	4.52636	2.94803e-07	0.000236137
ZNF441	BRCA	1.80117	2.86529	4.73819	1.21053e-06	0.000969633
AFF1	BRCA	2.59284	4.23629	7.29345	1.52887e-11	1.22462e-08
BCL3	BRCA	2.07119	3.51306	6.30842	1.14957e-07	9.2081e-05
ZNF503	BRCA	2.10017	3.50957	6.18832	4.94615e-08	3.96187e-05
ZNF274	BRCA	1.91261	3.00514	4.90166	1.14282e-07	9.154e-05
ZNF891	BRCA	2.26973	3.30448	4.93909	2.58195e-12	2.06814e-09
KAT7	BRCA	1.70714	2.43223	3.53353	1.07682e-07	8.62535e-05
ELF4	BRCA	1.86287	3.05418	5.24325	1.06197e-06	0.000850635
SKIL	BRCA	1.74556	2.45546	3.51734	2.77453e-08	2.2224e-05
ZNF414	BRCA	1.87917	2.77167	4.19516	1.68917e-08	1.35302e-05
ZNF709	BRCA	1.68744	2.47381	3.71204	4.48154e-07	0.000358972
GTF2F1	BRCA	1.80618	2.90156	4.85626	1.29786e-06	0.00103958
NFYA	BRCA	1.91897	3.10596	5.25215	3.07712e-07	0.000246477
KDM5A	BRCA	2.96728	4.44021	6.87711	1.20185e-17	9.62682e-15
ZNF883	BRCA	1.58844	2.29024	3.3692	1.87963e-06	0.00150558
MXD3	BRCA	1.84059	3.01962	5.18651	1.58034e-06	0.00126585
GTF2E2	BRCA	2.38272	3.36652	4.86301	7.34153e-15	5.88057e-12
ZBTB2	BRCA	2.0478	3.3037	5.57247	4.38006e-08	3.50843e-05
ZNF232	BRCA	2.41526	4.00963	7.03339	4.76739e-10	3.81868e-07
BACH1	BRCA	2.9004	4.44288	7.07655	5.50806e-16	4.41195e-13
ZSCAN29	BRCA	2.00474	3.23777	5.46568	6.49747e-08	5.20447e-05
BRD9	BRCA	1.85835	3.1256	5.53795	1.76642e-06	0.0014149
FOXM1	BRCA	2.11779	3.70598	6.93032	1.7659e-07	0.000141449
KLF12	BRCA	1.73529	2.69346	4.32173	1.26263e-06	0.00101137
TRIM28	BRCA	2.67399	4.80898	9.3829	5.5452e-10	4.4417e-07
HMGXB3	BRCA	2.20462	3.92181	7.50026	1.20852e-07	9.68024e-05
ZNF584	BRCA	1.91405	2.89191	4.50306	2.45023e-08	1.96263e-05
TAF9B	BRCA	2.6826	4.43358	7.74895	9.19439e-12	7.36471e-09
NFYB	BRCA	2.27864	3.90594	7.12611	1.42429e-08	1.14086e-05
TBL1XR1	BRCA	2.08514	3.88632	7.89401	9.62631e-07	0.000771068
SAP30	BRCA	1.86817	2.99588	5.00645	4.18519e-07	0.000335234
CBX1	BRCA	1.94057	3.1389	5.30552	2.07707e-07	0.000166373
ZBTB4	BRCA	1.74419	2.55316	3.82648	1.60094e-07	0.000128235
MBD2	BRCA	1.98796	3.28807	5.71523	2.38426e-07	0.000190979
HOXD1	BRCA	2.97201	5.44108	10.9101	2.95257e-11	2.36501e-08
ZFP91	BRCA	1.9707	3.52738	6.7778	1.45507e-06	0.00116551
NKX3	BRCA	2.30517	3.94918	7.20231	9.1815e-09	7.35438e-06
CLOCK	BRCA	2.1169	3.85223	7.58269	4.13314e-07	0.000331064
CHAMP1	BRCA	2.67485	4.62839	8.58107	1.0818e-10	8.66522e-08
ZNF608	BRCA	2.19908	3.77627	6.89957	3.29384e-08	2.63836e-05
ZNF766	BRCA	4.1086	8.42644	20.0639	2.74876e-14	2.20175e-11
PRDM15	BRCA	1.97919	3.31751	5.86194	3.69319e-07	0.000295824
ZNF781	BRCA	2.0459	3.47241	6.23896	1.70987e-07	0.000136961
EED	BRCA	1.90674	3.20235	5.66775	8.1399e-07	0.000652006
SNAPC4	BRCA	2.35983	3.87112	6.68624	7.36882e-10	5.90243e-07
TSC22D2	BRCA	2.2368	4.38887	9.59317	5.82984e-07	0.000466971
ZNF83	BRCA	2.06121	3.17331	5.05861	4.57958e-09	3.66824e-06
E2F8	BRCA	2.60928	4.93031	10.2848	4.40118e-09	3.52535e-06
ZC3H8	BRCA	2.08999	3.65993	6.84724	2.69828e-07	0.000216132
SNAI1	BRCA	1.9898	3.12061	5.08295	3.65378e-08	2.92668e-05
ZNF197	BRCA	1.89524	3.14254	5.47294	7.59103e-07	0.000608042
DR1	BRCA	1.8825	3.16397	5.60285	1.19757e-06	0.00095925
WIZ	BRCA	2.17549	3.87248	7.40989	1.17282e-07	9.3943e-05
HDAC3	BRCA	3.39251	7.77929	21.9432	5.57947e-10	4.46915e-07
ZNF276	BRCA	1.81186	2.94131	4.9854	1.40608e-06	0.00112627
DDX20	BRCA	2.34879	4.59569	10.0257	1.54113e-07	0.000123444
ELF2	BRCA	2.25259	4.57082	10.4855	8.54103e-07	0.000684136
RLF	BRCA	2.34879	4.59569	10.0257	1.54113e-07	0.000123444
ZNF138	BRCA	3.23416	7.43445	21.002	2.65729e-09	2.12849e-06
SATB2	BRCA	2.6948	5.41352	12.329	1.4004e-08	1.12172e-05
ZNF839	BRCA	2.24881	4.17373	8.45026	1.70715e-07	0.000136743
MAF1	BRCA	3.12891	7.20465	20.3748	4.30622e-09	3.44928e-06
CREB3	BRCA	2.58722	5.68117	14.767	1.65511e-07	0.000132574
ELK4	BRCA	2.65591	6.16917	17.5566	2.21028e-07	0.000177043
SP140L	BRCA	4.64297	27.4065	1103.96	1.94289e-08	1.55626e-05
ZNF30	BRCA	2.76115	6.39845	18.1824	8.57257e-08	6.86663e-05
ZNF687	CESC	1.89896	2.51464	3.36908	2.94754e-12	2.36098e-09
ZFX	CESC	1.81834	2.92104	4.88844	9.56833e-07	0.000766423
CTBP1	CESC	2.60497	5.45127	13.1719	5.58752e-08	4.47561e-05
ARID4A	CESC	2.11701	3.58768	6.43883	8.52649e-08	6.82972e-05
ZFY	CESC	4.11707	8.84577	22.6447	1.78761e-13	1.43188e-10
KDM2A	CESC	2.59297	5.21746	11.898	2.56566e-08	2.05509e-05
LCORL	CESC	2.07056	3.95991	8.33227	1.66969e-06	0.00133742
HMGXB4	CESC	2.63981	4.75132	9.27967	6.40189e-10	5.12791e-07
MNX1	CESC	2.0658	3.55908	6.51905	1.96028e-07	0.000157019
PHF8	CESC	3.36715	7.29356	18.7678	1.32646e-10	1.06249e-07
YEATS4	CESC	2.09864	3.9085	7.93552	7.27808e-07	0.000582974
ZBTB11	CESC	2.30798	4.38794	9.19358	1.22532e-07	9.81485e-05
NRL	CESC	2.75151	6.85616	22.0213	3.4285e-07	0.000274623
ZNF607	CESC	3.69595	11.4342	57.3022	1.20852e-08	9.68025e-06
KDM5A	CESC	2.55024	5.9323	16.9007	4.40465e-07	0.000352813
ZNF598	CESC	2.58057	6.45319	20.7848	9.12533e-07	0.000730939
SAFB2	CESC	2.82408	7.73867	29.6174	7.22458e-07	0.000578689
CTCF	CRC	1.54555	2.22649	3.26983	3.94442e-06	0.00315948
ZNF687	CRC	1.7911	2.35335	3.12351	3.73057e-11	2.98818e-08
MAX	CRC	1.54363	2.41365	3.89664	2.90418e-05	0.0232625
SAP130	CRC	1.70011	2.60567	4.11611	2.08654e-06	0.00167132
ZBTB33	CRC	2.15214	3.91463	7.70448	2.97789e-07	0.000238529
RBFOX2	CRC	1.56788	2.17716	3.06871	6.41217e-07	0.000513615
RNF2	CRC	1.96334	3.88183	8.53203	9.0144e-06	0.00722054
ZFX	CRC	2.52426	4.18922	7.34768	1.35651e-10	1.08657e-07
HNF4A	CRC	2.06441	5.24342	17.0529	4.16968e-05	0.0333991
ATF1	CRC	2.64701	5.00196	10.4313	3.10663e-09	2.48841e-06
NR2C2	CRC	1.91746	3.0174	4.92882	1.15497e-07	9.25127e-05
ZNF770	CRC	2.09492	3.90451	7.93206	1.09508e-06	0.000877156
ARID4A	CRC	2.49986	4.15074	7.2824	2.15167e-10	1.72349e-07
ASH2L	CRC	2.09035	3.54736	6.37385	1.22578e-07	9.81853e-05
ZFY	CRC	2.87797	4.89129	8.86823	3.37807e-12	2.70584e-09
UBTF	CRC	2.40616	4.26519	8.1379	6.24675e-09	5.00365e-06
PHF21A	CRC	1.8898	3.39158	6.53035	5.5382e-06	0.0044361
HMGXB4	CRC	2.29809	3.94205	7.19774	9.83598e-09	7.87862e-06
EP400	CRC	2.2364	4.2616	8.94397	2.87144e-07	0.000230002
MNX1	CRC	1.73614	2.93295	5.21573	8.7387e-06	0.0069997
PHF8	CRC	2.91329	5.64134	12.2179	4.11502e-10	3.29613e-07
ZBTB40	CRC	2.78002	8.74856	44.2935	2.2177e-06	0.00177638
KDM5B	CRC	1.63904	2.74155	4.80837	2.42062e-05	0.0193891
ZBTB11	CRC	1.8087	3.72026	8.6162	4.99855e-05	0.0400384
TAF1	CRC	2.61907	5.74557	14.9284	1.20266e-07	9.63334e-05
RBBP5	CRC	2.09492	3.90451	7.93206	1.09508e-06	0.000877156
KMT2A	CRC	2.49377	5.81134	16.5758	7.04649e-07	0.000564424
ZSCAN31	CRC	2.04162	4.16624	9.59306	5.79621e-06	0.00464277
NFKB2	CRC	1.8087	3.72026	8.6162	4.99855e-05	0.0400384
NRL	CRC	2.13834	5.03245	14.4484	1.17998e-05	0.00945162
ZNF607	CRC	2.85953	7.11288	22.8215	1.24656e-07	9.98497e-05
RFXAP	CRC	2.46084	6.17451	19.9293	2.37843e-06	0.00190512
ZNF891	CRC	2.57306	5.64959	14.6879	1.93637e-07	0.000155103
KAT7	CRC	2.23965	5.25473	15.0568	7.44753e-06	0.00596547
NKRF	CRC	3.02287	18.3153	747.093	1.15576e-05	0.00925766
ZNF883	CRC	2.29566	5.07465	13.2487	2.0269e-06	0.00162354
ZNF232	CRC	3.08196	9.63598	48.618	4.78806e-07	0.000383524
CLOCK	CRC	2.39432	9.48395	82.2732	5.58401e-05	0.0447279
ZNF184	CRC	2.78746	16.9959	695.252	3.339e-05	0.0267454
MTF2	CRC	2.48524	9.81415	84.962	3.33743e-05	0.0267328
SATB2	CRC	3.61313	21.6214	876.88	1.21855e-06	0.000976062
ZNF707	CRC	2.78746	16.9959	695.252	3.339e-05	0.0267454
MAX	GBM	1.5055	2.06558	2.87048	1.8787e-06	0.00150484
SAP130	GBM	1.73239	2.45661	3.54691	5.16277e-08	4.13538e-05
ZFY	GBM	1.94822	3.044	4.92601	6.92563e-08	5.54743e-05
ZNF501	GBM	1.75876	2.64363	4.0807	3.43e-07	0.000274743
POLR2AphosphoS2	GBM	3.89102	8.89685	25.0683	1.47269e-11	1.17962e-08
ZNF687	HNSC	1.49668	1.74949	2.05033	2.20633e-13	1.76727e-10
MAX	HNSC	1.45611	1.83407	2.32524	5.79927e-08	4.64522e-05
SAP130	HNSC	1.5612	2.00626	2.59972	7.52664e-09	6.02884e-06
ZBTB33	HNSC	2.00228	2.7262	3.77181	2.95274e-12	2.36514e-09
POLR2G	HNSC	1.62579	2.01741	2.51859	1.63778e-11	1.31186e-08
RBFOX2	HNSC	1.75494	2.1023	2.529	1.08888e-17	8.72193e-15
SOX6	HNSC	1.46764	1.92637	2.55298	6.87636e-07	0.000550796
L3MBTL2	HNSC	1.53244	2.01944	2.68881	1.20567e-07	9.65745e-05
ZFX	HNSC	1.56115	2.01494	2.6234	1.1719e-08	9.38689e-06
ZNF770	HNSC	1.91712	2.59958	3.57833	1.90096e-11	1.52267e-08
ARID4A	HNSC	1.74401	2.27204	2.99035	5.63789e-11	4.51595e-08
ZGPAT	HNSC	1.60865	2.13304	2.8604	2.19547e-08	1.75857e-05
TBX2	HNSC	1.62402	2.18132	2.9669	2.81058e-08	2.25128e-05
ASH2L	HNSC	1.64292	2.16816	2.89294	5.00336e-09	4.00769e-06
GABPB1	HNSC	1.54919	2.07957	2.82559	1.93103e-07	0.000154676
ZFY	HNSC	1.95211	2.60604	3.52589	1.23985e-12	9.93122e-10
ZNF501	HNSC	1.50698	1.99087	2.65766	3.2442e-07	0.00025986
POLR2A	HNSC	1.68974	2.32119	3.23812	2.04004e-08	1.63408e-05
PHF21A	HNSC	1.52939	2.04468	2.76541	3.4259e-07	0.000274415
THAP11	HNSC	1.64128	2.38028	3.52873	8.58013e-07	0.000687268
POLR2AphosphoS5	HNSC	1.60492	2.30839	3.38902	1.24984e-06	0.00100113
LCORL	HNSC	1.54139	2.1525	3.05543	1.42938e-06	0.00114493
HMGXB4	HNSC	1.60341	2.16516	2.96194	6.77942e-08	5.43032e-05
ZBTB38	HNSC	1.75531	2.45554	3.49752	1.19545e-08	9.57559e-06
HNF1B	HNSC	1.59121	2.29988	3.39516	1.95818e-06	0.0015685
E4F1	HNSC	1.7468	2.46231	3.5371	2.13334e-08	1.7088e-05
ZNF48	HNSC	1.69003	2.39484	3.45947	1.25137e-07	0.000100235
PHF8	HNSC	1.85322	2.55285	3.5755	3.65768e-10	2.92981e-07
SUPT5H	HNSC	2.26338	3.22714	4.71024	3.14352e-13	2.51796e-10
YEATS4	HNSC	1.91987	2.75348	4.03848	1.18088e-09	9.45887e-07
RBPJ	HNSC	1.65712	2.49837	3.87473	2.02246e-06	0.00161999
ZBTB11	HNSC	1.9325	2.77097	4.06328	1.18174e-09	9.46577e-07
TAF1	HNSC	1.8573	2.70631	4.0408	1.3165e-08	1.05452e-05
ZNF362	HNSC	2.11252	3.21792	5.07086	8.82443e-10	7.06837e-07
ZNF350	HNSC	1.52791	2.09481	2.91304	1.09371e-06	0.00087606
MYBL2	HNSC	2.45302	4.33053	8.23577	3.25798e-09	2.60964e-06
TFDP1	HNSC	1.59244	2.22848	3.17186	4.89309e-07	0.000391937
ADNP	HNSC	1.642	2.3593	3.461	4.83494e-07	0.000387279
ZSCAN31	HNSC	1.9818	2.91144	4.39219	1.85315e-09	1.48437e-06
ZNF792	HNSC	1.97789	3.60336	7.09851	1.8691e-06	0.00149715
ZNF777	HNSC	2.06035	3.48727	6.2527	1.51031e-07	0.000120976
FOXJ3	HNSC	1.85391	3.11048	5.50083	1.53025e-06	0.00122573
NFKB2	HNSC	1.91332	2.97398	4.79292	6.68874e-08	5.35768e-05
ZNF800	HNSC	1.73148	2.68166	4.29566	1.13478e-06	0.000908959
THAP9	HNSC	1.81211	2.58177	3.75566	1.10051e-08	8.81512e-06
YEATS2	HNSC	2.08448	3.52595	6.31857	9.99958e-08	8.00966e-05
NRL	HNSC	1.8052	2.74835	4.31704	2.20889e-07	0.000176932
MXD4	HNSC	1.93463	3.33621	6.115	1.14438e-06	0.00091665
ZNF607	HNSC	2.34952	3.84732	6.63569	7.04083e-10	5.63971e-07
RFXAP	HNSC	1.87878	2.97557	4.90287	2.36752e-07	0.000189639
ZNF891	HNSC	1.74875	2.707	4.334	1.13349e-06	0.000907924
ZNF883	HNSC	1.94857	3.11131	5.18157	1.19486e-07	9.57085e-05
ZNF460	HNSC	2.1807	3.68077	6.58565	3.01355e-08	2.41386e-05
ZNF232	HNSC	1.95189	3.48592	6.68696	1.8251e-06	0.0014619
CBFB	HNSC	2.36223	4.95916	12.0095	6.66851e-07	0.000534148
AKAP8	HNSC	1.92946	3.18842	5.5384	4.5389e-07	0.000363566
TIGD6	HNSC	1.8607	3.00913	5.08522	5.81208e-07	0.000465548
NKX3	HNSC	2.23826	4.71383	11.4399	1.58399e-06	0.00126877
ZNF766	HNSC	2.22722	4.35888	9.51024	4.92349e-07	0.000394371
IRF5	HNSC	2.12099	4.16243	9.10032	1.81605e-06	0.00145466
WIZ	HNSC	2.63404	5.76146	14.9394	8.70935e-08	6.97619e-05
SATB2	HNSC	2.86036	6.22887	16.0963	1.27257e-08	1.01933e-05
PAF1	HNSC	3.18718	12.3402	105.674	9.06934e-07	0.000726454
DMTF1	HNSC	2.663	7.31046	27.9916	1.26313e-06	0.00101177
ZNF687	KIRC	1.68463	1.89957	2.14555	4.90122e-28	3.92588e-25
MAX	KIRC	1.75716	2.10223	2.52573	5.41148e-18	4.33459e-15
SAP130	KIRC	1.92246	2.30967	2.78801	6.63091e-22	5.31136e-19
ZBTB33	KIRC	1.549	1.89368	2.32662	6.14384e-11	4.92122e-08
POLR2G	KIRC	1.53828	1.77934	2.06303	5.37842e-16	4.30812e-13
RBFOX2	KIRC	1.84573	2.09072	2.37289	1.37939e-34	1.10489e-31
ARID5B	KIRC	1.50753	1.94986	2.54391	7.24723e-08	5.80503e-05
ARID1B	KIRC	1.51713	1.91353	2.43018	7.38175e-09	5.91278e-06
SOX6	KIRC	1.77475	2.20975	2.7702	2.76841e-14	2.2175e-11
NFIC	KIRC	1.56754	1.98666	2.53655	1.81032e-09	1.45007e-06
IKZF1	KIRC	1.54739	1.9997	2.607	1.85617e-08	1.48679e-05
GATAD2A	KIRC	1.46756	1.90596	2.49717	3.68994e-07	0.000295564
DPF2	KIRC	1.44533	1.80322	2.26298	4.28051e-08	3.42869e-05
HDAC1	KIRC	1.85358	2.34634	2.99455	1.94458e-14	1.55761e-11
KDM1A	KIRC	1.75398	2.18456	2.73917	9.15576e-14	7.33376e-11
ARID4B	KIRC	1.66557	2.0618	2.56783	1.72271e-12	1.37989e-09
RNF2	KIRC	1.34723	1.66786	2.07542	1.09054e-06	0.000873524
L3MBTL2	KIRC	1.95374	2.41976	3.01732	2.03775e-18	1.63224e-15
ZFX	KIRC	1.84911	2.25064	2.75412	4.37284e-18	3.50264e-15
CTBP1	KIRC	1.59076	2.00808	2.55312	5.11724e-10	4.09891e-07
TFAP4	KIRC	1.47449	1.9209	2.52532	3.85528e-07	0.000308808
VEZF1	KIRC	1.37985	1.70284	2.11202	2.2961e-07	0.000183918
ATF1	KIRC	1.69192	2.04455	2.48216	3.98985e-15	3.19587e-12
NR2C2	KIRC	1.92277	2.29612	2.75381	5.83993e-23	4.67778e-20
ZNF770	KIRC	1.43941	1.79099	2.24118	4.452e-08	3.56605e-05
ARID4A	KIRC	2.01323	2.45287	3.00572	5.29349e-22	4.24008e-19
ZGPAT	KIRC	2.00116	2.4967	3.13821	1.46999e-18	1.17746e-15
FOXA3	KIRC	1.61108	2.19744	3.04004	1.19069e-07	9.53744e-05
TBX2	KIRC	1.74598	2.18601	2.75648	3.35787e-13	2.68965e-10
ATF7	KIRC	1.4731	1.83497	2.29927	1.37743e-08	1.10332e-05
ASH2L	KIRC	2.90049	3.65237	4.64442	1.73403e-36	1.38896e-33
GABPB1	KIRC	1.88871	2.34553	2.93309	8.99741e-17	7.20693e-14
BCOR	KIRC	1.42815	1.87228	2.47768	1.69171e-06	0.00135506
ZNF592	KIRC	1.71765	2.19626	2.83247	2.13899e-11	1.71333e-08
MED1	KIRC	2.05939	2.70249	3.58956	3.35816e-15	2.68989e-12
ZFY	KIRC	2.22042	2.79784	3.5562	5.91015e-22	4.73403e-19
MXI1	KIRC	1.63338	2.15933	2.8867	7.87824e-09	6.31047e-06
UBTF	KIRC	1.92047	2.38641	2.98606	2.07403e-17	1.6613e-14
KDM2A	KIRC	1.85162	2.33266	2.96192	8.47894e-15	6.79163e-12
ZNF501	KIRC	1.78999	2.17577	2.65848	8.01944e-17	6.42357e-14
POLR2A	KIRC	2.16923	2.64651	3.2487	9.17351e-26	7.34798e-23
RXRB	KIRC	1.77144	2.40106	3.3017	9.32793e-10	7.47167e-07
JUN	KIRC	1.56016	1.95152	2.4568	7.03878e-10	5.63806e-07
HOXA3	KIRC	1.59473	2.06851	2.70808	5.31836e-09	4.26001e-06
SOX5	KIRC	1.84042	2.54319	3.57445	7.99534e-10	6.40426e-07
PHF21A	KIRC	1.79996	2.25658	2.84986	3.88362e-14	3.11078e-11
THAP11	KIRC	1.95408	2.56318	3.40174	1.36109e-13	1.09023e-10
POLR2AphosphoS5	KIRC	1.57194	2.05377	2.70963	2.22604e-08	1.78306e-05
BCL6	KIRC	1.99784	2.81219	4.03949	6.33144e-11	5.07149e-08
HDAC2	KIRC	2.00385	2.73513	3.79476	3.2098e-12	2.57105e-09
LCORL	KIRC	1.81501	2.34095	3.04871	1.83546e-12	1.4702e-09
ELF3	KIRC	1.59152	2.1287	2.88158	5.18904e-08	4.15642e-05
CREM	KIRC	1.72511	2.38966	3.36571	1.55891e-08	1.24869e-05
HMGXB4	KIRC	2.26113	2.80739	3.51191	5.55948e-25	4.45315e-22
SMARCE1	KIRC	1.71543	2.32787	3.20416	4.64363e-09	3.71955e-06
EP400	KIRC	2.18794	2.7159	3.39606	2.5118e-23	2.01196e-20
TCF7L2	KIRC	1.44129	1.91031	2.55839	1.89645e-06	0.00151906
NR2F6	KIRC	1.76704	2.44547	3.4416	5.97258e-09	4.78404e-06
ZNF574	KIRC	1.7604	2.27255	2.96164	1.18726e-11	9.50995e-09
KAT8	KIRC	2.17286	2.84163	3.76144	2.97549e-17	2.38337e-14
MGA	KIRC	1.69023	2.19179	2.86971	2.43096e-10	1.9472e-07
FOXP4	KIRC	1.77998	2.40593	3.29822	5.95034e-10	4.76623e-07
MNX1	KIRC	1.703	2.12068	2.65826	8.40608e-13	6.73327e-10
POGZ	KIRC	1.66937	2.21913	2.9852	3.59293e-09	2.87794e-06
ZBTB38	KIRC	1.84514	2.3576	3.03966	1.24278e-13	9.9547e-11
HNF1B	KIRC	1.99019	2.60413	3.44717	2.2011e-14	1.76308e-11
E4F1	KIRC	2.06469	2.5999	3.30116	7.61013e-19	6.09572e-16
E2F1	KIRC	1.4898	1.90836	2.4638	7.45009e-08	5.96752e-05
LCOR	KIRC	1.7716	2.48607	3.55371	9.47076e-09	7.58608e-06
ZNF48	KIRC	1.61724	2.09329	2.7347	2.62043e-09	2.09896e-06
PHF8	KIRC	2.7706	3.5412	4.5766	9.8093e-31	7.85725e-28
SUPT5H	KIRC	2.62448	3.20051	3.92894	4.25002e-38	3.40427e-35
TRIM24	KIRC	1.74308	2.34572	3.19957	1.21393e-09	9.72362e-07
RXRA	KIRC	1.84991	2.51742	3.47821	1.62752e-10	1.30364e-07
ZBTB40	KIRC	2.11482	2.77314	3.6813	4.01994e-16	3.21997e-13
ERF	KIRC	1.82336	2.44995	3.33738	1.27186e-10	1.01876e-07
YY1	KIRC	1.85437	2.78155	4.29527	6.05485e-08	4.84994e-05
GMEB1	KIRC	1.47747	1.90376	2.47329	1.76602e-07	0.000141459
YEATS4	KIRC	1.9109	2.46081	3.20033	3.73777e-14	2.99396e-11
ZNF331	KIRC	1.84274	2.55473	3.60392	8.87204e-10	7.10651e-07
IKZF5	KIRC	1.62853	2.16667	2.91667	1.63684e-08	1.31111e-05
IRF2	KIRC	2.40575	3.34043	4.73303	3.12325e-16	2.50172e-13
HMBOX1	KIRC	2.05199	2.76773	3.78981	1.82906e-13	1.46507e-10
ISL2	KIRC	1.90678	2.64032	3.72072	1.5973e-10	1.27944e-07
RBPJ	KIRC	1.67761	2.22963	2.99867	3.6237e-09	2.90258e-06
KDM5B	KIRC	1.68672	2.12547	2.69821	9.58097e-12	7.67436e-09
DMAP1	KIRC	2.76435	3.67909	4.97366	1.42379e-24	1.14046e-21
THRA	KIRC	1.70798	2.49752	3.73986	2.81774e-07	0.000225701
ZBTB7B	KIRC	1.52935	2.06828	2.8331	5.23555e-07	0.000419368
ZBTB11	KIRC	2.22854	2.7763	3.48552	1.30694e-23	1.04686e-20
GFI1	KIRC	1.84117	2.47313	3.368	6.50143e-11	5.20765e-08
TAF1	KIRC	2.15962	2.85359	3.82072	2.84632e-16	2.2799e-13
NFIA	KIRC	1.62929	2.35243	3.46965	1.02459e-06	0.000820699
ZNF639	KIRC	1.45567	1.86857	2.41762	2.42498e-07	0.000194241
HNRNPLL	KIRC	1.57749	2.07585	2.76028	2.96693e-08	2.37651e-05
ZNF395	KIRC	1.50428	1.91364	2.45259	2.72896e-08	2.1859e-05
ZNF788	KIRC	1.89809	2.58078	3.56297	4.21752e-11	3.37823e-08
ZNF362	KIRC	1.57237	2.10882	2.86324	1.07191e-07	8.58599e-05
MLLT1	KIRC	2.54641	3.48248	4.851	7.14034e-19	5.71941e-16
ZNF350	KIRC	1.71981	2.19005	2.81209	1.03339e-11	8.27748e-09
MIXL1	KIRC	2.25611	3.29756	4.95414	4.00438e-12	3.20751e-09
NCOR1	KIRC	1.65817	2.34193	3.36976	2.02466e-07	0.000162175
GABPA	KIRC	1.52624	2.06951	2.84283	6.0562e-07	0.000485102
RBBP5	KIRC	2.36952	3.07452	4.03677	3.23488e-21	2.59114e-18
POLR2H	KIRC	2.49079	3.15891	4.0454	2.12426e-26	1.70153e-23
RB1	KIRC	1.60377	2.31732	3.4197	1.38325e-06	0.00110798
HOMEZ	KIRC	2.02057	2.98277	4.52675	8.96669e-10	7.18232e-07
FOXK1	KIRC	1.83487	2.68896	4.04078	2.83863e-08	2.27374e-05
GATAD1	KIRC	2.33234	3.32115	4.84182	6.60144e-14	5.28776e-11
HNF1A	KIRC	1.9389	2.68312	3.77946	5.65715e-11	4.53138e-08
TBP	KIRC	1.78843	2.6701	4.09811	1.57542e-07	0.000126191
HMG20A	KIRC	2.01573	3.12586	5.02814	1.39252e-08	1.11541e-05
DRAP1	KIRC	1.70402	2.37758	3.37562	3.81798e-08	3.0582e-05
MYBL2	KIRC	2.75664	4.1005	6.30394	4.88216e-16	3.91061e-13
NFRKB	KIRC	1.82214	2.4424	3.31819	8.12928e-11	6.51155e-08
ZNF614	KIRC	2.06764	2.94336	4.28412	2.71044e-11	2.17106e-08
TFDP1	KIRC	1.97031	2.48397	3.15702	6.05262e-17	4.84815e-14
ADNP	KIRC	1.55862	1.98568	2.54927	4.2865e-09	3.43349e-06
KMT2A	KIRC	2.14232	2.95462	4.14995	2.58752e-13	2.0726e-10
ZNF772	KIRC	1.96882	2.76214	3.95196	8.32206e-11	6.66597e-08
TFE3	KIRC	2.00389	3.01577	4.68075	3.43271e-09	2.7496e-06
KMT2B	KIRC	2.81992	4.02939	5.90855	4.4725e-19	3.58247e-16
ZSCAN31	KIRC	2.17235	2.90286	3.93558	1.26979e-15	1.0171e-12
E2F4	KIRC	2.00402	2.83199	4.08632	6.89767e-11	5.52503e-08
TOE1	KIRC	1.88596	2.55765	3.52087	5.42782e-11	4.34768e-08
SFPQ	KIRC	2.11423	2.85665	3.92017	3.33768e-14	2.67348e-11
SMAD5	KIRC	2.92061	4.0795	5.82744	5.81514e-22	4.65793e-19
ZNF792	KIRC	2.09642	2.97006	4.29996	8.37001e-12	6.70438e-09
ZNF777	KIRC	1.75165	2.34548	3.18175	6.83916e-10	5.47816e-07
POLR2B	KIRC	1.84042	2.54319	3.57445	7.99534e-10	6.40426e-07
FOXJ3	KIRC	2.36015	3.4637	5.23105	5.66487e-13	4.53756e-10
ZNF580	KIRC	2.03509	2.88628	4.18254	5.32585e-11	4.266e-08
NFKB2	KIRC	1.89241	2.53359	3.43815	1.09469e-11	8.76845e-09
TFDP2	KIRC	1.59307	2.29192	3.36553	1.66922e-06	0.00133705
POLR2AphosphoS2	KIRC	2.24296	3.18408	4.62335	2.93726e-13	2.35275e-10
HOXA5	KIRC	2.16498	3.02739	4.31945	4.87177e-13	3.90229e-10
ETV4	KIRC	1.54925	2.17809	3.1152	1.85839e-06	0.00148857
ZNF800	KIRC	1.85955	2.53009	3.49517	1.16423e-10	9.32548e-08
MIER3	KIRC	2.33311	3.4461	5.24266	1.97385e-12	1.58105e-09
ZNF280D	KIRC	1.82466	2.45777	3.35725	1.42188e-10	1.13893e-07
THAP9	KIRC	1.45858	1.87481	2.4292	2.18926e-07	0.00017536
YEATS2	KIRC	2.25691	3.16372	4.52827	5.3948e-14	4.32123e-11
TGIF2	KIRC	1.71641	2.44029	3.53881	7.07842e-08	5.66981e-05
NRL	KIRC	1.94537	2.68291	3.76423	3.5961e-11	2.88047e-08
NCOA1	KIRC	2.19598	3.2713	5.02283	4.72881e-11	3.78778e-08
ZNF547	KIRC	2.19986	3.01202	4.19709	1.60804e-14	1.28804e-11
ZNF556	KIRC	1.88133	2.56605	3.55479	9.36175e-11	7.49876e-08
NBN	KIRC	1.59636	2.16643	2.97985	1.20487e-07	9.65104e-05
DLX6	KIRC	1.85035	2.81403	4.41628	1.02988e-07	8.2493e-05
ID3	KIRC	1.52268	2.1064	2.9581	1.64952e-06	0.00132127
NONO	KIRC	1.7146	2.37571	3.34674	2.16859e-08	1.73704e-05
ZNF607	KIRC	2.47737	3.49058	5.03051	3.48304e-16	2.78992e-13
PML	KIRC	1.91745	2.73733	3.99361	1.02244e-09	8.18974e-07
SMAD3	KIRC	1.79501	2.58085	3.79276	2.64333e-08	2.11731e-05
RFXAP	KIRC	2.14232	2.95462	4.14995	2.58752e-13	2.0726e-10
ZNF691	KIRC	1.74391	2.51053	3.69346	7.2412e-08	5.8002e-05
ZNF543	KIRC	1.42815	1.87228	2.47768	1.69171e-06	0.00135506
ZNF441	KIRC	2.06895	3.03393	4.56946	2.75262e-10	2.20485e-07
AFF1	KIRC	2.33311	3.4461	5.24266	1.97385e-12	1.58105e-09
ZBTB25	KIRC	1.85673	2.62083	3.77309	2.15935e-09	1.72964e-06
BCL3	KIRC	1.76051	2.55771	3.8037	9.25449e-08	7.41285e-05
ZNF503	KIRC	2.40944	3.62502	5.63996	1.36722e-12	1.09514e-09
ZNF274	KIRC	1.81224	2.57074	3.72119	6.81764e-09	5.46093e-06
ZNF891	KIRC	1.86409	2.58326	3.64287	4.49049e-10	3.59688e-07
KAT7	KIRC	2.1481	2.94334	4.10341	7.20845e-14	5.77397e-11
ZSCAN9	KIRC	2.34797	3.56141	5.59336	1.06246e-11	8.51028e-09
ELF4	KIRC	1.98652	2.84483	4.16727	2.66002e-10	2.13068e-07
MXD1	KIRC	1.74887	2.55472	3.82212	1.45229e-07	0.000116329
SKIL	KIRC	1.68495	2.24389	3.0247	3.00988e-09	2.41092e-06
PHF20	KIRC	1.74554	2.40902	3.37944	7.17127e-09	5.74419e-06
ZNF205	KIRC	2.33502	3.57015	5.65956	2.46029e-11	1.97069e-08
ZNF414	KIRC	1.93487	2.66894	3.74541	5.06946e-11	4.06064e-08
KDM3A	KIRC	1.78994	2.61193	3.90413	5.12133e-08	4.10219e-05
ZNF709	KIRC	1.84852	2.5458	3.56474	5.10338e-10	4.08781e-07
HIVEP1	KIRC	2.30506	3.25528	4.70023	3.979e-14	3.18718e-11
NKRF	KIRC	2.30763	3.45358	5.33623	6.81194e-12	5.45637e-09
GTF2F1	KIRC	2.04028	2.9934	4.51105	3.97301e-10	3.18238e-07
ZNF12	KIRC	1.99971	3.18953	5.30731	5.22252e-08	4.18324e-05
NFYA	KIRC	2.10113	3.06248	4.58112	8.17597e-11	6.54895e-08
KDM5A	KIRC	3.52135	4.97958	7.22785	4.79031e-28	3.83704e-25
ZNF883	KIRC	2.12198	2.95833	4.20571	9.72261e-13	7.78781e-10
ZKSCAN8	KIRC	1.60544	2.30902	3.38966	1.21265e-06	0.000971334
MXD3	KIRC	1.70482	2.43469	3.54854	1.11162e-07	8.9041e-05
CREB3L1	KIRC	1.65073	2.29833	3.254	1.2017e-07	9.62558e-05
CBX5	KIRC	2.33262	3.77563	6.41695	4.46008e-10	3.57252e-07
ZNF483	KIRC	1.6366	2.24371	3.12209	8.55876e-08	6.85557e-05
GTF2E2	KIRC	2.02773	2.66215	3.53732	9.67496e-15	7.74964e-12
ZNF598	KIRC	2.48964	3.50741	5.05446	3.54517e-16	2.83968e-13
ZBTB2	KIRC	1.71019	2.52805	3.83325	5.08472e-07	0.000407286
ZNF460	KIRC	1.61516	2.34409	3.47733	1.60188e-06	0.00128311
ZNF232	KIRC	2.35817	3.63308	5.81333	2.44364e-11	1.95736e-08
ZSCAN29	KIRC	1.90261	2.81578	4.28162	1.17636e-08	9.42266e-06
BRD9	KIRC	2.06969	3.20587	5.15202	4.35976e-09	3.49217e-06
ZBED4	KIRC	1.85385	2.88597	4.65699	1.93082e-07	0.000154659
ZNF280B	KIRC	1.84251	2.63444	3.84867	5.92462e-09	4.74562e-06
ZNF230	KIRC	1.74505	2.40084	3.35622	6.3695e-09	5.10197e-06
SRF	KIRC	1.88142	2.90284	4.63601	8.57372e-08	6.86755e-05
KLF12	KIRC	1.65073	2.29833	3.254	1.2017e-07	9.62558e-05
TRIM28	KIRC	2.78921	4.53664	7.78175	6.81313e-13	5.45731e-10
HMGXB3	KIRC	1.90481	2.78718	4.18302	6.92295e-09	5.54528e-06
ZNF584	KIRC	1.64968	2.30488	3.27601	1.36671e-07	0.000109474
ZNF784	KIRC	1.96979	2.74322	3.89237	4.78692e-11	3.83432e-08
ZNF124	KIRC	1.92445	2.9432	4.65307	3.76042e-08	3.0121e-05
ZNF335	KIRC	1.94829	2.792	4.09238	7.9465e-10	6.36515e-07
TAF9B	KIRC	2.41977	3.61512	5.57825	6.06269e-13	4.85621e-10
NFYB	KIRC	1.92409	2.90072	4.50872	2.25956e-08	1.80991e-05
BRD4	KIRC	2.01511	2.99304	4.57426	1.40263e-09	1.12351e-06
CBFB	KIRC	2.23379	3.47873	5.63477	4.26836e-10	3.41896e-07
ZNF142	KIRC	1.64469	2.34253	3.40231	3.59485e-07	0.000287947
ZNF7	KIRC	1.75054	2.75683	4.50529	1.91011e-06	0.00153
HBP1	KIRC	1.76247	2.57378	3.84984	1.02329e-07	8.19653e-05
ZBTB26	KIRC	1.94739	3.07955	5.06826	7.27752e-08	5.8293e-05
SAP30	KIRC	2.28589	3.52621	5.64841	8.22243e-11	6.58616e-08
NFYC	KIRC	1.73565	2.64747	4.16474	8.76906e-07	0.000702402
CBX1	KIRC	1.73694	2.55157	3.84215	2.28012e-07	0.000182638
ZBTB4	KIRC	2.07187	2.93655	4.25304	1.73307e-11	1.38819e-08
MBD2	KIRC	1.73875	2.67174	4.24018	9.65747e-07	0.000773563
IRF1	KIRC	1.80616	2.77041	4.38996	3.39263e-07	0.00027175
HOXD1	KIRC	2.25884	3.58333	5.93773	6.55588e-10	5.25126e-07
HINFP	KIRC	2.2631	3.43763	5.40502	5.25557e-11	4.20971e-08
TIGD6	KIRC	1.77625	2.52181	3.65295	1.86733e-08	1.49573e-05
ZNF343	KIRC	2.08089	2.89235	4.09736	2.69477e-12	2.15851e-09
NKX3	KIRC	1.81863	2.71311	4.16192	7.73414e-08	6.19505e-05
CHAMP1	KIRC	2.10809	3.23625	5.14692	1.95874e-09	1.56895e-06
ZNF776	KIRC	1.85818	2.70732	4.04175	1.26466e-08	1.01299e-05
ZNF608	KIRC	2.11577	3.17696	4.92241	3.51593e-10	2.81626e-07
ZNF766	KIRC	2.09653	3.17144	4.95475	7.95123e-10	6.36894e-07
NFKBIZ	KIRC	1.91743	3.00648	4.89522	9.83999e-08	7.88183e-05
HCFC1	KIRC	2.09492	3.44877	5.97249	4.02114e-08	3.22093e-05
PRDM15	KIRC	2.13984	3.36926	5.52649	3.19679e-09	2.56063e-06
NAIF1	KIRC	2.65607	3.88293	5.84484	5.26092e-16	4.214e-13
ZNF781	KIRC	1.96077	2.83611	4.2019	9.38468e-10	7.51713e-07
EED	KIRC	2.30821	3.58998	5.80829	8.42518e-11	6.74857e-08
MED13	KIRC	1.76404	2.75281	4.45038	1.21564e-06	0.000973731
SNAPC4	KIRC	2.32228	3.33847	4.9207	1.54697e-13	1.23912e-10
ZNF451	KIRC	1.94686	2.87838	4.37355	3.98021e-09	3.18815e-06
SSRP1	KIRC	1.73043	2.60378	4.03136	4.98014e-07	0.000398909
ZBTB10	KIRC	1.87059	2.96375	4.88456	3.30365e-07	0.000264622
ZNF224	KIRC	1.88315	2.86165	4.48821	4.96749e-08	3.97896e-05
SAFB2	KIRC	1.81757	2.60015	3.80046	1.18566e-08	9.49714e-06
NFATC3	KIRC	2.46756	3.86253	6.3068	1.07803e-11	8.63505e-09
TSC22D2	KIRC	2.63024	4.40383	7.83054	2.97904e-11	2.38621e-08
ZNF225	KIRC	2.03166	3.30933	5.65237	5.75262e-08	4.60785e-05
ZNF782	KIRC	1.92005	3.06847	5.1136	1.65307e-07	0.000132411
ZNF619	KIRC	2.03092	3.07607	4.81187	3.70566e-09	2.96824e-06
E2F8	KIRC	2.55323	4.07208	6.80684	6.526e-12	5.22732e-09
ZNF333	KIRC	2.38622	4.01184	7.1547	1.48267e-09	1.18762e-06
ZC3H8	KIRC	1.90904	3.02164	4.97672	1.53962e-07	0.000123323
ZFP1	KIRC	2.36337	3.86943	6.67294	6.69185e-10	5.36017e-07
SNAI1	KIRC	1.83922	2.61851	3.80661	5.32574e-09	4.26591e-06
CHD1	KIRC	2.1592	3.4318	5.69474	3.29954e-09	2.64293e-06
SP2	KIRC	2.47841	3.91701	6.46974	1.60609e-11	1.28648e-08
IRF5	KIRC	1.95593	2.94673	4.57714	1.05164e-08	8.42366e-06
ZNF33B	KIRC	2.0961	3.40919	5.81612	2.61943e-08	2.09816e-05
ZNF510	KIRC	1.93956	2.85164	4.30435	3.62541e-09	2.90396e-06
GLI4	KIRC	2.37557	3.8423	6.52524	2.89722e-10	2.32067e-07
MTF2	KIRC	2.03582	3.06182	4.74978	2.38297e-09	1.90876e-06
ZSCAN20	KIRC	1.8604	2.97772	4.96848	5.17114e-07	0.000414208
KLF11	KIRC	1.75054	2.75683	4.50529	1.91011e-06	0.00153
DR1	KIRC	2.55669	3.92724	6.26895	6.02847e-13	4.8288e-10
WIZ	KIRC	2.2514	3.69409	6.38076	3.47079e-09	2.7801e-06
ZIK1	KIRC	1.92818	3.05059	5.02249	1.05659e-07	8.46325e-05
HDAC3	KIRC	1.84052	2.94747	4.91985	7.6122e-07	0.000609737
ZNF276	KIRC	1.79991	2.80607	4.53278	5.77345e-07	0.000462454
IKZF4	KIRC	2.77681	4.63923	8.23183	3.2375e-12	2.59324e-09
GZF1	KIRC	1.93604	3.03423	4.939	6.75344e-08	5.40951e-05
ZNF337	KIRC	2.68339	4.11462	6.55904	4.66035e-14	3.73294e-11
DDX20	KIRC	2.36337	3.86943	6.67294	6.69185e-10	5.36017e-07
ZNF34	KIRC	2.29162	3.43052	5.30113	1.00729e-11	8.0684e-09
ELF2	KIRC	2.20228	3.83764	7.15308	6.54633e-08	5.24361e-05
ZBTB42	KIRC	2.00503	3.16643	5.20557	3.36245e-08	2.69332e-05
RLF	KIRC	1.92355	3.26828	5.8763	1.04629e-06	0.000838081
ZBTB21	KIRC	2.76995	6.04498	15.6431	3.04392e-08	2.43818e-05
SIN3B	KIRC	2.71411	5.43897	12.3659	6.82955e-09	5.47047e-06
ZNF138	KIRC	2.63121	4.54752	8.42305	1.47987e-10	1.18538e-07
DNMT1	KIRC	3.36853	6.95167	16.6258	2.7705e-11	2.21917e-08
ZZZ3	KIRC	2.47534	4.04487	6.96445	8.02651e-11	6.42924e-08
ZBTB12	KIRC	2.27956	4.32868	9.06123	2.02966e-07	0.000162576
SATB2	KIRC	2.03558	3.27827	5.52191	3.712e-08	2.97331e-05
ZNF839	KIRC	2.13965	3.51884	6.08907	1.77573e-08	1.42236e-05
MAF1	KIRC	1.98876	3.24278	5.5432	1.25821e-07	0.000100783
ZNF678	KIRC	1.95439	3.27108	5.77386	4.50679e-07	0.000360994
SOX18	KIRC	2.01769	3.47284	6.35585	3.28198e-07	0.000262887
CREB3	KIRC	2.50231	4.26294	7.74132	3.88284e-10	3.11015e-07
FUBP3	KIRC	1.91635	3.16865	5.50649	6.51259e-07	0.000521659
ZNF25	KIRC	2.69649	4.83823	9.42419	2.97162e-10	2.38026e-07
RFXANK	KIRC	2.51761	4.53112	8.84579	2.79672e-09	2.24018e-06
SP140L	KIRC	2.26455	4.43002	9.66506	4.67474e-07	0.000374446
ZNF707	KIRC	2.21071	3.67766	6.46063	1.23242e-08	9.87167e-06
ZSCAN30	KIRC	1.8898	2.9927	4.93069	2.25149e-07	0.000180344
ZFP41	KIRC	2.61614	4.93267	10.2735	3.61314e-09	2.89413e-06
ZHX3	KIRC	2.96683	8.09656	30.8992	2.6758e-07	0.000214331
GTF2A2	KIRC	2.10035	3.81534	7.49984	5.03828e-07	0.000403566
ZNF576	KIRC	2.76365	6.38937	18.1299	1.04993e-07	8.40992e-05
MBD4	KIRC	2.40425	4.84891	11.0752	1.70228e-07	0.000136353
ZNF30	KIRC	3.41297	7.37524	18.946	8.67879e-11	6.95171e-08
PAF1	KIRC	2.8304	5.66022	12.8503	2.67846e-09	2.14545e-06
CSDE1	KIRC	2.6604	5.16053	11.1878	5.01063e-09	4.01352e-06
ZNF737	KIRC	3.0674	7.05518	19.9388	9.35411e-09	7.49264e-06
RARG	KIRC	2.12092	4.1646	9.10839	1.69206e-06	0.00135534
ZNF101	KIRC	2.96623	6.83403	19.3356	1.48522e-08	1.18966e-05
DMTF1	KIRC	2.87677	5.55913	12.0202	4.84928e-10	3.88428e-07
ZNF445	KIRC	3.64744	21.7944	883.281	1.20919e-06	0.000968565
SREBF2	KIRC	3.76558	22.4561	909.209	6.86345e-07	0.000549762
ZNF687	KIRP	1.55655	1.81075	2.11154	1.04719e-15	8.38796e-13
MAX	KIRP	1.57545	1.95519	2.44022	1.28815e-10	1.03181e-07
SAP130	KIRP	2.20348	2.80317	3.59897	2.95632e-20	2.36801e-17
POLR2G	KIRP	1.87517	2.27002	2.76154	2.21673e-19	1.7756e-16
RBFOX2	KIRP	1.98219	2.35107	2.79932	6.79561e-26	5.44328e-23
SOX6	KIRP	1.55412	2.00307	2.60311	1.46368e-08	1.17241e-05
KDM1A	KIRP	1.58051	2.05811	2.70478	1.34803e-08	1.07977e-05
ARID4B	KIRP	1.4545	1.90622	2.52123	8.68088e-07	0.000695339
L3MBTL2	KIRP	1.55723	1.99302	2.57048	6.86194e-09	5.49641e-06
ZFX	KIRP	2.08366	2.72261	3.59819	8.75896e-16	7.01592e-13
PKNOX1	KIRP	1.57077	2.24703	3.2757	1.89374e-06	0.00151689
VEZF1	KIRP	1.60322	2.12523	2.84783	2.46518e-08	1.97461e-05
ATF1	KIRP	1.55742	2.0043	2.60048	1.27346e-08	1.02004e-05
NR2C2	KIRP	1.82608	2.26929	2.83846	2.64735e-15	2.12053e-12
ARID4A	KIRP	1.67485	2.16625	2.82739	3.43833e-10	2.75411e-07
ZGPAT	KIRP	1.55743	2.06261	2.76058	9.19043e-08	7.36153e-05
TBX2	KIRP	1.66101	2.19902	2.94364	4.06306e-09	3.25451e-06
ASH2L	KIRP	1.8982	2.47824	3.27035	4.97922e-13	3.98835e-10
GABPB1	KIRP	1.55667	2.05362	2.73686	6.77633e-08	5.42784e-05
ZFY	KIRP	1.95123	2.63425	3.60744	4.71206e-12	3.77436e-09
KDM2A	KIRP	1.63861	2.25795	3.15813	9.78031e-08	7.83403e-05
ZNF501	KIRP	1.85148	2.4148	3.18246	2.31382e-12	1.85337e-09
POLR2A	KIRP	2.67465	3.67077	5.13392	4.04186e-20	3.23753e-17
PHF21A	KIRP	1.72403	2.28894	3.0742	8.41081e-10	6.73706e-07
HMGXB4	KIRP	1.87505	2.45335	3.2448	1.54377e-12	1.23656e-09
EP400	KIRP	1.94527	2.57233	3.44257	5.97915e-13	4.7893e-10
KAT8	KIRP	1.51844	2.09275	2.92526	1.7548e-06	0.0014056
ZBTB38	KIRP	1.66533	2.30762	3.24827	6.84821e-08	5.48542e-05
HNF1B	KIRP	2.26111	3.27599	4.86812	1.51918e-12	1.21686e-09
E4F1	KIRP	1.99733	2.7402	3.82083	6.32433e-12	5.06579e-09
PHF8	KIRP	2.5293	3.48811	4.90407	5.60544e-18	4.48995e-15
SUPT5H	KIRP	2.29626	3.10018	4.25152	1.95125e-16	1.56295e-13
RXRA	KIRP	1.65629	2.44423	3.69419	1.34727e-06	0.00107917
ZBTB40	KIRP	2.18792	3.36072	5.34796	4.03608e-10	3.2329e-07
GMEB1	KIRP	1.59719	2.2243	3.14703	3.79984e-07	0.000304368
YEATS4	KIRP	1.74512	2.38464	3.30671	4.21552e-09	3.37663e-06
HMBOX1	KIRP	1.63529	2.37757	3.53204	9.06308e-07	0.000725952
ISL2	KIRP	2.03133	3.10625	4.91076	6.01541e-09	4.81835e-06
DMAP1	KIRP	2.06665	2.93524	4.25869	2.35144e-11	1.8835e-08
ZBTB11	KIRP	2.13558	2.88983	3.97079	2.61832e-14	2.09728e-11
ZNF639	KIRP	1.70531	2.37646	3.36719	3.40182e-08	2.72486e-05
MIXL1	KIRP	1.91064	3.1682	5.51756	7.43835e-07	0.000595812
RBBP5	KIRP	1.86981	2.64414	3.8129	2.15187e-09	1.72365e-06
POLR2H	KIRP	1.64669	2.24896	3.11474	4.70676e-08	3.77011e-05
NFRKB	KIRP	1.98476	2.9217	4.41434	1.75818e-09	1.40831e-06
TFDP1	KIRP	2.68096	3.75981	5.38998	1.16904e-18	9.36405e-16
ADNP	KIRP	1.7603	2.46703	3.51922	1.18384e-08	9.48256e-06
KMT2A	KIRP	1.72979	2.64555	4.17075	9.72659e-07	0.0007791
ZSCAN31	KIRP	2.11957	3.1682	4.8788	3.26134e-10	2.61234e-07
ZNF589	KIRP	1.60486	2.24203	3.18351	4.37737e-07	0.000350627
TOE1	KIRP	1.86982	2.9424	4.80581	2.33229e-07	0.000186816
FOXJ3	KIRP	2.08398	3.26254	5.30676	7.23851e-09	5.79805e-06
ZNF580	KIRP	1.83322	3.00945	5.17163	1.47033e-06	0.00117773
POLR2AphosphoS2	KIRP	2.20109	3.4374	5.58047	9.92721e-10	7.9517e-07
THAP9	KIRP	1.8354	2.61891	3.81445	7.6294e-09	6.11115e-06
YEATS2	KIRP	2.2667	3.82881	6.85372	8.73281e-09	6.99498e-06
ZNF547	KIRP	1.84523	2.88022	4.65777	3.1185e-07	0.000249792
NBN	KIRP	2.05783	3.358	5.74371	4.34395e-08	3.47951e-05
ZNF607	KIRP	2.34644	3.76319	6.31745	2.98937e-10	2.39449e-07
RFXAP	KIRP	1.80755	2.82438	4.57067	6.68005e-07	0.000535072
AFF1	KIRP	2.02321	3.55061	6.65369	5.88484e-07	0.000471376
ZNF891	KIRP	2.26176	3.71883	6.43396	3.7921e-09	3.03748e-06
SKIL	KIRP	1.79396	2.70145	4.18449	1.8886e-07	0.000151277
PHF20	KIRP	1.69826	2.53204	3.8744	8.79105e-07	0.000704163
KDM5A	KIRP	1.99667	3.01203	4.68412	5.16886e-09	4.14026e-06
ZNF883	KIRP	1.85038	2.91332	4.76023	3.38509e-07	0.000271146
CREB3L1	KIRP	1.69546	2.59569	4.09567	1.97806e-06	0.00158443
CBX5	KIRP	2.20116	4.09189	8.29358	2.53658e-07	0.00020318
ZNF460	KIRP	1.98088	3.27822	5.70073	2.23179e-07	0.000178766
BACH1	KIRP	1.85885	2.87654	4.6041	1.98355e-07	0.000158883
TAF9B	KIRP	2.3524	4.25844	8.34957	2.93356e-08	2.34978e-05
ZNF343	KIRP	1.95745	3.24154	5.63967	3.32535e-07	0.000266361
SNAPC4	KIRP	1.99511	3.50422	6.56931	8.9104e-07	0.000713723
SP2	KIRP	2.44338	4.77227	10.3998	5.89804e-08	4.72433e-05
ZNF510	KIRP	1.98088	3.27822	5.70073	2.23179e-07	0.000178766
SIN3B	KIRP	2.69706	7.42635	28.4697	1.53882e-06	0.0012326
DNMT1	KIRP	2.77047	6.90856	22.2119	2.69749e-07	0.000216069
PAF1	KIRP	2.89937	7.94611	30.4036	3.2995e-07	0.00026429
CTCF	LGG	1.33722	1.50113	1.68722	1.38191e-12	1.10691e-09
ZNF687	LGG	1.76807	1.92717	2.10225	4.01559e-55	3.21648e-52
MAX	LGG	1.58912	1.81226	2.07082	1.58784e-20	1.27186e-17
SAP130	LGG	1.79346	2.05863	2.36866	1.37442e-27	1.10091e-24
ZBTB33	LGG	1.42525	1.65273	1.92098	4.81355e-12	3.85565e-09
POLR2G	LGG	2.10302	2.34826	2.62646	1.61651e-59	1.29483e-56
ATF3	LGG	1.55103	1.8636	2.24837	2.53294e-12	2.02888e-09
RBFOX2	LGG	1.97952	2.18372	2.41205	9.421e-62	7.54622e-59
C11orf30	LGG	1.52776	1.86319	2.28333	9.5901e-11	7.68167e-08
ARID1B	LGG	1.34052	1.60173	1.92021	8.3396e-08	6.68002e-05
SOX6	LGG	1.56431	1.82719	2.14024	1.63096e-15	1.3064e-12
NFIC	LGG	1.40915	1.69933	2.0574	7.06343e-09	5.65781e-06
GATAD2A	LGG	1.30326	1.57416	1.90851	1.2163e-06	0.000974258
DPF2	LGG	1.25418	1.47827	1.747	1.68155e-06	0.00134692
HDAC1	LGG	1.53651	1.83305	2.19508	1.8637e-12	1.49282e-09
ARID4B	LGG	1.64277	1.94668	2.31515	4.65217e-16	3.72638e-13
RNF2	LGG	1.50511	1.77572	2.10162	1.18326e-12	9.47791e-10
L3MBTL2	LGG	1.52642	1.77205	2.06247	4.4059e-15	3.52912e-12
ZFX	LGG	1.76941	2.0414	2.36131	3.56304e-25	2.854e-22
PKNOX1	LGG	1.47748	1.79718	2.19632	8.99381e-10	7.20404e-07
CTBP1	LGG	1.56554	1.85975	2.21721	1.27793e-13	1.02362e-10
VEZF1	LGG	1.24495	1.45602	1.70686	1.31445e-06	0.00105288
ATF1	LGG	1.68119	1.9491	2.26592	9.78257e-21	7.83584e-18
NR2C2	LGG	1.57513	1.79133	2.04107	1.49961e-20	1.20119e-17
ZNF770	LGG	1.51929	1.79498	2.12767	6.45259e-13	5.16853e-10
ARID4A	LGG	2.05493	2.3856	2.77836	7.61574e-35	6.10021e-32
ZGPAT	LGG	1.53001	1.80518	2.13669	2.01516e-13	1.61414e-10
TBX2	LGG	1.52948	1.78977	2.10039	3.3341e-14	2.67061e-11
EGR1	LGG	1.45091	1.73427	2.08051	2.53128e-10	2.02756e-07
ATF7	LGG	1.40645	1.6607	1.96682	4.98186e-10	3.99047e-07
ASH2L	LGG	1.8988	2.2347	2.63983	3.62932e-25	2.90708e-22
GABPB1	LGG	1.71499	1.99737	2.33321	5.28441e-21	4.23281e-18
ZNF592	LGG	1.27414	1.52076	1.82093	1.68204e-06	0.00134732
MED1	LGG	1.51552	1.84348	2.25284	1.4671e-10	1.17515e-07
ZFY	LGG	1.96636	2.31368	2.73253	1.61643e-27	1.29476e-24
MXI1	LGG	1.88812	2.33878	2.91673	4.52837e-17	3.62722e-14
UBTF	LGG	1.64858	1.93958	2.28951	3.88857e-17	3.11474e-14
KDM2A	LGG	1.67705	1.99663	2.38647	2.05931e-16	1.64951e-13
ZNF501	LGG	1.91554	2.23084	2.60652	2.12687e-28	1.70363e-25
POLR2A	LGG	2.22996	2.62118	3.09313	3.41073e-37	2.73199e-34
RXRB	LGG	1.38403	1.73852	2.19723	7.50932e-07	0.000601497
JUN	LGG	1.62493	1.92518	2.28909	1.50631e-15	1.20655e-12
HOXA3	LGG	1.56083	1.89084	2.30111	7.11776e-12	5.70133e-09
SOX5	LGG	1.38903	1.75613	2.23484	8.98333e-07	0.000719565
PHF21A	LGG	1.57687	1.85625	2.19202	5.73926e-15	4.59715e-12
THAP11	LGG	1.63151	1.98205	2.41978	3.27415e-13	2.6226e-10
POLR2AphosphoS5	LGG	1.84997	2.27079	2.80403	3.82283e-17	3.06208e-14
HDAC2	LGG	1.68541	2.14922	2.76372	4.2495e-11	3.40385e-08
LCORL	LGG	1.67837	2.01167	2.42143	1.02573e-15	8.21612e-13
HMGXB4	LGG	1.80575	2.13186	2.52606	1.65087e-21	1.32234e-18
EP400	LGG	1.72713	2.02396	2.37955	2.40608e-20	1.92727e-17
ZNF574	LGG	1.51621	1.81125	2.17186	6.59296e-12	5.28096e-09
KAT8	LGG	1.49459	1.81041	2.20258	1.78439e-10	1.4293e-07
MGA	LGG	1.57615	1.91524	2.33845	5.25936e-12	4.21275e-09
FOXP4	LGG	1.44437	1.80999	2.28213	5.91111e-08	4.7348e-05
MNX1	LGG	1.59925	1.89369	2.25032	6.89532e-15	5.52315e-12
POGZ	LGG	1.30492	1.58571	1.9347	1.48913e-06	0.00119279
ZBTB38	LGG	1.74406	2.10974	2.56465	3.00946e-16	2.41058e-13
HNF1B	LGG	1.73206	2.10401	2.56888	1.66161e-15	1.33095e-12
E4F1	LGG	1.76111	2.10853	2.53534	4.85251e-18	3.88686e-15
E2F1	LGG	1.87061	2.2507	2.72124	3.22219e-20	2.58097e-17
ZNF48	LGG	1.78967	2.17377	2.6542	5.65866e-17	4.53258e-14
ZNF121	LGG	1.41317	1.7284	2.1239	2.88775e-08	2.31309e-05
NRF1	LGG	1.40695	1.68565	2.02699	3.74444e-09	2.9993e-06
PHF8	LGG	2.20271	2.63096	3.15776	1.74806e-31	1.4002e-28
SUPT5H	LGG	2.44863	2.91742	3.49368	3.52379e-40	2.82255e-37
TRIM24	LGG	1.45193	1.83492	2.33487	9.14688e-08	7.32665e-05
ZBTB40	LGG	1.70348	2.12416	2.66677	9.46183e-13	7.57893e-10
ZNF768	LGG	1.60975	2.07975	2.71148	2.37525e-09	1.90257e-06
MITF	LGG	1.50188	1.93894	2.52494	8.55684e-08	6.85403e-05
ERF	LGG	1.33292	1.64981	2.05242	1.78136e-06	0.00142687
YY1	LGG	1.52752	2.03633	2.74602	3.03413e-07	0.000243034
ESRRA	LGG	1.5971	2.04285	2.63467	1.54698e-09	1.23913e-06
GMEB1	LGG	1.33026	1.61357	1.96499	4.95256e-07	0.0003967
YEATS4	LGG	1.48716	1.78485	2.15043	7.16877e-11	5.74219e-08
KLF16	LGG	1.44738	1.8118	2.28179	5.08232e-08	4.07094e-05
IKZF5	LGG	1.43954	1.77905	2.21029	2.16963e-08	1.73788e-05
IRF2	LGG	1.67918	2.14159	2.75417	5.70384e-11	4.56878e-08
ZNF263	LGG	1.50471	1.90166	2.42033	1.37673e-08	1.10276e-05
PITX1	LGG	1.42554	1.77488	2.22255	7.07804e-08	5.66951e-05
HMBOX1	LGG	1.50688	1.89366	2.39568	8.60302e-09	6.89102e-06
ISL2	LGG	1.38345	1.7554	2.24255	1.4058e-06	0.00112605
RBPJ	LGG	1.58644	1.97449	2.47281	1.10908e-10	8.88373e-08
KDM5B	LGG	1.85479	2.21697	2.66181	6.4554e-21	5.17078e-18
DMAP1	LGG	1.71812	2.0904	2.55654	3.87714e-15	3.10559e-12
ZBTB11	LGG	2.10099	2.49965	2.98753	2.82093e-29	2.25956e-26
GFI1	LGG	1.58062	2.0117	2.58028	1.52961e-09	1.22522e-06
TAF1	LGG	1.84005	2.24646	2.75808	1.50641e-17	1.20664e-14
ZNF639	LGG	1.65599	2.00199	2.43149	3.04009e-14	2.43511e-11
SPEN	LGG	1.44293	1.76762	2.17598	8.73726e-09	6.99855e-06
HNRNPLL	LGG	1.429	1.75368	2.16271	1.87887e-08	1.50498e-05
ZNF788	LGG	1.66891	2.06261	2.56473	9.75959e-13	7.81743e-10
ZNF350	LGG	1.68638	2.02441	2.4408	9.14567e-16	7.32568e-13
MIXL1	LGG	1.64848	2.19619	2.96111	7.82364e-09	6.26673e-06
NCOR1	LGG	1.52352	2.04988	2.79212	5.39087e-07	0.000431808
RBBP5	LGG	1.93556	2.36749	2.91306	1.25847e-19	1.00803e-16
RFX5	LGG	1.56879	2.16688	3.03909	5.1209e-07	0.000410184
MTA3	LGG	1.42152	1.76201	2.19589	6.90809e-08	5.53338e-05
POLR2H	LGG	1.66598	2.01125	2.43919	1.31774e-14	1.05551e-11
RB1	LGG	1.68066	2.2425	3.02934	3.57847e-09	2.86635e-06
GATAD1	LGG	1.60232	2.03322	2.59992	4.99658e-10	4.00226e-07
HNF1A	LGG	1.45263	1.81802	2.28947	3.9826e-08	3.19007e-05
TBP	LGG	2.08367	3.02122	4.49287	7.77259e-11	6.22584e-08
DRAP1	LGG	1.44034	1.88689	2.4953	1.35212e-06	0.00108305
ZNF317	LGG	1.42689	1.78694	2.25158	1.06134e-07	8.50131e-05
MYBL2	LGG	1.46637	1.881	2.43205	1.51872e-07	0.000121649
NFRKB	LGG	1.6594	2.12	2.7312	1.5872e-10	1.27135e-07
ZNF710	LGG	1.65516	2.09822	2.68063	6.78639e-11	5.4359e-08
TFDP1	LGG	1.91421	2.29415	2.7621	3.63336e-22	2.91032e-19
HNRNPL	LGG	1.46405	1.84151	2.33155	3.94893e-08	3.1631e-05
ADNP	LGG	1.6263	1.99007	2.44825	1.39189e-12	1.11491e-09
KMT2A	LGG	1.89459	2.44308	3.18183	9.10556e-14	7.29355e-11
ZNF772	LGG	1.66477	2.08148	2.62015	7.07513e-12	5.66718e-09
TFE3	LGG	1.48937	1.97484	2.64661	5.87004e-07	0.00047019
KMT2B	LGG	1.58683	2.03586	2.63409	2.72802e-09	2.18515e-06
MTA1	LGG	1.51107	1.87624	2.34339	1.89352e-09	1.51671e-06
ZSCAN31	LGG	1.87962	2.33532	2.92174	1.73141e-16	1.38686e-13
E2F4	LGG	1.49101	1.90634	2.45634	5.19732e-08	4.16305e-05
ZNF589	LGG	1.3713	1.67391	2.05245	1.52411e-07	0.000122081
TOE1	LGG	1.53627	1.95959	2.51892	9.11303e-09	7.29954e-06
SFPQ	LGG	1.92472	2.39962	3.01354	4.18065e-17	3.3487e-14
SMAD5	LGG	2.14441	2.72371	3.4917	1.88271e-19	1.50805e-16
ZNF792	LGG	1.42547	1.83285	2.37545	6.31149e-07	0.00050555
ZNF777	LGG	1.81957	2.29755	2.92433	6.10778e-14	4.89233e-11
POLR2B	LGG	1.71981	2.204	2.84985	2.22892e-11	1.78536e-08
ZNF580	LGG	1.51497	1.95528	2.54532	4.99232e-08	3.99885e-05
NFKB2	LGG	1.97079	2.47149	3.12375	1.67546e-17	1.34204e-14
POLR2AphosphoS2	LGG	2.45014	3.20491	4.24655	1.10995e-21	8.89067e-19
HOXA5	LGG	1.57464	2.00432	2.57116	2.00766e-09	1.60814e-06
CCNT2	LGG	1.62539	2.16177	2.90903	1.68607e-08	1.35054e-05
ZNF800	LGG	1.63452	2.07809	2.66287	2.12698e-10	1.70371e-07
ZNF280D	LGG	1.41714	1.76149	2.20176	1.08153e-07	8.66304e-05
THAP9	LGG	1.4174	1.71616	2.08665	7.97217e-09	6.38571e-06
YEATS2	LGG	1.53599	1.97275	2.55484	1.88221e-08	1.50765e-05
TGIF2	LGG	1.45043	1.91742	2.56089	1.28814e-06	0.0010318
NRL	LGG	2.07144	2.63694	3.3882	6.66626e-18	5.33967e-15
MXD4	LGG	1.49459	1.91854	2.48285	6.21003e-08	4.97423e-05
NCOA1	LGG	1.54647	2.06984	2.80347	2.30385e-07	0.000184538
ZNF547	LGG	1.63254	2.05108	2.5952	5.15196e-11	4.12672e-08
ZNF556	LGG	1.48334	1.85533	2.33512	1.14296e-08	9.15507e-06
ID3	LGG	1.83414	2.37501	3.10687	1.54707e-12	1.2392e-09
NONO	LGG	1.72507	2.21701	2.87527	2.95619e-11	2.36791e-08
ZNF607	LGG	1.88383	2.37634	3.02209	2.57728e-15	2.0644e-12
PML	LGG	1.54265	2.02314	2.68007	7.19728e-08	5.76502e-05
RFXAP	LGG	1.90043	2.46664	3.23548	2.05095e-13	1.64281e-10
ZNF691	LGG	1.40266	1.80722	2.34704	1.53371e-06	0.0012285
ZNF543	LGG	1.3237	1.61311	1.97411	8.86972e-07	0.000710464
ZNF441	LGG	1.59542	2.10168	2.79816	2.01139e-08	1.61112e-05
AFF1	LGG	1.82695	2.44764	3.32378	8.47733e-11	6.79034e-08
ZBTB25	LGG	1.63039	2.15462	2.8796	8.18945e-09	6.55975e-06
BCL3	LGG	1.43243	1.88373	2.50139	1.80485e-06	0.00144568
ZNF503	LGG	1.93211	2.62436	3.61999	1.5931e-11	1.27607e-08
ZNF891	LGG	2.37005	3.09056	4.08048	9.91595e-21	7.94267e-18
KAT7	LGG	1.56556	1.98317	2.53082	1.94811e-09	1.56043e-06
ZSCAN9	LGG	1.46664	1.96261	2.65644	1.83494e-06	0.00146979
ELF4	LGG	1.65249	2.18736	2.92851	5.21727e-09	4.17903e-06
MXD1	LGG	1.98232	2.57417	3.37961	1.13782e-14	9.11396e-12
SKIL	LGG	1.41852	1.77863	2.2439	2.00343e-07	0.000160475
PHF20	LGG	1.56415	1.97671	2.51622	1.45642e-09	1.16659e-06
ZNF205	LGG	1.46234	1.95275	2.63715	1.56758e-06	0.00125563
ZNF414	LGG	1.52953	1.92982	2.45196	5.46799e-09	4.37986e-06
HMGN3	LGG	1.62539	2.16177	2.90903	1.68607e-08	1.35054e-05
KDM3A	LGG	1.51145	1.99498	2.66085	2.5399e-07	0.000203446
ZNF709	LGG	1.99785	2.57236	3.34547	1.18728e-15	9.51011e-13
HIVEP1	LGG	1.99159	2.57699	3.36962	3.27429e-15	2.62271e-12
NKRF	LGG	1.78987	2.45193	3.41213	1.58528e-09	1.26981e-06
USF2	LGG	1.49971	2.00506	2.71184	6.06704e-07	0.00048597
KDM5A	LGG	2.67667	3.40106	4.36738	6.27573e-30	5.02686e-27
ZNF883	LGG	1.76507	2.25699	2.91177	3.14485e-12	2.51903e-09
MXD3	LGG	1.51158	2.0394	2.78584	8.24125e-07	0.000660124
CREB3L1	LGG	1.72761	2.24898	2.95747	1.17666e-10	9.42509e-08
GTF2E2	LGG	1.66434	2.03697	2.50661	2.32695e-13	1.86389e-10
ZNF598	LGG	1.61817	2.05541	2.63097	3.25817e-10	2.6098e-07
ZBTB2	LGG	1.82714	2.533	3.5731	1.27515e-09	1.0214e-06
ZNF460	LGG	1.66393	2.22091	3.00107	6.59275e-09	5.2808e-06
ZNF232	LGG	1.6733	2.22806	3.00282	4.25554e-09	3.40868e-06
BACH1	LGG	1.60541	2.09498	2.76111	7.4709e-09	5.98419e-06
ZSCAN29	LGG	1.98882	2.71437	3.76491	4.7856e-12	3.83327e-09
NR4A1	LGG	1.51032	2.05347	2.82918	9.55521e-07	0.000765372
ZBED4	LGG	1.72028	2.37483	3.33201	1.40475e-08	1.1252e-05
ZNF280B	LGG	1.79514	2.36461	3.15096	4.46447e-11	3.57604e-08
ZNF230	LGG	1.56769	1.9834	2.52785	1.69655e-09	1.35894e-06
KLF12	LGG	1.70749	2.21607	2.90463	1.64669e-10	1.319e-07
TRIM28	LGG	1.88236	2.71322	4.00169	3.67934e-09	2.94715e-06
ZNF584	LGG	1.41522	1.79213	2.28495	3.64485e-07	0.000291953
ZNF784	LGG	1.63903	2.08635	2.67718	1.84632e-10	1.47891e-07
ZNF124	LGG	1.50118	2.01618	2.74051	8.10817e-07	0.000649464
TAF9B	LGG	1.99107	2.68701	3.68078	1.13914e-12	9.12452e-10
NFYB	LGG	1.52513	2.09619	2.92303	1.26128e-06	0.00101029
BRD4	LGG	1.53171	2.1112	2.95324	1.08458e-06	0.000868745
CBFB	LGG	1.5347	2.0909	2.88748	6.152e-07	0.000492775
ZNF142	LGG	2.03763	2.72028	3.68252	9.48188e-14	7.59498e-11
ZNF548	LGG	1.46892	1.90992	2.50567	3.39646e-07	0.000272056
SAP30	LGG	1.86184	2.55459	3.56257	2.36426e-10	1.89377e-07
CBX1	LGG	1.52861	2.07733	2.86086	7.13813e-07	0.000571764
AKAP8	LGG	1.80187	2.36388	3.13606	1.80141e-11	1.44293e-08
ZBTB4	LGG	1.52056	1.95642	2.53854	3.74948e-08	3.00333e-05
MBD2	LGG	1.68129	2.30179	3.19902	2.52103e-08	2.01934e-05
IRF1	LGG	1.58351	2.14894	2.95577	1.65848e-07	0.000132844
HOXD1	LGG	1.59116	2.26902	3.29874	1.29187e-06	0.00103479
HINFP	LGG	1.45417	1.93392	2.60003	1.53585e-06	0.00123022
TIGD6	LGG	1.86876	2.46853	3.30066	4.18784e-12	3.35446e-09
ZNF343	LGG	1.70773	2.18587	2.82239	2.65282e-11	2.12491e-08
NKX3	LGG	1.8377	2.50759	3.47517	2.64936e-10	2.12214e-07
CLOCK	LGG	1.78643	2.55674	3.73798	2.3797e-08	1.90614e-05
CHAMP1	LGG	1.6616	2.38559	3.49705	3.38756e-07	0.000271343
ZNF776	LGG	1.8886	2.50455	3.36361	3.74764e-12	3.00186e-09
ZNF766	LGG	1.86184	2.55459	3.56257	2.36426e-10	1.89377e-07
ZKSCAN1	LGG	1.66035	2.41792	3.60227	6.82591e-07	0.000546756
AGO1	LGG	1.60494	2.07053	2.69521	2.75452e-09	2.20637e-06
HCFC1	LGG	1.75014	2.61488	4.01581	3.15944e-07	0.000253071
PRDM15	LGG	1.89429	2.69308	3.90971	1.34316e-09	1.07587e-06
NAIF1	LGG	1.91214	2.55191	3.45155	3.74592e-12	3.00048e-09
ZNF781	LGG	1.63032	2.17774	2.94456	1.63083e-08	1.30629e-05
EED	LGG	1.69606	2.27284	3.08526	3.41683e-09	2.73688e-06
SNAPC4	LGG	1.90514	2.50475	3.33241	8.76465e-13	7.02048e-10
NR0B2	LGG	1.7431	2.43787	3.47139	1.65183e-08	1.32311e-05
ZNF451	LGG	1.5063	2.02759	2.76287	7.08336e-07	0.000567377
ZBTB10	LGG	1.75357	2.54765	3.78777	9.17853e-08	7.352e-05
ZNF224	LGG	1.50968	2.00485	2.69183	3.95395e-07	0.000316712
SAFB2	LGG	1.73923	2.32327	3.14298	8.70351e-10	6.97152e-07
ZNF572	LGG	1.51189	2.08501	2.91806	1.94122e-06	0.00155492
ZNF225	LGG	2.12103	2.97852	4.26965	2.4196e-12	1.9381e-09
ZNF782	LGG	1.66567	2.33396	3.32862	1.15242e-07	9.23085e-05
ZNF619	LGG	1.59028	2.14137	2.92037	8.11032e-08	6.49637e-05
ZNF83	LGG	1.52907	2.06205	2.81601	4.63298e-07	0.000371102
E2F8	LGG	2.36289	3.53206	5.45249	2.06292e-12	1.6524e-09
ZC3H8	LGG	1.94864	2.97809	4.70499	2.6554e-08	2.12697e-05
SNAI1	LGG	2.21904	2.93479	3.93426	5.46497e-17	4.37744e-14
CHD1	LGG	1.7003	2.47351	3.68189	2.53251e-07	0.000202854
SP2	LGG	1.59342	2.18612	3.04381	2.13128e-07	0.000170715
IRF5	LGG	2.12513	2.90277	4.03264	1.005e-13	8.05002e-11
SMAD1	LGG	1.82968	2.50439	3.48265	4.15415e-10	3.32747e-07
GLI4	LGG	1.83157	2.55667	3.63486	1.6039e-09	1.28472e-06
MTF2	LGG	2.13828	2.91143	4.03042	4.48815e-14	3.59501e-11
ZSCAN20	LGG	1.63092	2.41578	3.66895	1.89511e-06	0.00151798
KLF11	LGG	1.87821	2.65988	3.84469	1.74157e-09	1.395e-06
WIZ	LGG	1.82512	2.56702	3.68051	3.96976e-09	3.17978e-06
ZIK1	LGG	2.56111	3.79299	5.79565	1.49902e-14	1.20072e-11
ZNF276	LGG	1.53488	2.10904	2.94024	9.40241e-07	0.000753133
ZNF446	LGG	1.68768	2.48191	3.74035	6.33345e-07	0.000507309
SMARCB1	LGG	2.07826	2.98408	4.38706	4.68439e-11	3.7522e-08
IKZF4	LGG	1.66809	2.31303	3.26045	5.70981e-08	4.57356e-05
ZBTB14	LGG	2.23409	3.30389	5.03174	1.41646e-11	1.13458e-08
FIP1L1	LGG	1.72049	2.39078	3.37918	1.80241e-08	1.44373e-05
ZNF34	LGG	1.61097	2.13872	2.87196	1.94982e-08	1.5618e-05
ZNF485	LGG	1.73201	2.68253	4.29678	1.54596e-06	0.00123832
DZIP1	LGG	2.45609	3.77726	6.03488	3.10646e-12	2.48827e-09
ZBTB42	LGG	2.01121	2.86508	4.17263	1.21394e-10	9.72364e-08
EEA1	LGG	1.84706	2.67742	3.97368	1.15596e-08	9.25922e-06
KLF13	LGG	2.4379	4.39433	8.58642	6.81732e-09	5.46067e-06
SIN3B	LGG	2.33367	3.73472	6.25967	2.88579e-10	2.31152e-07
ZNF138	LGG	2.18636	3.30056	5.14885	1.70696e-10	1.36727e-07
DNMT1	LGG	1.87467	2.75939	4.16926	1.54811e-08	1.24004e-05
NFAT5	LGG	1.71207	2.63243	4.17898	1.37121e-06	0.00109834
ZZZ3	LGG	1.94679	2.83036	4.21782	1.51452e-09	1.21313e-06
SATB2	LGG	1.91527	2.88745	4.48784	2.20007e-08	1.76226e-05
ATF6	LGG	1.71367	2.49205	3.70832	1.82804e-07	0.000146426
ZNF839	LGG	1.87374	2.71452	4.02673	5.78968e-09	4.63754e-06
MAF1	LGG	1.8573	3.07592	5.35163	1.35982e-06	0.00108921
ZNF678	LGG	2.16816	3.32371	5.28024	6.04291e-10	4.84037e-07
ZNF703	LGG	1.68768	2.48191	3.74035	6.33345e-07	0.000507309
CREB3	LGG	2.30697	3.65576	6.05143	2.89939e-10	2.32241e-07
ZNF25	LGG	2.52004	4.02065	6.72089	1.02394e-11	8.20178e-09
DIDO1	LGG	1.99017	3.62626	7.14371	1.73595e-06	0.0013905
ZNF615	LGG	2.36055	4.1754	7.95207	1.09875e-08	8.80096e-06
LBX2	LGG	1.90798	3.04968	5.08287	2.42638e-07	0.000194353
ZSCAN30	LGG	2.05154	3.2357	5.31441	1.5491e-08	1.24083e-05
ZFP41	LGG	2.85622	4.91874	9.08608	6.37908e-12	5.10964e-09
ZNF576	LGG	1.84652	3.02187	5.18017	1.29342e-06	0.00103603
ZNF526	LGG	2.02368	3.54176	6.62344	4.92558e-07	0.000394539
ZNF30	LGG	4.75105	9.31325	20.841	1.50277e-18	1.20372e-15
ZNF674	LGG	1.80132	2.85902	4.71904	9.95835e-07	0.000797664
CSDE1	LGG	2.02154	3.60474	6.90734	7.54709e-07	0.000604522
ZNF737	LGG	1.89274	3.17297	5.60729	9.71919e-07	0.000778507
ZNF778	LGG	2.11442	3.92862	7.96144	7.59114e-07	0.000608051
DMTF1	LGG	2.41705	4.27055	8.12636	4.67512e-09	3.74477e-06
ZNF687	LIHC	1.88942	2.37778	3.00891	4.3162e-15	3.45728e-12
MAX	LIHC	1.63835	2.2663	3.17173	1.70841e-07	0.000136844
POLR2G	LIHC	1.641	2.19163	2.95245	1.77884e-08	1.42485e-05
RBFOX2	LIHC	1.84089	2.33319	2.97432	1.37327e-13	1.09999e-10
SOX6	LIHC	1.68176	2.44927	3.62926	5.41659e-07	0.000433869
L3MBTL2	LIHC	1.71715	2.4298	3.48843	8.37516e-08	6.7085e-05
ZFX	LIHC	1.86277	2.71052	4.01782	2.26631e-08	1.81531e-05
CTBP1	LIHC	1.85964	2.8252	4.3997	1.54194e-07	0.000123509
ATF1	LIHC	1.92041	2.76567	4.05402	3.55044e-09	2.8439e-06
ARID4A	LIHC	2.56072	3.85244	5.96427	2.64688e-13	2.12015e-10
ZGPAT	LIHC	1.63036	2.38946	3.56387	1.83276e-06	0.00146804
ASH2L	LIHC	1.87541	2.75398	4.12504	2.04337e-08	1.63674e-05
ZFY	LIHC	2.88486	4.82548	8.51362	3.14978e-12	2.52297e-09
UBTF	LIHC	2.35943	3.66784	5.89387	1.29427e-10	1.03671e-07
KDM2A	LIHC	1.926	3.17685	5.45357	8.37184e-07	0.000670585
ZNF501	LIHC	2.54813	3.88704	6.1164	1.14235e-12	9.15019e-10
POLR2A	LIHC	1.97356	3.1243	5.11062	9.60632e-08	7.69466e-05
PHF21A	LIHC	1.69699	2.4594	3.62549	4.63788e-07	0.000371494
HMGXB4	LIHC	1.91485	2.88679	4.45698	4.04108e-08	3.23691e-05
ZNF574	LIHC	1.91284	3.19355	5.56174	9.22272e-07	0.00073874
ZBTB38	LIHC	2.11545	3.39741	5.66192	2.11785e-08	1.6964e-05
E4F1	LIHC	1.8164	2.76337	4.30795	3.38775e-07	0.000271358
E2F1	LIHC	2.0143	3.31304	5.67461	2.30275e-07	0.00018445
ZNF48	LIHC	2.49436	4.26461	7.70695	1.19635e-09	9.58277e-07
PHF8	LIHC	3.08498	5.07733	8.79129	5.80406e-14	4.64906e-11
SUPT5H	LIHC	1.93414	2.99339	4.76443	6.8571e-08	5.49254e-05
YEATS4	LIHC	1.96861	3.02181	4.76578	4.07136e-08	3.26116e-05
DMAP1	LIHC	1.99434	3.36234	5.93242	4.26672e-07	0.000341764
ZBTB11	LIHC	2.13519	3.24028	5.05281	1.24368e-09	9.9619e-07
TAF1	LIHC	2.50719	4.35296	8.02127	1.90396e-09	1.52507e-06
ZNF362	LIHC	2.06047	3.31424	5.53011	5.06301e-08	4.05547e-05
ZNF350	LIHC	1.85629	2.97708	4.93543	8.61988e-07	0.000690452
MIXL1	LIHC	2.33041	4.52095	9.6107	2.51084e-07	0.000201118
ZSCAN31	LIHC	2.00779	3.47965	6.3532	7.75208e-07	0.000620941
POLR2B	LIHC	2.19405	4.40582	9.79125	1.72198e-06	0.00137931
FOXJ3	LIHC	2.25908	4.09216	7.93417	1.45291e-07	0.000116378
NFKB2	LIHC	3.64091	7.32528	16.6941	4.60996e-12	3.69258e-09
HOXA5	LIHC	2.13781	3.96964	7.93194	1.01322e-06	0.000811591
THAP9	LIHC	2.22095	3.63142	6.19134	1.02727e-08	8.22839e-06
NRL	LIHC	2.50076	4.97409	10.9796	8.73351e-08	6.99554e-05
ZNF547	LIHC	2.63269	4.93473	10.0674	7.45772e-09	5.97364e-06
ZNF607	LIHC	3.05054	5.81748	12.2156	1.78186e-10	1.42727e-07
RFXAP	LIHC	2.30714	4.26168	8.48039	1.49047e-07	0.000119387
ZNF274	LIHC	2.33775	5.03677	12.4168	1.58396e-06	0.00126875
ZNF891	LIHC	3.65442	7.64641	18.4677	1.97588e-11	1.58268e-08
ZNF709	LIHC	2.37833	4.60715	9.78388	2.5118e-07	0.000201195
ZNF883	LIHC	2.25908	4.09216	7.93417	1.45291e-07	0.000116378
GTF2E2	LIHC	1.8598	2.93001	4.75904	4.42695e-07	0.000354599
ZNF598	LIHC	2.58927	5.31725	12.2996	7.9278e-08	6.35017e-05
KLF12	LIHC	2.18716	4.26255	9.0908	1.07707e-06	0.000862734
CBFB	LIHC	2.3973	5.15491	12.691	9.47959e-07	0.000759315
AKAP8	LIHC	2.42399	5.00155	11.6064	3.68537e-07	0.000295198
TIGD6	LIHC	2.49733	4.69698	9.60472	3.3992e-08	2.72276e-05
ZNF343	LIHC	2.13884	3.88862	7.56024	5.99756e-07	0.000480405
ZNF766	LIHC	2.56477	5.75751	15.1904	5.06673e-07	0.000405845
AGO1	LIHC	3.11634	7.87478	25.5239	6.52708e-08	5.22819e-05
ZNF781	LIHC	2.29613	4.5951	10.1877	6.44676e-07	0.000516385
SAFB2	LIHC	2.5164	5.39132	13.2393	3.36591e-07	0.00026961
IRF5	LIHC	2.70005	6.40352	18.4701	4.36322e-07	0.000349494
GZF1	LIHC	3.03608	7.6858	24.9407	1.15315e-07	9.23675e-05
ZNF337	LIHC	3.34838	7.82283	22.346	2.91165e-09	2.33223e-06
ZNF138	LIHC	2.79464	7.11928	23.1923	6.27184e-07	0.000502375
SATB2	LIHC	4.40697	13.763	69.2572	7.88997e-10	6.31986e-07
HOXA7	LIHC	3.42913	13.5699	117.523	6.62283e-07	0.000530488
FOSB	LIHC	3.54815	11.2445	57.0948	1.05747e-07	8.47037e-05
ZNF20	LIHC	3.12042	9.98221	51.0004	6.27396e-07	0.000502544
DMTF1	LIHC	2.9264	8.19345	31.7372	8.76097e-07	0.000701754
CTCF	LUAD	1.63882	2.02542	2.51792	4.33343e-12	3.47108e-09
ZNF687	LUAD	1.69243	1.98692	2.33992	9.47899e-19	7.59267e-16
MAX	LUAD	1.49951	1.89248	2.40501	1.65021e-08	1.32181e-05
SAP130	LUAD	1.95495	2.5208	3.28353	8.37537e-15	6.70867e-12
POLR2G	LUAD	1.89816	2.33187	2.88197	4.05519e-18	3.24821e-15
RBFOX2	LUAD	2.06373	2.50136	3.04833	3.70864e-24	2.97062e-21
SOX6	LUAD	1.82143	2.45351	3.35172	1.56894e-10	1.25672e-07
ARID4B	LUAD	1.56093	2.09869	2.8569	1.77987e-07	0.000142568
L3MBTL2	LUAD	1.54843	2.07285	2.80825	1.77854e-07	0.000142461
ZFX	LUAD	1.90037	2.46848	3.24036	1.94936e-13	1.56143e-10
TFAP4	LUAD	1.94268	2.8548	4.30758	4.23761e-09	3.39433e-06
ATF1	LUAD	1.61649	2.10645	2.77202	3.66041e-09	2.93199e-06
NR2C2	LUAD	1.69456	2.16228	2.78243	3.0322e-11	2.42879e-08
ZNF770	LUAD	1.63367	2.21472	3.04401	3.89588e-08	3.1206e-05
ARID4A	LUAD	1.90335	2.49446	3.3069	7.10436e-13	5.6906e-10
TBX2	LUAD	1.67008	2.25646	3.09063	1.36739e-08	1.09528e-05
ASH2L	LUAD	1.74128	2.34911	3.21318	1.51053e-09	1.20994e-06
RARA	LUAD	1.75528	2.69401	4.27145	7.63301e-07	0.000611404
MED1	LUAD	1.93665	2.86263	4.34895	4.56476e-09	3.65637e-06
ZFY	LUAD	2.54309	3.48992	4.87997	1.25014e-18	1.00136e-15
UBTF	LUAD	1.52811	2.02487	2.71253	2.01878e-07	0.000161704
KDM2A	LUAD	2.09224	2.95169	4.25323	6.18728e-12	4.95601e-09
ZNF501	LUAD	1.53472	2.08548	2.87213	5.62284e-07	0.000450389
POLR2A	LUAD	1.78551	2.44671	3.40603	1.68802e-09	1.3521e-06
PHF21A	LUAD	2.08983	2.84877	3.9478	2.07372e-13	1.66105e-10
THAP11	LUAD	1.68684	2.46664	3.69367	4.35052e-07	0.000348476
BCL6	LUAD	1.85742	3.00219	5.07133	6.18351e-07	0.000495299
HDAC2	LUAD	1.86358	2.92366	4.76364	2.3421e-07	0.000187602
LCORL	LUAD	1.67817	2.31895	3.25673	3.92569e-08	3.14448e-05
HMGXB4	LUAD	1.58311	2.11289	2.85354	6.49163e-08	5.1998e-05
EP400	LUAD	1.66845	2.28528	3.17749	2.66955e-08	2.13831e-05
TCF7L2	LUAD	1.69852	2.47033	3.67669	2.76985e-07	0.000221865
NR2F6	LUAD	1.78399	2.78025	4.4901	6.41508e-07	0.000513848
ZNF574	LUAD	1.59093	2.24147	3.21512	6.81347e-07	0.000545759
KAT8	LUAD	1.78912	2.54911	3.70806	1.66478e-08	1.33349e-05
ZBTB38	LUAD	1.91018	2.69276	3.8729	6.13618e-10	4.91508e-07
E4F1	LUAD	2.23889	3.27245	4.91651	4.67896e-12	3.74785e-09
ZNF48	LUAD	1.74023	2.54131	3.80091	1.60484e-07	0.000128548
PHF8	LUAD	2.62657	3.72632	5.41575	2.46712e-17	1.97617e-14
SUPT5H	LUAD	1.67817	2.31895	3.25673	3.92569e-08	3.14448e-05
RXRA	LUAD	1.89371	2.83644	4.37505	2.2793e-08	1.82572e-05
ZBTB40	LUAD	1.95428	3.05934	4.9759	5.27461e-08	4.22496e-05
YEATS4	LUAD	1.80654	2.55193	3.67665	6.74065e-09	5.39926e-06
IRF2	LUAD	2.01627	3.28282	5.60543	6.62683e-08	5.30809e-05
DMAP1	LUAD	2.07234	3.02109	4.52062	1.37915e-10	1.1047e-07
ZBTB11	LUAD	2.17378	3.07546	4.44747	1.49668e-12	1.19884e-09
TAF1	LUAD	1.62055	2.35022	3.48455	1.25542e-06	0.00100559
ZNF362	LUAD	1.7567	2.57802	3.87878	1.2674e-07	0.000101519
ZNF350	LUAD	1.61125	2.28661	3.30714	6.51444e-07	0.000521806
MIXL1	LUAD	2.12695	3.85696	7.57207	3.81202e-07	0.000305343
RBBP5	LUAD	1.95135	2.78322	4.0575	4.02376e-10	3.22303e-07
POLR2H	LUAD	1.76759	2.47994	3.54446	1.04857e-08	8.39902e-06
TFDP1	LUAD	1.956	2.73415	3.89597	8.5492e-11	6.84791e-08
KMT2A	LUAD	1.68386	2.55233	3.98469	1.73432e-06	0.00138919
ZNF772	LUAD	1.73143	2.70219	4.36914	1.90167e-06	0.00152323
TFE3	LUAD	2.29029	4.23304	8.54457	1.06303e-07	8.51486e-05
KMT2B	LUAD	1.77295	2.78813	4.55119	1.00772e-06	0.000807182
ZSCAN31	LUAD	1.72059	2.47722	3.64506	1.12392e-07	9.00262e-05
SFPQ	LUAD	1.87072	2.8221	4.38922	5.15873e-08	4.13214e-05
SMAD5	LUAD	1.78598	2.92551	5.01872	2.07814e-06	0.00166459
ZNF792	LUAD	1.92697	3.18248	5.52563	4.89692e-07	0.000392243
NFKB2	LUAD	2.78878	4.43215	7.38712	1.06153e-13	8.50282e-11
YEATS2	LUAD	2.82107	4.70792	8.34841	1.63708e-12	1.3113e-09
NRL	LUAD	1.90693	2.96256	4.77285	7.19796e-08	5.76556e-05
ZNF547	LUAD	1.91791	3.00505	4.89023	1.14989e-07	9.21061e-05
ZNF607	LUAD	2.65067	4.37307	7.6329	1.03979e-11	8.32875e-09
RFXAP	LUAD	2.60779	4.43177	8.03389	8.06028e-11	6.45629e-08
ZNF691	LUAD	2.21796	3.86046	7.18904	4.96161e-08	3.97425e-05
BCL3	LUAD	2.25951	4.17903	8.4394	1.03508e-07	8.29101e-05
ZNF891	LUAD	2.38552	3.9018	6.72423	3.36242e-10	2.6933e-07
ZNF709	LUAD	2.12112	3.44549	5.87291	1.34683e-08	1.07881e-05
KDM5A	LUAD	2.38203	3.73223	6.09696	4.42666e-11	3.54575e-08
ZNF883	LUAD	1.97238	3.08649	5.0184	3.59651e-08	2.8808e-05
MXD3	LUAD	2.09799	3.80713	7.47823	5.89716e-07	0.000472363
ZNF598	LUAD	2.10575	3.55801	6.37054	7.16615e-08	5.74009e-05
ZNF232	LUAD	2.41752	4.35587	8.51278	8.14008e-09	6.5202e-06
ZNF784	LUAD	2.3084	3.94348	7.17639	5.97456e-09	4.78563e-06
CBFB	LUAD	2.34519	4.44184	9.28034	9.86572e-08	7.90244e-05
SAP30	LUAD	2.59926	5.21457	11.8658	2.0437e-08	1.637e-05
ZBTB4	LUAD	1.77758	2.74798	4.39523	5.83783e-07	0.00046761
ZNF343	LUAD	2.02408	3.19286	5.24476	2.69255e-08	2.15674e-05
ZNF608	LUAD	2.44447	4.50324	9.06916	1.16541e-08	9.33492e-06
SNAPC4	LUAD	2.11375	3.68738	6.87964	1.66232e-07	0.000133152
TSC22D2	LUAD	2.37795	5.22808	13.5988	9.5053e-07	0.000761375
SNAI1	LUAD	1.93948	3.2907	5.91047	7.93518e-07	0.000635608
KLF11	LUAD	2.58501	5.99203	17.0307	3.16391e-07	0.000253429
ZNF138	LUAD	3.40044	8.35705	26.6155	1.72376e-09	1.38073e-06
SATB2	LUAD	3.22696	7.39489	20.8518	1.52499e-09	1.22151e-06
PAF1	LUAD	3.23599	12.5075	107.017	9.5083e-07	0.000761615
DMTF1	LUAD	2.94122	9.19629	46.3221	9.10466e-07	0.000729283
MAX	LUSC	1.43657	1.84764	2.39486	5.7487e-07	0.000460471
POLR2G	LUSC	1.47802	1.84404	2.31407	1.37076e-08	1.09798e-05
L3MBTL2	LUSC	1.5506	2.0835	2.83338	2.23529e-07	0.000179047
CTBP1	LUSC	1.67226	2.34645	3.3506	1.00955e-07	8.08648e-05
ATF1	LUSC	1.46482	1.92473	2.55324	7.89028e-07	0.000632011
ZNF592	LUSC	1.62622	2.3621	3.50613	1.05366e-06	0.000843983
ZFY	LUSC	1.8524	2.58875	3.68409	1.33508e-09	1.0694e-06
ZBTB38	LUSC	1.76593	2.51073	3.64139	2.31928e-08	1.85775e-05
E4F1	LUSC	1.96965	2.86633	4.27565	1.28897e-09	1.03246e-06
PHF8	LUSC	1.68207	2.37734	3.42267	1.32367e-07	0.000106026
SUPT5H	LUSC	1.56621	2.188	3.10691	9.37087e-07	0.000750607
IRF2	LUSC	1.82457	2.89736	4.78467	6.39945e-07	0.000512596
DMAP1	LUSC	1.84151	2.84708	4.55401	2.37011e-07	0.000189846
ZBTB11	LUSC	1.86731	2.5823	3.63216	4.85668e-10	3.8902e-07
ZNF777	LUSC	1.89608	3.18155	5.62696	9.26111e-07	0.000741815
YEATS2	LUSC	1.98672	3.20648	5.4104	1.1387e-07	9.12096e-05
ZNF607	LUSC	1.69882	2.61623	4.15903	1.81875e-06	0.00145682
RFXAP	LUSC	2.00445	3.45438	6.32855	4.56868e-07	0.000365951
ZNF883	LUSC	1.83662	2.88852	4.71573	4.05393e-07	0.00032472
PRDM15	LUSC	2.27792	5.03249	13.1314	2.04573e-06	0.00163863
KLF11	LUSC	2.47316	5.76036	16.4228	1.10573e-06	0.000885688
SATB2	LUSC	2.32406	5.12801	13.3698	1.31072e-06	0.00104988
CTCF	MESO	3.06234	9.67905	49.1248	8.95299e-07	0.000717135
POLR2G	OV	1.89974	3.19021	5.64665	9.37545e-07	0.000750973
ZFX	OV	2.31999	4.29605	8.68545	5.71667e-08	4.57906e-05
KDM2A	OV	2.84582	7.78922	29.789	4.41428e-07	0.000353584
ZNF574	OV	2.35755	5.1973	13.5443	1.40377e-06	0.00112442
ZBTB38	OV	2.49412	5.4803	14.2526	3.3701e-07	0.000269945
PHF8	OV	2.49412	5.4803	14.2526	3.3701e-07	0.000269945
ZNF687	PAAD	1.98202	2.33415	2.75595	7.24715e-27	5.80497e-24
MAX	PAAD	1.73424	2.19364	2.79095	5.44574e-12	4.36204e-09
SAP130	PAAD	2.42468	3.13666	4.095	1.66522e-21	1.33384e-18
ZBTB33	PAAD	1.96518	2.60073	3.47595	6.50535e-13	5.21079e-10
POLR2G	PAAD	1.91606	2.32992	2.844	3.04503e-19	2.43907e-16
RBFOX2	PAAD	2.33506	2.80005	3.37066	5.40942e-33	4.33295e-30
ARID5B	PAAD	1.63566	2.29369	3.2592	3.24967e-07	0.000260298
SOX6	PAAD	2.27247	3.02825	4.08153	1.29274e-16	1.03548e-13
GATAD2A	PAAD	1.74634	2.52348	3.70999	1.20779e-07	9.6744e-05
KDM1A	PAAD	1.73046	2.31127	3.11622	1.53951e-09	1.23315e-06
ARID4B	PAAD	1.9146	2.54127	3.40666	4.71232e-12	3.77457e-09
L3MBTL2	PAAD	1.56417	2.03426	2.66323	2.87264e-08	2.30098e-05
ZFX	PAAD	2.49073	3.24061	4.25749	4.89638e-22	3.922e-19
CTBP1	PAAD	2.12238	2.89747	4.00954	3.75976e-13	3.01156e-10
FOSL2	PAAD	1.77842	2.65697	4.05707	2.41619e-07	0.000193537
TFAP4	PAAD	1.82452	2.6536	3.93279	3.70341e-08	2.96643e-05
ATF1	PAAD	1.94942	2.50015	3.22939	1.38821e-14	1.11195e-11
NR2C2	PAAD	1.63953	2.0633	2.60985	9.15843e-11	7.3359e-08
ZNF770	PAAD	1.97841	2.6943	3.71588	1.38612e-11	1.11028e-08
ARID4A	PAAD	2.76892	3.6652	4.91341	2.79127e-24	2.2358e-21
ZGPAT	PAAD	1.85454	2.47464	3.33582	5.67655e-11	4.54692e-08
TBX2	PAAD	2.27502	3.05188	4.14345	4.15451e-16	3.32776e-13
EGR1	PAAD	1.63278	2.24937	3.13474	1.66351e-07	0.000133247
ASH2L	PAAD	2.72857	3.70102	5.09677	4.46397e-21	3.57564e-18
GABPB1	PAAD	2.17168	2.94644	4.05044	3.91306e-14	3.13436e-11
ZNF592	PAAD	1.56677	2.0978	2.83323	1.64931e-07	0.000132109
MED1	PAAD	2.15993	3.11541	4.58492	3.01625e-11	2.41602e-08
ZFY	PAAD	2.77864	3.75663	5.15504	4.3367e-22	3.4737e-19
MXI1	PAAD	2.44078	3.67512	5.69342	3.2048e-12	2.56704e-09
UBTF	PAAD	1.86338	2.50191	3.39548	6.30872e-11	5.05328e-08
KDM2A	PAAD	2.8772	3.99187	5.64045	6.49325e-21	5.2011e-18
ZNF501	PAAD	2.32881	3.10745	4.19525	2.80246e-17	2.24477e-14
POLR2A	PAAD	2.4722	3.29129	4.43639	2.75954e-19	2.21039e-16
RXRB	PAAD	1.85792	2.85716	4.514	2.21556e-07	0.000177466
JUN	PAAD	1.60902	2.16509	2.94082	7.93335e-08	6.35462e-05
HOXA3	PAAD	1.63896	2.32986	3.3607	6.44136e-07	0.000515953
SOX5	PAAD	1.81302	2.79224	4.41636	4.87751e-07	0.000390689
PHF21A	PAAD	2.06148	2.76937	3.76293	2.20084e-13	1.76287e-10
THAP11	PAAD	2.29267	3.38045	5.10634	8.89167e-12	7.12223e-09
POLR2AphosphoS5	PAAD	1.87733	2.72637	4.03561	1.1854e-08	9.49504e-06
BCL6	PAAD	2.0664	3.31892	5.53121	3.6881e-08	2.95417e-05
LCORL	PAAD	2.29571	3.1243	4.31195	1.88715e-15	1.51161e-12
ELF3	PAAD	1.90262	3.01492	4.93465	2.47371e-07	0.000198144
HMGXB4	PAAD	3.12297	4.2797	5.96679	4.68899e-25	3.75588e-22
EP400	PAAD	1.74489	2.30314	3.0666	3.99803e-10	3.20242e-07
TCF7L2	PAAD	2.44388	3.70427	5.78339	5.43894e-12	4.35659e-09
NR2F6	PAAD	2.02083	3.21938	5.31055	5.1867e-08	4.15455e-05
ZNF574	PAAD	3.00141	4.33179	6.40629	2.15575e-19	1.72675e-16
KAT8	PAAD	2.68789	3.8245	5.55782	5.57112e-17	4.46247e-14
MGA	PAAD	1.55689	2.1385	2.96881	8.15321e-07	0.000653072
FOXP4	PAAD	2.41012	3.76912	6.10385	6.28592e-11	5.03502e-08
MNX1	PAAD	1.83697	2.48492	3.39947	2.96225e-10	2.37276e-07
POGZ	PAAD	2.14379	3.20759	4.92323	5.14952e-10	4.12477e-07
ZBTB38	PAAD	2.27865	3.15716	4.44445	2.93707e-14	2.35259e-11
HNF1B	PAAD	2.33315	3.4191	5.12966	2.24688e-12	1.79975e-09
E4F1	PAAD	1.6204	2.17514	2.94686	4.84283e-08	3.87911e-05
E2F1	PAAD	1.82282	2.57693	3.6999	8.98459e-09	7.19666e-06
LCOR	PAAD	2.09941	3.33704	5.49499	1.44691e-08	1.15897e-05
ZNF48	PAAD	2.83113	4.13704	6.20265	6.55179e-17	5.24799e-14
ZNF121	PAAD	1.82935	2.56774	3.65813	4.60024e-09	3.6848e-06
PHF8	PAAD	3.4518	4.81312	6.85113	3.10439e-27	2.48661e-24
SUPT5H	PAAD	2.06465	2.69839	3.55833	4.3236e-15	3.46321e-12
RXRA	PAAD	2.08809	3.06	4.58358	3.26099e-10	2.61205e-07
ZBTB40	PAAD	2.57642	3.80034	5.75243	2.9365e-14	2.35213e-11
ZNF768	PAAD	1.7526	2.72439	4.35306	1.82139e-06	0.00145893
ERF	PAAD	2.20137	3.21811	4.80998	2.68841e-11	2.15342e-08
YEATS4	PAAD	2.88305	4.1279	6.0459	1.44284e-18	1.15572e-15
KLF16	PAAD	1.80909	2.5982	3.79656	2.41226e-08	1.93222e-05
ZNF331	PAAD	1.89013	3.02347	5.00342	4.1509e-07	0.000332487
IKZF5	PAAD	2.06048	3.08934	4.74949	1.82401e-09	1.46103e-06
ZNF217	PAAD	1.71143	2.53487	3.83046	5.53521e-07	0.000443371
IRF2	PAAD	2.53763	3.95828	6.39797	6.26875e-12	5.02127e-09
ZNF263	PAAD	2.57216	4.04494	6.60372	6.43404e-12	5.15367e-09
PITX1	PAAD	1.72881	2.61767	4.05659	9.92058e-07	0.000794639
HMBOX1	PAAD	1.7045	2.50008	3.73631	5.75093e-07	0.000460649
ISL2	PAAD	2.47359	3.93369	6.50321	6.96218e-11	5.5767e-08
RBPJ	PAAD	2.48482	3.73839	5.78748	1.29069e-12	1.03384e-09
KDM5B	PAAD	2.1708	2.9955	4.19461	2.77888e-13	2.22588e-10
DMAP1	PAAD	3.4315	5.06499	7.70126	7.38035e-22	5.91166e-19
ZBTB7B	PAAD	1.9702	3.01958	4.75749	2.94781e-08	2.3612e-05
AHDC1	PAAD	2.0664	3.31892	5.53121	3.6881e-08	2.95417e-05
ZBTB11	PAAD	2.99697	4.16705	5.904	3.91908e-22	3.13919e-19
GFI1	PAAD	1.96782	2.97612	4.61668	1.55498e-08	1.24554e-05
TAF1	PAAD	2.24259	3.25905	4.84089	6.96143e-12	5.5761e-09
ZNF639	PAAD	2.06229	2.90909	4.17356	3.27201e-11	2.62088e-08
SPEN	PAAD	1.92843	2.82336	4.21938	7.17062e-09	5.74367e-06
HNRNPLL	PAAD	2.2586	3.51464	5.6522	5.58902e-10	4.4768e-07
ZNF395	PAAD	1.82776	2.47893	3.4008	4.99666e-10	4.00232e-07
ZNF788	PAAD	2.77741	4.27944	6.82584	3.54758e-14	2.84161e-11
ZNF362	PAAD	2.03176	3.0675	4.75252	4.58076e-09	3.66919e-06
ZNF350	PAAD	2.31844	3.2313	4.58025	2.36027e-14	1.89057e-11
MIXL1	PAAD	1.9974	3.40871	6.10778	8.00206e-07	0.000640965
RBBP5	PAAD	2.39466	3.33321	4.71949	2.80366e-15	2.24573e-12
MTA3	PAAD	1.81908	2.6342	3.88517	3.20535e-08	2.56748e-05
POLR2H	PAAD	2.48426	3.41991	4.78405	6.77915e-17	5.4301e-14
ZNF609	PAAD	1.7459	2.69493	4.27026	1.56078e-06	0.00125019
HOMEZ	PAAD	2.06918	3.4757	6.11499	1.92449e-07	0.000154152
FOXO1	PAAD	2.15957	4.00231	7.98547	6.66117e-07	0.00053356
GATAD1	PAAD	2.45591	3.8055	6.09862	1.52455e-11	1.22117e-08
HNF1A	PAAD	1.84874	2.82433	4.4276	1.93297e-07	0.000154831
ZNF317	PAAD	2.03772	3.11717	4.90415	8.54603e-09	6.84537e-06
MYBL2	PAAD	1.99415	3.2779	5.61128	2.46084e-07	0.000197113
NFRKB	PAAD	2.16434	3.23717	4.96553	3.36494e-10	2.69532e-07
ZNF614	PAAD	2.19777	3.59123	6.1191	1.14376e-08	9.16149e-06
ZNF710	PAAD	1.82163	2.82514	4.50495	5.63664e-07	0.000451495
TFDP1	PAAD	2.74627	3.80372	5.36133	1.59596e-19	1.27836e-16
MEF2D	PAAD	2.3557	3.629	5.77155	5.64569e-11	4.5222e-08
KMT2A	PAAD	2.6478	3.99886	6.226	8.4519e-14	6.76997e-11
ZNF772	PAAD	3.15982	5.0172	8.31866	9.33324e-16	7.47592e-13
TFE3	PAAD	2.71381	4.85461	9.32656	4.68677e-10	3.7541e-07
KMT2B	PAAD	2.58851	4.03402	6.51652	2.46573e-12	1.97505e-09
MTA1	PAAD	1.6552	2.45634	3.71752	1.62935e-06	0.00130511
ZSCAN31	PAAD	3.03784	4.53195	6.96796	9.72758e-18	7.79179e-15
TOE1	PAAD	1.76823	2.72736	4.31894	1.06216e-06	0.000850793
SFPQ	PAAD	2.60306	3.86015	5.88015	3.02793e-14	2.42537e-11
SMAD5	PAAD	3.15197	4.86967	7.80914	9.26642e-17	7.4224e-14
ZNF792	PAAD	3.06464	5.34608	9.97373	2.99239e-12	2.3969e-09
ZNF777	PAAD	2.60959	4.13915	6.83003	6.58881e-12	5.27764e-09
POLR2B	PAAD	2.13563	3.33315	5.37324	4.99464e-09	4.00071e-06
FOXJ3	PAAD	4.40174	8.23884	17.0651	4.18182e-17	3.34964e-14
ZNF580	PAAD	2.88956	4.76454	8.26172	9.12514e-13	7.30924e-10
NFKB2	PAAD	3.27467	5.0117	7.95122	2.84077e-18	2.27546e-15
HOXA5	PAAD	2.15181	3.41553	5.61797	6.10955e-09	4.89375e-06
ZNF800	PAAD	2.1286	3.16732	4.82965	4.58458e-10	3.67225e-07
ZNF280D	PAAD	1.91	2.7978	4.18293	1.0606e-08	8.49543e-06
THAP9	PAAD	2.26638	3.26175	4.79147	2.39331e-12	1.91704e-09
YEATS2	PAAD	2.96112	4.71528	7.83521	3.0989e-14	2.48222e-11
TGIF2	PAAD	3.49426	6.60883	13.7986	9.72959e-13	7.7934e-10
NRL	PAAD	3.19937	5.18827	8.83001	3.64424e-15	2.91903e-12
MXD4	PAAD	1.86343	3.04311	5.15941	1.1898e-06	0.000953029
ZNF547	PAAD	4.26882	7.11321	12.6021	5.97991e-21	4.78991e-18
ZNF556	PAAD	2.80241	4.31597	6.88166	2.20466e-14	1.76593e-11
ARNTL	PAAD	1.92443	3.20761	5.57863	9.88372e-07	0.000791686
DLX6	PAAD	2.91795	5.43039	11.02	2.30149e-10	1.84349e-07
NONO	PAAD	2.9883	5.22041	9.74887	8.40699e-12	6.734e-09
ZNF607	PAAD	2.89527	4.48924	7.22149	8.14106e-15	6.52099e-12
PML	PAAD	2.1814	3.42925	5.57801	3.56138e-09	2.85267e-06
ZNF175	PAAD	2.16434	3.23717	4.96553	3.36494e-10	2.69532e-07
RFXAP	PAAD	2.8408	4.57969	7.72034	5.8959e-13	4.72262e-10
ZNF691	PAAD	3.35221	5.93089	11.2974	1.92316e-13	1.54045e-10
ZNF543	PAAD	1.71576	2.49242	3.68534	2.90617e-07	0.000232784
ZNF441	PAAD	2.71381	4.85461	9.32656	4.68677e-10	3.7541e-07
AFF1	PAAD	1.87709	3.03284	5.07793	7.00597e-07	0.000561178
ZNF503	PAAD	2.72353	4.78104	8.96142	2.97215e-10	2.38069e-07
ZNF274	PAAD	2.94988	4.99321	8.95405	2.12897e-12	1.7053e-09
ZNF891	PAAD	3.10251	5.40895	10.0859	1.78148e-12	1.42697e-09
KAT7	PAAD	2.87627	4.58606	7.62931	1.3664e-13	1.09449e-10
ZSCAN9	PAAD	3.98607	7.97508	18.1193	1.03987e-13	8.32933e-11
ELF4	PAAD	2.11545	3.42751	5.7752	2.58572e-08	2.07116e-05
SKIL	PAAD	2.01527	2.99023	4.54094	3.21828e-09	2.57784e-06
PHF20	PAAD	2.02961	3.12787	4.96225	1.44679e-08	1.15888e-05
ZNF205	PAAD	2.60626	4.88294	9.9563	8.1652e-09	6.54033e-06
ZNF414	PAAD	2.71867	4.3037	7.08896	9.71183e-13	7.77917e-10
KDM3A	PAAD	3.06636	5.8395	12.2489	1.18638e-10	9.50287e-08
ZNF709	PAAD	2.39188	3.81055	6.30817	2.80511e-10	2.2469e-07
HIVEP1	PAAD	2.67773	4.2027	6.85142	9.69212e-13	7.76339e-10
NKRF	PAAD	2.83137	5.57991	12.2354	4.14315e-09	3.31867e-06
ZNF12	PAAD	3.4444	7.57298	19.6893	2.80799e-10	2.2492e-07
KDM5A	PAAD	3.25	4.975	7.89579	4.71049e-18	3.7731e-15
ZNF883	PAAD	3.02341	4.67933	7.51553	1.14335e-15	9.15827e-13
ZKSCAN8	PAAD	2.73417	5.24235	11.0503	4.56249e-09	3.65455e-06
MXD3	PAAD	3.37826	6.09775	11.9303	4.86277e-13	3.89508e-10
CBX5	PAAD	3.76803	8.24257	21.3583	2.84813e-11	2.28135e-08
ZNF483	PAAD	2.12231	3.26267	5.16621	2.67376e-09	2.14168e-06
GTF2E2	PAAD	2.6178	3.72869	5.42352	2.2104e-16	1.77053e-13
ZNF598	PAAD	2.65009	4.24194	7.07903	6.73239e-12	5.39264e-09
ZNF460	PAAD	2.39593	4.31813	8.34052	2.35087e-08	1.88305e-05
ZNF232	PAAD	2.7536	4.92175	9.44777	2.84822e-10	2.28143e-07
ZBED4	PAAD	2.73004	5.39253	11.8426	1.18003e-08	9.45208e-06
ZNF280B	PAAD	2.45668	4.13928	7.34446	1.28997e-09	1.03327e-06
ZNF230	PAAD	2.11124	3.20169	4.98905	1.45259e-09	1.16353e-06
KLF12	PAAD	2.95518	4.80935	8.20859	2.13093e-13	1.70688e-10
HMGXB3	PAAD	2.12527	3.6649	6.66566	1.4465e-07	0.000115864
ZNF584	PAAD	2.23829	3.43136	5.42151	3.09604e-10	2.47993e-07
ZNF784	PAAD	3.71172	6.21804	11.0632	3.79747e-17	3.04177e-14
ZNF124	PAAD	2.34608	4.15475	7.84049	2.37497e-08	1.90235e-05
TAF9B	PAAD	2.63433	4.72039	9.07794	1.26215e-09	1.01098e-06
BRD4	PAAD	2.55473	4.58624	8.83137	3.37329e-09	2.70201e-06
CBFB	PAAD	3.2739	6.61756	15.1355	1.424e-10	1.14062e-07
ZNF142	PAAD	2.31425	3.77053	6.40972	1.88319e-09	1.50844e-06
ZNF7	PAAD	2.30847	4.47616	9.51046	4.27939e-07	0.000342779
HBP1	PAAD	2.78829	5.08422	10.0221	4.28719e-10	3.43404e-07
ZBTB26	PAAD	2.68676	5.15713	10.8794	7.62722e-09	6.1094e-06
ZNF548	PAAD	2.01225	3.23713	5.40165	8.66208e-08	6.93833e-05
SAP30	PAAD	2.20661	4.1805	8.59334	6.85905e-07	0.00054941
MIER2	PAAD	3.00051	6.09664	13.9966	2.15187e-09	1.72365e-06
CBX1	PAAD	2.06918	3.4757	6.11499	1.92449e-07	0.000154152
AKAP8	PAAD	2.28323	3.55096	5.70751	3.58526e-10	2.8718e-07
ZBTB4	PAAD	2.76729	4.29939	6.92789	9.00136e-14	7.21009e-11
HOXD1	PAAD	3.26091	6.85968	16.6313	6.10957e-10	4.89377e-07
HINFP	PAAD	2.11863	3.84961	7.48063	6.41484e-07	0.000513829
TIGD6	PAAD	2.39188	3.81055	6.30817	2.80511e-10	2.2469e-07
ZNF343	PAAD	2.44739	3.73556	5.88034	5.71646e-12	4.57888e-09
NKX3	PAAD	2.4356	4.38513	8.46326	1.45159e-08	1.16272e-05
ZNF776	PAAD	2.43377	4.16206	7.52144	3.42724e-09	2.74522e-06
ZNF608	PAAD	2.4729	4.64861	9.49926	3.65643e-08	2.9288e-05
ZNF766	PAAD	3.03443	5.95498	13.0182	4.98913e-10	3.99629e-07
AGO1	PAAD	2.32536	3.93027	6.99123	8.5033e-09	6.81114e-06
NFKBIZ	PAAD	2.47702	4.92448	10.8696	1.55206e-07	0.00012432
PRDM15	PAAD	3.2378	6.33042	13.7988	5.84625e-11	4.68284e-08
NAIF1	PAAD	2.53684	4.32803	7.80847	8.08554e-10	6.47652e-07
ZNF781	PAAD	2.45913	4.34247	8.17703	5.68834e-09	4.55636e-06
EED	PAAD	2.16127	3.66932	6.54776	8.52884e-08	6.8316e-05
MED13	PAAD	2.30847	4.47616	9.51046	4.27939e-07	0.000342779
ZFP82	PAAD	2.47359	3.93369	6.50321	6.96218e-11	5.5767e-08
SNAPC4	PAAD	2.25968	3.82585	6.8154	2.15424e-08	1.72555e-05
ZNF451	PAAD	2.39097	4.03475	7.16712	3.32611e-09	2.66421e-06
ZBTB10	PAAD	2.17408	4.3636	9.69535	1.8871e-06	0.00151157
ZNF224	PAAD	2.34608	4.15475	7.84049	2.37497e-08	1.90235e-05
SAFB2	PAAD	1.98518	3.19625	5.33689	1.32265e-07	0.000105944
TSC22D2	PAAD	2.34719	4.84914	11.2659	6.71875e-07	0.000538172
ZNF225	PAAD	2.95671	5.37343	10.5673	5.59954e-11	4.48524e-08
ZNF782	PAAD	2.167	4.22115	9.00044	1.85164e-06	0.00148316
ZNF619	PAAD	2.79339	4.98891	9.5726	1.72789e-10	1.38404e-07
E2F8	PAAD	2.42849	4.57054	9.35126	5.99904e-08	4.80523e-05
SNAI1	PAAD	2.31715	3.81839	6.58205	3.09327e-09	2.47771e-06
CHD1	PAAD	2.54133	5.70268	15.0405	5.45521e-07	0.000436962
SP2	PAAD	2.11863	3.84961	7.48063	6.41484e-07	0.000513829
IRF5	PAAD	2.36878	4.36249	8.66294	6.09575e-08	4.8827e-05
ZNF33B	PAAD	2.8764	5.49814	11.5643	9.65102e-10	7.73047e-07
ZNF510	PAAD	2.71164	4.43121	7.58806	6.78209e-12	5.43245e-09
SMAD1	PAAD	2.66218	4.8675	9.61319	1.93748e-09	1.55192e-06
AHR	PAAD	4.71749	12.7923	48.6608	6.83206e-12	5.47248e-09
STAT6	PAAD	1.99415	3.2779	5.61128	2.46084e-07	0.000197113
GLI4	PAAD	2.8821	5.67364	12.4312	2.4475e-09	1.96045e-06
MTF2	PAAD	2.28685	3.77133	6.50394	4.8896e-09	3.91657e-06
ZSCAN20	PAAD	2.21413	4.30613	9.17041	1.13991e-06	0.000913067
KLF11	PAAD	3.25076	7.17164	18.6897	1.46576e-09	1.17407e-06
DR1	PAAD	2.12005	3.77974	7.16779	3.88441e-07	0.000311141
ZIK1	PAAD	3.65684	7.34797	16.73	2.98736e-12	2.39288e-09
ZNF276	PAAD	2.73975	5.11744	10.41	1.78896e-09	1.43296e-06
IKZF4	PAAD	3.71162	7.45242	16.9755	1.71153e-12	1.37093e-09
ZBTB39	PAAD	2.24307	4.14633	8.25656	2.5803e-07	0.000206682
ZNF337	PAAD	4.56442	8.78023	18.9239	5.32711e-17	4.26701e-14
ZBTB14	PAAD	2.6286	5.20523	11.4544	3.33165e-08	2.66865e-05
ZXDC	PAAD	2.08263	3.71729	7.0552	6.13211e-07	0.000491182
ZNF34	PAAD	3.45387	6.37117	12.8425	7.24213e-13	5.80095e-10
PHF5A	PAAD	2.29289	4.74536	11.0369	1.10599e-06	0.000885895
ELF2	PAAD	2.34719	4.84914	11.2659	6.71875e-07	0.000538172
ELK1	PAAD	2.60555	5.83606	15.3736	3.2196e-07	0.00025789
SIN3B	PAAD	3.4443	9.51546	36.5859	2.78242e-08	2.22872e-05
ZNF138	PAAD	4.28518	10.6017	33.9371	1.23192e-11	9.86772e-09
DNMT1	PAAD	4.79032	14.8732	74.6677	7.25147e-11	5.80842e-08
ZNF616	PAAD	2.47703	5.56935	14.7073	9.21931e-07	0.000738467
NFAT5	PAAD	3.08769	7.79926	25.2719	6.97275e-08	5.58517e-05
ZZZ3	PAAD	2.2372	4.0503	7.84934	1.57951e-07	0.000126518
SATB2	PAAD	2.56173	4.80481	9.80488	1.34885e-08	1.08043e-05
ATF6	PAAD	2.45591	5.05679	11.7179	2.45939e-07	0.000196997
ZNF839	PAAD	3.88722	8.99195	25.5379	3.55998e-11	2.85154e-08
ZNF678	PAAD	2.86327	6.36988	16.6944	3.81557e-08	3.05627e-05
SOX18	PAAD	2.94588	5.99254	13.7665	3.68417e-09	2.95102e-06
ZNF703	PAAD	2.33962	4.41447	9.04604	1.6028e-07	0.000128384
CREB3	PAAD	2.99213	6.637	17.359	1.29696e-08	1.03886e-05
FUBP3	PAAD	2.5645	5.26455	12.1732	1.49397e-07	0.000119667
ZNF25	PAAD	3.57372	7.84071	20.3565	1.58842e-10	1.27232e-07
KLF9	PAAD	4.36472	13.6273	68.5354	8.42804e-10	6.75086e-07
ATOH8	PAAD	4.04102	15.7763	135.514	6.50526e-08	5.21071e-05
ZNF707	PAAD	2.92377	5.58345	11.7369	5.72916e-10	4.58906e-07
ZSCAN30	PAAD	3.24456	7.58837	21.689	5.70606e-09	4.57055e-06
ZFP41	PAAD	3.89869	10.6879	40.9288	1.46493e-09	1.17341e-06
THAP8	PAAD	3.83388	12.0717	61.0975	1.77223e-08	1.41956e-05
RNF219	PAAD	3.27133	12.9833	112.576	1.31203e-06	0.00105094
ZNF33A	PAAD	3.30457	10.5116	53.5073	3.60535e-07	0.000288789
ZNF775	PAAD	2.5645	5.26455	12.1732	1.49397e-07	0.000119667
TIGD3	PAAD	3.48611	8.73314	28.1301	4.0489e-09	3.24317e-06
ZNF576	PAAD	4.2586	13.316	66.9823	1.55301e-09	1.24396e-06
ZNF526	PAAD	3.17225	8.81689	34.0309	1.59826e-07	0.00012802
ZNF30	PAAD	4.79032	14.8732	74.6677	7.25147e-11	5.80842e-08
ZNF674	PAAD	2.74686	6.49848	18.7142	2.70068e-07	0.000216324
ZBTB44	PAAD	4.12431	25.0353	1020.52	3.26378e-07	0.000261429
GMEB2	PAAD	3.08188	8.58414	33.1733	2.85173e-07	0.000228423
ZNF737	PAAD	3.65586	14.3792	124.2	2.15631e-07	0.000172721
ZNF20	PAAD	2.59213	4.98676	10.5359	2.11796e-08	1.69648e-05
ZNF778	PAAD	3.62196	11.4501	58.0608	5.94236e-08	4.75983e-05
ZBTB8A	PAAD	2.69015	6.86637	22.3942	1.14413e-06	0.000916448
XBP1	PAAD	4.12431	25.0353	1020.52	3.26378e-07	0.000261429
ZNF101	PAAD	3.17225	8.81689	34.0309	1.59826e-07	0.00012802
DMTF1	PAAD	2.84904	7.23938	23.5449	3.76168e-07	0.000301311
PLSCR1	PAAD	3.19886	10.2016	52.04	6.55116e-07	0.000524748
ZNF687	PCPG	1.50323	1.83678	2.25465	4.86485e-10	3.89674e-07
MAX	PCPG	1.6355	2.22689	3.07448	4.75191e-08	3.80628e-05
SAP130	PCPG	1.76964	2.42266	3.36744	2.12946e-09	1.7057e-06
POLR2G	PCPG	2.01124	2.57249	3.32041	3.01613e-16	2.41592e-13
RBFOX2	PCPG	2.08638	2.58824	3.23296	5.96202e-21	4.77558e-18
HDAC1	PCPG	1.63553	2.41238	3.6448	1.53029e-06	0.00122576
ZFX	PCPG	1.99807	2.82796	4.08621	1.18985e-10	9.53072e-08
ARID4A	PCPG	1.64976	2.31659	3.31022	1.88306e-07	0.000150833
ASH2L	PCPG	1.90899	2.76805	4.10971	3.40497e-09	2.72738e-06
GABPB1	PCPG	1.69423	2.38519	3.41921	8.2201e-08	6.5843e-05
ZFY	PCPG	1.76519	2.60921	3.95623	1.61405e-07	0.000129285
KDM2A	PCPG	2.10633	3.23772	5.15495	1.67325e-09	1.34027e-06
ZNF501	PCPG	1.74018	2.44721	3.50489	2.21818e-08	1.77676e-05
POLR2A	PCPG	1.5268	2.10851	2.95469	1.28049e-06	0.00102567
PHF21A	PCPG	1.67802	2.48595	3.77636	8.91835e-07	0.00071436
HMGXB4	PCPG	2.02789	2.9801	4.49717	7.12605e-10	5.70796e-07
ZNF574	PCPG	1.73523	2.6909	4.31492	1.41789e-06	0.00113573
HNF1B	PCPG	2.00713	3.23824	5.46268	7.48264e-08	5.9936e-05
PHF8	PCPG	2.50779	3.92821	6.4164	5.96999e-12	4.78197e-09
SUPT5H	PCPG	1.5436	2.11824	2.94793	7.07164e-07	0.000566438
DMAP1	PCPG	1.7912	2.87582	4.81061	1.45588e-06	0.00116616
ZBTB11	PCPG	1.99103	2.91194	4.36897	9.5474e-10	7.64747e-07
TAF1	PCPG	1.7981	2.91706	4.94199	1.58911e-06	0.00127287
ZNF639	PCPG	1.85481	2.91625	4.75994	2.77895e-07	0.000222594
ZNF788	PCPG	1.95231	3.12116	5.20335	1.03641e-07	8.30161e-05
ZNF350	PCPG	1.84088	2.78423	4.33917	8.52703e-08	6.83015e-05
TFDP1	PCPG	1.84627	2.81163	4.41771	1.36873e-07	0.000109635
KMT2A	PCPG	2.6685	5.57237	13.45	3.52635e-08	2.82461e-05
ZSCAN31	PCPG	2.15532	3.39664	5.57572	2.8608e-09	2.2915e-06
NFKB2	PCPG	1.92622	3.32735	6.10693	1.54659e-06	0.00123882
POLR2AphosphoS2	PCPG	3.44397	6.61034	14.2282	8.60212e-13	6.8903e-10
THAP9	PCPG	1.81787	2.79097	4.42651	2.14619e-07	0.00017191
ZNF547	PCPG	2.08183	3.78733	7.45323	7.3658e-07	0.000590001
ZNF556	PCPG	1.87093	3.0635	5.25427	8.09668e-07	0.000648544
ZNF607	PCPG	2.10738	3.68436	6.8855	2.06408e-07	0.000165333
RFXAP	PCPG	1.99158	3.63241	7.16159	1.67581e-06	0.00134232
ZNF891	PCPG	2.45619	4.95245	11.3118	1.0237e-07	8.19986e-05
KDM5A	PCPG	1.89186	3.0291	5.05588	3.27803e-07	0.000262571
ZNF883	PCPG	2.02928	3.49549	6.40137	3.04982e-07	0.00024429
ZNF280B	PCPG	2.08875	3.98952	8.38583	1.68392e-06	0.00134882
ZNF548	PCPG	2.02172	3.68404	7.25879	1.11797e-06	0.000895494
PRDM15	PCPG	4.61782	27.2267	1096.25	2.36792e-08	1.89671e-05
SAFB2	PCPG	2.02073	3.76812	7.65692	1.71312e-06	0.00137221
SP2	PCPG	2.71944	6.77832	21.7725	3.33505e-07	0.000267138
IRF5	PCPG	2.98119	8.13953	31.0728	2.60877e-07	0.000208962
ZNF138	PCPG	4.17815	15.949	135.469	6.3125e-09	5.05631e-06
DNMT1	PCPG	2.85116	7.80544	29.8514	4.05951e-07	0.000325167
ZNF30	PCPG	4.49826	26.5593	1070.14	4.24917e-08	3.40358e-05
DMTF1	PCPG	3.34849	12.9441	110.777	4.61912e-07	0.000369991
CTCF	PRAD	1.44459	1.66424	1.92127	2.4288e-13	1.94547e-10
ZNF687	PRAD	1.65071	1.84609	2.06749	3.30273e-29	2.64549e-26
MAX	PRAD	1.61623	1.91367	2.27369	2.00037e-15	1.60229e-12
SAP130	PRAD	1.90238	2.27372	2.72934	3.56974e-22	2.85936e-19
POLR2G	PRAD	1.6381	1.88721	2.17922	2.52164e-20	2.01983e-17
RBFOX2	PRAD	1.99819	2.26943	2.58307	2.17656e-41	1.74342e-38
ARID5B	PRAD	1.4156	1.80079	2.30688	5.01551e-07	0.000401743
SOX6	PRAD	1.74096	2.12712	2.61296	4.11523e-15	3.2963e-12
HDAC1	PRAD	1.56804	1.97214	2.4972	7.62871e-10	6.1106e-07
KDM1A	PRAD	1.32771	1.61625	1.97551	7.6333e-07	0.000611427
ARID4B	PRAD	1.59271	1.95196	2.40486	9.21261e-12	7.3793e-09
L3MBTL2	PRAD	1.63379	1.9814	2.41415	2.28966e-13	1.83402e-10
ZFX	PRAD	1.74398	2.08934	2.51376	1.95047e-17	1.56232e-14
CTBP1	PRAD	1.61497	1.9997	2.49056	1.61209e-11	1.29128e-08
TFAP4	PRAD	1.45699	1.86349	2.40146	1.8365e-07	0.000147104
VEZF1	PRAD	1.28498	1.54406	1.86165	1.67669e-06	0.00134303
ATF1	PRAD	1.57707	1.89492	2.28615	7.37737e-13	5.90927e-10
NR2C2	PRAD	1.49359	1.75483	2.06771	8.627e-13	6.91023e-10
ZNF770	PRAD	1.62112	2.01079	2.5089	1.63908e-11	1.3129e-08
ARID4A	PRAD	2.0387	2.45222	2.96449	7.62206e-25	6.10527e-22
ZGPAT	PRAD	1.61945	1.98386	2.443	2.38053e-12	1.90681e-09
FOXA3	PRAD	1.57416	2.11734	2.88334	1.13022e-07	9.05307e-05
TBX2	PRAD	1.51073	1.84082	2.2534	2.19025e-10	1.75439e-07
EGR1	PRAD	1.36424	1.70915	2.15351	1.15522e-06	0.00092533
ASH2L	PRAD	1.91785	2.33117	2.84878	5.46008e-20	4.37352e-17
GABPB1	PRAD	1.66376	2.01167	2.44356	2.44483e-14	1.95831e-11
MED1	PRAD	1.60708	2.04621	2.62586	7.25002e-10	5.80727e-07
ZFY	PRAD	1.8362	2.22955	2.72115	3.88571e-18	3.11246e-15
MXI1	PRAD	1.91034	2.50387	3.31943	5.51302e-13	4.41593e-10
UBTF	PRAD	1.66107	2.03193	2.49863	2.98327e-13	2.3896e-10
KDM2A	PRAD	1.89352	2.35889	2.9596	1.51607e-16	1.21437e-13
ZNF501	PRAD	2.01111	2.45445	3.0129	1.04998e-21	8.41034e-19
POLR2A	PRAD	1.61148	1.96299	2.40301	1.64832e-12	1.32031e-09
RXRB	PRAD	1.54037	2.03769	2.72434	1.12509e-07	9.01198e-05
JUN	PRAD	1.37921	1.70836	2.12694	3.06833e-07	0.000245773
HOXA3	PRAD	1.64933	2.10935	2.72024	2.30884e-10	1.84938e-07
SOX5	PRAD	1.48151	1.98362	2.68627	1.25762e-06	0.00100736
PHF21A	PRAD	1.78748	2.22372	2.78503	1.49944e-14	1.20105e-11
THAP11	PRAD	1.38527	1.75519	2.23855	1.17185e-06	0.000938654
POLR2AphosphoS5	PRAD	1.57174	2.02191	2.62316	6.17764e-09	4.94829e-06
LCORL	PRAD	1.70083	2.13401	2.69637	2.64595e-12	2.11941e-09
ELF3	PRAD	1.48955	1.98524	2.67514	7.05748e-07	0.000565304
HMGXB4	PRAD	2.05596	2.53461	3.14547	2.59329e-21	2.07723e-18
EP400	PRAD	1.79213	2.19475	2.70296	5.0586e-16	4.05194e-13
NR2F6	PRAD	1.46879	1.98104	2.70413	1.95998e-06	0.00156995
ZNF574	PRAD	1.91241	2.39439	3.02036	2.09836e-16	1.68079e-13
KAT8	PRAD	1.7456	2.22568	2.86145	4.176e-12	3.34498e-09
MGA	PRAD	1.49692	1.91533	2.46959	5.90514e-08	4.73001e-05
FOXP4	PRAD	1.72439	2.30626	3.12324	1.37143e-09	1.09851e-06
MNX1	PRAD	1.41675	1.75342	2.18149	7.7065e-08	6.17291e-05
POGZ	PRAD	1.67763	2.16645	2.82358	2.57391e-10	2.06171e-07
ZBTB38	PRAD	1.51539	1.92818	2.47177	1.90331e-08	1.52455e-05
HNF1B	PRAD	1.87833	2.4247	3.16116	1.83757e-13	1.47189e-10
E4F1	PRAD	2.07152	2.61529	3.32998	1.07067e-18	8.57605e-16
E2F1	PRAD	1.58236	1.99181	2.52452	5.09601e-10	4.0819e-07
LCOR	PRAD	1.66993	2.28239	3.16519	2.60684e-08	2.08808e-05
ZNF48	PRAD	1.75623	2.24814	2.90297	4.63254e-12	3.71066e-09
PHF8	PRAD	2.42616	3.01744	3.78319	2.32948e-28	1.86592e-25
SUPT5H	PRAD	1.77593	2.18223	2.69721	2.14553e-15	1.71857e-12
RXRA	PRAD	1.52232	2.02721	2.72984	3.06366e-07	0.000245399
ZBTB40	PRAD	2.05598	2.68372	3.54344	1.45832e-15	1.16811e-12
ERF	PRAD	1.5759	2.05606	2.70849	1.73163e-08	1.38704e-05
YEATS4	PRAD	1.68425	2.10487	2.64831	3.59609e-12	2.88046e-09
KLF16	PRAD	1.5031	1.9514	2.55596	1.16287e-07	9.31455e-05
ZNF331	PRAD	1.50776	2.06337	2.86248	1.52503e-06	0.00122155
IKZF5	PRAD	1.58531	2.07522	2.74368	1.74658e-08	1.39901e-05
ZNF217	PRAD	1.6838	2.24357	3.02566	3.68408e-09	2.95094e-06
IRF2	PRAD	1.82475	2.47199	3.39767	2.19238e-10	1.7561e-07
ZNF263	PRAD	1.89231	2.59723	3.62315	1.00986e-10	8.08894e-08
PITX1	PRAD	1.657	2.1906	2.92848	3.86631e-09	3.09691e-06
ISL2	PRAD	1.57692	2.10167	2.83334	6.35545e-08	5.09072e-05
KDM5B	PRAD	1.50697	1.87305	2.34164	2.60936e-09	2.09009e-06
DMAP1	PRAD	2.21617	2.87642	3.77644	1.32496e-18	1.06129e-15
THRA	PRAD	1.64692	2.38983	3.54445	7.56805e-07	0.000606201
ZBTB7B	PRAD	1.59023	2.08521	2.76203	1.50552e-08	1.20592e-05
ZBTB11	PRAD	1.88043	2.32106	2.8833	3.00318e-17	2.40555e-14
GFI1	PRAD	1.56909	2.07845	2.78304	5.5115e-08	4.41471e-05
TAF1	PRAD	1.84966	2.38514	3.10555	4.3003e-13	3.44454e-10
ZNF639	PRAD	1.51539	1.92818	2.47177	1.90331e-08	1.52455e-05
SPEN	PRAD	1.39954	1.79025	2.30666	1.16753e-06	0.000935188
HNRNPLL	PRAD	1.48963	1.92272	2.50234	1.09775e-07	8.793e-05
ZNF395	PRAD	1.4101	1.77557	2.24997	3.4422e-07	0.00027572
ZNF788	PRAD	1.65015	2.1459	2.8179	1.10308e-09	8.83567e-07
ZNF362	PRAD	1.79356	2.38463	3.2097	1.14207e-10	9.14799e-08
ZNF350	PRAD	1.7392	2.19816	2.79979	1.59259e-12	1.27567e-09
RBBP5	PRAD	1.76574	2.24466	2.8769	1.26845e-12	1.01603e-09
POLR2H	PRAD	1.89239	2.38329	3.02538	1.43968e-15	1.15318e-12
HOMEZ	PRAD	1.73773	2.47104	3.58388	4.57397e-08	3.66375e-05
GATAD1	PRAD	2.11438	2.84302	3.87981	2.30431e-14	1.84575e-11
HNF1A	PRAD	1.45527	1.91446	2.54303	9.61776e-07	0.000770383
DRAP1	PRAD	1.75899	2.44433	3.4551	8.16911e-09	6.54345e-06
ZNF317	PRAD	1.6117	2.16076	2.93253	4.02108e-08	3.22088e-05
MYBL2	PRAD	1.74827	2.4384	3.46077	1.28355e-08	1.02812e-05
MEF2D	PRAD	1.66211	2.23105	3.03284	1.01315e-08	8.11535e-06
KMT2A	PRAD	2.019	2.73315	3.75638	1.02245e-12	8.18985e-10
ZNF772	PRAD	2.00361	2.72039	3.75131	1.59778e-12	1.27983e-09
TFE3	PRAD	2.31795	3.44784	5.28747	3.73619e-12	2.99269e-09
KMT2B	PRAD	1.73145	2.33185	3.18275	2.03752e-09	1.63205e-06
MTA1	PRAD	1.78511	2.37377	3.19553	1.59123e-10	1.27458e-07
ZSCAN31	PRAD	2.37119	3.11939	4.15834	8.21682e-20	6.58167e-17
E2F4	PRAD	1.75871	2.43582	3.43026	7.2833e-09	5.83392e-06
SFPQ	PRAD	1.55693	2.02886	2.66872	2.63453e-08	2.11026e-05
SMAD5	PRAD	2.18336	3.01078	4.22829	6.83087e-14	5.47153e-11
ZNF777	PRAD	1.86481	2.493	3.37716	2.30222e-11	1.84408e-08
POLR2B	PRAD	1.47736	1.98278	2.69206	1.44967e-06	0.00116119
FOXJ3	PRAD	1.91742	2.67452	3.79963	2.45374e-10	1.96544e-07
ZNF580	PRAD	1.71894	2.34671	3.25136	7.36418e-09	5.89871e-06
NFKB2	PRAD	1.68899	2.23142	2.9815	1.56887e-09	1.25667e-06
POLR2AphosphoS2	PRAD	1.96758	2.80761	4.09491	3.07943e-10	2.46662e-07
HOXA5	PRAD	1.72927	2.35361	3.25016	4.7121e-09	3.77439e-06
ETV4	PRAD	1.71337	2.43786	3.53747	8.93517e-08	7.15707e-05
MIER3	PRAD	1.73736	2.45072	3.52209	3.64353e-08	2.91847e-05
ZNF280D	PRAD	1.47067	1.92701	2.54886	5.47977e-07	0.00043893
THAP9	PRAD	1.84123	2.3569	3.04454	2.28207e-13	1.82794e-10
YEATS2	PRAD	2.00173	2.73362	3.79432	3.91003e-12	3.13194e-09
NRL	PRAD	2.08142	2.79294	3.8027	4.31e-14	3.45231e-11
ZNF547	PRAD	1.91513	2.57676	3.51609	8.37727e-12	6.71019e-09
ZNF556	PRAD	1.85718	2.48906	3.3811	3.60541e-11	2.88793e-08
DLX6	PRAD	1.79586	2.69985	4.17624	1.571e-07	0.000125837
NONO	PRAD	1.54226	2.13378	2.99714	1.13469e-06	0.000908889
ZNF607	PRAD	2.95202	4.15767	5.99645	1.43759e-21	1.15151e-18
PML	PRAD	1.60394	2.21545	3.10731	2.52031e-07	0.000201877
RFXAP	PRAD	1.92327	2.6382	3.67848	5.06094e-11	4.05382e-08
ZNF691	PRAD	1.94508	2.75335	3.97834	3.63899e-10	2.91483e-07
ZNF543	PRAD	1.64088	2.15325	2.8551	4.08151e-09	3.26929e-06
ZNF441	PRAD	1.93738	2.75425	3.99914	5.70696e-10	4.57128e-07
AFF1	PRAD	1.70175	2.41204	3.48495	7.9075e-08	6.33391e-05
ZBTB25	PRAD	1.6328	2.26083	3.18023	1.58168e-07	0.000126693
BCL3	PRAD	1.57657	2.26106	3.30699	1.83522e-06	0.00147001
ZNF503	PRAD	1.70175	2.41204	3.48495	7.9075e-08	6.33391e-05
ZNF274	PRAD	1.53064	2.0876	2.8856	7.40445e-07	0.000593096
ZNF891	PRAD	1.73088	2.337	3.1987	2.31117e-09	1.85125e-06
KAT7	PRAD	1.77688	2.3969	3.27809	6.39707e-10	5.12405e-07
ZSCAN9	PRAD	1.70128	2.42127	3.51475	1.25259e-07	0.000100332
ELF4	PRAD	1.92772	2.82117	4.23481	4.23097e-09	3.38901e-06
SKIL	PRAD	1.62686	2.16567	2.91674	1.45009e-08	1.16152e-05
PHF20	PRAD	1.50677	2.01608	2.72843	5.43318e-07	0.000435197
ZNF414	PRAD	1.90705	2.5417	3.43193	3.804e-12	3.04701e-09
KDM3A	PRAD	1.55718	2.19031	3.13393	1.7291e-06	0.00138501
ZNF709	PRAD	1.98037	2.6825	3.68901	2.88102e-12	2.3077e-09
HIVEP1	PRAD	1.82142	2.51116	3.51953	8.78967e-10	7.04053e-07
ZNF12	PRAD	2.28615	3.6654	6.15195	8.99194e-10	7.20254e-07
NFYA	PRAD	2.02608	2.9287	4.33636	2.78707e-10	2.23245e-07
KDM5A	PRAD	2.31611	3.07594	4.14269	4.80495e-18	3.84877e-15
ZNF883	PRAD	1.75025	2.34487	3.18236	8.37572e-10	6.70895e-07
ZKSCAN8	PRAD	2.04827	3.12627	4.93344	3.41988e-09	2.73932e-06
MXD3	PRAD	2.25521	3.31703	5.01846	7.94669e-12	6.3653e-09
ZNF483	PRAD	1.64452	2.2083	3.0029	1.88044e-08	1.50623e-05
GTF2E2	PRAD	1.62382	2.07781	2.68075	7.44402e-10	5.96266e-07
ZNF460	PRAD	1.74053	2.53188	3.76856	1.16055e-07	9.29598e-05
ZNF232	PRAD	2.06521	3.03058	4.56697	2.38999e-10	1.91438e-07
BACH1	PRAD	1.67786	2.37965	3.43979	1.50808e-07	0.000120797
ZSCAN29	PRAD	1.93122	2.87551	4.40427	7.97906e-09	6.39123e-06
ZBED4	PRAD	1.64289	2.42149	3.65624	1.55063e-06	0.00124205
KLF12	PRAD	1.96704	2.75099	3.92083	9.51393e-11	7.62065e-08
TRIM28	PRAD	2.0204	3.06293	4.79482	4.75921e-09	3.81212e-06
ZNF784	PRAD	1.64103	2.1702	2.90208	7.10917e-09	5.69444e-06
ZNF124	PRAD	2.09901	3.06136	4.58188	1.04405e-10	8.36284e-08
TAF9B	PRAD	1.84302	2.64879	3.89195	8.26958e-09	6.62393e-06
CBFB	PRAD	1.74675	2.61259	4.01587	4.14638e-07	0.000332125
ZNF142	PRAD	1.9885	2.80121	4.02618	7.83085e-11	6.27251e-08
HBP1	PRAD	1.57361	2.22927	3.21562	1.22341e-06	0.000979955
ZBTB26	PRAD	1.84804	2.79315	4.35031	8.44499e-08	6.76444e-05
ZNF548	PRAD	1.64506	2.26993	3.18098	7.3641e-08	5.89864e-05
SAP30	PRAD	1.6455	2.39979	3.57949	8.59181e-07	0.000688204
AKAP8	PRAD	1.57	2.17748	3.06749	7.2788e-07	0.000583032
ZBTB4	PRAD	1.9439	2.66551	3.71538	2.50502e-11	2.00652e-08
HOXD1	PRAD	2.00516	3.16915	5.21341	3.0022e-08	2.40477e-05
HINFP	PRAD	1.91888	2.82443	4.26701	6.63936e-09	5.31813e-06
TIGD6	PRAD	1.93636	2.69032	3.80582	1.09207e-10	8.74752e-08
ZNF343	PRAD	1.71157	2.31796	3.18287	4.97327e-09	3.98359e-06
NKX3	PRAD	1.7425	2.56129	3.85868	2.05555e-07	0.00016465
CLOCK	PRAD	1.9704	3.18079	5.36778	1.07942e-07	8.64614e-05
ZNF766	PRAD	2.46948	3.76989	5.96826	1.73054e-12	1.38616e-09
AGO1	PRAD	1.83339	2.53524	3.56537	9.78646e-10	7.83895e-07
NFKBIZ	PRAD	1.86824	2.96273	4.8864	2.9627e-07	0.000237312
PRDM15	PRAD	1.90055	2.83166	4.33908	1.64224e-08	1.31543e-05
NAIF1	PRAD	1.66417	2.30252	3.23679	6.07485e-08	4.86595e-05
ZNF781	PRAD	1.88053	2.74037	4.09176	7.87853e-09	6.3107e-06
MED13	PRAD	1.94502	2.97534	4.70466	2.29091e-08	1.83502e-05
ZFP82	PRAD	1.51559	2.06233	2.84324	1.15578e-06	0.000925777
ZNF451	PRAD	1.66233	2.3889	3.5048	4.29279e-07	0.000343852
SSRP1	PRAD	2.15981	3.47147	5.83806	6.8171e-09	5.4605e-06
SAFB2	PRAD	1.64692	2.38983	3.54445	7.56805e-07	0.000606201
TSC22D2	PRAD	1.9269	3.05118	5.02684	1.41214e-07	0.000113112
ZNF225	PRAD	1.78305	2.69952	4.20999	2.48841e-07	0.000199322
ZNF782	PRAD	1.76971	2.69919	4.24585	3.94775e-07	0.000316215
ZNF619	PRAD	1.83897	2.744	4.20936	4.9339e-08	3.95205e-05
E2F8	PRAD	1.93682	2.94162	4.61107	2.11894e-08	1.69727e-05
CHD1	PRAD	2.18734	3.75262	6.85114	3.71619e-08	2.97667e-05
IRF5	PRAD	1.83897	2.744	4.20936	4.9339e-08	3.95205e-05
SMAD1	PRAD	1.96169	2.95709	4.59529	9.27974e-09	7.43308e-06
STAT6	PRAD	1.71524	2.55198	3.8974	5.09601e-07	0.00040819
MTF2	PRAD	1.88409	2.67028	3.86238	1.48938e-09	1.193e-06
KLF11	PRAD	1.91847	3.13673	5.3731	3.64557e-07	0.00029201
WIZ	PRAD	1.75571	2.69886	4.28425	6.27288e-07	0.000502458
ZIK1	PRAD	1.71825	2.60595	4.07057	1.02154e-06	0.000818252
ZNF44	PRAD	1.99838	3.1901	5.31178	4.70626e-08	3.76971e-05
IKZF4	PRAD	2.02485	3.11611	4.96548	7.84211e-09	6.28153e-06
FIP1L1	PRAD	1.80306	2.74766	4.31902	2.76769e-07	0.000221692
ZNF34	PRAD	1.68666	2.44491	3.62265	2.84344e-07	0.00022776
PHF5A	PRAD	1.79276	2.67829	4.11291	1.41497e-07	0.000113339
ELF2	PRAD	2.08196	3.64184	6.8085	3.04372e-07	0.000243802
ELK1	PRAD	1.96925	3.29755	5.82365	4.13716e-07	0.000331386
ZBTB42	PRAD	2.02784	3.30617	5.65106	7.66664e-08	6.14098e-05
SIN3B	PRAD	1.99515	3.56381	6.83759	1.05399e-06	0.000844244
ZNF138	PRAD	2.25402	3.7494	6.58671	4.71922e-09	3.78009e-06
DNMT1	PRAD	2.21332	3.79497	6.92566	2.46499e-08	1.97446e-05
ZZZ3	PRAD	1.86512	2.88115	4.60478	1.62008e-07	0.000129768
SATB2	PRAD	2.09991	3.34428	5.55836	9.63408e-09	7.7169e-06
ZNF839	PRAD	2.24661	3.64531	6.20783	2.01567e-09	1.61455e-06
ZNF678	PRAD	2.31828	3.80172	6.56461	1.32387e-09	1.06042e-06
CREB3	PRAD	1.90738	3.02169	4.98024	2.09559e-07	0.000167856
ZNF25	PRAD	2.44528	4.41113	8.62478	9.62955e-09	7.71327e-06
KLF9	PRAD	2.05017	3.8201	7.75768	1.63295e-06	0.00130799
ZHX3	PRAD	2.95982	8.08754	30.8875	2.27351e-07	0.000182108
ZNF775	PRAD	2.56451	4.84445	10.1021	7.8092e-09	6.25517e-06
RARB	PRAD	3.47844	20.8774	847.821	1.94617e-06	0.00155888
ZNF526	PRAD	2.21083	4.10199	8.30214	3.06831e-07	0.000245772
ZNF30	PRAD	3.227	6.20938	13.3836	9.42645e-12	7.55058e-09
ZNF20	PRAD	1.66967	2.5189	3.90759	1.7883e-06	0.00143243
ZBTB8A	PRAD	2.31073	5.1023	13.3086	1.93346e-06	0.0015487
ZNF101	PRAD	2.50865	5.84007	16.6439	6.48558e-07	0.000519495
DMTF1	PRAD	3.08388	6.1469	13.9255	2.17281e-10	1.74042e-07
ZNF687	SARC	1.7024	2.20499	2.88283	1.43422e-10	1.14881e-07
MAX	SARC	1.6093	2.34846	3.50519	1.90384e-06	0.00152497
POLR2G	SARC	1.79723	2.47341	3.45905	1.65294e-09	1.324e-06
ZNF501	SARC	1.84591	3.09693	5.4772	1.65573e-06	0.00132624
LCORL	SARC	1.97781	3.60129	7.09223	2.03963e-06	0.00163374
PHF8	SARC	2.05184	3.52664	6.44798	2.5355e-07	0.000203094
RXRA	SARC	2.63863	6.10832	17.3481	2.07143e-07	0.000165922
TFDP1	SARC	2.49609	4.40285	8.36846	1.5539e-09	1.24467e-06
ZSCAN31	SARC	2.44574	4.92296	11.2308	1.35103e-07	0.000108218
NFKB2	SARC	2.46969	5.41729	14.0721	3.96251e-07	0.000317397
POLR2AphosphoS2	SARC	3.61709	13.8821	118.426	1.20755e-07	9.67246e-05
ZNF687	STAD	1.76575	2.21214	2.79002	1.9533e-13	1.56459e-10
MAX	STAD	1.70594	2.37886	3.37289	3.49751e-08	2.8015e-05
SAP130	STAD	2.12899	2.99882	4.31043	3.08026e-12	2.46729e-09
SOX6	STAD	2.16797	3.21911	4.91957	7.12776e-11	5.70934e-08
GATAD2A	STAD	1.86816	3.02777	5.12595	7.20105e-07	0.000576804
ZFX	STAD	2.14595	3.0871	4.54653	1.48353e-11	1.1883e-08
VEZF1	STAD	2.16366	3.56401	6.17592	1.50089e-08	1.20221e-05
ZNF770	STAD	1.92475	2.8895	4.46522	1.61458e-08	1.29328e-05
ARID4A	STAD	1.72718	2.50564	3.71584	1.84612e-07	0.000147874
ZGPAT	STAD	1.89699	2.76879	4.14015	6.8513e-09	5.48789e-06
TBX2	STAD	1.77849	2.66238	4.09589	1.85179e-07	0.000148328
ASH2L	STAD	1.82664	2.67007	3.99755	2.86502e-08	2.29488e-05
RARA	STAD	2.05884	3.75105	7.39028	1.0975e-06	0.000879094
ZFY	STAD	2.18729	3.41714	5.5498	1.10594e-09	8.85858e-07
ZNF501	STAD	1.71508	2.54121	3.86152	4.16653e-07	0.000333739
RXRB	STAD	2.18769	4.0648	8.24011	2.92195e-07	0.000234048
SOX5	STAD	1.95193	3.42972	6.43349	1.52413e-06	0.00122083
PHF21A	STAD	1.64155	2.4372	3.70917	1.62473e-06	0.00130141
NFIL3	STAD	2.34668	4.74739	10.8669	3.92195e-07	0.000314148
HMGXB4	STAD	1.97306	2.99929	4.70595	1.34156e-08	1.07459e-05
KAT8	STAD	2.27154	3.89436	7.10614	1.57783e-08	1.26385e-05
FOXP4	STAD	1.97342	3.5305	6.78196	1.56718e-06	0.00125531
ZBTB38	STAD	1.72239	2.654	4.22205	1.20174e-06	0.000962596
PHF8	STAD	2.62817	4.24317	7.19625	4.64836e-12	3.72334e-09
ERF	STAD	2.21031	4.01182	7.88203	1.27016e-07	0.000101739
YEATS4	STAD	1.97713	3.10241	5.05615	3.86023e-08	3.09204e-05
IKZF5	STAD	1.86681	3.0975	5.39789	1.2095e-06	0.000968806
IRF2	STAD	2.05935	3.83912	7.80009	1.67412e-06	0.00134097
DMAP1	STAD	2.1975	3.83723	7.16433	5.51448e-08	4.41709e-05
GFI1	STAD	2.68759	5.21982	11.3281	4.34153e-09	3.47756e-06
ZNF362	STAD	1.91246	3.16911	5.51735	5.55536e-07	0.000444985
ZNF792	STAD	2.1747	4.27144	9.34666	1.00701e-06	0.000806612
FOXJ3	STAD	2.78699	6.4505	18.3173	9.76257e-08	7.81982e-05
RFXAP	STAD	2.1747	4.27144	9.34666	1.00701e-06	0.000806612
ZSCAN9	STAD	3.12084	8.50379	32.4069	8.63701e-08	6.91824e-05
KDM5A	STAD	2.12364	3.95191	8.01923	6.92891e-07	0.000555006
ZNF460	STAD	2.99259	6.90316	19.5461	1.33182e-08	1.06678e-05
ZNF766	STAD	3.67097	21.9501	889.847	1.16599e-06	0.000933956
NAIF1	STAD	2.09555	4.00487	8.42237	1.62621e-06	0.00130259
ZNF687	TGCT	1.68637	2.05137	2.50747	2.68921e-14	2.15406e-11
MAX	TGCT	1.60523	2.16294	2.95184	5.83111e-08	4.67072e-05
POLR2G	TGCT	1.46851	1.91828	2.52904	4.26576e-07	0.000341688
RBFOX2	TGCT	1.38867	1.74383	2.20284	6.0093e-07	0.000481345
ZNF770	TGCT	1.98052	2.82517	4.11958	2.55139e-10	2.04366e-07
ARID4A	TGCT	1.61516	2.27584	3.26479	4.74982e-07	0.000380461
ZGPAT	TGCT	1.95219	2.85439	4.28122	2.49169e-09	1.99585e-06
ZFY	TGCT	1.83674	2.67792	4.00055	1.90864e-08	1.52882e-05
ZNF501	TGCT	1.67076	2.35092	3.36863	1.34594e-07	0.00010781
RXRB	TGCT	2.2588	4.0024	7.63324	4.62947e-08	3.7082e-05
PHF21A	TGCT	1.62195	2.36526	3.52816	1.36502e-06	0.00109338
ZBTB38	TGCT	1.68301	2.53558	3.92978	1.49803e-06	0.00119992
ZBTB11	TGCT	2.20354	3.53558	5.93746	2.51081e-09	2.01116e-06
NRL	TGCT	1.93603	3.33776	6.1168	1.20052e-06	0.000961617
ZNF607	TGCT	2.26073	4.18294	8.45004	1.01973e-07	8.16801e-05
KAT7	TGCT	2.67588	5.03797	10.478	1.69012e-09	1.35379e-06
ZNF709	TGCT	2.06557	3.67675	7.03493	5.81153e-07	0.000465504
ZNF883	TGCT	2.63234	4.83461	9.71512	1.22206e-09	9.7887e-07
ZNF460	TGCT	2.8258	6.15565	15.9111	2.2961e-08	1.83918e-05
TSC22D2	TGCT	3.5386	21.1531	857.576	1.40139e-06	0.00112251
CHD1	TGCT	3.25813	8.83605	33.5971	2.35317e-08	1.88489e-05
ZNF138	TGCT	2.69206	7.38122	28.2346	1.29929e-06	0.00104073
PAF1	TGCT	3.74911	11.5675	57.8769	9.04123e-09	7.24202e-06
CTCF	THCA	1.45396	1.67376	1.93105	9.04274e-14	7.24324e-11
ZNF687	THCA	1.78515	1.99932	2.24265	1.04358e-36	8.35905e-34
MAX	THCA	1.78484	2.09773	2.47409	1.03666e-21	8.30368e-19
SAP130	THCA	2.13466	2.53634	3.02726	8.40256e-31	6.73045e-28
ZBTB33	THCA	1.47249	1.76136	2.11523	9.87566e-11	7.9104e-08
POLR2G	THCA	1.91519	2.20358	2.54224	3.9768e-32	3.18541e-29
ATF3	THCA	1.45984	1.8156	2.27189	1.9706e-08	1.57845e-05
RBFOX2	THCA	1.94729	2.19622	2.48188	1.26892e-42	1.01641e-39
ARID5B	THCA	1.90716	2.42712	3.11721	4.40856e-15	3.53126e-12
SOX6	THCA	1.92604	2.32303	2.81628	1.82919e-21	1.46518e-18
NFIC	THCA	1.61157	2.00646	2.51449	4.22336e-11	3.38291e-08
GATAD2A	THCA	1.66653	2.09012	2.64047	1.04856e-11	8.39899e-09
DPF2	THCA	1.37609	1.67428	2.04625	8.04345e-08	6.44281e-05
HDAC1	THCA	1.94117	2.41485	3.02648	9.89323e-18	7.92448e-15
KDM1A	THCA	1.53194	1.86233	2.27502	5.32992e-11	4.26926e-08
ARID4B	THCA	1.89396	2.33118	2.88798	5.89485e-18	4.72178e-15
RNF2	THCA	1.29963	1.56378	1.88862	8.9565e-07	0.000717415
L3MBTL2	THCA	1.81866	2.19476	2.66205	1.7871e-18	1.43147e-15
ZFX	THCA	1.78567	2.13234	2.55746	4.2869e-19	3.43381e-16
CTBP1	THCA	1.86125	2.29988	2.86103	8.58762e-17	6.87868e-14
FOSL2	THCA	1.55844	2.0363	2.68778	2.69603e-08	2.15952e-05
TFAP4	THCA	1.71463	2.19479	2.83482	2.50138e-11	2.0036e-08
VEZF1	THCA	1.43236	1.73094	2.10081	2.92618e-09	2.34387e-06
ATF1	THCA	2.15767	2.57815	3.09607	5.67352e-30	4.54449e-27
SOX13	THCA	1.44489	1.89632	2.51379	1.03694e-06	0.000830587
NR2C2	THCA	1.54224	1.80643	2.12216	1.53714e-14	1.23125e-11
ZNF770	THCA	1.63855	2.00128	2.4575	6.28617e-13	5.03522e-10
ARID4A	THCA	1.993	2.39615	2.89542	7.13129e-24	5.71217e-21
ZGPAT	THCA	1.95957	2.40595	2.97332	1.03496e-19	8.29004e-17
FOXA3	THCA	1.578	2.08884	2.79658	4.05044e-08	3.2444e-05
TBX2	THCA	1.7967	2.19292	2.69168	1.2016e-16	9.62482e-14
EGR1	THCA	1.59206	1.98287	2.48554	9.46495e-11	7.58142e-08
ATF7	THCA	1.71122	2.10253	2.59878	4.42021e-14	3.54059e-11
ASH2L	THCA	2.04621	2.47299	3.0051	2.16017e-24	1.73029e-21
GABPB1	THCA	1.75421	2.12556	2.58889	2.09928e-16	1.68153e-13
RARA	THCA	1.48218	1.96235	2.62668	5.68098e-07	0.000455047
MED1	THCA	1.78526	2.25005	2.85868	1.58596e-13	1.27035e-10
MAZ	THCA	1.40855	1.82538	2.38637	1.90442e-06	0.00152544
ZFY	THCA	2.256	2.77601	3.43993	1.85666e-26	1.48719e-23
MXI1	THCA	1.75267	2.28151	3.00148	4.18956e-11	3.35583e-08
UBTF	THCA	1.69164	2.06761	2.54128	3.92112e-14	3.14082e-11
KDM2A	THCA	1.96861	2.45064	3.07379	3.05204e-18	2.44469e-15
ZNF501	THCA	1.84961	2.2327	2.70895	2.48323e-19	1.98907e-16
POLR2A	THCA	2.18278	2.66505	3.27477	4.06528e-26	3.25629e-23
RXRB	THCA	1.50997	1.97509	2.60948	1.39592e-07	0.000111813
JUN	THCA	1.69497	2.10336	2.62738	6.36981e-13	5.10222e-10
HOXA3	THCA	1.76468	2.23304	2.84906	5.81962e-13	4.66151e-10
SIN3A	THCA	1.40262	1.78729	2.29449	8.68649e-07	0.000695788
SOX5	THCA	1.83167	2.43875	3.29022	3.77161e-11	3.02106e-08
PHF21A	THCA	1.77364	2.18089	2.6982	2.37343e-15	1.90112e-12
THAP11	THCA	2.0596	2.65515	3.4596	1.21372e-16	9.72187e-14
POLR2AphosphoS5	THCA	1.64712	2.11088	2.7293	2.58561e-10	2.07108e-07
BCL6	THCA	1.5871	2.12852	2.89125	6.9258e-08	5.54757e-05
HDAC2	THCA	1.66124	2.19966	2.94702	3.32741e-09	2.66526e-06
LCORL	THCA	1.72881	2.15695	2.71014	3.40106e-13	2.72425e-10
ELF3	THCA	1.81314	2.40957	3.24352	4.575e-11	3.66457e-08
HMGXB4	THCA	2.14443	2.62999	3.24707	2.1023e-24	1.68394e-21
SMARCE1	THCA	1.42481	1.84861	2.42001	1.04036e-06	0.000833325
EP400	THCA	2.12359	2.58054	3.15476	2.15768e-25	1.7283e-22
NR2F6	THCA	1.57317	2.10072	2.83967	7.08696e-08	5.67666e-05
ZNF574	THCA	2.12829	2.67074	3.37979	9.98028e-21	7.9942e-18
KAT8	THCA	1.96748	2.50192	3.21089	3.22032e-16	2.57947e-13
MGA	THCA	1.63303	2.04057	2.56744	2.44539e-11	1.95876e-08
FOXP4	THCA	1.85857	2.44703	3.26117	4.12527e-12	3.30434e-09
MNX1	THCA	1.75206	2.16632	2.69591	2.33858e-14	1.8732e-11
POGZ	THCA	1.8159	2.34542	3.05981	1.53671e-12	1.23091e-09
ZBTB38	THCA	1.67803	2.09741	2.64039	3.91585e-12	3.1366e-09
HNF1B	THCA	2.14433	2.77071	3.6201	6.40923e-18	5.1338e-15
E4F1	THCA	2.3346	2.93419	3.7205	8.81655e-25	7.06206e-22
E2F1	THCA	1.51779	1.86611	2.30701	4.70143e-10	3.76584e-07
ZNF48	THCA	1.95033	2.4984	3.23196	2.91054e-15	2.33135e-12
ZNF121	THCA	1.39337	1.7878	2.31208	1.81266e-06	0.00145194
PHF8	THCA	2.64815	3.29707	4.1404	1.35998e-33	1.08934e-30
SUPT5H	THCA	2.10135	2.58046	3.19012	4.92003e-23	3.94095e-20
TRIM24	THCA	1.46841	1.92264	2.54227	5.30669e-07	0.000425066
TEAD1	THCA	1.51121	2.05637	2.83699	1.03491e-06	0.000828961
RXRA	THCA	1.60098	2.08634	2.74644	5.72215e-09	4.58344e-06
ZBTB40	THCA	1.8334	2.33259	2.99417	9.31994e-14	7.46527e-11
ERF	THCA	1.8592	2.42008	3.18497	1.08527e-12	8.69301e-10
GMEB1	THCA	1.57666	1.98274	2.51128	5.88439e-10	4.7134e-07
YEATS4	THCA	1.96202	2.46692	3.1274	4.36596e-17	3.49713e-14
KLF16	THCA	1.85216	2.41118	3.17357	1.51475e-12	1.21332e-09
ETV5	THCA	1.59176	2.15596	2.96049	1.20264e-07	9.63316e-05
IKZF5	THCA	1.52269	1.95912	2.54248	3.35345e-08	2.68612e-05
CBX3	THCA	1.67069	2.26481	3.11439	1.69192e-08	1.35523e-05
ZNF217	THCA	1.68348	2.20192	2.91148	6.1258e-10	4.90677e-07
ZNF24	THCA	1.82773	2.46342	3.36877	1.27245e-10	1.01923e-07
IRF2	THCA	2.18877	2.9123	3.93123	3.81521e-16	3.05599e-13
ZNF263	THCA	1.70091	2.3306	3.24388	1.50969e-08	1.20926e-05
PITX1	THCA	1.69764	2.21993	2.93457	3.39259e-10	2.71746e-07
HMBOX1	THCA	1.82069	2.39856	3.19822	1.49982e-11	1.20136e-08
ISL2	THCA	1.9502	2.6231	3.58051	2.31915e-12	1.85764e-09
RBPJ	THCA	1.52086	1.95975	2.54764	3.85716e-08	3.08959e-05
KDM5B	THCA	1.87538	2.31703	2.882	4.64518e-17	3.72079e-14
DMAP1	THCA	2.45149	3.14687	4.0849	5.18733e-24	4.15505e-21
THRA	THCA	1.68084	2.3769	3.42727	1.15938e-07	9.28662e-05
ZBTB7B	THCA	1.69405	2.26669	3.07282	3.54458e-09	2.83921e-06
ZBTB11	THCA	2.16737	2.67417	3.32306	5.90252e-24	4.72792e-21
GFI1	THCA	1.64823	2.15345	2.84328	1.75441e-09	1.40529e-06
TAF1	THCA	2.10584	2.70037	3.49853	5.81253e-18	4.65584e-15
ZNF639	THCA	1.64244	2.05415	2.58718	2.15663e-11	1.72746e-08
SPEN	THCA	1.65185	2.12623	2.76222	3.86588e-10	3.09657e-07
HNRNPLL	THCA	1.91495	2.52423	3.36908	6.48312e-13	5.19298e-10
ZNF395	THCA	1.49444	1.84747	2.29702	2.38294e-09	1.90873e-06
ZNF788	THCA	1.69672	2.19945	2.87991	1.74214e-10	1.39545e-07
ZEB2	THCA	2.0466	2.80355	3.90789	1.08685e-12	8.70563e-10
ZNF362	THCA	1.74293	2.25389	2.94389	2.49692e-11	2.00004e-08
ZNF350	THCA	1.75911	2.19374	2.75519	7.75187e-14	6.20925e-11
MIXL1	THCA	2.0587	2.90088	4.17555	1.22691e-11	9.82757e-09
NCOR1	THCA	1.5343	2.09822	2.91121	7.74149e-07	0.000620094
GABPA	THCA	1.43386	1.87896	2.48632	1.49846e-06	0.00120026
RBBP5	THCA	1.97071	2.47465	3.13295	2.02035e-17	1.6183e-14
RFX5	THCA	1.62808	2.36808	3.52441	1.20051e-06	0.000961608
MTA3	THCA	1.59061	2.06277	2.70096	6.64618e-09	5.32359e-06
POLR2H	THCA	2.30093	2.8695	3.6082	2.53773e-25	2.03272e-22
RB1	THCA	1.6709	2.373	3.43813	1.80405e-07	0.000144505
HOMEZ	THCA	2.03481	2.93318	4.33284	1.58885e-10	1.27267e-07
GATAD1	THCA	1.94955	2.59678	3.50625	7.81432e-13	6.25927e-10
HNF1A	THCA	1.52001	1.99503	2.64555	1.42751e-07	0.000114344
TBP	THCA	1.717	2.49157	3.70119	1.68715e-07	0.000135141
DRAP1	THCA	1.57904	2.16319	3.00814	2.75571e-07	0.000220733
ZNF317	THCA	1.47821	1.92174	2.52183	2.29326e-07	0.00018369
MYBL2	THCA	1.74655	2.38367	3.30417	2.71067e-09	2.17125e-06
NFRKB	THCA	1.85345	2.47842	3.36	2.43968e-11	1.95418e-08
ZNF614	THCA	1.84305	2.51808	3.49621	2.22802e-10	1.78464e-07
TFDP1	THCA	1.81712	2.24274	2.7859	5.66802e-16	4.54009e-13
KMT2A	THCA	2.02037	2.71443	3.70171	2.89935e-13	2.32238e-10
CC2D1A	THCA	1.76436	2.43692	3.42374	4.30853e-09	3.45113e-06
ZNF772	THCA	2.07071	2.78722	3.80923	7.77205e-14	6.22541e-11
TFE3	THCA	2.29697	3.33093	4.96211	6.04291e-13	4.84037e-10
KMT2B	THCA	2.20391	2.99405	4.13735	4.09379e-15	3.27913e-12
MTA1	THCA	1.57672	2.06695	2.73812	2.02355e-08	1.62086e-05
ZSCAN31	THCA	2.27927	3.00883	4.02684	3.78498e-18	3.03177e-15
E2F4	THCA	1.77669	2.43056	3.3785	1.5884e-09	1.27231e-06
TOE1	THCA	1.52318	2.02299	2.71782	2.5374e-07	0.000203246
SFPQ	THCA	2.15043	2.84323	3.81076	4.26292e-16	3.4146e-13
SMAD5	THCA	2.72368	3.77634	5.34851	2.8477e-20	2.28101e-17
ZNF792	THCA	2.03581	2.82655	4	6.25661e-12	5.01154e-09
ZNF777	THCA	2.0803	2.74704	3.67563	3.30974e-15	2.65111e-12
POLR2B	THCA	1.78144	2.42275	3.34567	9.10074e-10	7.28969e-07
FOXJ3	THCA	1.67069	2.26481	3.11439	1.69192e-08	1.35523e-05
ZNF580	THCA	1.73896	2.34167	3.19771	1.47187e-09	1.17897e-06
NFKB2	THCA	2.21482	2.926	3.91864	3.43962e-17	2.75514e-14
POLR2AphosphoS2	THCA	1.91459	2.6736	3.80594	2.30736e-10	1.8482e-07
HOXA5	THCA	1.96618	2.6181	3.53427	5.57256e-13	4.46362e-10
RCOR2	THCA	1.69346	2.33504	3.27302	2.64384e-08	2.11772e-05
ZNF800	THCA	2.04242	2.78093	3.85006	6.4319e-13	5.15195e-10
MIER3	THCA	1.82774	2.52959	3.56321	9.29998e-10	7.44928e-07
ZNF280D	THCA	1.68321	2.19387	2.88922	4.71199e-10	3.7743e-07
THAP9	THCA	1.90358	2.43644	3.14838	1.34531e-14	1.07759e-11
YEATS2	THCA	2.14783	2.91168	4.01262	1.65152e-14	1.32286e-11
TGIF2	THCA	1.83509	2.60738	3.78364	5.39856e-09	4.32424e-06
NRL	THCA	2.77233	3.9206	5.68207	2.03807e-19	1.6325e-16
MXD4	THCA	1.60279	2.15393	2.93251	6.015e-08	4.81801e-05
NCOA1	THCA	2.00982	2.84613	4.11902	5.67646e-11	4.54684e-08
ZNF547	THCA	1.92433	2.57641	3.49843	3.6993e-12	2.96314e-09
ZNF556	THCA	1.76176	2.30101	3.0387	3.94268e-11	3.15808e-08
ARNTL	THCA	1.5969	2.19326	3.05898	1.75066e-07	0.000140228
NBN	THCA	1.66205	2.25969	3.11731	1.90856e-08	1.52876e-05
DLX6	THCA	2.18246	3.24536	4.97503	4.91862e-11	3.93982e-08
NONO	THCA	2.04725	2.88533	4.15383	1.75769e-11	1.40791e-08
ZNF607	THCA	2.47011	3.36496	4.66795	2.23163e-18	1.78754e-15
PML	THCA	1.86489	2.49928	3.39681	2.78169e-11	2.22813e-08
RFXAP	THCA	2.44871	3.49122	5.10237	3.48506e-15	2.79153e-12
ZNF691	THCA	1.79423	2.47674	3.47779	2.27998e-09	1.82626e-06
ZNF264	THCA	1.54059	2.16151	3.08595	1.73028e-06	0.00138595
ZNF543	THCA	1.42305	1.8245	2.35807	6.84407e-07	0.00054821
ZNF441	THCA	1.59371	2.22495	3.16022	4.54274e-07	0.000363873
ZBTB25	THCA	1.713	2.36104	3.30825	1.38475e-08	1.10918e-05
BCL3	THCA	1.91135	2.72335	3.96673	1.04742e-09	8.38984e-07
ZNF503	THCA	2.31055	3.40737	5.17702	2.12513e-12	1.70223e-09
ZNF274	THCA	2.0721	2.90753	4.16535	8.16445e-12	6.53973e-09
ZNF891	THCA	2.29896	3.22766	4.63155	2.14109e-14	1.71501e-11
KAT7	THCA	2.3515	3.17066	4.34595	1.33641e-17	1.07046e-14
ZSCAN9	THCA	1.95895	2.78865	4.05871	3.69721e-10	2.96146e-07
ELF4	THCA	2.50763	3.54105	5.11875	2.06754e-16	1.6561e-13
MXD1	THCA	1.53255	2.07331	2.84246	4.4379e-07	0.000355476
SKIL	THCA	2.12158	2.79411	3.72797	5.19956e-16	4.16485e-13
PHF20	THCA	1.75722	2.33744	3.14924	3.09345e-10	2.47785e-07
ZNF205	THCA	2.10995	3.06867	4.58213	6.02446e-11	4.82559e-08
ZNF414	THCA	2.02694	2.69042	3.61981	4.52896e-14	3.6277e-11
KDM3A	THCA	1.93993	2.75059	3.98486	3.34873e-10	2.68233e-07
ZNF709	THCA	2.25151	3.05678	4.22082	9.24153e-16	7.40246e-13
HIVEP1	THCA	1.58407	2.14035	2.9312	1.0485e-07	8.39845e-05
[truncated: 165 more rows]

## Sheet: Table S7
Table S7 Enrichment of eRNAQTLs in the binding site of RNA binding proteins
RNA binding protein	Cacner type	Lower	OR	Upper	Enrichment P-value	Bonferroni P-value
AKAP1	BRCA	2.79354	10.9552	94.3859	1.02e-05	0.00153
BUD13	BRCA	1.98684	3.71398	7.55982	3.47e-06	0.0005205
DROSHA	BRCA	1.78125	2.83522	4.69061	1.19e-06	0.0001785
GRWD1	BRCA	2.17355	3.79809	7.09397	7.65e-08	1.1475e-05
KHSRP	BRCA	1.55857	2.17945	3.09702	1.14e-06	0.000171
SAFB	BRCA	1.90793	3.30135	6.06649	2.02e-06	0.000303
SAFB2	BRCA	1.56246	2.33832	3.58848	9.23e-06	0.0013845
SRSF9	BRCA	2.01198	4.11178	9.47653	7.97e-06	0.0011955
HNRNPL	CESC	2.12426	4.32205	9.93356	2.46e-06	0.000369
EIF3D	CRC	2.29566	5.07465	13.2487	2.03e-06	0.0003045
ILF3	CRC	2.40406	6.04125	19.5173	3.86e-06	0.000579
PRPF4	CRC	3.37666	20.2977	824.934	3.75e-06	0.0005625
HNRNPC	GBM	1.65808	2.4996	3.86801	2.01e-06	0.0003015
HNRNPL	GBM	1.95409	3.58876	7.11204	3.81e-06	0.0005715
MATR3	GBM	4.40719	26.1938	1058.34	7.41e-08	1.1115e-05
SUGP2	GBM	1.72005	2.84499	4.918	7.45e-06	0.0011175
HNRNPA1	HNSC	1.49979	2.11963	3.04826	5.33e-06	0.0007995
LSM11	HNSC	1.9444	3.72394	7.8419	6.56e-06	0.000984
PABPN1	HNSC	2.75629	8.66073	43.7991	2.39e-06	0.0003585
AGGF1	KIRC	1.91743	3.00648	4.89522	9.84e-08	1.476e-05
CSTF2	KIRC	1.78288	2.50128	3.57475	9.65e-09	1.4475e-06
CSTF2T	KIRC	1.61544	2.26716	3.23772	4.02e-07	6.03e-05
DROSHA	KIRC	1.8405	2.66901	3.96262	1.65e-08	2.475e-06
FASTKD2	KIRC	1.88038	2.95098	4.80925	2.11e-07	3.165e-05
FUS	KIRC	2.07462	3.3759	5.76154	3.96e-08	5.94e-06
GRWD1	KIRC	2.28373	3.65902	6.13796	6.61e-10	9.915e-08
HLTF	KIRC	1.71019	2.52805	3.83325	5.08e-07	7.62e-05
HNRNPA1	KIRC	1.92272	2.52347	3.35077	3.7e-13	5.55e-11
HNRNPC	KIRC	2.07157	2.6745	3.48941	1.17e-16	1.755e-14
HNRNPL	KIRC	1.73447	2.37254	3.29517	4.94e-09	7.41e-07
HNRNPU	KIRC	1.58395	2.10065	2.8171	3.94e-08	5.91e-06
HNRNPUL1	KIRC	2.04314	3.51438	6.42855	3.35e-07	5.025e-05
IGF2BP2	KIRC	2.19269	4.29729	9.38264	7.16e-07	0.0001074
ILF3	KIRC	1.90006	2.61425	3.65781	1.32e-10	1.98e-08
KHSRP	KIRC	2.21911	2.95644	3.99514	1.86e-16	2.79e-14
LARP4	KIRC	1.82911	2.96138	5.00873	1.19e-06	0.0001785
LSM11	KIRC	1.68649	2.57612	4.05729	1.74e-06	0.000261
MATR3	KIRC	2.62467	5.09409	11.0489	7.86e-09	1.179e-06
NKRF	KIRC	1.50139	2.14721	3.12927	7.96e-06	0.001194
NONO	KIRC	1.67116	2.57313	4.08979	2.75e-06	0.0004125
PPIL4	KIRC	2.18438	3.58893	6.20497	7.99e-09	1.1985e-06
PRPF8	KIRC	2.28373	3.65902	6.13796	6.61e-10	9.915e-08
PUS1	KIRC	2.31046	5.81291	18.79	6.38e-06	0.000957
QKI	KIRC	1.89102	3.05641	5.16264	3.77e-07	5.655e-05
SAFB	KIRC	2.30397	3.82563	6.71159	2.28e-09	3.42e-07
SAFB2	KIRC	2.33765	3.37665	5.00557	2.38e-13	3.57e-11
SFPQ	KIRC	1.65784	2.61827	4.28816	7.72e-06	0.001158
SRSF9	KIRC	1.9922	3.4313	6.28257	4.86e-07	7.29e-05
STAU2	KIRC	1.53189	2.1711	3.13295	3.3e-06	0.000495
SUGP2	KIRC	1.59949	2.22239	3.13811	3.64e-07	5.46e-05
TAF15	KIRC	1.87207	2.65233	3.83539	1.7e-09	2.55e-07
TIA1	KIRC	1.80779	2.59844	3.81809	1.86e-08	2.79e-06
UCHL5	KIRC	1.89219	2.85471	4.43986	3.16e-08	4.74e-06
UPF1	KIRC	2.05619	4.18557	9.61864	6.08e-06	0.000912
XRCC6	KIRC	2.22916	3.88197	7.23241	4.21e-08	6.315e-06
XRN2	KIRC	1.5868	2.21297	3.13745	5.66e-07	8.49e-05
ZC3H11A	KIRC	1.87059	2.96375	4.88456	3.3e-07	4.95e-05
ZNF622	KIRC	1.9721	3.34647	6.01059	4.68e-07	7.02e-05
AGGF1	KIRP	1.88345	3.02034	5.04725	4.02e-07	6.03e-05
CSTF2	KIRP	1.5207	2.17876	3.18042	6.53e-06	0.0009795
DROSHA	KIRP	2.12011	3.23588	5.10733	1.3e-09	1.95e-07
EIF3D	KIRP	1.69506	2.6146	4.16159	2.2e-06	0.00033
EXOSC5	KIRP	2.41681	5.331	13.8971	6.71e-07	0.00010065
FASTKD2	KIRP	1.79048	3.11097	5.73398	9.48e-06	0.001422
GRWD1	KIRP	1.71888	2.7995	4.75746	6.01e-06	0.0009015
HLTF	KIRP	1.79205	2.82612	4.62307	1.05e-06	0.0001575
HNRNPA1	KIRP	2.12588	2.86197	3.90999	2.18e-14	3.27e-12
HNRNPC	KIRP	2.07663	2.74606	3.67717	6.87e-15	1.0305e-12
HNRNPL	KIRP	1.68339	2.40078	3.49089	2.01e-07	3.015e-05
HNRNPU	KIRP	1.6115	2.23595	3.15101	2.41e-07	3.615e-05
ILF3	KIRP	2.18309	3.13626	4.61295	4.34e-12	6.51e-10
KHSRP	KIRP	2.17464	2.98405	4.16603	5.78e-14	8.67e-12
LARP4	KIRP	2.00322	3.74433	7.62153	2.22e-06	0.000333
MATR3	KIRP	3.04062	6.62009	17.103	3.2e-09	4.8e-07
NONO	KIRP	2.2275	4.04425	7.9468	1.09e-07	1.635e-05
PUS1	KIRP	3.56478	21.3987	868.959	1.69e-06	0.0002535
SAFB	KIRP	1.84921	3.11247	5.5177	1.74e-06	0.000261
SUGP2	KIRP	1.84519	2.61067	3.76612	3.04e-09	4.56e-07
TAF15	KIRP	1.80796	2.70423	4.15723	1.19e-07	1.785e-05
TIA1	KIRP	1.83601	2.91901	4.82516	5.39e-07	8.085e-05
XRN2	KIRP	1.77772	2.67815	4.14972	2.7e-07	4.05e-05
ZC3H11A	KIRP	1.88345	3.02034	5.04725	4.02e-07	6.03e-05
ZNF622	KIRP	2.31348	4.40116	9.22434	1.56e-07	2.34e-05
AGGF1	LGG	1.56934	2.14208	2.96495	2.94e-07	4.41e-05
AKAP8L	LGG	1.80415	2.54872	3.67191	8.82e-09	1.323e-06
AQR	LGG	1.89406	2.66028	3.80971	7.13e-10	1.0695e-07
BCCIP	LGG	1.53049	2.2263	3.30858	7.61e-06	0.0011415
BUD13	LGG	1.53514	2.06002	2.79793	3.52e-07	5.28e-05
CDC40	LGG	1.47294	1.93861	2.57705	5.62e-07	8.43e-05
CPSF6	LGG	1.66904	2.68638	4.50199	9.47e-06	0.0014205
CSTF2	LGG	2.01061	2.57642	3.33348	3.1e-16	4.65e-14
DROSHA	LGG	1.72156	2.23372	2.92703	8.85e-11	1.3275e-08
EIF3D	LGG	1.53476	1.99569	2.61932	4.57e-08	6.855e-06
EXOSC5	LGG	2.54686	4.01975	6.6335	4.5e-12	6.75e-10
FUS	LGG	1.72364	2.28293	3.05963	5.17e-10	7.755e-08
GRWD1	LGG	1.62368	2.16432	2.91969	1.92e-08	2.88e-06
HLTF	LGG	1.6009	2.1304	2.86813	3.01e-08	4.515e-06
HNRNPA1	LGG	1.80992	2.17422	2.62397	6.89e-19	1.0335e-16
HNRNPC	LGG	1.82359	2.17363	2.60185	2.3e-20	3.45e-18
HNRNPL	LGG	1.51576	1.87848	2.3415	1.41e-09	2.115e-07
HNRNPM	LGG	1.49962	2.13547	3.09712	6.96e-06	0.001044
HNRNPU	LGG	1.76681	2.17112	2.68364	3.55e-15	5.325e-13
HNRNPUL1	LGG	1.45234	2.00647	2.81228	8.04e-06	0.001206
IGF2BP3	LGG	1.67787	2.33392	3.3016	6.56e-08	9.84e-06
ILF3	LGG	2.28982	2.92878	3.78496	2.06e-21	3.09e-19
KHSRP	LGG	2.29574	2.82321	3.49611	1.62e-27	2.43e-25
LARP4	LGG	1.75014	2.61488	4.01581	3.16e-07	4.74e-05
LSM11	LGG	1.86183	2.58818	3.6625	7.32e-10	1.098e-07
MATR3	LGG	1.98267	3.0275	4.78024	1.22e-08	1.83e-06
METAP2	LGG	1.79671	3.11227	5.72448	7.68e-06	0.001152
MTPAP	LGG	1.47499	2.01838	2.80005	2.97e-06	0.0004455
NKRF	LGG	1.62663	2.10748	2.75631	1.77e-09	2.655e-07
NONO	LGG	1.62868	2.18063	2.95597	1.88e-08	2.82e-06
PABPN1	LGG	1.73707	2.96821	5.36009	1.03e-05	0.001545
PPIL4	LGG	1.82512	2.52191	3.54414	1.15e-09	1.725e-07
PRPF8	LGG	1.93211	2.62436	3.61999	1.59e-11	2.385e-09
QKI	LGG	1.52216	2.1411	3.06379	3.41e-06	0.0005115
RBFOX2	LGG	1.85427	2.39639	3.12848	5.15e-13	7.725e-11
RBM15	LGG	1.50118	2.04154	2.81337	1.26e-06	0.000189
RBM22	LGG	1.74974	2.3918	3.31991	3.7e-09	5.55e-07
SAFB	LGG	2.2341	3.06588	4.28342	8.57e-15	1.2855e-12
SAFB2	LGG	1.90348	2.40625	3.06742	1.73e-15	2.595e-13
SND1	LGG	1.46057	2.05094	2.92724	9.51e-06	0.0014265
SRSF1	LGG	1.48537	2.00541	2.7413	1.43e-06	0.0002145
SRSF9	LGG	1.58613	2.23536	3.20689	8.59e-07	0.00012885
STAU2	LGG	1.8878	2.47767	3.29004	1.09e-12	1.635e-10
SUGP2	LGG	1.92251	2.43281	3.10481	1.01e-15	1.515e-13
TAF15	LGG	1.43981	1.82452	2.32801	1.58e-07	2.37e-05
TIA1	LGG	2.3897	3.17558	4.28151	3.41e-19	5.115e-17
U2AF1	LGG	1.71508	2.27684	3.05905	8.06e-10	1.209e-07
U2AF2	LGG	1.57281	2.11871	2.89066	1.46e-07	2.19e-05
UCHL5	LGG	1.73117	2.30246	3.10008	6.64e-10	9.96e-08
UPF1	LGG	1.91611	3.20996	5.6698	6.61e-07	9.915e-05
XRCC6	LGG	1.74186	2.5443	3.80666	1.44e-07	2.16e-05
XRN2	LGG	1.6594	2.12	2.7312	1.59e-10	2.385e-08
YBX3	LGG	1.7003	2.47351	3.68189	2.53e-07	3.795e-05
YWHAG	LGG	2.72553	5.46056	12.4127	6.63e-09	9.945e-07
ZC3H11A	LGG	1.54076	2.07216	2.82143	3.02e-07	4.53e-05
ZNF622	LGG	1.85242	2.65929	3.90278	6.68e-09	1.002e-06
HLTF	LIHC	2.13944	4.17648	8.9184	1.74e-06	0.000261
HNRNPA1	LIHC	1.96706	3.20513	5.42523	3.16e-07	4.74e-05
HNRNPC	LIHC	1.94568	2.98872	4.71603	4.08e-08	6.12e-06
HNRNPL	LIHC	1.77906	2.95026	5.08553	4.36e-06	0.000654
KHSRP	LIHC	1.6614	2.63655	4.30658	1.02e-05	0.00153
TAF15	LIHC	2.00779	3.47965	6.3532	7.75e-07	0.00011625
BUD13	LUAD	1.91989	3.6772	7.74331	7.07e-06	0.0010605
CSTF2T	LUAD	1.68946	2.5976	4.12435	2.14e-06	0.000321
DROSHA	LUAD	2.05939	3.53748	6.46419	2.54e-07	3.81e-05
GRWD1	LUAD	2.33938	4.56298	9.932	1.41e-07	2.115e-05
HLTF	LUAD	2.20185	3.90504	7.45142	7.19e-08	1.0785e-05
HNRNPA1	LUAD	1.59613	2.21716	3.13021	3.97e-07	5.955e-05
ILF3	LUAD	1.78399	2.78025	4.4901	6.42e-07	9.63e-05
KHSRP	LUAD	1.8116	2.65493	3.99	4.53e-08	6.795e-06
LSM11	LUAD	2.0944	4.11019	8.98442	1.92e-06	0.000288
MTPAP	LUAD	2.33902	5.4547	15.5679	3.46e-06	0.000519
NONO	LUAD	2.07145	4.20861	9.66443	4.34e-06	0.000651
PPIG	LUAD	2.19155	5.13255	14.6872	8.28e-06	0.001242
PPIL4	LUAD	2.12872	4.49328	10.925	4.1e-06	0.000615
RBM22	LUAD	2.03994	3.70749	7.29051	8.7e-07	0.0001305
SAFB2	LUAD	1.88336	3.11413	5.41179	7.1e-07	0.0001065
SRSF1	LUAD	1.83735	3.35907	6.63547	9.91e-06	0.0014865
SRSF9	LUAD	1.89085	3.5318	7.18516	6.9e-06	0.001035
SSB	LUAD	2.64845	8.33763	42.1915	4.22e-06	0.000633
UCHL5	LUAD	2.37809	4.50075	9.39971	6.24e-08	9.36e-06
XRN2	LUAD	1.65877	2.57286	4.12583	4.8e-06	0.00072
ZC3H11A	LUAD	2.03994	3.70749	7.29051	8.7e-07	0.0001305
ZNF622	LUAD	2.83158	6.53249	18.4987	4.57e-08	6.855e-06
GRWD1	OV	3.21941	19.3953	789.122	6.86e-06	0.001029
AGGF1	PAAD	2.19763	3.98338	7.7265	2.53e-07	3.795e-05
AQR	PAAD	2.02296	4.08349	9.10807	7.92e-06	0.001188
CSTF2	PAAD	1.85208	2.93974	4.81845	5.56e-07	8.34e-05
DDX55	PAAD	2.37282	6.12092	20.0946	1.02e-05	0.00153
HLTF	PAAD	1.9312	3.11452	5.20739	3.06e-07	4.59e-05
HNRNPA1	PAAD	2.14609	3.0117	4.29622	3.94e-12	5.91e-10
HNRNPC	PAAD	1.9846	2.78454	3.96891	1.22e-10	1.83e-08
HNRNPU	PAAD	1.67388	2.48251	3.75524	1.14e-06	0.000171
IGF2BP2	PAAD	2.37282	6.12092	20.0946	1.02e-05	0.00153
ILF3	PAAD	1.81218	2.64917	3.94809	6.25e-08	9.375e-06
KHDRBS1	PAAD	2.09096	3.60973	6.57156	2.26e-07	3.39e-05
KHSRP	PAAD	1.62623	2.33956	3.41913	1.04e-06	0.000156
PRPF8	PAAD	3.37917	7.09403	17.1737	2.01e-10	3.015e-08
RBFOX2	PAAD	1.70777	2.7497	4.57391	6.8e-06	0.00102
SRSF1	PAAD	1.96991	3.53005	6.72044	2.37e-06	0.0003555
TAF15	PAAD	2.02131	3.13942	5.02599	2.46e-08	3.69e-06
XRN2	PAAD	1.63396	2.53291	4.02714	1.02e-05	0.00153
YBX3	PAAD	2.66995	5.6897	13.9155	7.77e-08	1.1655e-05
ZNF622	PAAD	2.78817	5.92345	14.4602	2.72e-08	4.08e-06
HNRNPC	PCPG	1.82452	2.63752	3.89949	1.81e-08	2.715e-06
HNRNPU	PCPG	1.79631	2.7391	4.30811	2.75e-07	4.125e-05
ILF3	PCPG	2.0011	3.26578	5.58653	1.17e-07	1.755e-05
KHSRP	PCPG	1.99359	2.98496	4.60253	4.07e-09	6.105e-07
MATR3	PCPG	2.7211	7.47152	28.5927	1.1e-06	0.000165
PRPF8	PCPG	1.95038	3.85337	8.46447	9.1e-06	0.001365
RBFOX2	PCPG	2.38284	4.30458	8.42804	1.52e-08	2.28e-06
SUGP2	PCPG	2.0011	3.26578	5.58653	1.17e-07	1.755e-05
AGGF1	PRAD	2.65543	4.5907	8.50523	1.29e-10	1.935e-08
BCLAF1	PRAD	1.98587	3.70739	7.53916	2.51e-06	0.0003765
CDC40	PRAD	1.53098	2.18919	3.19025	4.06e-06	0.000609
CSTF2	PRAD	1.60394	2.18948	3.03103	1.45e-07	2.175e-05
CSTF2T	PRAD	1.46006	2.02496	2.84991	8.69e-06	0.0013035
EIF3H	PRAD	2.33332	4.71883	10.7978	3.8e-07	5.7e-05
FASTKD2	PRAD	1.62098	2.46563	3.86016	5.59e-06	0.0008385
GRWD1	PRAD	2.12854	3.29533	5.29389	1.74e-09	2.61e-07
HLTF	PRAD	1.58627	2.28437	3.35707	2.12e-06	0.000318
HNRNPA1	PRAD	1.45009	1.82623	2.31486	7.22e-08	1.083e-05
HNRNPC	PRAD	1.34824	1.67415	2.08958	1.27e-06	0.0001905
HNRNPU	PRAD	1.6391	2.17218	2.91115	8.12e-09	1.218e-06
ILF3	PRAD	1.51268	2.03781	2.77864	6.37e-07	9.555e-05
KHDRBS1	PRAD	1.78996	2.65808	4.05326	1.28e-07	1.92e-05
KHSRP	PRAD	1.97135	2.61287	3.50748	2.77e-13	4.155e-11
LARP4	PRAD	1.97956	3.41398	6.25861	6.59e-07	9.885e-05
PRPF8	PRAD	1.6702	2.59426	4.16546	4e-06	0.0006
QKI	PRAD	1.69231	2.69755	4.46772	5.56e-06	0.000834
SRSF1	PRAD	1.8417	2.8245	4.47529	1.46e-07	2.19e-05
TAF15	PRAD	1.50775	2.0266	2.75651	7.3e-07	0.0001095
U2AF1	PRAD	1.51445	2.20633	3.28316	9.62e-06	0.001443
UCHL5	PRAD	1.79586	2.69985	4.17624	1.57e-07	2.355e-05
XRN2	PRAD	1.55867	2.21779	3.2146	1.92e-06	0.000288
ZNF622	PRAD	2.23937	3.83732	7.00041	2.55e-08	3.825e-06
DROSHA	SARC	2.09175	4.41937	10.7522	6.73e-06	0.0010095
HNRNPA1	SARC	1.93207	3.28016	5.89474	8.01e-07	0.00012015
PRPF8	SARC	2.41928	6.05572	19.5162	2.9e-06	0.000435
HNRNPA1	STAD	2.21941	3.80914	6.95794	2.39e-08	3.585e-06
HNRNPC	STAD	1.69209	2.67542	4.38691	4.86e-06	0.000729
HLTF	TGCT	2.02453	3.98267	8.72229	4.44e-06	0.000666
KHDRBS1	TGCT	2.02453	3.98267	8.72229	4.44e-06	0.000666
AGGF1	THCA	1.61665	2.377	3.58152	2.11e-06	0.0003165
AQR	THCA	1.70582	2.5461	3.90682	5.73e-07	8.595e-05
BCCIP	THCA	1.80364	3.11489	5.71602	6.45e-06	0.0009675
BUD13	THCA	1.89407	2.91464	4.64474	7.92e-08	1.188e-05
CDC40	THCA	1.55606	2.22597	3.24881	2.5e-06	0.000375
CSTF2	THCA	1.52696	2.01945	2.70051	1.93e-07	2.895e-05
DROSHA	THCA	1.47952	2.0262	2.81482	3.21e-06	0.0004815
FUS	THCA	1.54577	2.20252	3.20008	2.97e-06	0.0004455
G3BP1	THCA	2.42083	6.0519	19.4867	2.98e-06	0.000447
GRWD1	THCA	1.62808	2.36808	3.52441	1.2e-06	0.00018
HLTF	THCA	1.60338	2.25412	3.2272	4.38e-07	6.57e-05
HNRNPA1	THCA	1.60791	2.00998	2.52999	7.38e-11	1.107e-08
HNRNPC	THCA	1.56717	1.93995	2.41601	1.32e-10	1.98e-08
HNRNPL	THCA	1.3543	1.74189	2.25821	6.87e-06	0.0010305
HNRNPU	THCA	1.65027	2.13751	2.79597	6.71e-10	1.0065e-07
HNRNPUL1	THCA	1.62436	2.47961	3.90276	4.32e-06	0.000648
ILF3	THCA	1.49615	1.9576	2.58697	2.41e-07	3.615e-05
KHSRP	THCA	2.21669	2.83897	3.67431	6.07e-20	9.105e-18
LARP4	THCA	1.69296	2.68889	4.44066	5.28e-06	0.000792
LSM11	THCA	1.87419	2.8421	4.44926	4.68e-08	7.02e-06
NCBP2	THCA	1.61849	2.4069	3.6746	2.67e-06	0.0004005
NKRF	THCA	1.49113	2.03567	2.81837	2.1e-06	0.000315
PABPN1	THCA	2.14646	4.34491	9.94855	2e-06	0.0003
PRPF8	THCA	2.13242	3.35064	5.48678	3.04e-09	4.56e-07
QKI	THCA	1.72021	2.56658	3.93723	4.12e-07	6.18e-05
RBFOX2	THCA	1.65326	2.25439	3.12025	2.94e-08	4.41e-06
SAFB	THCA	1.88451	2.78386	4.22643	1.66e-08	2.49e-06
SAFB2	THCA	1.6612	2.22957	3.03221	9.9e-09	1.485e-06
SRSF1	THCA	1.68	2.52539	3.90622	1.25e-06	0.0001875
SRSF9	THCA	1.70679	2.61857	4.1499	1.77e-06	0.0002655
TAF15	THCA	1.5881	2.12484	2.87869	6.05e-08	9.075e-06
TIA1	THCA	1.71598	2.38053	3.35995	1.77e-08	2.655e-06
ZC3H11A	THCA	1.51763	2.19305	3.2367	8.13e-06	0.0012195
ZNF622	THCA	1.72287	2.64205	4.1854	1.24e-06	0.000186
CSTF2	THYM	1.82023	2.92051	4.84529	1.35e-06	0.0002025
HNRNPA1	THYM	2.11981	3.15696	4.81809	4.33e-10	6.495e-08
HNRNPL	THYM	1.80436	2.92467	4.90895	2.3e-06	0.000345
HNRNPU	THYM	1.82791	2.77783	4.3266	2.38e-07	3.57e-05
KHDRBS1	THYM	1.94082	3.32043	5.96215	1.16e-06	0.000174
KHSRP	THYM	2.4848	3.79232	5.9695	3.23e-12	4.845e-10
MTPAP	THYM	2.20833	4.77676	11.8073	4.52e-06	0.000678
PRPF8	THYM	2.23408	4.47732	9.93575	1.11e-06	0.0001665
RBFOX2	THYM	2.26095	4.27855	8.78795	4.13e-07	6.195e-05
SAFB2	THYM	1.82837	3.02432	5.20281	3.01e-06	0.0004515
TAF15	THYM	2.73728	4.80655	9.01162	1.72e-10	2.58e-08
TIA1	THYM	3.1571	5.8533	11.8446	1.57e-11	2.355e-09
ZNF622	THYM	2.54427	6.0585	17.5208	1.33e-06	0.0001995
HNRNPL	UVM	2.53822	8.01367	40.6308	7.83e-06	0.0011745

## Sheet: Table S8
Table S8 Expression patterns of eRNAs in 30 cancers from TCGA
eRNA id	Group	Number of cancer type	Cancer type
ENSR00000035846	Cancer type specific	1	ACC
ENSR00000167989	Cancer type specific	1	ACC
ENSR00000111954	Cancer type specific	1	ACC
ENSR00000191301	Cancer type specific	1	ACC
ENSR00000227958	Cancer type specific	1	BLCA
ENSR00000332564	Cancer type specific	1	BLCA
ENSR00000227959	Cancer type specific	1	BLCA
ENSR00000197645	Cancer type specific	1	BLCA
ENSR00000197646	Cancer type specific	1	BLCA
10:3940610-3946610	Cancer type specific	1	BLCA
ENSR00000208867	Cancer type specific	1	BLCA
ENSR00000148646	Cancer type specific	1	BLCA
ENSR00000148645	Cancer type specific	1	BLCA
ENSR00000049322	Cancer type specific	1	BLCA
ENSR00000285897	Cancer type specific	1	BLCA
ENSR00000049323	Cancer type specific	1	BLCA
ENSR00000102816	Cancer type specific	1	BLCA
ENSR00000051395	Cancer type specific	1	BLCA
ENSR00000197649	Cancer type specific	1	BLCA
11:121280143-121286143	Cancer type specific	1	BLCA
ENSR00000023561	Cancer type specific	1	BLCA
ENSR00000023560	Cancer type specific	1	BLCA
12:114698199-114704199	Cancer type specific	1	BLCA
ENSR00000303848	Cancer type specific	1	BLCA
ENSR00000197650	Cancer type specific	1	BLCA
ENSR00000293597	Cancer type specific	1	BRCA
ENSR00000293598	Cancer type specific	1	BRCA
ENSR00000258981	Cancer type specific	1	BRCA
ENSR00000293599	Cancer type specific	1	BRCA
ENSR00000293592	Cancer type specific	1	BRCA
ENSR00000258012	Cancer type specific	1	BRCA
ENSR00000258113	Cancer type specific	1	BRCA
ENSR00000293591	Cancer type specific	1	BRCA
ENSR00000123176	Cancer type specific	1	BRCA
ENSR00000159954	Cancer type specific	1	BRCA
ENSR00000159955	Cancer type specific	1	BRCA
ENSR00000281394	Cancer type specific	1	BRCA
ENSR00000337840	Cancer type specific	1	BRCA
ENSR00000330509	Cancer type specific	1	BRCA
10:8886414-8892414	Cancer type specific	1	BRCA
ENSR00000330508	Cancer type specific	1	BRCA
11:69528322-69534322	Cancer type specific	1	BRCA
ENSR00000228962	Cancer type specific	1	BRCA
10:5490874-5496874	Cancer type specific	1	BRCA
10:43547939-43553939	Cancer type specific	1	BRCA
ENSR00000159956	Cancer type specific	1	BRCA
ENSR00000191397	Cancer type specific	1	BRCA
8:121142126-121148126	Cancer type specific	1	BRCA
ENSR00000318825	Cancer type specific	1	BRCA
ENSR00000129762	Cancer type specific	1	BRCA
ENSR00000295885	Cancer type specific	1	BRCA
10:8864278-8870278	Cancer type specific	1	BRCA
ENSR00000023840	Cancer type specific	1	BRCA
ENSR00000223858	Cancer type specific	1	BRCA
ENSR00000115545	Cancer type specific	1	BRCA
ENSR00000318824	Cancer type specific	1	BRCA
17:41533216-41539216	Cancer type specific	1	BRCA
14:43647860-43653860	Cancer type specific	1	BRCA
3:189390778-189396778	Cancer type specific	1	CESC
ENSR00000163654	Cancer type specific	1	CESC
ENSR00000272481	Cancer type specific	1	CESC
ENSR00000195085	Cancer type specific	1	CESC
ENSR00000019373	Cancer type specific	1	CESC
ENSR00000019374	Cancer type specific	1	CESC
ENSR00000284719	Cancer type specific	1	CESC
ENSR00000099472	Cancer type specific	1	CESC
ENSR00000099471	Cancer type specific	1	CESC
9:5443093-5449093	Cancer type specific	1	CESC
ENSR00000063633	Cancer type specific	1	CESC
ENSR00000326801	Cancer type specific	1	CESC
ENSR00000306432	Cancer type specific	1	CESC
ENSR00000099470	Cancer type specific	1	CESC
ENSR00000063652	Cancer type specific	1	CESC
11:13020899-13026899	Cancer type specific	1	CESC
ENSR00000063651	Cancer type specific	1	CESC
ENSR00000063641	Cancer type specific	1	CESC
ENSR00000329321	Cancer type specific	1	CESC
ENSR00000041438	Cancer type specific	1	CESC
ENSR00000093940	Cancer type specific	1	CESC
8:37581334-37587334	Cancer type specific	1	CRC
ENSR00000318663	Cancer type specific	1	CRC
ENSR00000035911	Cancer type specific	1	CRC
ENSR00000251157	Cancer type specific	1	CRC
ENSR00000004594	Cancer type specific	1	CRC
8:127244414-127250414	Cancer type specific	1	CRC
8:127243253-127249253	Cancer type specific	1	CRC
ENSR00000059269	Cancer type specific	1	CRC
ENSR00000326010	Cancer type specific	1	DLBC
ENSR00000211929	Cancer type specific	1	DLBC
7:45255701-45261701	Cancer type specific	1	DLBC
ENSR00000089630	Cancer type specific	1	DLBC
ENSR00000212582	Cancer type specific	1	DLBC
ENSR00000326266	Cancer type specific	1	GBM
ENSR00000212583	Cancer type specific	1	GBM
ENSR00000212714	Cancer type specific	1	GBM
ENSR00000207405	Cancer type specific	1	GBM
ENSR00000326265	Cancer type specific	1	GBM
ENSR00000207428	Cancer type specific	1	GBM
ENSR00000326291	Cancer type specific	1	GBM
ENSR00000058482	Cancer type specific	1	GBM
ENSR00000263588	Cancer type specific	1	GBM
ENSR00000212609	Cancer type specific	1	GBM
ENSR00000168687	Cancer type specific	1	GBM
ENSR00000212610	Cancer type specific	1	GBM
ENSR00000265410	Cancer type specific	1	HNSC
ENSR00000043419	Cancer type specific	1	HNSC
ENSR00000054112	Cancer type specific	1	HNSC
ENSR00000292368	Cancer type specific	1	HNSC
ENSR00000335975	Cancer type specific	1	HNSC
ENSR00000186920	Cancer type specific	1	HNSC
ENSR00000327504	Cancer type specific	1	HNSC
ENSR00000262894	Cancer type specific	1	HNSC
ENSR00000317258	Cancer type specific	1	HNSC
ENSR00000100911	Cancer type specific	1	HNSC
ENSR00000100912	Cancer type specific	1	HNSC
ENSR00000285162	Cancer type specific	1	HNSC
ENSR00000307761	Cancer type specific	1	HNSC
ENSR00000047008	Cancer type specific	1	HNSC
ENSR00000291002	Cancer type specific	1	HNSC
ENSR00000117372	Cancer type specific	1	HNSC
11:129635395-129641395	Cancer type specific	1	HNSC
ENSR00000291003	Cancer type specific	1	HNSC
ENSR00000271394	Cancer type specific	1	HNSC
ENSR00000144769	Cancer type specific	1	HNSC
ENSR00000060527	Cancer type specific	1	HNSC
ENSR00000186919	Cancer type specific	1	HNSC
ENSR00000230879	Cancer type specific	1	HNSC
ENSR00000047007	Cancer type specific	1	HNSC
ENSR00000198761	Cancer type specific	1	KICH
ENSR00000256289	Cancer type specific	1	KICH
ENSR00000198764	Cancer type specific	1	KICH
ENSR00000234079	Cancer type specific	1	KICH
ENSR00000212463	Cancer type specific	1	KICH
ENSR00000237730	Cancer type specific	1	KICH
ENSR00000232038	Cancer type specific	1	KICH
ENSR00000198760	Cancer type specific	1	KICH
ENSR00000302793	Cancer type specific	1	KICH
ENSR00000232039	Cancer type specific	1	KICH
ENSR00000148897	Cancer type specific	1	KICH
ENSR00000183348	Cancer type specific	1	KICH
ENSR00000315902	Cancer type specific	1	KICH
ENSR00000122716	Cancer type specific	1	KIRC
ENSR00000290411	Cancer type specific	1	KIRC
ENSR00000252119	Cancer type specific	1	KIRC
ENSR00000142433	Cancer type specific	1	KIRC
ENSR00000089202	Cancer type specific	1	KIRC
ENSR00000074097	Cancer type specific	1	KIRC
ENSR00000067490	Cancer type specific	1	KIRC
ENSR00000024870	Cancer type specific	1	KIRC
ENSR00000018796	Cancer type specific	1	KIRC
ENSR00000215015	Cancer type specific	1	KIRC
ENSR00000197244	Cancer type specific	1	KIRC
ENSR00000287205	Cancer type specific	1	KIRC
ENSR00000024873	Cancer type specific	1	KIRC
ENSR00000258295	Cancer type specific	1	KIRC
ENSR00000116057	Cancer type specific	1	KIRC
ENSR00000281252	Cancer type specific	1	KIRC
ENSR00000087036	Cancer type specific	1	KIRC
ENSR00000320687	Cancer type specific	1	KIRC
ENSR00000106541	Cancer type specific	1	KIRC
ENSR00000136084	Cancer type specific	1	KIRC
ENSR00000185673	Cancer type specific	1	KIRC
18:65278909-65284909	Cancer type specific	1	KIRC
ENSR00000015698	Cancer type specific	1	KIRC
ENSR00000212023	Cancer type specific	1	KIRC
ENSR00000136085	Cancer type specific	1	KIRC
ENSR00000298164	Cancer type specific	1	KIRC
ENSR00000067489	Cancer type specific	1	KIRC
ENSR00000313470	Cancer type specific	1	KIRC
ENSR00000009653	Cancer type specific	1	KIRC
ENSR00000015697	Cancer type specific	1	KIRC
ENSR00000314430	Cancer type specific	1	KIRC
ENSR00000318255	Cancer type specific	1	KIRC
ENSR00000024871	Cancer type specific	1	KIRC
ENSR00000078298	Cancer type specific	1	KIRC
ENSR00000189929	Cancer type specific	1	KIRC
ENSR00000212022	Cancer type specific	1	KIRC
ENSR00000212021	Cancer type specific	1	KIRC
ENSR00000162410	Cancer type specific	1	KIRC
ENSR00000136086	Cancer type specific	1	KIRC
ENSR00000322566	Cancer type specific	1	KIRC
ENSR00000251679	Cancer type specific	1	KIRC
ENSR00000234709	Cancer type specific	1	KIRC
1:90282992-90288992	Cancer type specific	1	KIRC
ENSR00000293327	Cancer type specific	1	KIRC
ENSR00000162411	Cancer type specific	1	KIRC
ENSR00000183954	Cancer type specific	1	KIRC
ENSR00000089200	Cancer type specific	1	KIRC
ENSR00000234708	Cancer type specific	1	KIRC
ENSR00000002188	Cancer type specific	1	KIRC
ENSR00000319091	Cancer type specific	1	KIRC
ENSR00000183953	Cancer type specific	1	KIRC
ENSR00000258632	Cancer type specific	1	KIRC
ENSR00000313468	Cancer type specific	1	KIRC
ENSR00000191878	Cancer type specific	1	KIRC
ENSR00000201359	Cancer type specific	1	KIRC
ENSR00000234710	Cancer type specific	1	KIRC
ENSR00000182347	Cancer type specific	1	KIRC
ENSR00000023605	Cancer type specific	1	KIRP
ENSR00000093717	Cancer type specific	1	KIRP
ENSR00000156546	Cancer type specific	1	KIRP
ENSR00000023607	Cancer type specific	1	KIRP
10:3843919-3849919	Cancer type specific	1	KIRP
ENSR00000301875	Cancer type specific	1	KIRP
ENSR00000156549	Cancer type specific	1	KIRP
10:3862814-3868814	Cancer type specific	1	KIRP
10:3855922-3861922	Cancer type specific	1	KIRP
ENSR00000059105	Cancer type specific	1	KIRP
ENSR00000073513	Cancer type specific	1	KIRP
10:3863549-3869549	Cancer type specific	1	KIRP
11:63517885-63523885	Cancer type specific	1	KIRP
ENSR00000017716	Cancer type specific	1	KIRP
ENSR00000329071	Cancer type specific	1	KIRP
ENSR00000043191	Cancer type specific	1	KIRP
ENSR00000203911	Cancer type specific	1	KIRP
ENSR00000081513	Cancer type specific	1	KIRP
ENSR00000023606	Cancer type specific	1	KIRP
ENSR00000264340	Cancer type specific	1	KIRP
ENSR00000028317	Cancer type specific	1	KIRP
10:3854437-3860437	Cancer type specific	1	KIRP
ENSR00000259357	Cancer type specific	1	KIRP
ENSR00000329070	Cancer type specific	1	KIRP
ENSR00000251348	Cancer type specific	1	KIRP
ENSR00000138097	Cancer type specific	1	LGG
ENSR00000260547	Cancer type specific	1	LGG
ENSR00000141490	Cancer type specific	1	LGG
ENSR00000261106	Cancer type specific	1	LGG
ENSR00000023852	Cancer type specific	1	LGG
10:59061491-59067491	Cancer type specific	1	LGG
ENSR00000257844	Cancer type specific	1	LGG
ENSR00000020732	Cancer type specific	1	LGG
ENSR00000272229	Cancer type specific	1	LGG
ENSR00000034416	Cancer type specific	1	LGG
ENSR00000014226	Cancer type specific	1	LGG
ENSR00000279394	Cancer type specific	1	LGG
13:83856921-83862921	Cancer type specific	1	LGG
ENSR00000263627	Cancer type specific	1	LGG
ENSR00000298674	Cancer type specific	1	LGG
ENSR00000097928	Cancer type specific	1	LGG
10:24809122-24815122	Cancer type specific	1	LGG
ENSR00000020733	Cancer type specific	1	LGG
ENSR00000054507	Cancer type specific	1	LGG
16:839002-845002	Cancer type specific	1	LGG
ENSR00000097933	Cancer type specific	1	LGG
ENSR00000093209	Cancer type specific	1	LGG
ENSR00000274112	Cancer type specific	1	LGG
ENSR00000067690	Cancer type specific	1	LGG
ENSR00000133981	Cancer type specific	1	LGG
ENSR00000100748	Cancer type specific	1	LGG
ENSR00000287939	Cancer type specific	1	LGG
ENSR00000026447	Cancer type specific	1	LGG
ENSR00000137793	Cancer type specific	1	LGG
ENSR00000275080	Cancer type specific	1	LGG
ENSR00000039048	Cancer type specific	1	LGG
ENSR00000268107	Cancer type specific	1	LGG
ENSR00000036834	Cancer type specific	1	LGG
ENSR00000015173	Cancer type specific	1	LGG
ENSR00000110029	Cancer type specific	1	LGG
ENSR00000089539	Cancer type specific	1	LGG
ENSR00000281968	Cancer type specific	1	LGG
ENSR00000288621	Cancer type specific	1	LGG
ENSR00000133993	Cancer type specific	1	LGG
ENSR00000279393	Cancer type specific	1	LGG
ENSR00000138096	Cancer type specific	1	LGG
ENSR00000297112	Cancer type specific	1	LGG
ENSR00000027707	Cancer type specific	1	LGG
19:27677451-27683451	Cancer type specific	1	LGG
19:44317694-44323694	Cancer type specific	1	LGG
ENSR00000030804	Cancer type specific	1	LGG
ENSR00000287940	Cancer type specific	1	LGG
ENSR00000133687	Cancer type specific	1	LGG
ENSR00000015174	Cancer type specific	1	LGG
ENSR00000024006	Cancer type specific	1	LGG
ENSR00000029024	Cancer type specific	1	LGG
ENSR00000025690	Cancer type specific	1	LGG
10:6404938-6410938	Cancer type specific	1	LGG
ENSR00000021064	Cancer type specific	1	LGG
ENSR00000092459	Cancer type specific	1	LGG
ENSR00000040257	Cancer type specific	1	LGG
ENSR00000227511	Cancer type specific	1	LIHC
ENSR00000281811	Cancer type specific	1	LIHC
ENSR00000089075	Cancer type specific	1	LIHC
ENSR00000179322	Cancer type specific	1	LIHC
ENSR00000097601	Cancer type specific	1	LIHC
ENSR00000089074	Cancer type specific	1	LIHC
3:150732543-150738543	Cancer type specific	1	LIHC
11:1669940-1675940	Cancer type specific	1	LIHC
ENSR00000255657	Cancer type specific	1	LIHC
ENSR00000023772	Cancer type specific	1	LIHC
ENSR00000035819	Cancer type specific	1	LIHC
ENSR00000112414	Cancer type specific	1	LIHC
ENSR00000330867	Cancer type specific	1	LIHC
ENSR00000257981	Cancer type specific	1	LIHC
ENSR00000179319	Cancer type specific	1	LIHC
ENSR00000065696	Cancer type specific	1	LIHC
ENSR00000255656	Cancer type specific	1	LIHC
ENSR00000015996	Cancer type specific	1	LIHC
ENSR00000084999	Cancer type specific	1	LIHC
ENSR00000264282	Cancer type specific	1	LIHC
ENSR00000195065	Cancer type specific	1	LUAD
ENSR00000065715	Cancer type specific	1	LUAD
ENSR00000065714	Cancer type specific	1	LUAD
ENSR00000309302	Cancer type specific	1	LUAD
ENSR00000166907	Cancer type specific	1	LUAD
4:25550165-25556165	Cancer type specific	1	LUAD
ENSR00000208855	Cancer type specific	1	LUAD
ENSR00000140124	Cancer type specific	1	LUAD
ENSR00000329419	Cancer type specific	1	LUAD
ENSR00000208856	Cancer type specific	1	LUAD
ENSR00000220837	Cancer type specific	1	LUAD
ENSR00000324950	Cancer type specific	1	LUAD
ENSR00000043912	Cancer type specific	1	LUAD
ENSR00000166906	Cancer type specific	1	LUAD
ENSR00000195073	Cancer type specific	1	LUAD
ENSR00000208857	Cancer type specific	1	LUAD
4:25517601-25523601	Cancer type specific	1	LUAD
ENSR00000299409	Cancer type specific	1	LUAD
ENSR00000208858	Cancer type specific	1	LUAD
ENSR00000020567	Cancer type specific	1	LUAD
ENSR00000079356	Cancer type specific	1	LUAD
ENSR00000278359	Cancer type specific	1	LUAD
ENSR00000255187	Cancer type specific	1	LUAD
ENSR00000114464	Cancer type specific	1	LUAD
ENSR00000114466	Cancer type specific	1	LUAD
ENSR00000114465	Cancer type specific	1	LUAD
14:74448992-74454992	Cancer type specific	1	LUAD
ENSR00000055945	Cancer type specific	1	LUAD
9:135390850-135396850	Cancer type specific	1	LUAD
ENSR00000214079	Cancer type specific	1	LUAD
ENSR00000114468	Cancer type specific	1	LUAD
ENSR00000055944	Cancer type specific	1	LUAD
ENSR00000132514	Cancer type specific	1	LUSC
ENSR00000307970	Cancer type specific	1	LUSC
20:22229715-22235715	Cancer type specific	1	LUSC
ENSR00000307969	Cancer type specific	1	LUSC
ENSR00000132513	Cancer type specific	1	LUSC
ENSR00000296675	Cancer type specific	1	LUSC
ENSR00000035931	Cancer type specific	1	LUSC
ENSR00000154013	Cancer type specific	1	MESO
ENSR00000318945	Cancer type specific	1	MESO
ENSR00000205083	Cancer type specific	1	MESO
ENSR00000220372	Cancer type specific	1	MESO
ENSR00000037251	Cancer type specific	1	OV
3:112423657-112429657	Cancer type specific	1	OV
ENSR00000300005	Cancer type specific	1	OV
ENSR00000309134	Cancer type specific	1	OV
4:19567586-19573586	Cancer type specific	1	OV
ENSR00000264940	Cancer type specific	1	OV
19:9005790-9011790	Cancer type specific	1	OV
12:97521261-97527261	Cancer type specific	1	OV
ENSR00000127875	Cancer type specific	1	OV
ENSR00000287331	Cancer type specific	1	OV
ENSR00000106880	Cancer type specific	1	OV
2:28435662-28441662	Cancer type specific	1	OV
ENSR00000101882	Cancer type specific	1	OV
ENSR00000308484	Cancer type specific	1	OV
ENSR00000122976	Cancer type specific	1	OV
ENSR00000040883	Cancer type specific	1	OV
ENSR00000309138	Cancer type specific	1	OV
ENSR00000166516	Cancer type specific	1	OV
ENSR00000118256	Cancer type specific	1	OV
ENSR00000264471	Cancer type specific	1	OV
ENSR00000141016	Cancer type specific	1	OV
ENSR00000287442	Cancer type specific	1	OV
1:207852271-207858271	Cancer type specific	1	OV
ENSR00000310318	Cancer type specific	1	OV
4:19820513-19826513	Cancer type specific	1	OV
1:65039307-65045307	Cancer type specific	1	OV
12:66967363-66973363	Cancer type specific	1	OV
ENSR00000122975	Cancer type specific	1	OV
ENSR00000040882	Cancer type specific	1	OV
ENSR00000166517	Cancer type specific	1	OV
ENSR00000140614	Cancer type specific	1	OV
ENSR00000122977	Cancer type specific	1	OV
ENSR00000107218	Cancer type specific	1	OV
ENSR00000141017	Cancer type specific	1	OV
ENSR00000287441	Cancer type specific	1	OV
ENSR00000114602	Cancer type specific	1	OV
ENSR00000127876	Cancer type specific	1	OV
ENSR00000166495	Cancer type specific	1	OV
ENSR00000307120	Cancer type specific	1	OV
ENSR00000141010	Cancer type specific	1	OV
ENSR00000231714	Cancer type specific	1	OV
ENSR00000127879	Cancer type specific	1	OV
ENSR00000222671	Cancer type specific	1	OV
ENSR00000193125	Cancer type specific	1	OV
ENSR00000193126	Cancer type specific	1	OV
ENSR00000290784	Cancer type specific	1	OV
ENSR00000046189	Cancer type specific	1	OV
ENSR00000234589	Cancer type specific	1	OV
ENSR00000222670	Cancer type specific	1	OV
ENSR00000019203	Cancer type specific	1	OV
ENSR00000188603	Cancer type specific	1	PAAD
ENSR00000188602	Cancer type specific	1	PAAD
ENSR00000188601	Cancer type specific	1	PAAD
5:147801055-147807055	Cancer type specific	1	PAAD
5:147798615-147804615	Cancer type specific	1	PAAD
ENSR00000139319	Cancer type specific	1	PAAD
ENSR00000139317	Cancer type specific	1	PAAD
1:22174556-22180556	Cancer type specific	1	PAAD
ENSR00000134269	Cancer type specific	1	PCPG
ENSR00000262412	Cancer type specific	1	PCPG
ENSR00000035907	Cancer type specific	1	PCPG
ENSR00000280060	Cancer type specific	1	PCPG
ENSR00000115925	Cancer type specific	1	PCPG
ENSR00000290617	Cancer type specific	1	PCPG
ENSR00000199546	Cancer type specific	1	PCPG
2:41994538-42000538	Cancer type specific	1	PCPG
ENSR00000250990	Cancer type specific	1	PCPG
ENSR00000115919	Cancer type specific	1	PCPG
ENSR00000008092	Cancer type specific	1	PCPG
ENSR00000320390	Cancer type specific	1	PCPG
ENSR00000115926	Cancer type specific	1	PCPG
ENSR00000045377	Cancer type specific	1	PCPG
ENSR00000167918	Cancer type specific	1	PCPG
ENSR00000299924	Cancer type specific	1	PCPG
ENSR00000310389	Cancer type specific	1	PCPG
ENSR00000338074	Cancer type specific	1	PCPG
ENSR00000129108	Cancer type specific	1	PCPG
ENSR00000295643	Cancer type specific	1	PCPG
ENSR00000274084	Cancer type specific	1	PCPG
7:48079612-48085612	Cancer type specific	1	PCPG
21:28919547-28925547	Cancer type specific	1	PCPG
ENSR00000045378	Cancer type specific	1	PCPG
ENSR00000035908	Cancer type specific	1	PCPG
ENSR00000215302	Cancer type specific	1	PCPG
ENSR00000306100	Cancer type specific	1	PCPG
ENSR00000252324	Cancer type specific	1	PCPG
ENSR00000115924	Cancer type specific	1	PCPG
6:40384274-40390274	Cancer type specific	1	PCPG
ENSR00000121928	Cancer type specific	1	PCPG
ENSR00000008085	Cancer type specific	1	PCPG
ENSR00000099351	Cancer type specific	1	PCPG
ENSR00000211110	Cancer type specific	1	PRAD
ENSR00000334210	Cancer type specific	1	PRAD
ENSR00000211111	Cancer type specific	1	PRAD
ENSR00000273497	Cancer type specific	1	PRAD
ENSR00000259328	Cancer type specific	1	PRAD
ENSR00000117961	Cancer type specific	1	PRAD
ENSR00000175711	Cancer type specific	1	PRAD
ENSR00000104543	Cancer type specific	1	PRAD
ENSR00000232816	Cancer type specific	1	PRAD
ENSR00000334211	Cancer type specific	1	PRAD
ENSR00000299072	Cancer type specific	1	PRAD
ENSR00000273496	Cancer type specific	1	PRAD
ENSR00000306268	Cancer type specific	1	PRAD
ENSR00000158504	Cancer type specific	1	PRAD
ENSR00000236006	Cancer type specific	1	PRAD
ENSR00000095379	Cancer type specific	1	PRAD
ENSR00000300937	Cancer type specific	1	PRAD
ENSR00000236224	Cancer type specific	1	PRAD
ENSR00000306267	Cancer type specific	1	PRAD
ENSR00000288973	Cancer type specific	1	PRAD
ENSR00000158505	Cancer type specific	1	PRAD
ENSR00000273537	Cancer type specific	1	PRAD
ENSR00000139293	Cancer type specific	1	PRAD
ENSR00000337562	Cancer type specific	1	PRAD
ENSR00000278105	Cancer type specific	1	PRAD
ENSR00000078655	Cancer type specific	1	PRAD
ENSR00000059943	Cancer type specific	1	PRAD
ENSR00000273501	Cancer type specific	1	PRAD
ENSR00000119388	Cancer type specific	1	PRAD
ENSR00000293535	Cancer type specific	1	PRAD
ENSR00000027531	Cancer type specific	1	PRAD
ENSR00000259182	Cancer type specific	1	PRAD
ENSR00000259181	Cancer type specific	1	PRAD
ENSR00000102587	Cancer type specific	1	PRAD
ENSR00000269602	Cancer type specific	1	PRAD
12:93553027-93559027	Cancer type specific	1	PRAD
ENSR00000259183	Cancer type specific	1	PRAD
ENSR00000076042	Cancer type specific	1	PRAD
ENSR00000299074	Cancer type specific	1	PRAD
ENSR00000142580	Cancer type specific	1	PRAD
ENSR00000176004	Cancer type specific	1	PRAD
ENSR00000027167	Cancer type specific	1	PRAD
ENSR00000271167	Cancer type specific	1	PRAD
ENSR00000158506	Cancer type specific	1	PRAD
ENSR00000295044	Cancer type specific	1	PRAD
ENSR00000078669	Cancer type specific	1	PRAD
ENSR00000271168	Cancer type specific	1	PRAD
ENSR00000065152	Cancer type specific	1	PRAD
ENSR00000239243	Cancer type specific	1	PRAD
ENSR00000078670	Cancer type specific	1	PRAD
ENSR00000127172	Cancer type specific	1	PRAD
ENSR00000163995	Cancer type specific	1	PRAD
ENSR00000005963	Cancer type specific	1	PRAD
ENSR00000240655	Cancer type specific	1	PRAD
ENSR00000188679	Cancer type specific	1	PRAD
ENSR00000176005	Cancer type specific	1	PRAD
ENSR00000278112	Cancer type specific	1	PRAD
ENSR00000127166	Cancer type specific	1	PRAD
ENSR00000327514	Cancer type specific	1	PRAD
ENSR00000040149	Cancer type specific	1	PRAD
ENSR00000264237	Cancer type specific	1	PRAD
ENSR00000030827	Cancer type specific	1	PRAD
ENSR00000127171	Cancer type specific	1	PRAD
ENSR00000234121	Cancer type specific	1	PRAD
ENSR00000127160	Cancer type specific	1	PRAD
ENSR00000271169	Cancer type specific	1	PRAD
ENSR00000040005	Cancer type specific	1	PRAD
3:193867434-193873434	Cancer type specific	1	PRAD
3:193867820-193873820	Cancer type specific	1	PRAD
ENSR00000289457	Cancer type specific	1	PRAD
ENSR00000111982	Cancer type specific	1	PRAD
ENSR00000239675	Cancer type specific	1	PRAD
8:53399733-53405733	Cancer type specific	1	PRAD
ENSR00000059948	Cancer type specific	1	PRAD
ENSR00000295041	Cancer type specific	1	PRAD
ENSR00000019089	Cancer type specific	1	PRAD
ENSR00000271170	Cancer type specific	1	PRAD
ENSR00000211615	Cancer type specific	1	PRAD
ENSR00000019088	Cancer type specific	1	PRAD
ENSR00000059949	Cancer type specific	1	PRAD
ENSR00000209283	Cancer type specific	1	PRAD
ENSR00000019087	Cancer type specific	1	PRAD
ENSR00000127128	Cancer type specific	1	PRAD
ENSR00000321949	Cancer type specific	1	PRAD
2:180881503-180887503	Cancer type specific	1	PRAD
ENSR00000059947	Cancer type specific	1	PRAD
ENSR00000019090	Cancer type specific	1	PRAD
ENSR00000015203	Cancer type specific	1	PRAD
ENSR00000137834	Cancer type specific	1	PRAD
ENSR00000320425	Cancer type specific	1	PRAD
ENSR00000337689	Cancer type specific	1	PRAD
ENSR00000241043	Cancer type specific	1	PRAD
ENSR00000337688	Cancer type specific	1	PRAD
ENSR00000311733	Cancer type specific	1	PRAD
ENSR00000151345	Cancer type specific	1	PRAD
ENSR00000127131	Cancer type specific	1	PRAD
ENSR00000303681	Cancer type specific	1	PRAD
ENSR00000111983	Cancer type specific	1	PRAD
ENSR00000172329	Cancer type specific	1	PRAD
ENSR00000316552	Cancer type specific	1	SARC
ENSR00000184984	Cancer type specific	1	SARC
ENSR00000184985	Cancer type specific	1	SARC
ENSR00000290491	Cancer type specific	1	SARC
ENSR00000226971	Cancer type specific	1	SARC
ENSR00000147247	Cancer type specific	1	SARC
ENSR00000115434	Cancer type specific	1	SARC
ENSR00000061414	Cancer type specific	1	SARC
ENSR00000053830	Cancer type specific	1	SARC
ENSR00000269022	Cancer type specific	1	SARC
ENSR00000269955	Cancer type specific	1	SARC
ENSR00000056625	Cancer type specific	1	SARC
ENSR00000053832	Cancer type specific	1	SARC
ENSR00000207359	Cancer type specific	1	SARC
ENSR00000145852	Cancer type specific	1	SARC
ENSR00000140898	Cancer type specific	1	SARC
ENSR00000178276	Cancer type specific	1	SARC
21:26968002-26974002	Cancer type specific	1	SARC
ENSR00000053521	Cancer type specific	1	SARC
ENSR00000054916	Cancer type specific	1	SARC
6:169092935-169098935	Cancer type specific	1	SARC
ENSR00000288038	Cancer type specific	1	SARC
2:37781966-37787966	Cancer type specific	1	SARC
ENSR00000333745	Cancer type specific	1	SKCM
ENSR00000206725	Cancer type specific	1	SKCM
ENSR00000288134	Cancer type specific	1	SKCM
ENSR00000017338	Cancer type specific	1	SKCM
ENSR00000324136	Cancer type specific	1	SKCM
ENSR00000268870	Cancer type specific	1	SKCM
22:45144926-45150926	Cancer type specific	1	STAD
ENSR00000230580	Cancer type specific	1	STAD
ENSR00000308833	Cancer type specific	1	STAD
ENSR00000218045	Cancer type specific	1	STAD
7:131032720-131038720	Cancer type specific	1	STAD
ENSR00000262510	Cancer type specific	1	STAD
ENSR00000230606	Cancer type specific	1	STAD
13:50053647-50059647	Cancer type specific	1	STAD
ENSR00000041450	Cancer type specific	1	STAD
ENSR00000284353	Cancer type specific	1	STAD
ENSR00000221184	Cancer type specific	1	STAD
ENSR00000220684	Cancer type specific	1	STAD
ENSR00000221180	Cancer type specific	1	STAD
ENSR00000324884	Cancer type specific	1	STAD
ENSR00000221183	Cancer type specific	1	STAD
ENSR00000230632	Cancer type specific	1	STAD
ENSR00000284350	Cancer type specific	1	STAD
ENSR00000275761	Cancer type specific	1	STAD
ENSR00000097958	Cancer type specific	1	STAD
ENSR00000097964	Cancer type specific	1	STAD
ENSR00000097957	Cancer type specific	1	STAD
ENSR00000213504	Cancer type specific	1	STAD
ENSR00000084351	Cancer type specific	1	STAD
ENSR00000097959	Cancer type specific	1	STAD
ENSR00000284352	Cancer type specific	1	STAD
ENSR00000284349	Cancer type specific	1	STAD
ENSR00000001083	Cancer type specific	1	STAD
ENSR00000230631	Cancer type specific	1	STAD
ENSR00000261773	Cancer type specific	1	STAD
ENSR00000173695	Cancer type specific	1	STAD
ENSR00000041451	Cancer type specific	1	STAD
ENSR00000089171	Cancer type specific	1	STAD
ENSR00000308838	Cancer type specific	1	STAD
ENSR00000230607	Cancer type specific	1	STAD
ENSR00000214075	Cancer type specific	1	STAD
ENSR00000218079	Cancer type specific	1	STAD
ENSR00000218078	Cancer type specific	1	STAD
ENSR00000284351	Cancer type specific	1	STAD
ENSR00000315333	Cancer type specific	1	STAD
ENSR00000328380	Cancer type specific	1	STAD
ENSR00000173696	Cancer type specific	1	STAD
ENSR00000218080	Cancer type specific	1	STAD
ENSR00000315332	Cancer type specific	1	STAD
ENSR00000144957	Cancer type specific	1	STAD
ENSR00000144958	Cancer type specific	1	STAD
ENSR00000067207	Cancer type specific	1	STAD
ENSR00000226522	Cancer type specific	1	STAD
ENSR00000332056	Cancer type specific	1	STAD
ENSR00000308837	Cancer type specific	1	STAD
ENSR00000165803	Cancer type specific	1	STAD
ENSR00000032026	Cancer type specific	1	STAD
ENSR00000111405	Cancer type specific	1	TGCT
ENSR00000138945	Cancer type specific	1	TGCT
ENSR00000182733	Cancer type specific	1	TGCT
ENSR00000048560	Cancer type specific	1	TGCT
ENSR00000298946	Cancer type specific	1	TGCT
ENSR00000127562	Cancer type specific	1	TGCT
ENSR00000138946	Cancer type specific	1	TGCT
ENSR00000048559	Cancer type specific	1	TGCT
5:117045521-117051521	Cancer type specific	1	TGCT
ENSR00000062754	Cancer type specific	1	TGCT
4:179167389-179173389	Cancer type specific	1	TGCT
ENSR00000308514	Cancer type specific	1	TGCT
ENSR00000321443	Cancer type specific	1	TGCT
12:59320586-59326586	Cancer type specific	1	TGCT
ENSR00000251797	Cancer type specific	1	TGCT
ENSR00000272024	Cancer type specific	1	TGCT
ENSR00000046751	Cancer type specific	1	TGCT
ENSR00000081360	Cancer type specific	1	TGCT
15:93246767-93252767	Cancer type specific	1	TGCT
ENSR00000260872	Cancer type specific	1	TGCT
ENSR00000290160	Cancer type specific	1	TGCT
ENSR00000327893	Cancer type specific	1	TGCT
ENSR00000210272	Cancer type specific	1	TGCT
ENSR00000319640	Cancer type specific	1	TGCT
ENSR00000111089	Cancer type specific	1	TGCT
15:93248360-93254360	Cancer type specific	1	TGCT
ENSR00000327892	Cancer type specific	1	TGCT
ENSR00000307923	Cancer type specific	1	TGCT
ENSR00000251798	Cancer type specific	1	TGCT
ENSR00000031814	Cancer type specific	1	TGCT
ENSR00000286937	Cancer type specific	1	TGCT
ENSR00000327894	Cancer type specific	1	TGCT
ENSR00000239843	Cancer type specific	1	TGCT
ENSR00000253454	Cancer type specific	1	TGCT
ENSR00000288954	Cancer type specific	1	TGCT
ENSR00000050590	Cancer type specific	1	TGCT
ENSR00000323819	Cancer type specific	1	TGCT
1:212907186-212913186	Cancer type specific	1	TGCT
ENSR00000202094	Cancer type specific	1	TGCT
ENSR00000186432	Cancer type specific	1	TGCT
ENSR00000105460	Cancer type specific	1	TGCT
ENSR00000267784	Cancer type specific	1	TGCT
ENSR00000337359	Cancer type specific	1	TGCT
ENSR00000160487	Cancer type specific	1	TGCT
ENSR00000079073	Cancer type specific	1	TGCT
ENSR00000239842	Cancer type specific	1	TGCT
ENSR00000286936	Cancer type specific	1	TGCT
ENSR00000288744	Cancer type specific	1	TGCT
ENSR00000250749	Cancer type specific	1	TGCT
ENSR00000160486	Cancer type specific	1	TGCT
ENSR00000206455	Cancer type specific	1	TGCT
ENSR00000050589	Cancer type specific	1	TGCT
2:150112312-150118312	Cancer type specific	1	TGCT
ENSR00000283313	Cancer type specific	1	TGCT
ENSR00000105461	Cancer type specific	1	TGCT
ENSR00000110488	Cancer type specific	1	TGCT
ENSR00000335086	Cancer type specific	1	TGCT
ENSR00000268455	Cancer type specific	1	TGCT
ENSR00000268456	Cancer type specific	1	TGCT
ENSR00000265195	Cancer type specific	1	TGCT
ENSR00000166798	Cancer type specific	1	TGCT
ENSR00000322421	Cancer type specific	1	TGCT
ENSR00000301358	Cancer type specific	1	TGCT
ENSR00000316830	Cancer type specific	1	TGCT
ENSR00000042938	Cancer type specific	1	TGCT
ENSR00000006727	Cancer type specific	1	TGCT
ENSR00000282703	Cancer type specific	1	TGCT
ENSR00000045675	Cancer type specific	1	TGCT
ENSR00000163251	Cancer type specific	1	TGCT
ENSR00000312997	Cancer type specific	1	TGCT
ENSR00000303548	Cancer type specific	1	TGCT
ENSR00000003123	Cancer type specific	1	TGCT
16:7979932-7985932	Cancer type specific	1	TGCT
ENSR00000207560	Cancer type specific	1	TGCT
ENSR00000296567	Cancer type specific	1	TGCT
ENSR00000133855	Cancer type specific	1	TGCT
ENSR00000033841	Cancer type specific	1	TGCT
ENSR00000033840	Cancer type specific	1	TGCT
ENSR00000295358	Cancer type specific	1	TGCT
ENSR00000132208	Cancer type specific	1	TGCT
ENSR00000296568	Cancer type specific	1	TGCT
6:168410215-168416215	Cancer type specific	1	TGCT
ENSR00000297394	Cancer type specific	1	TGCT
ENSR00000134730	Cancer type specific	1	TGCT
ENSR00000297393	Cancer type specific	1	TGCT
ENSR00000178843	Cancer type specific	1	TGCT
7:157431971-157437971	Cancer type specific	1	TGCT
ENSR00000307872	Cancer type specific	1	TGCT
ENSR00000128072	Cancer type specific	1	TGCT
ENSR00000301962	Cancer type specific	1	TGCT
ENSR00000232519	Cancer type specific	1	TGCT
ENSR00000283496	Cancer type specific	1	TGCT
ENSR00000137164	Cancer type specific	1	TGCT
ENSR00000310078	Cancer type specific	1	TGCT
ENSR00000132209	Cancer type specific	1	TGCT
ENSR00000134023	Cancer type specific	1	TGCT
ENSR00000268666	Cancer type specific	1	TGCT
ENSR00000306808	Cancer type specific	1	TGCT
1:223027446-223033446	Cancer type specific	1	TGCT
ENSR00000090070	Cancer type specific	1	TGCT
ENSR00000283960	Cancer type specific	1	TGCT
ENSR00000096379	Cancer type specific	1	TGCT
ENSR00000214056	Cancer type specific	1	TGCT
ENSR00000319840	Cancer type specific	1	TGCT
ENSR00000261531	Cancer type specific	1	TGCT
ENSR00000214055	Cancer type specific	1	TGCT
20:53861110-53867110	Cancer type specific	1	TGCT
ENSR00000227327	Cancer type specific	1	TGCT
ENSR00000081359	Cancer type specific	1	TGCT
ENSR00000204126	Cancer type specific	1	TGCT
ENSR00000048424	Cancer type specific	1	TGCT
ENSR00000079074	Cancer type specific	1	TGCT
ENSR00000205575	Cancer type specific	1	TGCT
ENSR00000304223	Cancer type specific	1	TGCT
1:223027761-223033761	Cancer type specific	1	TGCT
15:93244241-93250241	Cancer type specific	1	TGCT
ENSR00000263183	Cancer type specific	1	TGCT
ENSR00000267024	Cancer type specific	1	TGCT
ENSR00000272201	Cancer type specific	1	TGCT
ENSR00000033839	Cancer type specific	1	TGCT
ENSR00000313087	Cancer type specific	1	TGCT
ENSR00000313086	Cancer type specific	1	TGCT
ENSR00000207559	Cancer type specific	1	TGCT
ENSR00000209650	Cancer type specific	1	TGCT
ENSR00000325224	Cancer type specific	1	TGCT
19:380135-386135	Cancer type specific	1	TGCT
ENSR00000326447	Cancer type specific	1	TGCT
ENSR00000140928	Cancer type specific	1	TGCT
ENSR00000334419	Cancer type specific	1	TGCT
ENSR00000275358	Cancer type specific	1	TGCT
ENSR00000072905	Cancer type specific	1	TGCT
ENSR00000232962	Cancer type specific	1	TGCT
ENSR00000153099	Cancer type specific	1	TGCT
ENSR00000326510	Cancer type specific	1	TGCT
ENSR00000316684	Cancer type specific	1	TGCT
ENSR00000334462	Cancer type specific	1	TGCT
ENSR00000267023	Cancer type specific	1	TGCT
ENSR00000207061	Cancer type specific	1	TGCT
ENSR00000140929	Cancer type specific	1	TGCT
ENSR00000320022	Cancer type specific	1	TGCT
ENSR00000227328	Cancer type specific	1	TGCT
ENSR00000105458	Cancer type specific	1	TGCT
ENSR00000317621	Cancer type specific	1	TGCT
ENSR00000117571	Cancer type specific	1	TGCT
ENSR00000312965	Cancer type specific	1	TGCT
ENSR00000059232	Cancer type specific	1	TGCT
ENSR00000329602	Cancer type specific	1	TGCT
ENSR00000332258	Cancer type specific	1	TGCT
ENSR00000322914	Cancer type specific	1	TGCT
ENSR00000232520	Cancer type specific	1	TGCT
ENSR00000103763	Cancer type specific	1	TGCT
ENSR00000326509	Cancer type specific	1	TGCT
ENSR00000072906	Cancer type specific	1	TGCT
ENSR00000232518	Cancer type specific	1	TGCT
ENSR00000327535	Cancer type specific	1	TGCT
ENSR00000253633	Cancer type specific	1	TGCT
ENSR00000134024	Cancer type specific	1	TGCT
ENSR00000293405	Cancer type specific	1	TGCT
ENSR00000265328	Cancer type specific	1	TGCT
ENSR00000326466	Cancer type specific	1	TGCT
ENSR00000251570	Cancer type specific	1	TGCT
13:54244423-54250423	Cancer type specific	1	TGCT
ENSR00000107421	Cancer type specific	1	TGCT
ENSR00000026054	Cancer type specific	1	TGCT
ENSR00000026055	Cancer type specific	1	TGCT
ENSR00000052750	Cancer type specific	1	TGCT
ENSR00000250076	Cancer type specific	1	TGCT
ENSR00000329323	Cancer type specific	1	TGCT
ENSR00000301523	Cancer type specific	1	TGCT
ENSR00000237088	Cancer type specific	1	TGCT
ENSR00000250337	Cancer type specific	1	TGCT
ENSR00000250669	Cancer type specific	1	TGCT
ENSR00000302864	Cancer type specific	1	TGCT
ENSR00000267053	Cancer type specific	1	TGCT
ENSR00000219977	Cancer type specific	1	TGCT
ENSR00000231250	Cancer type specific	1	THCA
ENSR00000231251	Cancer type specific	1	THCA
ENSR00000336932	Cancer type specific	1	THCA
ENSR00000239213	Cancer type specific	1	THCA
ENSR00000337189	Cancer type specific	1	THCA
ENSR00000238547	Cancer type specific	1	THCA
ENSR00000239215	Cancer type specific	1	THCA
ENSR00000253733	Cancer type specific	1	THCA
ENSR00000231252	Cancer type specific	1	THCA
ENSR00000011826	Cancer type specific	1	THCA
ENSR00000238542	Cancer type specific	1	THCA
ENSR00000239216	Cancer type specific	1	THCA
ENSR00000239214	Cancer type specific	1	THCA
ENSR00000337190	Cancer type specific	1	THCA
ENSR00000053486	Cancer type specific	1	THCA
ENSR00000011827	Cancer type specific	1	THCA
ENSR00000336936	Cancer type specific	1	THCA
ENSR00000238540	Cancer type specific	1	THCA
ENSR00000101797	Cancer type specific	1	THCA
ENSR00000329099	Cancer type specific	1	THCA
ENSR00000053487	Cancer type specific	1	THCA
ENSR00000268928	Cancer type specific	1	THCA
ENSR00000238548	Cancer type specific	1	THCA
ENSR00000238546	Cancer type specific	1	THCA
ENSR00000336931	Cancer type specific	1	THCA
ENSR00000053485	Cancer type specific	1	THCA
ENSR00000239219	Cancer type specific	1	THCA
ENSR00000032740	Cancer type specific	1	THCA
ENSR00000238541	Cancer type specific	1	THCA
ENSR00000006865	Cancer type specific	1	THCA
ENSR00000252000	Cancer type specific	1	THCA
ENSR00000011824	Cancer type specific	1	THCA
ENSR00000251999	Cancer type specific	1	THCA
ENSR00000238556	Cancer type specific	1	THCA
ENSR00000253732	Cancer type specific	1	THCA
ENSR00000011825	Cancer type specific	1	THCA
ENSR00000252001	Cancer type specific	1	THCA
ENSR00000011823	Cancer type specific	1	THCA
ENSR00000119681	Cancer type specific	1	THCA
ENSR00000268922	Cancer type specific	1	THCA
ENSR00000053469	Cancer type specific	1	THCA
ENSR00000338162	Cancer type specific	1	THCA
ENSR00000097648	Cancer type specific	1	THCA
ENSR00000239218	Cancer type specific	1	THCA
ENSR00000310815	Cancer type specific	1	THCA
ENSR00000091056	Cancer type specific	1	THCA
ENSR00000242558	Cancer type specific	1	THCA
ENSR00000119682	Cancer type specific	1	THCA
ENSR00000006911	Cancer type specific	1	THCA
ENSR00000282343	Cancer type specific	1	THCA
ENSR00000109161	Cancer type specific	1	THCA
ENSR00000242884	Cancer type specific	1	THCA
ENSR00000006910	Cancer type specific	1	THCA
ENSR00000238094	Cancer type specific	1	THCA
ENSR00000006909	Cancer type specific	1	THCA
ENSR00000338167	Cancer type specific	1	THCA
ENSR00000221146	Cancer type specific	1	THCA
ENSR00000033340	Cancer type specific	1	THCA
ENSR00000270493	Cancer type specific	1	THCA
ENSR00000006904	Cancer type specific	1	THCA
ENSR00000253730	Cancer type specific	1	THCA
ENSR00000011817	Cancer type specific	1	THCA
ENSR00000053488	Cancer type specific	1	THCA
ENSR00000011816	Cancer type specific	1	THCA
ENSR00000336935	Cancer type specific	1	THCA
ENSR00000253729	Cancer type specific	1	THCA
ENSR00000001593	Cancer type specific	1	THCA
ENSR00000136176	Cancer type specific	1	THCA
ENSR00000119674	Cancer type specific	1	THCA
ENSR00000238552	Cancer type specific	1	THCA
ENSR00000033341	Cancer type specific	1	THCA
ENSR00000282966	Cancer type specific	1	THCA
ENSR00000258544	Cancer type specific	1	THCA
ENSR00000322396	Cancer type specific	1	THCA
1:55970265-55976265	Cancer type specific	1	THCA
ENSR00000310817	Cancer type specific	1	THCA
ENSR00000251062	Cancer type specific	1	THYM
ENSR00000187038	Cancer type specific	1	THYM
ENSR00000191715	Cancer type specific	1	THYM
13:99400715-99406715	Cancer type specific	1	THYM
ENSR00000139840	Cancer type specific	1	THYM
ENSR00000299301	Cancer type specific	1	THYM
ENSR00000143788	Cancer type specific	1	THYM
8:58795258-58801258	Cancer type specific	1	THYM
ENSR00000205102	Cancer type specific	1	THYM
ENSR00000323689	Cancer type specific	1	THYM
ENSR00000029630	Cancer type specific	1	THYM
ENSR00000176539	Cancer type specific	1	THYM
ENSR00000029629	Cancer type specific	1	THYM
ENSR00000139843	Cancer type specific	1	THYM
ENSR00000146542	Cancer type specific	1	THYM
ENSR00000254750	Cancer type specific	1	THYM
18:12762251-12768251	Cancer type specific	1	THYM
ENSR00000098654	Cancer type specific	1	THYM
ENSR00000139842	Cancer type specific	1	THYM
ENSR00000297697	Cancer type specific	1	THYM
17:76992631-76998631	Cancer type specific	1	THYM
14:22408484-22414484	Cancer type specific	1	THYM
4:8243004-8249004	Cancer type specific	1	THYM
ENSR00000171712	Cancer type specific	1	THYM
ENSR00000139844	Cancer type specific	1	THYM
2:38154367-38160367	Cancer type specific	1	THYM
ENSR00000289497	Cancer type specific	1	THYM
ENSR00000112053	Cancer type specific	1	THYM
ENSR00000273051	Cancer type specific	1	THYM
13:104820131-104826131	Cancer type specific	1	THYM
ENSR00000101013	Cancer type specific	1	THYM
20:24727044-24733044	Cancer type specific	1	THYM
ENSR00000075191	Cancer type specific	1	THYM
ENSR00000029631	Cancer type specific	1	THYM
5:178827920-178833920	Cancer type specific	1	THYM
ENSR00000120397	Cancer type specific	1	THYM
ENSR00000139841	Cancer type specific	1	THYM
ENSR00000187032	Cancer type specific	1	THYM
ENSR00000131368	Cancer type specific	1	THYM
ENSR00000297695	Cancer type specific	1	THYM
ENSR00000165779	Cancer type specific	1	THYM
ENSR00000308785	Cancer type specific	1	THYM
ENSR00000156292	Cancer type specific	1	THYM
ENSR00000171711	Cancer type specific	1	THYM
ENSR00000027156	Cancer type specific	1	THYM
20:24726489-24732489	Cancer type specific	1	THYM
20:25087832-25093832	Cancer type specific	1	THYM
20:25088240-25094240	Cancer type specific	1	THYM
ENSR00000120398	Cancer type specific	1	THYM
10:14989478-14995478	Cancer type specific	1	THYM
ENSR00000089588	Cancer type specific	1	THYM
ENSR00000035304	Cancer type specific	1	THYM
ENSR00000297696	Cancer type specific	1	THYM
ENSR00000006772	Cancer type specific	1	THYM
ENSR00000318878	Cancer type specific	1	THYM
ENSR00000135804	Cancer type specific	1	THYM
ENSR00000284687	Cancer type specific	1	THYM
ENSR00000135515	Cancer type specific	1	THYM
ENSR00000179482	Cancer type specific	1	THYM
ENSR00000089587	Cancer type specific	1	THYM
ENSR00000098775	Cancer type specific	1	THYM
ENSR00000281412	Cancer type specific	1	THYM
ENSR00000135514	Cancer type specific	1	THYM
ENSR00000302300	Cancer type specific	1	THYM
ENSR00000143782	Cancer type specific	1	THYM
ENSR00000131369	Cancer type specific	1	THYM
ENSR00000131370	Cancer type specific	1	THYM
ENSR00000172546	Cancer type specific	1	THYM
ENSR00000311787	Cancer type specific	1	THYM
ENSR00000318877	Cancer type specific	1	THYM
ENSR00000007434	Cancer type specific	1	THYM
ENSR00000273659	Cancer type specific	1	THYM
ENSR00000010746	Cancer type specific	1	THYM
ENSR00000084103	Cancer type specific	1	THYM
ENSR00000065094	Cancer type specific	1	THYM
ENSR00000305436	Cancer type specific	1	THYM
ENSR00000084104	Cancer type specific	1	THYM
ENSR00000338000	Cancer type specific	1	THYM
ENSR00000299302	Cancer type specific	1	THYM
ENSR00000087728	Cancer type specific	1	THYM
ENSR00000135513	Cancer type specific	1	THYM
ENSR00000083035	Cancer type specific	1	THYM
ENSR00000103637	Cancer type specific	1	THYM
ENSR00000187027	Cancer type specific	1	THYM
ENSR00000187026	Cancer type specific	1	THYM
ENSR00000299299	Cancer type specific	1	THYM
ENSR00000029632	Cancer type specific	1	THYM
ENSR00000310500	Cancer type specific	1	THYM
ENSR00000065093	Cancer type specific	1	THYM
10:46078054-46084054	Cancer type specific	1	THYM
ENSR00000065095	Cancer type specific	1	THYM
ENSR00000027533	Cancer type specific	1	THYM
ENSR00000094945	Cancer type specific	1	THYM
ENSR00000035310	Cancer type specific	1	THYM
ENSR00000302969	Cancer type specific	1	THYM
ENSR00000281420	Cancer type specific	1	THYM
ENSR00000061766	Cancer type specific	1	THYM
13:44175623-44181623	Cancer type specific	1	THYM
ENSR00000120399	Cancer type specific	1	THYM
ENSR00000146545	Cancer type specific	1	THYM
ENSR00000292412	Cancer type specific	1	THYM
ENSR00000120400	Cancer type specific	1	THYM
ENSR00000302218	Cancer type specific	1	THYM
ENSR00000143651	Cancer type specific	1	THYM
ENSR00000265570	Cancer type specific	1	UCEC
ENSR00000260534	Cancer type specific	1	UCEC
ENSR00000304404	Cancer type specific	1	UCEC
ENSR00000153721	Cancer type specific	1	UCEC
ENSR00000203615	Cancer type specific	1	UCS
ENSR00000020473	Cancer type specific	1	UCS
ENSR00000264413	Cancer type specific	1	UCS
ENSR00000229641	Cancer type specific	1	UCS
ENSR00000300569	Cancer type specific	1	UVM
ENSR00000104458	Cancer type specific	1	UVM
ENSR00000300568	Cancer type specific	1	UVM
ENSR00000074199	Cancer type specific	1	UVM
ENSR00000261985	Cancer type specific	1	UVM
ENSR00000217182	Cancer type specific	1	UVM
ENSR00000104459	Cancer type specific	1	UVM
10:3393200-3399200	Intermediately specific	2	BLCA, SKCM
ENSR00000324757	Intermediately specific	6	THYM, LUAD, LUSC, BLCA, UCS, TGCT
ENSR00000164366	Intermediately specific	4	LUSC, CHOL, BLCA, CESC
ENSR00000251064	Intermediately specific	4	THYM, PAAD, BLCA, CRC
ENSR00000004207	Intermediately specific	4	THYM, PAAD, BLCA, CRC
ENSR00000027726	Intermediately specific	5	HNSC, MESO, CHOL, BLCA, CESC
ENSR00000321477	Intermediately specific	2	BLCA, SARC
ENSR00000198927	Intermediately specific	2	BLCA, SARC
ENSR00000298226	Intermediately specific	3	CHOL, BLCA, TGCT
ENSR00000136364	Intermediately specific	3	CHOL, BLCA, TGCT
ENSR00000079292	Intermediately specific	3	LIHC, BLCA, TGCT
ENSR00000107667	Intermediately specific	3	BRCA, BLCA, PRAD
ENSR00000287800	Intermediately specific	9	THCA, LUAD, BRCA, KICH, UCS, UCEC, OV, PRAD, TGCT
ENSR00000045056	Intermediately specific	2	BRCA, SKCM
ENSR00000290529	Intermediately specific	2	BRCA, TGCT
ENSR00000133367	Intermediately specific	2	THYM, BRCA
ENSR00000287617	Intermediately specific	2	BRCA, PRAD
ENSR00000059952	Intermediately specific	2	BRCA, PRAD
ENSR00000291926	Intermediately specific	7	DLBC, MESO, BRCA, CHOL, PAAD, KIRC, SARC
ENSR00000213745	Intermediately specific	6	GBM, LGG, BRCA, CHOL, KIRP, OV
ENSR00000326779	Intermediately specific	6	GBM, LGG, BRCA, CHOL, KIRP, OV
ENSR00000321549	Intermediately specific	4	THYM, BRCA, PRAD, TGCT
ENSR00000208878	Intermediately specific	4	LUAD, BRCA, PAAD, BLCA
ENSR00000189171	Intermediately specific	3	DLBC, BRCA, STAD
ENSR00000163698	Intermediately specific	3	HNSC, LUSC, CESC
3:189933342-189939342	Intermediately specific	3	HNSC, LUSC, CESC
ENSR00000317885	Intermediately specific	3	HNSC, LUSC, CESC
ENSR00000188848	Intermediately specific	2	HNSC, CESC
ENSR00000188847	Intermediately specific	2	HNSC, CESC
ENSR00000099473	Intermediately specific	2	CESC, UCEC
ENSR00000007157	Intermediately specific	9	LUAD, LUSC, BRCA, BLCA, CESC, UCS, UCEC, OV, PRAD
ENSR00000104452	Intermediately specific	3	BLCA, CESC, UCEC
ENSR00000206390	Intermediately specific	2	BLCA, CESC
ENSR00000337904	Intermediately specific	3	HNSC, LUSC, CESC
ENSR00000337906	Intermediately specific	3	HNSC, LUSC, CESC
ENSR00000206389	Intermediately specific	2	BLCA, CESC
ENSR00000113728	Intermediately specific	3	HNSC, BLCA, CESC
9:128778410-128784410	Intermediately specific	3	HNSC, LUSC, CESC
ENSR00000324031	Intermediately specific	2	BLCA, CESC
ENSR00000279289	Intermediately specific	4	THYM, MESO, CESC, SARC
ENSR00000260157	Intermediately specific	3	CESC, UCS, UCEC
ENSR00000113747	Intermediately specific	2	BLCA, CESC
ENSR00000113748	Intermediately specific	2	BLCA, CESC
ENSR00000298756	Intermediately specific	6	MESO, KIRC, KIRP, ACC, CESC, SARC
ENSR00000113746	Intermediately specific	2	BLCA, CESC
ENSR00000186568	Intermediately specific	4	THYM, CHOL, STAD, CRC
ENSR00000252733	Intermediately specific	7	THCA, BRCA, CHOL, PAAD, BLCA, SKCM, CRC
ENSR00000016276	Intermediately specific	2	STAD, CRC
ENSR00000009091	Intermediately specific	5	CHOL, PAAD, BLCA, SKCM, CRC
4:75178550-75184550	Intermediately specific	2	KICH, CRC
ENSR00000271903	Intermediately specific	2	DLBC, CRC
ENSR00000303393	Intermediately specific	2	THYM, CRC
ENSR00000026507	Intermediately specific	2	TGCT, CRC
ENSR00000236170	Intermediately specific	4	STAD, UCEC, OV, CRC
ENSR00000336075	Intermediately specific	4	STAD, UCEC, OV, CRC
ENSR00000219496	Intermediately specific	2	UCEC, CRC
ENSR00000328912	Intermediately specific	2	UCEC, CRC
ENSR00000212577	Intermediately specific	2	GBM, LGG
ENSR00000212595	Intermediately specific	2	GBM, LGG
ENSR00000303727	Intermediately specific	5	GBM, LGG, BRCA, PAAD, SARC
ENSR00000151870	Intermediately specific	3	GBM, BRCA, PRAD
13:110126817-110132817	Intermediately specific	2	GBM, LUSC
ENSR00000005094	Intermediately specific	6	GBM, LGG, PCPG, THCA, LUAD, UCS
ENSR00000152018	Intermediately specific	6	GBM, LGG, PCPG, THYM, UCS, TGCT
ENSR00000126291	Intermediately specific	2	GBM, LGG
3:152654238-152660238	Intermediately specific	2	GBM, LGG
5:154424936-154430936	Intermediately specific	5	GBM, LGG, KICH, ACC, SARC
ENSR00000183640	Intermediately specific	2	GBM, LGG
ENSR00000240675	Intermediately specific	5	GBM, LGG, PCPG, KIRC, SARC
ENSR00000303874	Intermediately specific	2	GBM, BRCA
ENSR00000219579	Intermediately specific	5	GBM, LGG, PCPG, DLBC, THYM
3:16241226-16247226	Intermediately specific	2	GBM, LGG
ENSR00000216696	Intermediately specific	2	GBM, LGG
ENSR00000337400	Intermediately specific	2	GBM, LGG
ENSR00000329852	Intermediately specific	2	GBM, LGG
ENSR00000326490	Intermediately specific	4	GBM, BRCA, KICH, SARC
ENSR00000192254	Intermediately specific	2	GBM, LGG
ENSR00000326489	Intermediately specific	4	GBM, BRCA, KICH, SARC
ENSR00000117383	Intermediately specific	2	GBM, MESO
ENSR00000206814	Intermediately specific	2	GBM, LGG
ENSR00000053393	Intermediately specific	4	GBM, STAD, UCEC, OV
ENSR00000224693	Intermediately specific	3	GBM, STAD, OV
ENSR00000224692	Intermediately specific	3	GBM, STAD, OV
ENSR00000126290	Intermediately specific	2	GBM, LGG
1:153574259-153580259	Intermediately specific	3	HNSC, LUSC, CESC
ENSR00000254547	Intermediately specific	3	HNSC, LUSC, CESC
ENSR00000013808	Intermediately specific	3	HNSC, LUSC, CESC
ENSR00000324642	Intermediately specific	3	HNSC, LUSC, CESC
ENSR00000250663	Intermediately specific	3	HNSC, LUSC, CESC
ENSR00000182804	Intermediately specific	4	HNSC, LUSC, CESC, TGCT
ENSR00000256788	Intermediately specific	4	HNSC, LUSC, BLCA, CESC
ENSR00000264169	Intermediately specific	2	HNSC, LUSC
ENSR00000054111	Intermediately specific	2	HNSC, TGCT
ENSR00000317887	Intermediately specific	2	HNSC, CESC
ENSR00000207996	Intermediately specific	3	HNSC, LUSC, CESC
ENSR00000020394	Intermediately specific	3	HNSC, LUSC, BLCA
ENSR00000313384	Intermediately specific	3	HNSC, LUSC, CESC
ENSR00000207997	Intermediately specific	3	HNSC, LUSC, CESC
ENSR00000145129	Intermediately specific	3	HNSC, LUSC, TGCT
ENSR00000142605	Intermediately specific	3	HNSC, LUSC, CESC
ENSR00000013810	Intermediately specific	3	HNSC, LUSC, CESC
ENSR00000282076	Intermediately specific	3	HNSC, CESC, TGCT
ENSR00000285161	Intermediately specific	2	HNSC, TGCT
3:165494802-165500802	Intermediately specific	7	GBM, LGG, HNSC, LUSC, KIRC, KIRP, BLCA
ENSR00000281612	Intermediately specific	2	HNSC, LUSC
ENSR00000302515	Intermediately specific	3	HNSC, LUSC, CESC
ENSR00000302514	Intermediately specific	3	HNSC, LUSC, CESC
ENSR00000301860	Intermediately specific	3	HNSC, CESC, TGCT
ENSR00000113727	Intermediately specific	2	HNSC, BLCA
ENSR00000322897	Intermediately specific	2	HNSC, LUSC
ENSR00000163136	Intermediately specific	3	HNSC, LUSC, CESC
ENSR00000142606	Intermediately specific	2	HNSC, CESC
ENSR00000318417	Intermediately specific	2	HNSC, TGCT
8:129701220-129707220	Intermediately specific	2	HNSC, CESC
ENSR00000105344	Intermediately specific	3	HNSC, LUSC, CESC
ENSR00000321886	Intermediately specific	2	HNSC, TGCT
ENSR00000055223	Intermediately specific	2	HNSC, LUSC
ENSR00000029622	Intermediately specific	2	HNSC, TGCT
ENSR00000299273	Intermediately specific	3	HNSC, THYM, CESC
ENSR00000307921	Intermediately specific	7	HNSC, LUSC, MESO, CESC, UCS, TGCT, SARC
ENSR00000199789	Intermediately specific	2	HNSC, TGCT
ENSR00000226414	Intermediately specific	2	HNSC, CESC
ENSR00000013811	Intermediately specific	3	HNSC, LUSC, CESC
ENSR00000274076	Intermediately specific	3	HNSC, CESC, TGCT
ENSR00000142604	Intermediately specific	2	HNSC, CESC
ENSR00000322859	Intermediately specific	2	HNSC, TGCT
ENSR00000146067	Intermediately specific	4	LGG, HNSC, CESC, SARC
ENSR00000158153	Intermediately specific	3	HNSC, CESC, SKCM
ENSR00000204782	Intermediately specific	2	HNSC, TGCT
ENSR00000332994	Intermediately specific	2	HNSC, BRCA
ENSR00000298296	Intermediately specific	2	HNSC, TGCT
ENSR00000256946	Intermediately specific	2	HNSC, TGCT
20:36972268-36978268	Intermediately specific	2	HNSC, TGCT
ENSR00000325900	Intermediately specific	2	HNSC, BRCA
ENSR00000264070	Intermediately specific	4	HNSC, CHOL, PAAD, KIRC
ENSR00000032534	Intermediately specific	3	KIRC, KIRP, KICH
ENSR00000261119	Intermediately specific	3	KIRC, KIRP, KICH
ENSR00000164664	Intermediately specific	2	PCPG, KICH
ENSR00000122295	Intermediately specific	4	GBM, MESO, BRCA, KICH
ENSR00000308344	Intermediately specific	2	PCPG, KICH
ENSR00000336448	Intermediately specific	3	UVM, KICH, UCEC
ENSR00000122296	Intermediately specific	5	GBM, MESO, BRCA, CHOL, KICH
ENSR00000293168	Intermediately specific	5	GBM, MESO, BRCA, CHOL, KICH
ENSR00000231302	Intermediately specific	3	HNSC, KIRC, KICH
ENSR00000089201	Intermediately specific	2	CHOL, KIRC
7:53395636-53401636	Intermediately specific	2	KIRC, KIRP
ENSR00000212043	Intermediately specific	2	KIRC, BLCA
ENSR00000136584	Intermediately specific	2	KIRC, BLCA
ENSR00000258636	Intermediately specific	3	DLBC, CHOL, KIRC
ENSR00000265971	Intermediately specific	2	MESO, KIRC
ENSR00000029146	Intermediately specific	2	KIRC, KIRP
1:67399291-67405291	Intermediately specific	5	UVM, HNSC, KIRC, CESC, SKCM
ENSR00000293390	Intermediately specific	2	KIRC, KIRP
ENSR00000165132	Intermediately specific	2	KIRC, OV
ENSR00000045244	Intermediately specific	2	MESO, KIRC
ENSR00000091917	Intermediately specific	5	LUAD, CHOL, KIRC, KIRP, KICH
ENSR00000091918	Intermediately specific	5	LUAD, CHOL, KIRC, KIRP, KICH
ENSR00000045242	Intermediately specific	2	MESO, KIRC
12:68419290-68425290	Intermediately specific	3	DLBC, THYM, KIRC
ENSR00000263320	Intermediately specific	2	KIRC, KIRP
ENSR00000132260	Intermediately specific	2	LIHC, KIRC
ENSR00000060638	Intermediately specific	4	DLBC, THYM, KIRC, KIRP
ENSR00000119827	Intermediately specific	6	THCA, DLBC, MESO, BRCA, KIRC, SARC
ENSR00000307958	Intermediately specific	2	KIRC, KICH
ENSR00000236570	Intermediately specific	2	KIRC, KIRP
ENSR00000163351	Intermediately specific	2	KIRC, KICH
ENSR00000291916	Intermediately specific	5	THCA, DLBC, MESO, KIRC, SARC
ENSR00000041924	Intermediately specific	2	KIRC, OV
ENSR00000092878	Intermediately specific	8	DLBC, MESO, LIHC, CHOL, PAAD, KIRC, KIRP, BLCA
ENSR00000264545	Intermediately specific	2	STAD, KIRC
3:194504217-194510217	Intermediately specific	3	CHOL, KIRC, OV
6:47860868-47866868	Intermediately specific	4	LGG, KIRC, KIRP, KICH
ENSR00000155178	Intermediately specific	2	THYM, KIRC
ENSR00000226793	Intermediately specific	7	LGG, THCA, BRCA, CHOL, KIRC, KIRP, KICH
ENSR00000006725	Intermediately specific	2	KIRC, KICH
ENSR00000077095	Intermediately specific	2	KIRC, KICH
ENSR00000191319	Intermediately specific	7	LUAD, MESO, BRCA, CHOL, STAD, KIRC, OV
13:22881603-22887603	Intermediately specific	6	KIRC, KIRP, CESC, UCS, UCEC, OV
ENSR00000326250	Intermediately specific	2	KIRC, KIRP
ENSR00000156548	Intermediately specific	3	KIRC, KIRP, KICH
3:112379306-112385306	Intermediately specific	3	KIRC, KIRP, KICH
ENSR00000156547	Intermediately specific	3	KIRC, KIRP, KICH
3:112381813-112387813	Intermediately specific	3	KIRC, KIRP, KICH
ENSR00000189499	Intermediately specific	6	DLBC, THYM, KIRC, KIRP, KICH, SARC
ENSR00000046852	Intermediately specific	4	DLBC, KIRC, KIRP, KICH
ENSR00000046851	Intermediately specific	4	DLBC, KIRC, KIRP, KICH
ENSR00000141033	Intermediately specific	2	KIRC, KIRP
14:103068450-103074450	Intermediately specific	2	KIRC, KIRP
ENSR00000201130	Intermediately specific	5	KIRC, KIRP, UCS, UCEC, OV
ENSR00000073480	Intermediately specific	2	KIRC, KIRP
14:103262216-103268216	Intermediately specific	5	PAAD, KIRC, KIRP, KICH, OV
ENSR00000134204	Intermediately specific	2	KIRC, KIRP
ENSR00000197722	Intermediately specific	8	UVM, THCA, MESO, CHOL, KIRC, KIRP, TGCT, SKCM
ENSR00000142755	Intermediately specific	3	KIRC, KIRP, KICH
ENSR00000300538	Intermediately specific	3	KIRC, KIRP, KICH
ENSR00000268663	Intermediately specific	5	UVM, KIRC, KIRP, TGCT, SKCM
ENSR00000027602	Intermediately specific	2	DLBC, KIRP
2:104841681-104847681	Intermediately specific	5	GBM, LGG, KIRC, KIRP, KICH
ENSR00000262889	Intermediately specific	3	KIRC, KIRP, KICH
ENSR00000290305	Intermediately specific	2	KIRC, KIRP
ENSR00000095372	Intermediately specific	4	STAD, KIRP, KICH, CRC
ENSR00000058381	Intermediately specific	6	CHOL, STAD, PAAD, KIRC, KIRP, CRC
2:34819739-34825739	Intermediately specific	2	KIRC, KIRP
ENSR00000106947	Intermediately specific	6	LIHC, CHOL, STAD, KIRP, KICH, SKCM
ENSR00000073523	Intermediately specific	3	THYM, KIRP, CESC
ENSR00000156084	Intermediately specific	2	KIRP, UCEC
ENSR00000324968	Intermediately specific	3	KIRC, KIRP, BLCA
ENSR00000287381	Intermediately specific	6	LIHC, CHOL, STAD, KIRP, KICH, SKCM
ENSR00000124833	Intermediately specific	3	KIRC, KIRP, KICH
ENSR00000042914	Intermediately specific	2	KIRC, KIRP
ENSR00000324722	Intermediately specific	3	KIRC, KIRP, CRC
ENSR00000025833	Intermediately specific	3	KIRC, KIRP, ACC
ENSR00000208287	Intermediately specific	3	KIRC, KIRP, CRC
ENSR00000209780	Intermediately specific	2	CHOL, KIRP
ENSR00000210424	Intermediately specific	2	CHOL, KIRP
ENSR00000073756	Intermediately specific	7	LUAD, BRCA, KIRC, KIRP, KICH, UCEC, OV
3:65017582-65023582	Intermediately specific	2	KIRC, KIRP
9:38071611-38077611	Intermediately specific	3	MESO, KIRP, KICH
ENSR00000106419	Intermediately specific	2	STAD, KIRP
ENSR00000265192	Intermediately specific	2	KIRC, KIRP
ENSR00000290306	Intermediately specific	2	KIRC, KIRP
ENSR00000183522	Intermediately specific	2	KIRP, SARC
1:48070869-48076869	Intermediately specific	2	KIRC, KIRP
ENSR00000216139	Intermediately specific	2	KIRP, OV
2:34684326-34690326	Intermediately specific	2	KIRC, KIRP
1:48071372-48077372	Intermediately specific	2	KIRC, KIRP
7:125636722-125642722	Intermediately specific	2	KIRC, KIRP
ENSR00000081679	Intermediately specific	2	KIRC, KIRP
ENSR00000085066	Intermediately specific	2	KIRP, ACC
ENSR00000119894	Intermediately specific	5	THCA, KIRC, KIRP, KICH, OV
3:65057104-65063104	Intermediately specific	3	PCPG, KIRC, KIRP
ENSR00000094549	Intermediately specific	2	KIRC, KIRP
ENSR00000024872	Intermediately specific	2	KIRC, KIRP
14:105041942-105047942	Intermediately specific	5	LUAD, BRCA, KIRP, UCEC, OV
ENSR00000153777	Intermediately specific	2	KIRC, KIRP
ENSR00000314431	Intermediately specific	2	KIRC, KIRP
ENSR00000322370	Intermediately specific	2	KIRC, KIRP
ENSR00000206273	Intermediately specific	3	CHOL, KIRC, KIRP
ENSR00000313257	Intermediately specific	2	KIRP, SARC
ENSR00000127443	Intermediately specific	7	LGG, PCPG, THCA, THYM, KIRP, UCS, TGCT
ENSR00000131868	Intermediately specific	2	THYM, KIRP
ENSR00000215773	Intermediately specific	3	THYM, KIRP, OV
2:104844124-104850124	Intermediately specific	3	LGG, KIRC, KIRP
ENSR00000262893	Intermediately specific	7	HNSC, THYM, BRCA, KIRP, BLCA, CESC, OV
ENSR00000206272	Intermediately specific	2	KIRC, KIRP
21:15888956-15894956	Intermediately specific	2	KIRP, OV
ENSR00000038064	Intermediately specific	4	GBM, LGG, KIRP, SARC
ENSR00000077096	Intermediately specific	3	KIRC, KIRP, KICH
ENSR00000106420	Intermediately specific	2	STAD, KIRP
ENSR00000176518	Intermediately specific	2	KIRP, SARC
ENSR00000036711	Intermediately specific	3	KIRC, KIRP, KICH
ENSR00000287166	Intermediately specific	2	STAD, KIRP
ENSR00000315550	Intermediately specific	2	KIRC, KIRP
ENSR00000014201	Intermediately specific	2	GBM, LGG
1:156433258-156439258	Intermediately specific	2	GBM, LGG
ENSR00000014202	Intermediately specific	2	GBM, LGG
ENSR00000070542	Intermediately specific	3	GBM, LGG, PCPG
ENSR00000070541	Intermediately specific	3	GBM, LGG, PCPG
ENSR00000261762	Intermediately specific	3	GBM, LGG, DLBC
ENSR00000278923	Intermediately specific	2	GBM, LGG
ENSR00000049475	Intermediately specific	4	GBM, LGG, PCPG, STAD
ENSR00000097931	Intermediately specific	3	GBM, LGG, SKCM
ENSR00000001267	Intermediately specific	4	GBM, LGG, STAD, OV
ENSR00000097930	Intermediately specific	3	GBM, LGG, SKCM
ENSR00000097929	Intermediately specific	3	GBM, LGG, SKCM
ENSR00000283518	Intermediately specific	3	GBM, LGG, PCPG
ENSR00000029658	Intermediately specific	2	GBM, LGG
ENSR00000029657	Intermediately specific	2	GBM, LGG
ENSR00000029659	Intermediately specific	2	GBM, LGG
20:47798913-47804913	Intermediately specific	3	GBM, LGG, HNSC
ENSR00000065722	Intermediately specific	5	GBM, LGG, CHOL, KICH, ACC
ENSR00000029656	Intermediately specific	2	GBM, LGG
ENSR00000254582	Intermediately specific	3	LGG, LIHC, BLCA
ENSR00000013955	Intermediately specific	3	LGG, LIHC, BLCA
ENSR00000133614	Intermediately specific	3	GBM, LGG, KIRC
ENSR00000275151	Intermediately specific	4	LGG, PCPG, THYM, TGCT
ENSR00000082561	Intermediately specific	6	GBM, LGG, PCPG, KIRP, KICH, ACC
ENSR00000020734	Intermediately specific	2	LGG, PCPG
ENSR00000266391	Intermediately specific	3	GBM, LGG, THYM
ENSR00000270299	Intermediately specific	7	GBM, LGG, UVM, LUSC, ACC, TGCT, SKCM
ENSR00000263611	Intermediately specific	3	GBM, LGG, CRC
ENSR00000258044	Intermediately specific	2	LGG, CHOL
ENSR00000039712	Intermediately specific	2	GBM, LGG
ENSR00000035665	Intermediately specific	4	LGG, LUSC, KIRP, OV
ENSR00000262475	Intermediately specific	2	GBM, LGG
ENSR00000089540	Intermediately specific	4	GBM, LGG, THYM, KIRP
ENSR00000288182	Intermediately specific	2	GBM, LGG
ENSR00000039047	Intermediately specific	2	LGG, CRC
ENSR00000015172	Intermediately specific	2	GBM, LGG
ENSR00000250237	Intermediately specific	2	LGG, MESO
ENSR00000001413	Intermediately specific	2	LGG, MESO
ENSR00000005093	Intermediately specific	2	LGG, PCPG
ENSR00000138076	Intermediately specific	2	LGG, UCS
11:124075681-124081681	Intermediately specific	2	LGG, PCPG
ENSR00000074028	Intermediately specific	2	LGG, THYM
ENSR00000068707	Intermediately specific	3	LGG, KIRC, KICH
ENSR00000035881	Intermediately specific	2	LGG, OV
ENSR00000087140	Intermediately specific	5	GBM, LGG, DLBC, THYM, CHOL
11:124074787-124080787	Intermediately specific	2	LGG, PCPG
ENSR00000021065	Intermediately specific	2	LGG, THYM
ENSR00000105480	Intermediately specific	2	LGG, PCPG
ENSR00000138077	Intermediately specific	2	LGG, UCS
ENSR00000075445	Intermediately specific	3	LGG, THYM, TGCT
ENSR00000135287	Intermediately specific	2	LGG, SARC
ENSR00000297595	Intermediately specific	2	LGG, SARC
ENSR00000080922	Intermediately specific	2	LGG, DLBC
ENSR00000051102	Intermediately specific	2	GBM, LGG
ENSR00000268234	Intermediately specific	2	LGG, ACC
ENSR00000288373	Intermediately specific	4	LGG, PCPG, CHOL, UCS
ENSR00000094844	Intermediately specific	2	LGG, PCPG
ENSR00000262334	Intermediately specific	3	LGG, THYM, CHOL
12:49281683-49287683	Intermediately specific	3	GBM, LGG, PCPG
ENSR00000079418	Intermediately specific	2	LGG, TGCT
ENSR00000278768	Intermediately specific	2	LGG, MESO
ENSR00000103163	Intermediately specific	2	LGG, KICH
ENSR00000257991	Intermediately specific	2	LIHC, CHOL
ENSR00000048586	Intermediately specific	2	LIHC, TGCT
ENSR00000221593	Intermediately specific	2	LIHC, CHOL
ENSR00000015371	Intermediately specific	2	LIHC, CHOL
8:119109483-119115483	Intermediately specific	3	LIHC, CHOL, KIRP
ENSR00000320951	Intermediately specific	3	LIHC, CHOL, ACC
ENSR00000229378	Intermediately specific	3	LIHC, CHOL, KIRP
ENSR00000076776	Intermediately specific	6	LUSC, LIHC, CHOL, STAD, CESC, TGCT
ENSR00000267479	Intermediately specific	2	LIHC, CHOL
16:85841944-85847944	Intermediately specific	2	LIHC, CHOL
ENSR00000254829	Intermediately specific	2	LIHC, CHOL
ENSR00000227636	Intermediately specific	3	LIHC, CHOL, PAAD
11:2202068-2208068	Intermediately specific	4	LIHC, STAD, UCEC, CRC
ENSR00000113889	Intermediately specific	3	MESO, LIHC, KIRC
ENSR00000296587	Intermediately specific	2	LIHC, KIRC
ENSR00000012260	Intermediately specific	3	LUSC, LIHC, CHOL
ENSR00000301874	Intermediately specific	3	LIHC, KIRC, KIRP
ENSR00000251054	Intermediately specific	8	LUAD, BRCA, LIHC, CHOL, STAD, KIRP, KICH, BLCA
ENSR00000232010	Intermediately specific	4	LIHC, ACC, UCS, UCEC
21:43433470-43439470	Intermediately specific	4	DLBC, LUAD, LIHC, BLCA
ENSR00000061052	Intermediately specific	2	DLBC, LIHC
ENSR00000270757	Intermediately specific	2	LIHC, TGCT
ENSR00000074315	Intermediately specific	3	LIHC, CHOL, OV
ENSR00000008784	Intermediately specific	2	LUAD, LIHC
ENSR00000176113	Intermediately specific	3	LIHC, KIRC, KIRP
ENSR00000121287	Intermediately specific	2	LIHC, CHOL
ENSR00000146178	Intermediately specific	2	LIHC, KIRP
ENSR00000058382	Intermediately specific	7	LIHC, CHOL, STAD, PAAD, KIRC, KIRP, CRC
ENSR00000137914	Intermediately specific	3	DLBC, LIHC, CHOL
ENSR00000059233	Intermediately specific	2	LIHC, TGCT
11:61994097-62000097	Intermediately specific	2	LIHC, CHOL
ENSR00000067643	Intermediately specific	2	LIHC, PRAD
ENSR00000074316	Intermediately specific	2	LIHC, CHOL
ENSR00000333081	Intermediately specific	3	LIHC, CHOL, KIRP
ENSR00000146179	Intermediately specific	2	LIHC, KIRP
ENSR00000313729	Intermediately specific	2	LUAD, KIRC
5:1559805-1565805	Intermediately specific	2	LUAD, KIRC
ENSR00000324955	Intermediately specific	2	LUAD, BLCA
ENSR00000020566	Intermediately specific	3	LUAD, PAAD, OV
ENSR00000020565	Intermediately specific	2	LUAD, PAAD
ENSR00000324954	Intermediately specific	2	LUAD, BLCA
ENSR00000022209	Intermediately specific	7	HNSC, LUAD, LUSC, BRCA, LIHC, CHOL, CESC
ENSR00000208879	Intermediately specific	2	LUAD, BLCA
ENSR00000312675	Intermediately specific	2	LUAD, KIRC
ENSR00000208930	Intermediately specific	2	LUAD, BLCA
ENSR00000102958	Intermediately specific	2	LUAD, MESO
ENSR00000251622	Intermediately specific	4	LUAD, BRCA, BLCA, OV
ENSR00000251623	Intermediately specific	4	LUAD, BRCA, BLCA, OV
ENSR00000230655	Intermediately specific	2	DLBC, LUAD
ENSR00000220801	Intermediately specific	2	LUAD, TGCT
8:128611061-128617061	Intermediately specific	2	LUAD, TGCT
ENSR00000179800	Intermediately specific	2	LUAD, KIRC
ENSR00000045674	Intermediately specific	2	LUAD, TGCT
ENSR00000161710	Intermediately specific	8	GBM, LGG, THYM, LUAD, STAD, KIRP, UCS, SKCM
ENSR00000121631	Intermediately specific	3	LUAD, CHOL, STAD
ENSR00000045673	Intermediately specific	2	LUAD, TGCT
ENSR00000177510	Intermediately specific	2	LUAD, CHOL
ENSR00000212833	Intermediately specific	7	HNSC, THYM, LUAD, LUSC, BRCA, BLCA, TGCT
ENSR00000314581	Intermediately specific	2	LUAD, KIRC
ENSR00000179801	Intermediately specific	2	LUAD, KIRC
ENSR00000087542	Intermediately specific	3	LUAD, KIRC, TGCT
ENSR00000114467	Intermediately specific	2	LUAD, CHOL
ENSR00000307659	Intermediately specific	2	LUAD, MESO
ENSR00000162382	Intermediately specific	3	LUAD, STAD, SARC
ENSR00000162366	Intermediately specific	2	LUAD, MESO
ENSR00000333895	Intermediately specific	5	LGG, LUAD, MESO, BRCA, PAAD
ENSR00000022018	Intermediately specific	3	LUAD, STAD, PAAD
ENSR00000336447	Intermediately specific	7	UVM, LUAD, CHOL, KIRC, KICH, UCEC, OV
ENSR00000025090	Intermediately specific	2	LUAD, CHOL
ENSR00000021608	Intermediately specific	5	HNSC, LUSC, STAD, CESC, CRC
ENSR00000314722	Intermediately specific	4	HNSC, LUSC, CESC, TGCT
ENSR00000286047	Intermediately specific	3	HNSC, LUSC, CESC
ENSR00000119272	Intermediately specific	4	LUAD, LUSC, BRCA, CHOL
ENSR00000258386	Intermediately specific	8	HNSC, LUSC, STAD, PAAD, BLCA, CESC, TGCT, CRC
ENSR00000127899	Intermediately specific	2	HNSC, LUSC
ENSR00000336429	Intermediately specific	3	HNSC, LUSC, CESC
ENSR00000315700	Intermediately specific	4	HNSC, LUSC, CESC, TGCT
ENSR00000127900	Intermediately specific	2	HNSC, LUSC
ENSR00000273819	Intermediately specific	3	HNSC, LUSC, SKCM
ENSR00000264247	Intermediately specific	9	HNSC, DLBC, LUAD, LUSC, CESC, UCS, UCEC, OV, TGCT
ENSR00000145621	Intermediately specific	4	HNSC, LUSC, BLCA, CESC
ENSR00000137004	Intermediately specific	5	HNSC, LUSC, STAD, CESC, TGCT
ENSR00000204526	Intermediately specific	2	LUSC, BLCA
8:129687233-129693233	Intermediately specific	3	LUSC, BLCA, CESC
ENSR00000002741	Intermediately specific	3	HNSC, LUSC, CESC
ENSR00000230875	Intermediately specific	4	HNSC, LUSC, BLCA, CESC
ENSR00000106385	Intermediately specific	4	HNSC, LUSC, CESC, TGCT
ENSR00000148096	Intermediately specific	2	HNSC, LUSC
ENSR00000230874	Intermediately specific	4	HNSC, LUSC, BLCA, CESC
ENSR00000287159	Intermediately specific	4	HNSC, LUSC, CESC, TGCT
ENSR00000022210	Intermediately specific	8	HNSC, LUAD, LUSC, BRCA, LIHC, CHOL, BLCA, CESC
ENSR00000230876	Intermediately specific	3	HNSC, LUSC, CESC
ENSR00000301581	Intermediately specific	3	HNSC, LUSC, TGCT
ENSR00000145128	Intermediately specific	3	HNSC, LUSC, TGCT
ENSR00000288311	Intermediately specific	8	HNSC, DLBC, LUSC, CESC, UCS, UCEC, OV, TGCT
17:79754225-79760225	Intermediately specific	4	LUAD, LUSC, BRCA, LIHC
ENSR00000336428	Intermediately specific	3	HNSC, LUSC, CESC
ENSR00000237312	Intermediately specific	3	HNSC, LUSC, CESC
ENSR00000109335	Intermediately specific	8	HNSC, DLBC, LUSC, CESC, UCS, UCEC, OV, TGCT
ENSR00000273820	Intermediately specific	3	HNSC, LUSC, SKCM
ENSR00000145127	Intermediately specific	3	HNSC, LUSC, TGCT
ENSR00000334980	Intermediately specific	3	HNSC, LUSC, TGCT
ENSR00000239058	Intermediately specific	2	HNSC, LUSC
ENSR00000207995	Intermediately specific	3	HNSC, LUSC, CESC
ENSR00000272484	Intermediately specific	2	LUSC, CESC
ENSR00000278894	Intermediately specific	3	HNSC, LUSC, CESC
ENSR00000318752	Intermediately specific	3	HNSC, LUSC, CESC
ENSR00000081902	Intermediately specific	3	HNSC, LUSC, CESC
ENSR00000204527	Intermediately specific	2	LUSC, BLCA
ENSR00000323536	Intermediately specific	2	LUSC, BLCA
ENSR00000132250	Intermediately specific	2	THYM, LUSC
ENSR00000132251	Intermediately specific	2	THYM, LUSC
ENSR00000254407	Intermediately specific	4	HNSC, LUSC, CESC, TGCT
ENSR00000316674	Intermediately specific	4	DLBC, LUAD, LUSC, TGCT
ENSR00000170498	Intermediately specific	2	THYM, LUSC
ENSR00000310910	Intermediately specific	2	THYM, LUSC
2:81479193-81485193	Intermediately specific	2	LUSC, SKCM
ENSR00000157924	Intermediately specific	2	LUSC, CESC
ENSR00000162720	Intermediately specific	2	HNSC, LUSC
ENSR00000291739	Intermediately specific	2	LUSC, SKCM
ENSR00000239057	Intermediately specific	2	HNSC, LUSC
ENSR00000321885	Intermediately specific	2	HNSC, LUSC
ENSR00000051396	Intermediately specific	5	HNSC, DLBC, LUSC, BLCA, CESC
4:87539080-87545080	Intermediately specific	2	THYM, LUSC
8:127663501-127669501	Intermediately specific	2	HNSC, LUSC
ENSR00000080840	Intermediately specific	3	HNSC, LUSC, CESC
ENSR00000112643	Intermediately specific	4	HNSC, LUSC, BLCA, CESC
ENSR00000278895	Intermediately specific	2	HNSC, LUSC
ENSR00000313345	Intermediately specific	3	HNSC, LUSC, CESC
ENSR00000337905	Intermediately specific	3	HNSC, LUSC, CESC
ENSR00000307922	Intermediately specific	7	HNSC, LUSC, MESO, CESC, UCS, TGCT, SARC
ENSR00000226021	Intermediately specific	2	LUSC, TGCT
ENSR00000230877	Intermediately specific	3	HNSC, LUSC, CESC
ENSR00000288416	Intermediately specific	2	LUSC, CESC
ENSR00000157923	Intermediately specific	2	LUSC, CESC
ENSR00000264832	Intermediately specific	2	HNSC, LUSC
ENSR00000142607	Intermediately specific	3	HNSC, LUSC, CESC
ENSR00000208877	Intermediately specific	5	LUAD, LUSC, BRCA, PAAD, BLCA
7:17052139-17058139	Intermediately specific	5	LUAD, LUSC, BRCA, PAAD, BLCA
ENSR00000185310	Intermediately specific	4	DLBC, LUAD, LUSC, TGCT
ENSR00000323635	Intermediately specific	6	HNSC, LUSC, CESC, UCS, OV, TGCT
ENSR00000323636	Intermediately specific	6	HNSC, LUSC, CESC, UCS, OV, TGCT
ENSR00000204783	Intermediately specific	6	HNSC, LUSC, CESC, UCS, OV, TGCT
ENSR00000230878	Intermediately specific	3	HNSC, LUSC, CESC
ENSR00000219736	Intermediately specific	4	DLBC, LUSC, LIHC, SARC
ENSR00000325110	Intermediately specific	3	LUAD, LUSC, CHOL
ENSR00000051397	Intermediately specific	3	DLBC, LUSC, BLCA
ENSR00000208876	Intermediately specific	5	LUAD, LUSC, BRCA, PAAD, BLCA
ENSR00000209329	Intermediately specific	3	LUAD, LUSC, CHOL
ENSR00000023751	Intermediately specific	2	LUSC, CHOL
ENSR00000139708	Intermediately specific	4	HNSC, THYM, LUSC, CESC
ENSR00000251352	Intermediately specific	3	HNSC, LUSC, TGCT
20:45237957-45243957	Intermediately specific	9	LUAD, LUSC, MESO, CHOL, PAAD, KIRP, CESC, UCEC, OV
ENSR00000044702	Intermediately specific	5	PCPG, THYM, MESO, UCEC, TGCT
ENSR00000044703	Intermediately specific	5	PCPG, THYM, MESO, UCEC, TGCT
3:112422336-112428336	Intermediately specific	2	OV, TGCT
ENSR00000166500	Intermediately specific	2	UCEC, OV
13:22878861-22884861	Intermediately specific	4	KIRC, KIRP, UCEC, OV
ENSR00000021441	Intermediately specific	2	OV, TGCT
14:105033430-105039430	Intermediately specific	9	LUAD, BRCA, PAAD, KIRC, KIRP, KICH, CESC, UCEC, OV
ENSR00000232313	Intermediately specific	4	ACC, UCEC, OV, CRC
ENSR00000334027	Intermediately specific	4	ACC, UCEC, OV, CRC
ENSR00000013524	Intermediately specific	7	GBM, LGG, LUAD, BRCA, CHOL, STAD, OV
ENSR00000334026	Intermediately specific	6	MESO, ACC, UCS, UCEC, OV, CRC
ENSR00000003132	Intermediately specific	4	HNSC, CESC, OV, TGCT
ENSR00000250751	Intermediately specific	4	HNSC, CESC, OV, TGCT
8:114692380-114698380	Intermediately specific	2	STAD, OV
ENSR00000031055	Intermediately specific	5	LUAD, BRCA, STAD, KIRC, OV
ENSR00000237390	Intermediately specific	4	CHOL, KIRC, KIRP, OV
ENSR00000237389	Intermediately specific	4	CHOL, KIRC, KIRP, OV
ENSR00000165133	Intermediately specific	2	KIRC, OV
9:88522829-88528829	Intermediately specific	2	KIRP, OV
ENSR00000227915	Intermediately specific	4	DLBC, LUAD, LUSC, OV
ENSR00000237388	Intermediately specific	3	KIRC, KIRP, OV
ENSR00000140167	Intermediately specific	4	DLBC, UCS, UCEC, OV
6:44099909-44105909	Intermediately specific	3	LGG, LUAD, OV
ENSR00000018794	Intermediately specific	4	MESO, KIRC, KIRP, OV
ENSR00000260353	Intermediately specific	3	UCS, OV, SARC
ENSR00000218048	Intermediately specific	3	LUAD, STAD, OV
ENSR00000218049	Intermediately specific	3	LUAD, STAD, OV
ENSR00000012851	Intermediately specific	7	THCA, LUAD, BRCA, CHOL, STAD, PAAD, OV
ENSR00000333793	Intermediately specific	3	GBM, LGG, OV
ENSR00000333794	Intermediately specific	3	GBM, LGG, OV
ENSR00000288414	Intermediately specific	5	HNSC, LUAD, LUSC, CESC, OV
ENSR00000288415	Intermediately specific	5	HNSC, LUAD, LUSC, CESC, OV
ENSR00000292862	Intermediately specific	2	UCEC, OV
ENSR00000294778	Intermediately specific	6	LUAD, BRCA, STAD, BLCA, CESC, OV
ENSR00000330458	Intermediately specific	2	LGG, OV
ENSR00000021389	Intermediately specific	3	MESO, OV, TGCT
ENSR00000267210	Intermediately specific	3	THYM, BRCA, OV
ENSR00000048866	Intermediately specific	3	THYM, BRCA, OV
ENSR00000292865	Intermediately specific	3	CHOL, KICH, OV
ENSR00000121597	Intermediately specific	3	CHOL, KICH, OV
ENSR00000085065	Intermediately specific	5	MESO, CHOL, KIRP, ACC, OV
ENSR00000254548	Intermediately specific	5	HNSC, LUSC, CESC, OV, TGCT
ENSR00000256852	Intermediately specific	2	LUAD, OV
ENSR00000018795	Intermediately specific	2	KIRC, OV
ENSR00000049474	Intermediately specific	5	GBM, LGG, PCPG, STAD, OV
ENSR00000256318	Intermediately specific	2	KIRC, OV
ENSR00000298024	Intermediately specific	4	LGG, LUAD, STAD, OV
ENSR00000164112	Intermediately specific	3	CHOL, KIRC, OV
ENSR00000165167	Intermediately specific	3	MESO, OV, TGCT
ENSR00000101971	Intermediately specific	3	LIHC, CHOL, PAAD
ENSR00000324962	Intermediately specific	6	LUAD, LUSC, CHOL, PAAD, KIRP, BLCA
ENSR00000208921	Intermediately specific	5	LUAD, CHOL, PAAD, KIRP, BLCA
ENSR00000305834	Intermediately specific	4	PAAD, KIRC, KIRP, KICH
ENSR00000130831	Intermediately specific	2	CHOL, PAAD
ENSR00000324963	Intermediately specific	5	DLBC, LUAD, PAAD, KIRP, BLCA
ENSR00000130832	Intermediately specific	2	CHOL, PAAD
ENSR00000163984	Intermediately specific	3	PAAD, BLCA, CESC
2:42967803-42973803	Intermediately specific	5	THYM, CHOL, STAD, PAAD, CRC
1:116485310-116491310	Intermediately specific	6	DLBC, CHOL, PAAD, KIRC, KIRP, SKCM
ENSR00000068091	Intermediately specific	9	HNSC, DLBC, THYM, LUAD, BRCA, CHOL, PAAD, BLCA, CESC
ENSR00000280261	Intermediately specific	3	CHOL, PAAD, ACC
ENSR00000322368	Intermediately specific	5	CHOL, PAAD, KIRC, KIRP, KICH
ENSR00000085004	Intermediately specific	3	CHOL, PAAD, ACC
ENSR00000023598	Intermediately specific	2	PAAD, CRC
ENSR00000139318	Intermediately specific	2	CHOL, PAAD
14:105080430-105086430	Intermediately specific	8	LUAD, LUSC, MESO, PAAD, KIRC, KIRP, UCEC, OV
14:50028128-50034128	Intermediately specific	7	HNSC, DLBC, THYM, CHOL, PAAD, BLCA, CESC
6:106758262-106764262	Intermediately specific	5	CHOL, PAAD, KIRC, KIRP, KICH
ENSR00000011926	Intermediately specific	4	DLBC, CHOL, PAAD, SKCM
ENSR00000045241	Intermediately specific	8	LUAD, MESO, LIHC, CHOL, PAAD, KIRC, KIRP, SARC
1:84288834-84294834	Intermediately specific	7	GBM, THCA, PAAD, BLCA, PRAD, SKCM, CRC
ENSR00000311900	Intermediately specific	3	PAAD, KICH, UCS
ENSR00000068090	Intermediately specific	7	HNSC, DLBC, BRCA, CHOL, PAAD, BLCA, CESC
ENSR00000267754	Intermediately specific	2	CHOL, PAAD
ENSR00000050509	Intermediately specific	2	CHOL, PAAD
ENSR00000208925	Intermediately specific	6	LUAD, PAAD, KIRC, KIRP, BLCA, OV
ENSR00000073844	Intermediately specific	6	DLBC, LUAD, LUSC, CHOL, STAD, PAAD
ENSR00000208927	Intermediately specific	3	LUAD, PAAD, BLCA
ENSR00000197260	Intermediately specific	3	PCPG, PAAD, KIRC
ENSR00000057216	Intermediately specific	9	GBM, LGG, PCPG, CHOL, PAAD, KICH, ACC, UCS, SKCM
ENSR00000208926	Intermediately specific	5	LUAD, PAAD, KIRP, BLCA, OV
ENSR00000127898	Intermediately specific	7	HNSC, DLBC, LUAD, LUSC, PAAD, BLCA, CESC
ENSR00000266160	Intermediately specific	3	CHOL, PAAD, CESC
ENSR00000022019	Intermediately specific	2	STAD, PAAD
6:39090413-39096413	Intermediately specific	3	LGG, PAAD, PCPG
ENSR00000261180	Intermediately specific	2	PCPG, ACC
ENSR00000179487	Intermediately specific	2	PCPG, THYM
ENSR00000332547	Intermediately specific	3	GBM, PCPG, SARC
ENSR00000171355	Intermediately specific	4	LGG, PCPG, KIRP, KICH
ENSR00000302313	Intermediately specific	2	LGG, PCPG
ENSR00000230665	Intermediately specific	3	GBM, LGG, PCPG
ENSR00000218289	Intermediately specific	4	GBM, LGG, PCPG, UCS
ENSR00000034147	Intermediately specific	2	LGG, PCPG
ENSR00000138691	Intermediately specific	2	LGG, PCPG
ENSR00000091761	Intermediately specific	9	GBM, LGG, PCPG, UVM, THYM, LIHC, CHOL, KIRP, ACC
ENSR00000166287	Intermediately specific	7	LGG, PCPG, THYM, LUAD, KIRP, ACC, UCS
ENSR00000184971	Intermediately specific	3	PCPG, DLBC, THYM
ENSR00000044715	Intermediately specific	2	PCPG, ACC
ENSR00000099352	Intermediately specific	2	PCPG, UCS
ENSR00000284700	Intermediately specific	2	PCPG, UCS
ENSR00000012532	Intermediately specific	3	GBM, LGG, PCPG
ENSR00000197243	Intermediately specific	4	PCPG, LUAD, CHOL, KIRC
ENSR00000020705	Intermediately specific	8	GBM, LGG, PCPG, MESO, KIRC, ACC, SARC, SKCM
ENSR00000297206	Intermediately specific	2	LGG, PCPG
ENSR00000134056	Intermediately specific	2	LGG, PCPG
ENSR00000170143	Intermediately specific	2	PCPG, TGCT
ENSR00000279461	Intermediately specific	3	LGG, PCPG, ACC
ENSR00000300734	Intermediately specific	4	GBM, LGG, PCPG, SKCM
ENSR00000044716	Intermediately specific	2	PCPG, ACC
ENSR00000012533	Intermediately specific	3	GBM, LGG, PCPG
21:46580904-46586904	Intermediately specific	5	GBM, LGG, PCPG, TGCT, SKCM
ENSR00000012531	Intermediately specific	3	GBM, LGG, PCPG
ENSR00000019757	Intermediately specific	3	LGG, PCPG, KIRC
ENSR00000103786	Intermediately specific	3	PCPG, KICH, PRAD
ENSR00000200932	Intermediately specific	7	GBM, LGG, PCPG, THYM, UCS, TGCT, SARC
ENSR00000174118	Intermediately specific	5	PCPG, THYM, BRCA, CHOL, KIRC
ENSR00000012530	Intermediately specific	3	GBM, LGG, PCPG
11:124072171-124078171	Intermediately specific	2	LGG, PCPG
ENSR00000326566	Intermediately specific	9	GBM, LGG, PCPG, MESO, CHOL, KIRC, KIRP, UCS, OV
ENSR00000186875	Intermediately specific	8	GBM, LGG, PCPG, THYM, MESO, CHOL, KIRC, KIRP
3:65024593-65030593	Intermediately specific	3	PCPG, KIRC, KIRP
ENSR00000297207	Intermediately specific	2	LGG, PCPG
ENSR00000115688	Intermediately specific	9	LGG, PCPG, LUAD, CHOL, STAD, PAAD, KIRC, KIRP, KICH
ENSR00000170142	Intermediately specific	2	PCPG, TGCT
ENSR00000243050	Intermediately specific	2	PCPG, KIRC
ENSR00000211620	Intermediately specific	3	PCPG, KIRP, ACC
ENSR00000039714	Intermediately specific	4	GBM, LGG, PCPG, CHOL
ENSR00000059951	Intermediately specific	2	BRCA, PRAD
ENSR00000059950	Intermediately specific	2	BRCA, PRAD
ENSR00000271171	Intermediately specific	2	BRCA, PRAD
13:23712092-23718092	Intermediately specific	2	BRCA, PRAD
14:37582153-37588153	Intermediately specific	2	BRCA, PRAD
ENSR00000067777	Intermediately specific	2	BRCA, PRAD
ENSR00000274167	Intermediately specific	2	BRCA, PRAD
ENSR00000287619	Intermediately specific	2	BRCA, PRAD
ENSR00000287618	Intermediately specific	3	BRCA, BLCA, PRAD
ENSR00000139292	Intermediately specific	5	BRCA, CHOL, PAAD, UCS, PRAD
ENSR00000139291	Intermediately specific	4	BRCA, PAAD, UCS, PRAD
ENSR00000176003	Intermediately specific	4	UVM, CHOL, PRAD, SKCM
ENSR00000027722	Intermediately specific	4	MESO, CHOL, PAAD, PRAD
ENSR00000297873	Intermediately specific	3	BRCA, ACC, PRAD
ENSR00000257439	Intermediately specific	8	HNSC, THYM, LUSC, MESO, BRCA, BLCA, CESC, PRAD
ENSR00000022369	Intermediately specific	8	HNSC, THYM, LUSC, MESO, BRCA, BLCA, CESC, PRAD
ENSR00000022370	Intermediately specific	8	HNSC, THYM, LUSC, MESO, BRCA, BLCA, CESC, PRAD
ENSR00000301799	Intermediately specific	3	GBM, BLCA, PRAD
ENSR00000145813	Intermediately specific	3	GBM, BLCA, PRAD
ENSR00000176008	Intermediately specific	3	UVM, PRAD, SKCM
ENSR00000145812	Intermediately specific	3	GBM, BLCA, PRAD
ENSR00000022371	Intermediately specific	8	HNSC, THYM, LUSC, MESO, BRCA, BLCA, CESC, PRAD
19:15632599-15638599	Intermediately specific	2	BLCA, PRAD
1:203425583-203431583	Intermediately specific	3	STAD, PRAD, CRC
ENSR00000300270	Intermediately specific	2	LGG, PRAD
ENSR00000141981	Intermediately specific	2	LGG, PRAD
ENSR00000059501	Intermediately specific	4	THYM, UCS, PRAD, TGCT
ENSR00000189128	Intermediately specific	5	LGG, PCPG, THYM, KIRC, PRAD
ENSR00000059502	Intermediately specific	4	THYM, UCS, PRAD, TGCT
3:128432166-128438166	Intermediately specific	2	KICH, PRAD
ENSR00000135812	Intermediately specific	2	ACC, PRAD
ENSR00000160107	Intermediately specific	2	KICH, PRAD
ENSR00000307660	Intermediately specific	7	LUAD, MESO, BRCA, STAD, PAAD, PRAD, SARC
ENSR00000332607	Intermediately specific	2	BLCA, PRAD
ENSR00000228089	Intermediately specific	4	BRCA, BLCA, CESC, PRAD
ENSR00000139303	Intermediately specific	2	CHOL, PRAD
ENSR00000177511	Intermediately specific	7	LUAD, BRCA, CHOL, PAAD, KICH, PRAD, CRC
ENSR00000323341	Intermediately specific	2	PCPG, PRAD
ENSR00000333965	Intermediately specific	7	HNSC, LUAD, LUSC, BRCA, BLCA, CESC, PRAD
ENSR00000333966	Intermediately specific	7	HNSC, LUAD, LUSC, BRCA, BLCA, CESC, PRAD
ENSR00000188680	Intermediately specific	2	LUAD, PRAD
ENSR00000177512	Intermediately specific	6	LUAD, BRCA, CHOL, KICH, PRAD, CRC
5:1126904-1132904	Intermediately specific	6	LUAD, BRCA, CHOL, KICH, PRAD, CRC
ENSR00000253602	Intermediately specific	5	GBM, LGG, PAAD, PRAD, SARC
ENSR00000158099	Intermediately specific	2	KICH, PRAD
ENSR00000256319	Intermediately specific	5	LUAD, KIRC, KIRP, KICH, PRAD
ENSR00000176006	Intermediately specific	2	UVM, PRAD
1:205554617-205560617	Intermediately specific	5	LUAD, KIRC, KIRP, KICH, PRAD
9:85856735-85862735	Intermediately specific	2	PRAD, TGCT
ENSR00000334029	Intermediately specific	2	OV, PRAD
ENSR00000297874	Intermediately specific	2	ACC, PRAD
ENSR00000334030	Intermediately specific	2	OV, PRAD
ENSR00000008301	Intermediately specific	8	GBM, LGG, STAD, PAAD, KIRC, UCS, PRAD, SARC
ENSR00000279969	Intermediately specific	3	BRCA, PAAD, PRAD
ENSR00000338058	Intermediately specific	5	LGG, THYM, UCEC, PRAD, SARC
ENSR00000306107	Intermediately specific	3	KICH, UCEC, PRAD
ENSR00000252382	Intermediately specific	6	GBM, LGG, STAD, UCS, PRAD, SARC
ENSR00000160108	Intermediately specific	2	KICH, PRAD
ENSR00000330781	Intermediately specific	2	KICH, PRAD
ENSR00000132910	Intermediately specific	4	MESO, UCS, PRAD, SARC
ENSR00000225381	Intermediately specific	5	LGG, LIHC, KIRP, KICH, PRAD
ENSR00000231303	Intermediately specific	8	HNSC, LUSC, LIHC, KIRC, KIRP, KICH, CESC, PRAD
ENSR00000095759	Intermediately specific	5	DLBC, LIHC, CHOL, KICH, PRAD
ENSR00000099563	Intermediately specific	7	GBM, LGG, THYM, CHOL, KIRP, UCS, PRAD
ENSR00000329627	Intermediately specific	6	GBM, LGG, THYM, KIRP, KICH, PRAD
ENSR00000084237	Intermediately specific	2	PAAD, PRAD
ENSR00000175061	Intermediately specific	8	THCA, THYM, MESO, KIRC, KIRP, KICH, UCEC, PRAD
ENSR00000291402	Intermediately specific	2	PCPG, PRAD
ENSR00000253688	Intermediately specific	6	THYM, BRCA, CESC, UCS, PRAD, TGCT
ENSR00000286026	Intermediately specific	7	GBM, LGG, PCPG, THYM, KICH, PRAD, SARC
ENSR00000277219	Intermediately specific	4	LGG, THYM, PRAD, TGCT
ENSR00000296966	Intermediately specific	3	THYM, BRCA, PRAD
ENSR00000095760	Intermediately specific	4	DLBC, LIHC, CHOL, PRAD
ENSR00000336852	Intermediately specific	4	LGG, PCPG, KICH, PRAD
ENSR00000300367	Intermediately specific	2	LUAD, SARC
ENSR00000183473	Intermediately specific	7	LGG, MESO, PAAD, KIRC, KIRP, UCS, SARC
ENSR00000142306	Intermediately specific	2	LUAD, SARC
ENSR00000300368	Intermediately specific	2	LUAD, SARC
12:70234133-70240133	Intermediately specific	2	GBM, SARC
ENSR00000116102	Intermediately specific	3	HNSC, BLCA, SARC
ENSR00000116103	Intermediately specific	3	HNSC, BLCA, SARC
ENSR00000305868	Intermediately specific	2	KIRC, SARC
ENSR00000142305	Intermediately specific	2	LUAD, SARC
ENSR00000329453	Intermediately specific	4	LGG, PCPG, PRAD, SARC
ENSR00000185567	Intermediately specific	4	PCPG, DLBC, KIRC, SARC
ENSR00000220374	Intermediately specific	4	LGG, PCPG, PRAD, SARC
ENSR00000139416	Intermediately specific	4	GBM, PAAD, SARC, SKCM
ENSR00000286548	Intermediately specific	5	GBM, LGG, PCPG, CHOL, SARC
ENSR00000031585	Intermediately specific	6	LGG, LIHC, KIRC, KICH, BLCA, SARC
ENSR00000316579	Intermediately specific	3	ACC, PRAD, SARC
ENSR00000196948	Intermediately specific	9	GBM, LGG, PCPG, THYM, BRCA, STAD, KIRC, OV, SARC
ENSR00000291915	Intermediately specific	4	THCA, DLBC, KIRC, SARC
ENSR00000111372	Intermediately specific	9	GBM, LGG, PCPG, BRCA, LIHC, KICH, BLCA, PRAD, SARC
2:237105331-237111331	Intermediately specific	5	GBM, THYM, KIRC, KIRP, SARC
ENSR00000092460	Intermediately specific	4	LGG, KICH, UCS, SARC
6:169166523-169172523	Intermediately specific	2	MESO, SARC
ENSR00000303726	Intermediately specific	4	GBM, LGG, BRCA, SARC
ENSR00000164117	Intermediately specific	7	DLBC, MESO, LIHC, CHOL, KIRP, CESC, SARC
ENSR00000321950	Intermediately specific	3	GBM, PRAD, SARC
ENSR00000026485	Intermediately specific	7	PCPG, UVM, DLBC, MESO, PRAD, TGCT, SARC
ENSR00000324129	Intermediately specific	8	GBM, LGG, LUAD, MESO, BRCA, PRAD, SARC, SKCM
ENSR00000316580	Intermediately specific	3	ACC, PRAD, SARC
20:47797781-47803781	Intermediately specific	4	GBM, LGG, HNSC, SARC
ENSR00000322570	Intermediately specific	2	UCS, SARC
ENSR00000238779	Intermediately specific	3	PCPG, PAAD, SARC
ENSR00000005095	Intermediately specific	8	GBM, LGG, PCPG, THCA, LUAD, UCS, SARC, SKCM
ENSR00000079432	Intermediately specific	6	GBM, LGG, MESO, KIRC, SARC, SKCM
ENSR00000251340	Intermediately specific	8	GBM, LGG, PCPG, THCA, LUAD, UCS, SARC, SKCM
ENSR00000188682	Intermediately specific	6	LUAD, KIRP, KICH, CESC, PRAD, SARC
ENSR00000116101	Intermediately specific	2	BLCA, SARC
ENSR00000188681	Intermediately specific	6	LUAD, KIRP, KICH, CESC, PRAD, SARC
ENSR00000139415	Intermediately specific	3	PAAD, SARC, SKCM
ENSR00000039713	Intermediately specific	6	GBM, LGG, PCPG, CHOL, KIRP, SARC
ENSR00000263328	Intermediately specific	2	UCS, SARC
ENSR00000026020	Intermediately specific	3	LUSC, CESC, SKCM
ENSR00000043149	Intermediately specific	5	UVM, HNSC, ACC, CESC, SKCM
ENSR00000329983	Intermediately specific	2	UVM, SKCM
ENSR00000279759	Intermediately specific	3	UVM, KICH, SKCM
ENSR00000083666	Intermediately specific	3	UVM, KICH, SKCM
ENSR00000261094	Intermediately specific	3	UVM, LIHC, SKCM
ENSR00000167231	Intermediately specific	3	KIRC, KICH, SKCM
ENSR00000108473	Intermediately specific	2	UVM, SKCM
ENSR00000083665	Intermediately specific	3	UVM, KICH, SKCM
ENSR00000032472	Intermediately specific	3	UVM, LIHC, SKCM
1:68389649-68395649	Intermediately specific	8	LUAD, MESO, STAD, PAAD, BLCA, CESC, SARC, SKCM
ENSR00000053392	Intermediately specific	4	GBM, STAD, UCEC, OV
ENSR00000053394	Intermediately specific	4	GBM, STAD, UCEC, OV
ENSR00000042390	Intermediately specific	5	LUAD, STAD, PAAD, PRAD, CRC
ENSR00000035913	Intermediately specific	7	LUAD, LIHC, STAD, BLCA, CESC, UCEC, CRC
ENSR00000262415	Intermediately specific	7	LUAD, LIHC, STAD, BLCA, CESC, UCEC, CRC
ENSR00000264972	Intermediately specific	5	LUAD, STAD, PAAD, PRAD, CRC
11:67333380-67339380	Intermediately specific	2	STAD, OV
3:193825696-193831696	Intermediately specific	9	HNSC, LUSC, BRCA, CHOL, STAD, PAAD, KIRC, KIRP, KICH
ENSR00000085056	Intermediately specific	5	LUAD, STAD, KIRC, OV, TGCT
6:2296554-2302554	Intermediately specific	2	STAD, OV
ENSR00000308834	Intermediately specific	2	STAD, TGCT
ENSR00000272486	Intermediately specific	4	HNSC, LUSC, STAD, CESC
ENSR00000271434	Intermediately specific	8	HNSC, LUSC, STAD, BLCA, CESC, UCS, OV, TGCT
ENSR00000160285	Intermediately specific	7	LUSC, LIHC, CHOL, STAD, PAAD, BLCA, OV
ENSR00000060694	Intermediately specific	8	HNSC, LUSC, STAD, BLCA, CESC, UCS, OV, TGCT
ENSR00000216277	Intermediately specific	2	STAD, OV
ENSR00000218044	Intermediately specific	2	STAD, OV
ENSR00000223532	Intermediately specific	4	STAD, PAAD, KIRP, CRC
ENSR00000254583	Intermediately specific	9	GBM, LGG, HNSC, LUSC, BRCA, LIHC, STAD, BLCA, CESC
ENSR00000030704	Intermediately specific	4	LUAD, STAD, KIRC, OV
ENSR00000218043	Intermediately specific	2	STAD, OV
5:136546882-136552882	Intermediately specific	2	STAD, BLCA
ENSR00000165802	Intermediately specific	2	STAD, TGCT
17:32396993-32402993	Intermediately specific	3	THYM, LUAD, STAD
ENSR00000216273	Intermediately specific	6	LUAD, BRCA, STAD, KIRC, KIRP, KICH
1:39040959-39046959	Intermediately specific	3	GBM, STAD, OV
ENSR00000049011	Intermediately specific	3	LUAD, STAD, PAAD
19:36154578-36160578	Intermediately specific	8	HNSC, LUSC, STAD, KICH, CESC, UCEC, OV, TGCT
ENSR00000223533	Intermediately specific	2	STAD, CRC
5:147836248-147842248	Intermediately specific	5	LUAD, LIHC, STAD, PAAD, BLCA
1:39040346-39046346	Intermediately specific	3	GBM, STAD, OV
ENSR00000218047	Intermediately specific	3	LUAD, STAD, OV
ENSR00000293651	Intermediately specific	3	GBM, STAD, OV
ENSR00000123200	Intermediately specific	3	GBM, STAD, OV
ENSR00000195012	Intermediately specific	4	BRCA, LIHC, STAD, CESC
ENSR00000216276	Intermediately specific	2	STAD, OV
ENSR00000220683	Intermediately specific	2	STAD, TGCT
1:65041727-65047727	Intermediately specific	2	STAD, OV
8:103391145-103397145	Intermediately specific	2	STAD, SKCM
ENSR00000221181	Intermediately specific	2	STAD, TGCT
ENSR00000329962	Intermediately specific	2	LGG, STAD
ENSR00000137463	Intermediately specific	7	MESO, STAD, KIRC, BLCA, UCS, PRAD, SARC
ENSR00000230497	Intermediately specific	3	LUSC, STAD, CRC
ENSR00000230609	Intermediately specific	3	GBM, STAD, OV
ENSR00000216275	Intermediately specific	2	LUAD, STAD
ENSR00000097963	Intermediately specific	2	STAD, OV
ENSR00000116672	Intermediately specific	3	LGG, STAD, OV
ENSR00000333355	Intermediately specific	3	LUSC, STAD, CRC
ENSR00000230496	Intermediately specific	3	LUSC, STAD, CRC
ENSR00000206898	Intermediately specific	4	BRCA, STAD, KIRC, TGCT
ENSR00000324220	Intermediately specific	4	BRCA, STAD, KIRC, TGCT
ENSR00000230608	Intermediately specific	4	GBM, LGG, STAD, OV
ENSR00000003079	Intermediately specific	2	STAD, OV
ENSR00000294779	Intermediately specific	8	HNSC, THYM, LUAD, LUSC, STAD, BLCA, CESC, OV
ENSR00000216274	Intermediately specific	2	LUAD, STAD
ENSR00000277845	Intermediately specific	6	PCPG, THYM, CHOL, STAD, PAAD, CESC
ENSR00000162381	Intermediately specific	5	LUAD, STAD, PAAD, PRAD, SARC
ENSR00000250738	Intermediately specific	2	STAD, OV
ENSR00000003078	Intermediately specific	2	STAD, OV
ENSR00000201131	Intermediately specific	6	STAD, KIRC, KIRP, UCEC, OV, TGCT
ENSR00000230633	Intermediately specific	2	LUAD, STAD
ENSR00000160286	Intermediately specific	6	LUSC, LIHC, CHOL, STAD, PAAD, BLCA
ENSR00000164079	Intermediately specific	6	HNSC, LUSC, STAD, PAAD, BLCA, CESC
ENSR00000230634	Intermediately specific	3	LUAD, BRCA, STAD
ENSR00000003080	Intermediately specific	2	STAD, OV
ENSR00000041357	Intermediately specific	7	HNSC, THYM, LUSC, STAD, BLCA, CESC, UCS
ENSR00000333353	Intermediately specific	3	LUSC, STAD, CRC
ENSR00000326843	Intermediately specific	3	LUAD, STAD, KIRC
ENSR00000264626	Intermediately specific	6	HNSC, THYM, LUSC, STAD, BLCA, UCS
ENSR00000213505	Intermediately specific	2	STAD, OV
ENSR00000020666	Intermediately specific	3	LUAD, STAD, PAAD
ENSR00000273758	Intermediately specific	9	HNSC, THYM, LUSC, BRCA, LIHC, STAD, ACC, BLCA, CESC
ENSR00000066766	Intermediately specific	9	HNSC, THYM, LUSC, BRCA, LIHC, STAD, ACC, BLCA, CESC
ENSR00000329060	Intermediately specific	8	DLBC, LUAD, LUSC, MESO, LIHC, STAD, PAAD, SARC
ENSR00000138035	Intermediately specific	6	PCPG, HNSC, BRCA, CHOL, STAD, PAAD
ENSR00000165933	Intermediately specific	7	LUAD, CHOL, STAD, PAAD, KIRP, BLCA, CESC
ENSR00000121731	Intermediately specific	2	CHOL, STAD
ENSR00000085010	Intermediately specific	6	STAD, PAAD, KICH, ACC, SARC, SKCM
ENSR00000308163	Intermediately specific	6	HNSC, LUSC, STAD, PAAD, BLCA, CESC
ENSR00000098147	Intermediately specific	2	STAD, PAAD
ENSR00000284420	Intermediately specific	2	STAD, PAAD
ENSR00000093026	Intermediately specific	2	STAD, OV
ENSR00000283037	Intermediately specific	2	STAD, OV
ENSR00000206897	Intermediately specific	2	STAD, TGCT
ENSR00000139311	Intermediately specific	4	BRCA, STAD, PAAD, CRC
ENSR00000138034	Intermediately specific	4	CHOL, STAD, PAAD, KIRP
ENSR00000280226	Intermediately specific	6	LGG, STAD, PAAD, BLCA, UCS, TGCT
ENSR00000192329	Intermediately specific	9	GBM, LGG, CHOL, STAD, PAAD, KIRC, KIRP, UCS, SARC
ENSR00000331878	Intermediately specific	4	DLBC, MESO, STAD, CESC
ENSR00000138033	Intermediately specific	3	CHOL, STAD, PAAD
ENSR00000172846	Intermediately specific	6	LUAD, STAD, PAAD, KICH, UCS, UCEC
ENSR00000138692	Intermediately specific	2	LGG, STAD
ENSR00000110452	Intermediately specific	2	THYM, STAD
ENSR00000226137	Intermediately specific	4	DLBC, MESO, STAD, CESC
ENSR00000310566	Intermediately specific	8	HNSC, LUSC, LIHC, STAD, BLCA, CESC, OV, TGCT
ENSR00000253967	Intermediately specific	4	GBM, LGG, STAD, OV
4:3927051-3933051	Intermediately specific	3	MESO, OV, TGCT
ENSR00000138944	Intermediately specific	2	DLBC, TGCT
ENSR00000298227	Intermediately specific	9	GBM, HNSC, LUSC, BRCA, CHOL, BLCA, CESC, UCS, TGCT
ENSR00000291463	Intermediately specific	2	OV, TGCT
ENSR00000136365	Intermediately specific	9	GBM, HNSC, LUSC, BRCA, CHOL, BLCA, CESC, UCS, TGCT
ENSR00000257014	Intermediately specific	6	HNSC, LUSC, BLCA, CESC, TGCT, SKCM
ENSR00000237249	Intermediately specific	2	MESO, TGCT
ENSR00000291113	Intermediately specific	2	DLBC, TGCT
ENSR00000163249	Intermediately specific	7	HNSC, LUSC, MESO, CESC, UCS, TGCT, SARC
5:134437441-134443441	Intermediately specific	2	PCPG, TGCT
ENSR00000305562	Intermediately specific	2	UVM, TGCT
ENSR00000048149	Intermediately specific	3	UCS, OV, TGCT
ENSR00000143091	Intermediately specific	2	THYM, TGCT
ENSR00000007612	Intermediately specific	2	TGCT, CRC
ENSR00000307868	Intermediately specific	2	UVM, TGCT
ENSR00000289736	Intermediately specific	2	HNSC, TGCT
ENSR00000289737	Intermediately specific	2	HNSC, TGCT
ENSR00000112836	Intermediately specific	2	HNSC, TGCT
ENSR00000103310	Intermediately specific	3	ACC, UCS, TGCT
1:62229902-62235902	Intermediately specific	2	TGCT, CRC
ENSR00000307869	Intermediately specific	2	UVM, TGCT
ENSR00000295959	Intermediately specific	2	HNSC, TGCT
ENSR00000270758	Intermediately specific	2	LIHC, TGCT
ENSR00000333814	Intermediately specific	5	LUAD, STAD, PAAD, TGCT, CRC
ENSR00000307870	Intermediately specific	2	UVM, TGCT
4:260619-266619	Intermediately specific	6	LGG, BRCA, PCPG, OV, TGCT, SARC
ENSR00000324638	Intermediately specific	3	UVM, TGCT, SKCM
ENSR00000048463	Intermediately specific	8	GBM, LUAD, LUSC, KIRC, UCS, OV, TGCT, SARC
ENSR00000307871	Intermediately specific	2	UVM, TGCT
ENSR00000206456	Intermediately specific	2	HNSC, TGCT
ENSR00000324640	Intermediately specific	3	UVM, TGCT, SKCM
ENSR00000136363	Intermediately specific	2	CHOL, TGCT
ENSR00000117572	Intermediately specific	2	DLBC, TGCT
ENSR00000264586	Intermediately specific	2	HNSC, TGCT
ENSR00000048462	Intermediately specific	8	GBM, LUAD, LUSC, KIRC, UCS, OV, TGCT, SARC
ENSR00000264587	Intermediately specific	2	HNSC, TGCT
ENSR00000289735	Intermediately specific	2	HNSC, TGCT
ENSR00000163070	Intermediately specific	2	UVM, TGCT
ENSR00000337957	Intermediately specific	2	HNSC, TGCT
ENSR00000277860	Intermediately specific	2	LUAD, TGCT
ENSR00000048465	Intermediately specific	6	GBM, LUAD, LUSC, KIRC, UCS, TGCT
ENSR00000324639	Intermediately specific	3	UVM, TGCT, SKCM
ENSR00000337993	Intermediately specific	9	LUAD, BRCA, LIHC, CHOL, STAD, PAAD, UCEC, PRAD, TGCT
ENSR00000048464	Intermediately specific	7	GBM, LUAD, LUSC, KIRC, UCS, OV, TGCT
ENSR00000320404	Intermediately specific	4	HNSC, LUSC, CESC, TGCT
ENSR00000320403	Intermediately specific	4	HNSC, LUSC, CESC, TGCT
ENSR00000329963	Intermediately specific	8	GBM, LGG, THYM, LUSC, CHOL, STAD, CESC, TGCT
ENSR00000164479	Intermediately specific	6	LGG, LUSC, BLCA, CESC, TGCT, CRC
ENSR00000066375	Intermediately specific	2	HNSC, TGCT
ENSR00000310929	Intermediately specific	2	KICH, TGCT
ENSR00000164478	Intermediately specific	6	LGG, LUSC, BLCA, CESC, TGCT, CRC
ENSR00000052474	Intermediately specific	3	HNSC, CESC, TGCT
3:101702711-101708711	Intermediately specific	7	LGG, THYM, LUAD, BRCA, PCPG, KIRP, TGCT
ENSR00000136293	Intermediately specific	3	HNSC, CESC, TGCT
ENSR00000308259	Intermediately specific	5	LGG, BLCA, CESC, TGCT, CRC
ENSR00000301957	Intermediately specific	8	HNSC, LUSC, BRCA, KICH, CESC, TGCT, SARC, SKCM
ENSR00000136292	Intermediately specific	3	HNSC, CESC, TGCT
14:100837467-100843467	Intermediately specific	2	PCPG, TGCT
ENSR00000163375	Intermediately specific	9	HNSC, THYM, LUAD, LUSC, STAD, BLCA, UCS, OV, TGCT
ENSR00000007925	Intermediately specific	3	STAD, OV, TGCT
ENSR00000319650	Intermediately specific	3	HNSC, LUSC, TGCT
ENSR00000146806	Intermediately specific	6	HNSC, LUSC, KIRC, KIRP, CESC, TGCT
ENSR00000021066	Intermediately specific	4	THYM, BRCA, CHOL, TGCT
ENSR00000215936	Intermediately specific	3	ACC, PRAD, TGCT
ENSR00000309811	Intermediately specific	4	KIRP, KICH, OV, TGCT
ENSR00000146803	Intermediately specific	6	HNSC, LUSC, KIRC, KIRP, CESC, TGCT
ENSR00000305964	Intermediately specific	2	TGCT, SKCM
1:168559308-168565308	Intermediately specific	4	HNSC, LUSC, BLCA, TGCT
ENSR00000294641	Intermediately specific	3	HNSC, DLBC, TGCT
ENSR00000280777	Intermediately specific	2	HNSC, TGCT
ENSR00000290158	Intermediately specific	2	HNSC, TGCT
ENSR00000274092	Intermediately specific	3	ACC, CESC, TGCT
ENSR00000182805	Intermediately specific	4	HNSC, LUSC, CESC, TGCT
ENSR00000067675	Intermediately specific	3	ACC, CESC, TGCT
ENSR00000126054	Intermediately specific	3	HNSC, DLBC, TGCT
ENSR00000220688	Intermediately specific	6	LGG, HNSC, THYM, BLCA, CESC, TGCT
ENSR00000221182	Intermediately specific	5	GBM, LGG, STAD, OV, TGCT
ENSR00000329755	Intermediately specific	7	LGG, HNSC, THYM, LUSC, BLCA, CESC, TGCT
ENSR00000329062	Intermediately specific	7	DLBC, LUAD, LUSC, LIHC, STAD, TGCT, SARC
ENSR00000329754	Intermediately specific	7	LGG, HNSC, THYM, LUSC, BLCA, CESC, TGCT
ENSR00000094570	Intermediately specific	4	LUSC, MESO, KICH, TGCT
ENSR00000050557	Intermediately specific	2	STAD, TGCT
ENSR00000267779	Intermediately specific	2	STAD, TGCT
ENSR00000283466	Intermediately specific	4	LUSC, MESO, KICH, TGCT
ENSR00000048502	Intermediately specific	3	LGG, UCS, TGCT
ENSR00000094568	Intermediately specific	4	LUSC, MESO, KICH, TGCT
ENSR00000329935	Intermediately specific	2	LGG, TGCT
ENSR00000021507	Intermediately specific	2	STAD, TGCT
ENSR00000085643	Intermediately specific	2	HNSC, TGCT
7:45202193-45208193	Intermediately specific	2	KIRC, TGCT
ENSR00000300580	Intermediately specific	3	DLBC, THYM, TGCT
ENSR00000112112	Intermediately specific	3	HNSC, LUSC, TGCT
ENSR00000111203	Intermediately specific	2	THCA, BLCA
ENSR00000310816	Intermediately specific	2	THCA, LUAD
ENSR00000289014	Intermediately specific	2	THCA, BLCA
ENSR00000131822	Intermediately specific	4	PCPG, THCA, THYM, LUAD
ENSR00000021420	Intermediately specific	2	THCA, OV
ENSR00000119678	Intermediately specific	3	LGG, THCA, SKCM
ENSR00000308793	Intermediately specific	3	THCA, THYM, LUAD
ENSR00000306170	Intermediately specific	6	THCA, THYM, LUAD, LUSC, BRCA, PRAD
ENSR00000158324	Intermediately specific	6	THCA, THYM, LUAD, LUSC, BRCA, PRAD
ENSR00000165782	Intermediately specific	2	THCA, THYM
ENSR00000328875	Intermediately specific	8	HNSC, THCA, LUSC, BRCA, KIRC, KIRP, KICH, TGCT
ENSR00000119647	Intermediately specific	4	LGG, THCA, LUAD, UCS
ENSR00000219466	Intermediately specific	8	HNSC, THCA, LUSC, BRCA, KIRC, KIRP, KICH, TGCT
ENSR00000252734	Intermediately specific	5	THCA, CHOL, PAAD, BLCA, SKCM
ENSR00000021419	Intermediately specific	2	THCA, OV
ENSR00000032851	Intermediately specific	7	LGG, PCPG, THCA, THYM, PAAD, KIRP, BLCA
ENSR00000152399	Intermediately specific	2	THCA, KIRP
ENSR00000106798	Intermediately specific	4	LGG, PCPG, THCA, PRAD
ENSR00000296415	Intermediately specific	3	THCA, THYM, LUAD
ENSR00000111952	Intermediately specific	5	PCPG, THCA, KIRP, ACC, UCS
ENSR00000287803	Intermediately specific	2	THCA, KIRC
ENSR00000320535	Intermediately specific	4	LGG, PCPG, THCA, PAAD
ENSR00000074385	Intermediately specific	6	PCPG, THCA, KIRC, KIRP, KICH, SARC
ENSR00000119895	Intermediately specific	4	THCA, KIRC, KICH, OV
ENSR00000338166	Intermediately specific	2	THCA, LUAD
ENSR00000223871	Intermediately specific	2	LGG, THCA
ENSR00000131823	Intermediately specific	3	THCA, THYM, LUAD
ENSR00000309812	Intermediately specific	9	THCA, DLBC, LUAD, KIRC, KIRP, KICH, OV, PRAD, TGCT
ENSR00000304412	Intermediately specific	4	PCPG, THCA, KIRC, KIRP
ENSR00000085860	Intermediately specific	4	GBM, THCA, KIRP, KICH
ENSR00000152400	Intermediately specific	3	PCPG, THCA, KIRP
ENSR00000111953	Intermediately specific	5	PCPG, THCA, ACC, UCS, SARC
ENSR00000048324	Intermediately specific	4	GBM, LGG, THCA, DLBC
ENSR00000274200	Intermediately specific	8	PCPG, THCA, LUAD, BRCA, PAAD, KIRC, KICH, SARC
ENSR00000281507	Intermediately specific	3	LGG, THCA, KICH
ENSR00000308796	Intermediately specific	2	THCA, KICH
ENSR00000321632	Intermediately specific	7	LGG, PCPG, THCA, CHOL, KIRP, UCS, TGCT
ENSR00000320016	Intermediately specific	5	PCPG, THCA, LUAD, KIRC, TGCT
ENSR00000267050	Intermediately specific	4	THCA, THYM, BLCA, TGCT
ENSR00000074386	Intermediately specific	4	PCPG, THCA, KIRC, KICH
ENSR00000327764	Intermediately specific	2	THCA, TGCT
ENSR00000322582	Intermediately specific	7	UVM, THCA, DLBC, THYM, ACC, UCS, PRAD
ENSR00000061666	Intermediately specific	7	THCA, LUAD, CHOL, STAD, PAAD, KIRC, KICH
ENSR00000313383	Intermediately specific	8	HNSC, THCA, THYM, LUSC, KIRC, KIRP, KICH, CESC
ENSR00000159671	Intermediately specific	4	THCA, MESO, KIRC, KIRP
ENSR00000219465	Intermediately specific	2	THCA, KIRP
ENSR00000282631	Intermediately specific	5	GBM, LGG, PCPG, THCA, PRAD
ENSR00000326440	Intermediately specific	7	GBM, LGG, THCA, UCS, PRAD, TGCT, SARC
ENSR00000067825	Intermediately specific	6	PCPG, THCA, LUAD, BRCA, KIRC, KICH
ENSR00000267049	Intermediately specific	3	THCA, THYM, BLCA
ENSR00000153776	Intermediately specific	3	THCA, KIRC, KIRP
ENSR00000191916	Intermediately specific	6	THCA, CHOL, PAAD, KIRC, KIRP, CESC
ENSR00000119949	Intermediately specific	2	THCA, PRAD
ENSR00000023205	Intermediately specific	2	THCA, OV
ENSR00000023206	Intermediately specific	3	THCA, THYM, MESO
ENSR00000048505	Intermediately specific	3	THCA, THYM, BLCA
ENSR00000153775	Intermediately specific	3	THCA, KIRC, KIRP
ENSR00000253852	Intermediately specific	8	LGG, THCA, LUAD, BRCA, CHOL, STAD, KIRC, KIRP
ENSR00000048341	Intermediately specific	9	GBM, LGG, THCA, BRCA, KIRC, KIRP, KICH, OV, TGCT
1:39047635-39053635	Intermediately specific	7	GBM, THCA, THYM, CHOL, STAD, KIRC, OV
ENSR00000254632	Intermediately specific	7	THCA, DLBC, THYM, LUAD, LUSC, KIRC, TGCT
ENSR00000307119	Intermediately specific	6	LGG, THCA, THYM, LIHC, KICH, CESC
ENSR00000153769	Intermediately specific	4	THCA, KIRC, KIRP, SARC
ENSR00000012441	Intermediately specific	4	THCA, PRAD, TGCT, SKCM
ENSR00000301245	Intermediately specific	4	LGG, THCA, THYM, CHOL
ENSR00000312036	Intermediately specific	4	THCA, KIRP, KICH, ACC
ENSR00000041160	Intermediately specific	4	THCA, THYM, KIRC, KIRP
ENSR00000211928	Intermediately specific	9	LGG, PCPG, THCA, KIRC, KIRP, KICH, ACC, UCEC, CRC
ENSR00000211927	Intermediately specific	9	LGG, PCPG, THCA, KIRC, KIRP, KICH, ACC, UCEC, CRC
ENSR00000288256	Intermediately specific	3	THCA, THYM, TGCT
ENSR00000109127	Intermediately specific	5	GBM, LGG, THCA, UCS, TGCT
ENSR00000020849	Intermediately specific	2	THCA, PRAD
ENSR00000012141	Intermediately specific	5	LGG, THCA, BRCA, KIRC, KIRP
ENSR00000288243	Intermediately specific	5	GBM, LGG, THCA, UCS, TGCT
ENSR00000221178	Intermediately specific	8	LGG, HNSC, THCA, THYM, LUSC, BLCA, CESC, TGCT
ENSR00000243109	Intermediately specific	2	THCA, THYM
ENSR00000140538	Intermediately specific	2	THCA, CESC
ENSR00000296414	Intermediately specific	4	PCPG, THCA, THYM, LUAD
ENSR00000207017	Intermediately specific	2	THYM, CRC
ENSR00000084973	Intermediately specific	4	PCPG, THYM, MESO, TGCT
ENSR00000084974	Intermediately specific	5	PCPG, THYM, LUAD, MESO, TGCT
ENSR00000029624	Intermediately specific	3	HNSC, THYM, TGCT
ENSR00000313583	Intermediately specific	3	THYM, LUSC, UCS
ENSR00000177330	Intermediately specific	3	THYM, LUSC, UCS
ENSR00000329960	Intermediately specific	9	LGG, HNSC, THCA, THYM, LUSC, STAD, BLCA, CESC, TGCT
ENSR00000066551	Intermediately specific	2	THCA, THYM
ENSR00000051997	Intermediately specific	6	THCA, THYM, KIRC, KIRP, KICH, PRAD
ENSR00000262651	Intermediately specific	2	DLBC, THYM
ENSR00000106294	Intermediately specific	3	DLBC, THYM, STAD
ENSR00000051998	Intermediately specific	6	THCA, THYM, KIRC, KIRP, KICH, PRAD
ENSR00000190326	Intermediately specific	4	PCPG, THYM, MESO, SARC
ENSR00000072556	Intermediately specific	9	GBM, LGG, THYM, MESO, BRCA, UCS, PRAD, TGCT, SARC
ENSR00000024489	Intermediately specific	2	THYM, UCS
5:42996597-43002597	Intermediately specific	5	GBM, THYM, PAAD, CESC, SARC
ENSR00000132440	Intermediately specific	4	HNSC, THYM, MESO, TGCT
ENSR00000258015	Intermediately specific	4	THYM, PAAD, BLCA, CESC
ENSR00000332958	Intermediately specific	5	HNSC, THYM, LUSC, BLCA, OV
ENSR00000228886	Intermediately specific	5	HNSC, THYM, LUSC, BLCA, OV
ENSR00000323157	Intermediately specific	2	THYM, LUSC
ENSR00000242934	Intermediately specific	2	THYM, CESC
ENSR00000242933	Intermediately specific	2	THYM, CESC
ENSR00000242932	Intermediately specific	2	THYM, CESC
ENSR00000144141	Intermediately specific	2	THCA, THYM
ENSR00000144140	Intermediately specific	2	THCA, THYM
ENSR00000338049	Intermediately specific	2	THYM, TGCT
ENSR00000242555	Intermediately specific	2	THYM, TGCT
ENSR00000336846	Intermediately specific	6	LGG, THCA, THYM, KIRP, PRAD, SARC
ENSR00000075192	Intermediately specific	2	THYM, BRCA
[truncated: 398 more rows]

## Sheet: Table S9
Table S9 Putative target genes of eRNAs in 30 cancers from TCGA
Cancer type	eRNA id	eRNA position(hg19)	Related gene symbol	Gene position(hg19)	RankScore	Rs	P-value	FDR
ACC	ENSR00000119748	chr2:86723132-86729132	RNF181	chr2:85822848-85824736	2.421	0.315	0.0038	0.032
ACC	ENSR00000144311	chr22:24250281-24256281	FAM211B	chr22:24981588-24989175	2.896	0.347	0.0013	0.015
ACC	ENSR00000119748	chr2:86723132-86729132	VAMP8	chr2:85788685-85809154	4.207	0.417	6.2e-05	0.0016
ACC	ENSR00000200931	chr6:109490750-109496750	FOXO3	chr6:108881038-109005977	3.134	0.361	0.00073	0.0099
ACC	ENSR00000263774	chr11:43879550-43885550	HSD17B12	chr11:43577986-43878167	6.963	0.52	1.1e-07	1.1e-05
ACC	ENSR00000119748	chr2:86723132-86729132	RNF103	chr2:86830516-86850989	6.964	0.52	1.1e-07	1.1e-05
ACC	ENSR00000109507	chr19:40817798-40823798	HIPK4	chr19:40885178-40896094	5.868	0.485	1.4e-06	8.2e-05
ACC	ENSR00000119748	chr2:86723132-86729132	USP39	chr2:85829979-85876403	5.832	0.483	1.5e-06	8.7e-05
ACC	ENSR00000195227	chr6:28384991-28390991	TRIM27	chr6:28870779-28891766	6.655	0.511	2.2e-07	1.9e-05
ACC	ENSR00000200931	chr6:109490750-109496750	SESN1	chr6:109307640-109416022	3.04	0.356	0.00091	0.012
ACC	ENSR00000119748	chr2:86723132-86729132	TMEM150A	chr2:85825671-85830319	6.325	0.5	4.7e-07	3.5e-05
ACC	ENSR00000273807	chr14:24939706-24945706	SDR39U1	chr14:24908972-24912111	5.48	0.471	3.3e-06	0.00017
ACC	ENSR00000169561	chr4:77862060-77868060	SHROOM3	chr4:77356253-77704406	3.109	0.36	0.00078	0.01
ACC	ENSR00000119748	chr2:86723132-86729132	RMND5A	chr2:86947296-87005164	12.486	0.641	3.3e-13	2.7e-10
ACC	ENSR00000273807	chr14:24939706-24945706	NOP9	chr14:24769068-24778330	2.389	0.313	0.0041	0.034
ACC	ENSR00000119748	chr2:86723132-86729132	POLR1A	chr2:86247339-86333278	5.821	0.483	1.5e-06	8.9e-05
ACC	ENSR00000119748	chr2:86723132-86729132	KDM3A	chr2:86667770-86719839	2.94	0.349	0.0011	0.014
ACC	ENSR00000140824	chr21:27601957-27607957	GABPA	chr21:27106881-27144771	2.427	0.316	0.0037	0.032
ACC	ENSR00000140825	chr21:27605820-27611820	GABPA	chr21:27106881-27144771	3.013	0.354	0.00097	0.012
ACC	ENSR00000119748	chr2:86723132-86729132	PTCD3	chr2:86333305-86369280	7.037	0.522	9.2e-08	9.5e-06
ACC	ENSR00000263774	chr11:43879550-43885550	API5	chr11:43333513-43366079	4.669	0.438	2.1e-05	0.00071
ACC	ENSR00000200931	chr6:109490750-109496750	ZBTB24	chr6:109783797-109804440	8.226	0.555	5.9e-09	1e-06
ACC	ENSR00000169561	chr4:77862060-77868060	CNOT6L	chr4:78634541-78740769	5.79	0.482	1.6e-06	9.4e-05
ACC	ENSR00000119748	chr2:86723132-86729132	GGCX	chr2:85771846-85788670	5.914	0.486	1.2e-06	7.5e-05
ACC	ENSR00000119748	chr2:86723132-86729132	IMMT	chr2:86371055-86422893	10.72	0.61	1.9e-11	8.4e-09
ACC	ENSR00000119748	chr2:86723132-86729132	CHMP3	chr2:86730554-86948245	11.572	0.626	2.7e-12	1.6e-09
ACC	ENSR00000200931	chr6:109490750-109496750	SMPD2	chr6:109761966-109765122	8.964	0.573	1.1e-09	2.5e-07
ACC	ENSR00000200931	chr6:109490750-109496750	SNX3	chr6:108532426-108582464	5.35	0.466	4.5e-06	0.00021
ACC	ENSR00000273807	chr14:24939706-24945706	DCAF11	chr14:24583404-24594451	2.684	0.333	0.0021	0.021
ACC	ENSR00000119748	chr2:86723132-86729132	MAT2A	chr2:85766288-85772403	2.626	0.329	0.0024	0.023
ACC	ENSR00000119748	chr2:86723132-86729132	MRPL35	chr2:86426478-86440917	7.616	0.539	2.4e-08	3.2e-06
ACC	ENSR00000169561	chr4:77862060-77868060	SCARB2	chr4:77079890-77135046	4.486	0.43	3.3e-05	0.00098
ACC	ENSR00000263774	chr11:43879550-43885550	C11orf96	chr11:43946892-43965888	2.366	0.311	0.0043	0.035
ACC	ENSR00000191301	chr5:176527637-176533637	TSPAN17	chr5:176074388-176086058	6.474	0.505	3.4e-07	2.7e-05
ACC	ENSR00000263774	chr11:43879550-43885550	ALKBH3	chr11:43902361-43941816	4.669	0.438	2.1e-05	0.00071
ACC	ENSR00000119748	chr2:86723132-86729132	REEP1	chr2:86441116-86565206	3.275	0.369	0.00053	0.0078
ACC	ENSR00000169561	chr4:77862060-77868060	CCNI	chr4:77968311-77997158	5.509	0.472	3.1e-06	0.00016
ACC	ENSR00000109507	chr19:40817798-40823798	ITPKC	chr19:41223008-41246765	9.566	0.587	2.7e-10	7.8e-08
ACC	ENSR00000109507	chr19:40817798-40823798	EID2	chr19:40028890-40030870	10.299	0.602	5e-11	1.9e-08
ACC	ENSR00000109507	chr19:40817798-40823798	TIMM50	chr19:39971052-39984422	6.741	0.514	1.8e-07	1.6e-05
ACC	ENSR00000109507	chr19:40817798-40823798	NUMBL	chr19:41172596-41196877	6.615	0.51	2.4e-07	2.1e-05
ACC	ENSR00000109507	chr19:40817798-40823798	C19orf54	chr19:41246761-41257458	6.441	0.504	3.6e-07	2.9e-05
ACC	ENSR00000109507	chr19:40817798-40823798	RAB4B-EGLN2	chr19:41284147-41314103	3.899	0.403	0.00013	0.0027
ACC	ENSR00000109507	chr19:40817798-40823798	AXL	chr19:41725108-41767671	2.762	0.338	0.0017	0.018
ACC	ENSR00000109507	chr19:40817798-40823798	PSMC4	chr19:40476912-40487348	6.989	0.521	1e-07	1e-05
ACC	ENSR00000109507	chr19:40817798-40823798	EID2B	chr19:40021630-40023494	8.487	0.562	3.3e-09	6.1e-07
ACC	ENSR00000273807	chr14:24939706-24945706	RNF31	chr14:24615892-24629870	5.412	0.468	3.9e-06	0.00019
ACC	ENSR00000263774	chr11:43879550-43885550	EXT2	chr11:44117099-44266979	4.446	0.428	3.6e-05	0.001
ACC	ENSR00000109507	chr19:40817798-40823798	CCDC97	chr19:41816094-41830788	8.912	0.572	1.2e-09	2.7e-07
ACC	ENSR00000273807	chr14:24939706-24945706	TINF2	chr14:24708849-24711880	8.105	0.552	7.9e-09	1.3e-06
ACC	ENSR00000195227	chr6:28384991-28390991	ZKSCAN3	chr6:28317691-28336947	7.926	0.547	1.2e-08	1.8e-06
ACC	ENSR00000195227	chr6:28384991-28390991	ZKSCAN4	chr6:28212401-28227011	12.82	0.646	1.5e-13	1.4e-10
ACC	ENSR00000109507	chr19:40817798-40823798	FBL	chr19:40325098-40337054	6.821	0.516	1.5e-07	1.4e-05
ACC	ENSR00000109507	chr19:40817798-40823798	CYP2A6	chr19:41349443-41356352	-2.989	-0.352	0.001	0.013
ACC	ENSR00000109507	chr19:40817798-40823798	HNRNPUL1	chr19:41768401-41813503	10.136	0.599	7.3e-11	2.6e-08
ACC	ENSR00000109507	chr19:40817798-40823798	C19orf47	chr19:40825443-40854434	15.51	0.684	3.1e-16	7e-13
ACC	ENSR00000195227	chr6:28384991-28390991	ZSCAN12	chr6:28346732-28367511	8.352	0.558	4.4e-09	7.9e-07
ACC	ENSR00000109507	chr19:40817798-40823798	PLEKHG2	chr19:39903225-39919054	6.554	0.508	2.8e-07	2.3e-05
ACC	ENSR00000109507	chr19:40817798-40823798	SHKBP1	chr19:41082757-41097305	7.321	0.531	4.8e-08	5.6e-06
ACC	ENSR00000109507	chr19:40817798-40823798	RPS16	chr19:39923847-39926588	7.214	0.528	6.1e-08	6.8e-06
ACC	ENSR00000169561	chr4:77862060-77868060	SEPT11	chr4:77870856-77961537	20.856	0.738	1.4e-21	1.5e-17
ACC	ENSR00000169561	chr4:77862060-77868060	NUP54	chr4:77035812-77069668	8.113	0.552	7.7e-09	1.2e-06
ACC	ENSR00000109507	chr19:40817798-40823798	ZFP36	chr19:39897453-39900052	4.454	0.429	3.5e-05	0.001
ACC	ENSR00000195227	chr6:28384991-28390991	ZKSCAN8	chr6:28109688-28127250	6.703	0.512	2e-07	1.8e-05
ACC	ENSR00000200931	chr6:109490750-109496750	CEP57L1	chr6:109416313-109485135	8.316	0.557	4.8e-09	8.5e-07
ACC	ENSR00000273807	chr14:24939706-24945706	KHNYN	chr14:24898492-24910540	2.227	0.301	0.0059	0.044
ACC	ENSR00000140825	chr21:27605820-27611820	ADAMTS1	chr21:28208066-28217728	4.606	0.435	2.5e-05	0.00079
ACC	ENSR00000140824	chr21:27601957-27607957	ADAMTS1	chr21:28208066-28217728	4.049	0.41	8.9e-05	0.0021
ACC	ENSR00000304730	chr3:75730951-75736951	ZNF717	chr3:75758794-75834734	2.533	0.323	0.0029	0.027
ACC	ENSR00000109507	chr19:40817798-40823798	PAF1	chr19:39876492-39881835	12.26	0.637	5.5e-13	4.2e-10
ACC	ENSR00000109507	chr19:40817798-40823798	ZNF780A	chr19:40575059-40596845	3.824	0.399	0.00015	0.0031
ACC	ENSR00000109507	chr19:40817798-40823798	SAMD4B	chr19:39833036-39876350	12.848	0.647	1.4e-13	1.3e-10
ACC	ENSR00000109507	chr19:40817798-40823798	MAP3K10	chr19:40697651-40721482	2.565	0.325	0.0027	0.025
ACC	ENSR00000263774	chr11:43879550-43885550	TTC17	chr11:43380482-43516483	2.418	0.315	0.0038	0.032
ACC	ENSR00000195227	chr6:28384991-28390991	ZNF184	chr6:27418522-27440897	7.48	0.535	3.3e-08	4.1e-06
ACC	ENSR00000109507	chr19:40817798-40823798	BLVRB	chr19:40953696-40971747	-2.863	-0.345	0.0014	0.016
ACC	ENSR00000109507	chr19:40817798-40823798	CNTD2	chr19:40728115-40732597	4.254	0.42	5.6e-05	0.0015
ACC	ENSR00000109507	chr19:40817798-40823798	AKT2	chr19:40736224-40791443	18.553	0.717	2.8e-19	1.6e-15
ACC	ENSR00000109507	chr19:40817798-40823798	TGFB1	chr19:41807492-41859816	2.724	0.336	0.0019	0.02
ACC	ENSR00000238324	chr9:98567382-98573382	ZNF510	chr9:99518147-99540411	3.05	0.356	0.00089	0.011
ACC	ENSR00000273807	chr14:24939706-24945706	TM9SF1	chr14:24658349-24682679	4.179	0.416	6.6e-05	0.0017
ACC	ENSR00000109507	chr19:40817798-40823798	SERTAD1	chr19:40927499-40931932	7.692	0.541	2e-08	2.8e-06
ACC	ENSR00000273807	chr14:24939706-24945706	TSSK4	chr14:24674903-24677568	2.398	0.314	0.004	0.033
ACC	ENSR00000035846	chr11:1866731-1872731	SYT8	chr11:1848709-1858751	2.285	0.305	0.0052	0.04
ACC	ENSR00000109507	chr19:40817798-40823798	LTBP4	chr19:41098789-41135725	6.74	0.513	1.8e-07	1.6e-05
ACC	ENSR00000109507	chr19:40817798-40823798	SUPT5H	chr19:39926796-39967310	11.789	0.63	1.6e-12	1.1e-09
ACC	ENSR00000109507	chr19:40817798-40823798	SNRPA	chr19:41256542-41271294	6.494	0.506	3.2e-07	2.6e-05
ACC	ENSR00000200931	chr6:109490750-109496750	CD164	chr6:109687717-109703762	4.168	0.416	6.8e-05	0.0017
ACC	ENSR00000200931	chr6:109490750-109496750	WASF1	chr6:110421022-110501207	6.455	0.505	3.5e-07	2.8e-05
ACC	ENSR00000195227	chr6:28384991-28390991	ZSCAN9	chr6:28192664-28201260	3.577	0.386	0.00026	0.0047
ACC	ENSR00000200931	chr6:109490750-109496750	LACE1	chr6:108616098-108847999	2.677	0.333	0.0021	0.021
ACC	ENSR00000200931	chr6:109490750-109496750	FIG4	chr6:110012499-110146631	3.866	0.401	0.00014	0.0029
ACC	ENSR00000195227	chr6:28384991-28390991	PGBD1	chr6:28249314-28270326	4.388	0.426	4.1e-05	0.0012
ACC	ENSR00000191301	chr5:176527637-176533637	FGFR4	chr5:176513887-176525145	24.162	0.763	6.9e-25	1.6e-20
ACC	ENSR00000195227	chr6:28384991-28390991	ZSCAN23	chr6:28399707-28411279	5.54	0.473	2.9e-06	0.00015
ACC	ENSR00000273807	chr14:24939706-24945706	THTPA	chr14:24025216-24029480	7.782	0.544	1.7e-08	2.3e-06
ACC	ENSR00000123167	chr2:132266319-132272319	TUBA3D	chr2:132233666-132240507	2.965	0.351	0.0011	0.013
ACC	ENSR00000195227	chr6:28384991-28390991	SCAND3	chr6:28539407-28583989	3.673	0.391	0.00021	0.004
ACC	ENSR00000273807	chr14:24939706-24945706	GMPR2	chr14:24701628-24708448	3.104	0.359	0.00079	0.01
ACC	ENSR00000195227	chr6:28384991-28390991	ZSCAN31	chr6:28292470-28324048	4.771	0.443	1.7e-05	0.00059
ACC	ENSR00000191301	chr5:176527637-176533637	HK3	chr5:176307870-176326333	3.696	0.392	0.0002	0.0038
ACC	ENSR00000191301	chr5:176527637-176533637	CLTB	chr5:175819456-175843570	2.24	0.302	0.0058	0.043
ACC	ENSR00000035846	chr11:1866731-1872731	LSP1	chr11:1874200-1913497	4.204	0.417	6.2e-05	0.0016
ACC	ENSR00000140824	chr21:27601957-27607957	MRPL39	chr21:26957968-26979829	2.484	0.32	0.0033	0.029
ACC	ENSR00000191301	chr5:176527637-176533637	PRELID1	chr5:176730775-176733960	2.865	0.345	0.0014	0.016
ACC	ENSR00000111954	chr2:886198-892198	FAM150B	chr2:279558-288851	5.715	0.479	1.9e-06	0.00011
ACC	ENSR00000111953	chr2:883796-889796	FAM150B	chr2:279558-288851	5.545	0.473	2.9e-06	0.00015
ACC	ENSR00000111954	chr2:886198-892198	SNTG2	chr2:946554-1371385	4.422	0.427	3.8e-05	0.0011
ACC	ENSR00000111953	chr2:883796-889796	SNTG2	chr2:946554-1371385	4.403	0.426	4e-05	0.0011
ACC	ENSR00000167989	chr4:44982285-44988285	GNPDA2	chr4:44684217-44728612	4.49	0.43	3.2e-05	0.00097
ACC	ENSR00000167989	chr4:44982285-44988285	KCTD8	chr4:44175926-44450824	6.016	0.49	9.6e-07	6.2e-05
ACC	ENSR00000169561	chr4:77862060-77868060	MRPL1	chr4:78783674-78873944	3.133	0.361	0.00074	0.0099
ACC	ENSR00000140825	chr21:27605820-27611820	ADAMTS5	chr21:28290231-28338832	2.644	0.33	0.0023	0.022
ACC	ENSR00000140824	chr21:27601957-27607957	ADAMTS5	chr21:28290231-28338832	2.366	0.311	0.0043	0.035
ACC	ENSR00000035846	chr11:1866731-1872731	IFITM10	chr11:1753640-1771821	2.816	0.342	0.0015	0.017
ACC	ENSR00000035846	chr11:1866731-1872731	TRPM5	chr11:2425745-2444275	2.64	0.33	0.0023	0.022
ACC	ENSR00000169561	chr4:77862060-77868060	SOWAHB	chr4:77816082-77819002	5.35	0.466	4.5e-06	0.00021
ACC	ENSR00000238324	chr9:98567382-98573382	PTCH1	chr9:98205262-98279339	3.523	0.383	0.0003	0.0052
BLCA	ENSR00000144311	chr22:24250281-24256281	GSTT2B	chr22:24299601-24303373	-11.236	-0.315	5.8e-12	1.3e-10
BLCA	ENSR00000144312	chr22:24253187-24259187	GSTT2B	chr22:24299601-24303373	-10.544	-0.306	2.9e-11	5.8e-10
BLCA	ENSR00000304730	chr3:75730951-75736951	ZNF717	chr3:75758794-75834734	17.425	0.386	3.8e-18	2.3e-16
BLCA	ENSR00000304731	chr3:75734051-75740051	ZNF717	chr3:75758794-75834734	14.877	0.36	1.3e-15	5.6e-14
BLCA	ENSR00000304732	chr3:75735651-75741651	ZNF717	chr3:75758794-75834734	14.023	0.35	9.5e-15	3.5e-13
BLCA	ENSR00000273807	chr14:24939706-24945706	TM9SF1	chr14:24658349-24682679	13.564	0.345	2.7e-14	9.3e-13
BLCA	ENSR00000273807	chr14:24939706-24945706	GMPR2	chr14:24701628-24708448	13.998	0.35	1e-14	3.7e-13
BLCA	ENSR00000273807	chr14:24939706-24945706	TSSK4	chr14:24674903-24677568	10.539	0.305	2.9e-11	5.9e-10
BLCA	ENSR00000273807	chr14:24939706-24945706	DCAF11	chr14:24583404-24594451	12.261	0.329	5.5e-13	1.5e-11
BLCA	ENSR00000273807	chr14:24939706-24945706	NOP9	chr14:24769068-24778330	10.727	0.308	1.9e-11	4e-10
BLCA	ENSR00000273807	chr14:24939706-24945706	THTPA	chr14:24025216-24029480	11.442	0.318	3.6e-12	8.7e-11
BLCA	ENSR00000273807	chr14:24939706-24945706	KHNYN	chr14:24898492-24910540	16.214	0.374	6.1e-17	3.1e-15
BLCA	ENSR00000273807	chr14:24939706-24945706	RNF31	chr14:24615892-24629870	21.482	0.423	3.3e-22	3.4e-20
BLCA	3:31646637-31652637	chr3:31688129-31694129	GPD1L	chr3:32147181-32210205	16.983	0.382	1e-17	5.9e-16
BLCA	ENSR00000115691	chr2:39724941-39730941	MAP4K3	chr2:39476407-39664453	22.169	0.429	6.8e-23	7.6e-21
BLCA	ENSR00000080397	chr15:82975594-82981587	GOLGA6L9	chr15:82722223-82731338	29.96	0.486	1.1e-30	2.9e-28
BLCA	ENSR00000251054	chr1:31926247-31932247	TINAGL1	chr1:32042116-32053288	21.262	0.422	5.5e-22	5.5e-20
BLCA	ENSR00000251064	chr1:32026801-32032801	TINAGL1	chr1:32042116-32053288	109.159	0.732	6.9e-110	3.7e-105
BLCA	ENSR00000004207	chr1:32026301-32032301	TINAGL1	chr1:32042116-32053288	112.819	0.738	1.5e-113	9.6e-109
BLCA	ENSR00000022370	chr1:236651272-236657272	EDARADD	chr1:236511562-236648214	Inf	0.903	0	0
BLCA	ENSR00000257439	chr1:236650400-236656400	EDARADD	chr1:236511562-236648214	Inf	0.908	0	0
BLCA	ENSR00000022369	chr1:236650456-236656456	EDARADD	chr1:236511562-236648214	Inf	0.908	0	0
BLCA	ENSR00000022371	chr1:236652234-236658234	EDARADD	chr1:236511562-236648214	Inf	0.898	0	0
BLCA	ENSR00000261220	chr10:105622358-105628358	NT5C2	chr10:104845940-104953056	17.162	0.384	6.9e-18	4e-16
BLCA	ENSR00000251495	chr1:43602971-43608971	C1orf210	chr1:43747554-43751288	10.32	0.302	4.8e-11	9.4e-10
BLCA	ENSR00000300544	chr21:44204310-44210310	C2CD2	chr21:43305221-43373999	20.911	0.419	1.2e-21	1.2e-19
BLCA	ENSR00000142710	chr21:43719410-43725410	C2CD2	chr21:43305221-43373999	14.893	0.36	1.3e-15	5.4e-14
BLCA	ENSR00000165933	chr4:11438652-11444652	HS3ST1	chr4:11394774-11431389	93.523	0.705	3e-94	7.7e-90
BLCA	ENSR00000212043	chr7:46390477-46396477	IGFBP3	chr7:45951949-45961473	97.101	0.711	7.9e-98	2.5e-93
BLCA	ENSR00000208927	chr7:17459888-17465888	AGR2	chr7:16831435-16873057	33.663	0.508	2.2e-34	8.4e-32
BLCA	ENSR00000208877	chr7:17092382-17098382	AGR2	chr7:16831435-16873057	45.587	0.567	2.6e-46	2.9e-43
BLCA	ENSR00000324963	chr7:17465024-17471024	AGR2	chr7:16831435-16873057	31.481	0.495	3.3e-32	1e-29
BLCA	ENSR00000324955	chr7:17090124-17096124	AGR2	chr7:16831435-16873057	40.031	0.542	9.3e-41	6.6e-38
BLCA	7:17052139-17058139	chr7:17091763-17097763	AGR2	chr7:16831435-16873057	45.173	0.566	6.7e-46	7.4e-43
BLCA	ENSR00000324968	chr7:17511824-17517824	AGR2	chr7:16831435-16873057	22.538	0.432	2.9e-23	3.4e-21
BLCA	ENSR00000208867	chr7:17052350-17058350	AGR2	chr7:16831435-16873057	30.034	0.486	9.2e-31	2.5e-28
BLCA	ENSR00000208876	chr7:17090987-17096987	AGR2	chr7:16831435-16873057	42.127	0.552	7.5e-43	6.4e-40
BLCA	ENSR00000208879	chr7:17095424-17101424	AGR2	chr7:16831435-16873057	50.587	0.588	2.6e-51	4.4e-48
BLCA	ENSR00000208930	chr7:17481462-17487462	AGR2	chr7:16831435-16873057	28.693	0.477	2e-29	4.8e-27
BLCA	ENSR00000208925	chr7:17452729-17458729	AGR2	chr7:16831435-16873057	25.825	0.457	1.5e-26	2.6e-24
BLCA	ENSR00000324954	chr7:17088124-17094124	AGR2	chr7:16831435-16873057	32.363	0.5	4.3e-33	1.5e-30
BLCA	ENSR00000113747	chr2:20380061-20386061	SDC1	chr2:20400558-20425194	51.831	0.593	1.5e-52	2.8e-49
BLCA	ENSR00000113748	chr2:20382261-20388261	SDC1	chr2:20400558-20425194	52.875	0.597	1.3e-53	2.7e-50
BLCA	ENSR00000113746	chr2:20379418-20385418	SDC1	chr2:20400558-20425194	50.768	0.589	1.7e-51	3e-48
BLCA	ENSR00000075569	chr15:41151441-41157441	CHP1	chr15:41523037-41574043	21.119	0.42	7.6e-22	7.5e-20
BLCA	ENSR00000004207	chr1:32026301-32032301	PTP4A2	chr1:32372022-32410457	19.529	0.406	3e-20	2.4e-18
BLCA	ENSR00000251064	chr1:32026801-32032801	PTP4A2	chr1:32372022-32410457	18.856	0.4	1.4e-19	1e-17
BLCA	ENSR00000227959	chr8:101576722-101582722	SNX31	chr8:101585116-101675643	Inf	0.898	0	0
BLCA	ENSR00000228089	chr8:102483529-102489529	SNX31	chr8:101585116-101675643	48.16	0.578	6.9e-49	9.8e-46
BLCA	ENSR00000332564	chr8:101573328-101579328	SNX31	chr8:101585116-101675643	Inf	0.911	0	0
BLCA	ENSR00000227958	chr8:101573429-101579429	SNX31	chr8:101585116-101675643	Inf	0.911	0	0
BLCA	ENSR00000332607	chr8:102497328-102503328	SNX31	chr8:101585116-101675643	50.305	0.587	5e-51	8.3e-48
BLCA	ENSR00000251064	chr1:32026801-32032801	ZBTB8B	chr1:32930670-32962287	33.807	0.509	1.6e-34	6.2e-32
BLCA	ENSR00000004207	chr1:32026301-32032301	ZBTB8B	chr1:32930670-32962287	32.847	0.503	1.4e-33	5.1e-31
BLCA	ENSR00000013533	chr1:150604854-150610854	CGN	chr1:151482986-151511168	10.887	0.31	1.3e-11	2.8e-10
BLCA	ENSR00000107667	chr19:15703033-15709033	CYP4F12	chr19:15783567-15807984	31.391	0.494	4.1e-32	1.3e-29
BLCA	ENSR00000014617	chr1:160957126-160963126	PVRL4	chr1:161040785-161059389	38.936	0.536	1.2e-39	7.4e-37
BLCA	ENSR00000254910	chr1:160957290-160963290	PVRL4	chr1:161040785-161059389	38.949	0.536	1.1e-39	7.2e-37
BLCA	ENSR00000102816	chr18:43379965-43385965	SLC14A1	chr18:43304092-43332485	69.485	0.65	3.3e-70	2.3e-66
BLCA	ENSR00000285897	chr18:43376665-43382665	SLC14A1	chr18:43304092-43332485	73.462	0.66	3.5e-74	3.1e-70
BLCA	ENSR00000251064	chr1:32026801-32032801	SERINC2	chr1:31882412-31907525	49.777	0.585	1.7e-50	2.7e-47
BLCA	ENSR00000004207	chr1:32026301-32032301	SERINC2	chr1:31882412-31907525	46.428	0.571	3.7e-47	4.6e-44
BLCA	ENSR00000251054	chr1:31926247-31932247	SERINC2	chr1:31882412-31907525	22.92	0.435	1.2e-23	1.5e-21
BLCA	ENSR00000145812	chr22:36613739-36619739	IFT27	chr22:37154246-37172300	13.319	0.342	4.8e-14	1.6e-12
BLCA	ENSR00000145813	chr22:36614946-36620946	IFT27	chr22:37154246-37172300	12.563	0.332	2.7e-13	7.9e-12
BLCA	ENSR00000301799	chr22:36615146-36621146	IFT27	chr22:37154246-37172300	12.471	0.331	3.4e-13	9.7e-12
BLCA	ENSR00000130536	chr2:220230820-220236820	STK36	chr2:219536749-219567439	11.35	0.317	4.5e-12	1.1e-10
BLCA	ENSR00000107667	chr19:15703033-15709033	CYP4F22	chr19:15619304-15663128	32.384	0.5	4.1e-33	1.4e-30
BLCA	12:114698199-114704199	chr12:115136004-115142004	TBX3	chr12:115108059-115121969	152.998	0.787	1e-153	1.3e-148
BLCA	ENSR00000324954	chr7:17088124-17094124	AGR3	chr7:16899029-16921611	12.472	0.331	3.4e-13	9.6e-12
BLCA	ENSR00000324955	chr7:17090124-17096124	AGR3	chr7:16899029-16921611	12.378	0.33	4.2e-13	1.2e-11
BLCA	ENSR00000208877	chr7:17092382-17098382	AGR3	chr7:16899029-16921611	13.237	0.341	5.8e-14	1.9e-12
BLCA	ENSR00000208876	chr7:17090987-17096987	AGR3	chr7:16899029-16921611	12.453	0.331	3.5e-13	1e-11
BLCA	7:17052139-17058139	chr7:17091763-17097763	AGR3	chr7:16899029-16921611	13.171	0.34	6.7e-14	2.2e-12
BLCA	ENSR00000208927	chr7:17459888-17465888	AGR3	chr7:16899029-16921611	12.002	0.325	1e-12	2.6e-11
BLCA	ENSR00000324963	chr7:17465024-17471024	AGR3	chr7:16899029-16921611	11.941	0.324	1.1e-12	3e-11
BLCA	ENSR00000208879	chr7:17095424-17101424	AGR3	chr7:16899029-16921611	13.01	0.338	9.8e-14	3e-12
BLCA	ENSR00000164366	chr3:195889571-195895571	MFI2	chr3:196715492-196756687	-19.683	-0.408	2.1e-20	1.7e-18
BLCA	ENSR00000301799	chr22:36615146-36621146	APOL4	chr22:36585172-36600886	61.897	0.627	1.3e-62	5e-59
BLCA	ENSR00000145813	chr22:36614946-36620946	APOL4	chr22:36585172-36600886	62.133	0.628	7.4e-63	3e-59
BLCA	ENSR00000145812	chr22:36613739-36619739	APOL4	chr22:36585172-36600886	67.566	0.644	2.7e-68	1.7e-64
BLCA	ENSR00000148645	chr3:12493043-12499043	C3orf83	chr3:12556433-12602558	42.203	0.552	6.3e-43	5.4e-40
BLCA	ENSR00000148646	chr3:12497599-12503599	C3orf83	chr3:12556433-12602558	42.315	0.553	4.8e-43	4.2e-40
BLCA	ENSR00000328997	chr7:149235891-149241891	REPIN1	chr7:150065278-150071133	12.987	0.338	1e-13	3.2e-12
BLCA	ENSR00000148646	chr3:12497599-12503599	PPARG	chr3:12328867-12475855	Inf	0.883	0	0
BLCA	ENSR00000148645	chr3:12493043-12499043	PPARG	chr3:12328867-12475855	Inf	0.879	0	0
BLCA	ENSR00000169561	chr4:77862060-77868060	CCNG2	chr4:78078304-78354542	25.934	0.458	1.2e-26	2e-24
BLCA	ENSR00000169560	chr4:77861513-77867513	CCNG2	chr4:78078304-78354542	24.724	0.449	1.9e-25	2.9e-23
BLCA	ENSR00000155786	chr3:101409632-101415632	SENP7	chr3:101043049-101232085	38.932	0.536	1.2e-39	7.5e-37
BLCA	ENSR00000305257	chr3:101411844-101417844	SENP7	chr3:101043049-101232085	69.535	0.65	2.9e-70	2e-66
BLCA	ENSR00000155785	chr3:101406977-101412977	SENP7	chr3:101043049-101232085	34.11	0.511	7.8e-35	3.1e-32
BLCA	ENSR00000305256	chr3:101409644-101415644	SENP7	chr3:101043049-101232085	39.054	0.537	8.8e-40	5.7e-37
BLCA	ENSR00000155787	chr3:101411805-101417805	SENP7	chr3:101043049-101232085	67.567	0.644	2.7e-68	1.7e-64
BLCA	ENSR00000169561	chr4:77862060-77868060	FAM47E	chr4:77135193-77204933	11.212	0.315	6.1e-12	1.4e-10
BLCA	ENSR00000169560	chr4:77861513-77867513	FAM47E	chr4:77135193-77204933	11.355	0.317	4.4e-12	1e-10
BLCA	ENSR00000328997	chr7:149235891-149241891	ZNF786	chr7:148766735-148787874	24.941	0.451	1.1e-25	1.8e-23
BLCA	ENSR00000118753	chr2:71308030-71314030	TIA1	chr2:70436576-70475792	18.514	0.397	3.1e-19	2.2e-17
BLCA	ENSR00000290783	chr2:46856739-46862739	RHOQ	chr2:46768945-46810260	17.028	0.382	9.4e-18	5.4e-16
BLCA	ENSR00000116671	chr2:46856693-46862693	RHOQ	chr2:46768945-46810260	16.849	0.381	1.4e-17	7.9e-16
BLCA	11:121280143-121286143	chr11:121150852-121156852	SC5D	chr11:121163162-121179403	54.022	0.601	9.5e-55	2.1e-51
BLCA	ENSR00000111372	chr19:53963703-53969703	ZNF816	chr19:53430388-53466164	15.835	0.37	1.5e-16	7.1e-15
BLCA	ENSR00000328997	chr7:149235891-149241891	ZNF398	chr7:148823508-148880116	10.645	0.307	2.3e-11	4.7e-10
BLCA	ENSR00000300544	chr21:44204310-44210310	RSPH1	chr21:43892596-43916464	13.981	0.349	1e-14	3.8e-13
BLCA	21:43433470-43439470	chr21:44853350-44859350	RSPH1	chr21:43892596-43916464	18.22	0.394	6e-19	4.1e-17
BLCA	ENSR00000324954	chr7:17088124-17094124	ANKMY2	chr7:16639401-16685442	24.817	0.45	1.5e-25	2.3e-23
BLCA	ENSR00000208927	chr7:17459888-17465888	ANKMY2	chr7:16639401-16685442	14.352	0.354	4.4e-15	1.7e-13
BLCA	ENSR00000208877	chr7:17092382-17098382	ANKMY2	chr7:16639401-16685442	21.877	0.427	1.3e-22	1.4e-20
BLCA	ENSR00000208876	chr7:17090987-17096987	ANKMY2	chr7:16639401-16685442	23.689	0.441	2e-24	2.8e-22
BLCA	7:17052139-17058139	chr7:17091763-17097763	ANKMY2	chr7:16639401-16685442	21.844	0.426	1.4e-22	1.5e-20
BLCA	ENSR00000324963	chr7:17465024-17471024	ANKMY2	chr7:16639401-16685442	12.359	0.33	4.4e-13	1.2e-11
BLCA	ENSR00000208879	chr7:17095424-17101424	ANKMY2	chr7:16639401-16685442	14.082	0.351	8.3e-15	3.1e-13
BLCA	ENSR00000208867	chr7:17052350-17058350	ANKMY2	chr7:16639401-16685442	26.962	0.465	1.1e-27	2.1e-25
BLCA	ENSR00000324955	chr7:17090124-17096124	ANKMY2	chr7:16639401-16685442	23.484	0.44	3.3e-24	4.3e-22
BLCA	ENSR00000075569	chr15:41151441-41157441	PPP1R14D	chr15:41107650-41120907	29.055	0.48	8.8e-30	2.2e-27
BLCA	ENSR00000227958	chr8:101573429-101579429	RNF19A	chr8:101269288-101348446	23.237	0.438	5.8e-24	7.4e-22
BLCA	ENSR00000332564	chr8:101573328-101579328	RNF19A	chr8:101269288-101348446	23.188	0.437	6.5e-24	8.2e-22
BLCA	ENSR00000227959	chr8:101576722-101582722	RNF19A	chr8:101269288-101348446	26.402	0.461	4e-27	7.3e-25
BLCA	ENSR00000197650	chr6:47110102-47116102	GPR110	chr6:46965440-47010099	22.961	0.436	1.1e-23	1.4e-21
BLCA	ENSR00000197649	chr6:47109385-47115385	GPR110	chr6:46965440-47010099	22.642	0.433	2.3e-23	2.7e-21
BLCA	ENSR00000197645	chr6:47091636-47097636	GPR110	chr6:46965440-47010099	35.477	0.518	3.3e-36	1.5e-33
BLCA	ENSR00000197646	chr6:47095106-47101106	GPR110	chr6:46965440-47010099	42.759	0.555	1.7e-43	1.6e-40
BLCA	ENSR00000075569	chr15:41151441-41157441	SPINT1	chr15:41136216-41150405	253.486	0.854	3.3e-254	9.3e-249
BLCA	ENSR00000197646	chr6:47095106-47101106	CD2AP	chr6:47445525-47594999	11.04	0.312	9.1e-12	2e-10
BLCA	ENSR00000197645	chr6:47091636-47097636	CD2AP	chr6:47445525-47594999	10.797	0.309	1.6e-11	3.4e-10
BLCA	ENSR00000300544	chr21:44204310-44210310	SLC37A1	chr21:43916118-44001550	38.839	0.536	1.4e-39	9.2e-37
BLCA	ENSR00000142710	chr21:43719410-43725410	SLC37A1	chr21:43916118-44001550	11.841	0.323	1.4e-12	3.7e-11
BLCA	21:43433470-43439470	chr21:44853350-44859350	SLC37A1	chr21:43916118-44001550	37.759	0.53	1.7e-38	1e-35
BLCA	ENSR00000303848	chr3:46091892-46097892	SACM1L	chr3:45730548-45786916	13.23	0.341	5.9e-14	1.9e-12
BLCA	ENSR00000328997	chr7:149235891-149241891	ZNF862	chr7:149535456-149564568	52.997	0.597	1e-53	2.1e-50
BLCA	ENSR00000013533	chr1:150604854-150610854	GOLPH3L	chr1:150618701-150669630	19.524	0.406	3e-20	2.4e-18
BLCA	11:121280143-121286143	chr11:121150852-121156852	SORL1	chr11:121322912-121504402	28.85	0.478	1.4e-29	3.4e-27
BLCA	ENSR00000172593	chr4:121949050-121955050	NDNF	chr4:121956768-121994176	260.241	0.857	5.7e-261	1.8e-255
BLCA	3:31646637-31652637	chr3:31688129-31694129	CMTM6	chr3:32522804-32544900	15.925	0.371	1.2e-16	5.8e-15
BLCA	ENSR00000006992	chr1:56952552-56958552	DAB1	chr1:57460451-59012406	12.665	0.334	2.2e-13	6.4e-12
BLCA	ENSR00000328997	chr7:149235891-149241891	ZNF425	chr7:148799876-148823438	20.492	0.415	3.2e-21	2.9e-19
BLCA	ENSR00000332564	chr8:101573328-101579328	PABPC1	chr8:101698044-101735037	47.261	0.574	5.5e-48	7.2e-45
BLCA	ENSR00000227959	chr8:101576722-101582722	PABPC1	chr8:101698044-101735037	46.418	0.571	3.8e-47	4.7e-44
BLCA	ENSR00000332607	chr8:102497328-102503328	PABPC1	chr8:101698044-101735037	31.464	0.495	3.4e-32	1.1e-29
BLCA	ENSR00000227958	chr8:101573429-101579429	PABPC1	chr8:101698044-101735037	47.329	0.575	4.7e-48	6.2e-45
BLCA	ENSR00000228089	chr8:102483529-102489529	PABPC1	chr8:101698044-101735037	33.558	0.507	2.8e-34	1.1e-31
BLCA	ENSR00000107667	chr19:15703033-15709033	CYP4F3	chr19:15751707-15773635	11.265	0.315	5.4e-12	1.3e-10
BLCA	ENSR00000197645	chr6:47091636-47097636	TNFRSF21	chr6:47199268-47277641	64.766	0.636	1.7e-65	8.6e-62
BLCA	ENSR00000197650	chr6:47110102-47116102	TNFRSF21	chr6:47199268-47277641	31.302	0.494	5e-32	1.5e-29
BLCA	ENSR00000197646	chr6:47095106-47101106	TNFRSF21	chr6:47199268-47277641	72.683	0.658	2.1e-73	1.8e-69
BLCA	ENSR00000197649	chr6:47109385-47115385	TNFRSF21	chr6:47199268-47277641	31.643	0.496	2.3e-32	7.3e-30
BLCA	ENSR00000324955	chr7:17090124-17096124	AHR	chr7:17338246-17385776	75.265	0.665	5.4e-76	5.4e-72
BLCA	ENSR00000208876	chr7:17090987-17096987	AHR	chr7:17338246-17385776	76.758	0.668	1.7e-77	1.9e-73
BLCA	ENSR00000208930	chr7:17481462-17487462	AHR	chr7:17338246-17385776	42.106	0.552	7.8e-43	6.7e-40
BLCA	ENSR00000208879	chr7:17095424-17101424	AHR	chr7:17338246-17385776	45.991	0.569	1e-46	1.2e-43
BLCA	ENSR00000324963	chr7:17465024-17471024	AHR	chr7:17338246-17385776	45.483	0.567	3.3e-46	3.7e-43
BLCA	ENSR00000324954	chr7:17088124-17094124	AHR	chr7:17338246-17385776	75.542	0.665	2.9e-76	2.9e-72
BLCA	7:17052139-17058139	chr7:17091763-17097763	AHR	chr7:17338246-17385776	73.044	0.659	9e-74	7.9e-70
BLCA	ENSR00000324968	chr7:17511824-17517824	AHR	chr7:17338246-17385776	43.444	0.558	3.6e-44	3.4e-41
BLCA	ENSR00000208877	chr7:17092382-17098382	AHR	chr7:17338246-17385776	72.947	0.659	1.1e-73	9.8e-70
BLCA	ENSR00000208927	chr7:17459888-17465888	AHR	chr7:17338246-17385776	52.482	0.595	3.3e-53	6.6e-50
BLCA	ENSR00000208925	chr7:17452729-17458729	AHR	chr7:17338246-17385776	46.07	0.569	8.5e-47	1e-43
BLCA	ENSR00000208867	chr7:17052350-17058350	AHR	chr7:17338246-17385776	86.607	0.691	2.5e-87	4.4e-83
BLCA	ENSR00000107667	chr19:15703033-15709033	CYP4F2	chr19:15988833-16008930	25.985	0.459	1e-26	1.8e-24
BLCA	ENSR00000107667	chr19:15703033-15709033	OR10H1	chr19:15917817-15918936	11.339	0.316	4.6e-12	1.1e-10
BLCA	ENSR00000227958	chr8:101573429-101579429	GRHL2	chr8:102504660-102681954	13.495	0.344	3.2e-14	1.1e-12
BLCA	ENSR00000228089	chr8:102483529-102489529	GRHL2	chr8:102504660-102681954	153.109	0.787	7.8e-154	1e-148
BLCA	ENSR00000332607	chr8:102497328-102503328	GRHL2	chr8:102504660-102681954	171.443	0.803	3.6e-172	5.7e-167
BLCA	ENSR00000332564	chr8:101573328-101579328	GRHL2	chr8:102504660-102681954	13.39	0.342	4.1e-14	1.4e-12
BLCA	ENSR00000195227	chr6:28384991-28390991	ZSCAN16	chr6:28092338-28097860	12.225	0.328	6e-13	1.6e-11
BLCA	ENSR00000112643	chr2:9890581-9896581	GRHL1	chr2:10085341-10142411	11.77	0.322	1.7e-12	4.3e-11
BLCA	ENSR00000118753	chr2:71308030-71314030	MCEE	chr2:71336814-71357369	58.262	0.616	5.5e-59	1.7e-55
BLCA	ENSR00000111372	chr19:53963703-53969703	TTYH1	chr19:54926393-54948080	15.367	0.365	4.3e-16	1.9e-14
BLCA	ENSR00000148645	chr3:12493043-12499043	TSEN2	chr3:12525931-12581122	33.158	0.505	7e-34	2.6e-31
BLCA	ENSR00000148646	chr3:12497599-12503599	TSEN2	chr3:12525931-12581122	35.386	0.518	4.1e-36	1.9e-33
BLCA	ENSR00000310566	chr4:77834653-77840653	SOWAHB	chr4:77816082-77819002	105.114	0.725	7.7e-106	3.5e-101
BLCA	ENSR00000169561	chr4:77862060-77868060	SOWAHB	chr4:77816082-77819002	22.353	0.431	4.4e-23	5.1e-21
BLCA	ENSR00000169560	chr4:77861513-77867513	SOWAHB	chr4:77816082-77819002	21.13	0.42	7.4e-22	7.3e-20
BLCA	ENSR00000285897	chr18:43376665-43382665	SIGLEC15	chr18:43405477-43424045	117.962	0.745	1.1e-118	8.2e-114
BLCA	ENSR00000102816	chr18:43379965-43385965	SIGLEC15	chr18:43405477-43424045	106.503	0.728	3.1e-107	1.5e-102
BLCA	ENSR00000111372	chr19:53963703-53969703	ZNF600	chr19:53267448-53290044	16.227	0.374	5.9e-17	3e-15
BLCA	ENSR00000300544	chr21:44204310-44210310	PDE9A	chr21:44073746-44195619	42.133	0.552	7.4e-43	6.3e-40
BLCA	ENSR00000271728	chr13:41441236-41447236	ELF1	chr13:41506056-41635576	21.242	0.421	5.7e-22	5.7e-20
BLCA	ENSR00000164366	chr3:195889571-195895571	MUC20	chr3:195447753-195467994	40.103	0.542	7.9e-41	5.6e-38
BLCA	ENSR00000111372	chr19:53963703-53969703	ZNF83	chr19:53097313-53193749	24.291	0.446	5.1e-25	7.4e-23
BLCA	ENSR00000111372	chr19:53963703-53969703	ZNF160	chr19:53569859-53606689	10.437	0.304	3.7e-11	7.3e-10
BLCA	ENSR00000022370	chr1:236651272-236657272	GPR137B	chr1:236305832-236385165	29.681	0.484	2.1e-30	5.4e-28
BLCA	ENSR00000022371	chr1:236652234-236658234	GPR137B	chr1:236305832-236385165	28.103	0.473	7.9e-29	1.7e-26
BLCA	ENSR00000257439	chr1:236650400-236656400	GPR137B	chr1:236305832-236385165	30.501	0.489	3.2e-31	8.9e-29
BLCA	ENSR00000022369	chr1:236650456-236656456	GPR137B	chr1:236305832-236385165	30.481	0.489	3.3e-31	9.4e-29
BLCA	7:17052139-17058139	chr7:17091763-17097763	TSPAN13	chr7:16793160-16824161	21.648	0.425	2.2e-22	2.4e-20
BLCA	ENSR00000208876	chr7:17090987-17096987	TSPAN13	chr7:16793160-16824161	21.722	0.425	1.9e-22	2e-20
BLCA	ENSR00000208877	chr7:17092382-17098382	TSPAN13	chr7:16793160-16824161	21.99	0.428	1e-22	1.1e-20
BLCA	ENSR00000324954	chr7:17088124-17094124	TSPAN13	chr7:16793160-16824161	22.707	0.433	2e-23	2.4e-21
BLCA	ENSR00000208867	chr7:17052350-17058350	TSPAN13	chr7:16793160-16824161	15.601	0.368	2.5e-16	1.2e-14
BLCA	ENSR00000324955	chr7:17090124-17096124	TSPAN13	chr7:16793160-16824161	21.429	0.423	3.7e-22	3.8e-20
BLCA	ENSR00000208879	chr7:17095424-17101424	TSPAN13	chr7:16793160-16824161	16.882	0.381	1.3e-17	7.4e-16
BLCA	ENSR00000006992	chr1:56952552-56958552	PPAP2B	chr1:56960419-57110974	175.591	0.807	2.6e-176	4.2e-171
BLCA	ENSR00000163986	chr3:193542879-193548879	HES1	chr3:193853934-193856521	31.247	0.494	5.7e-32	1.7e-29
BLCA	ENSR00000043150	chr11:87837088-87843088	CTSC	chr11:88026760-88070955	29.695	0.484	2e-30	5.3e-28
BLCA	ENSR00000145812	chr22:36613739-36619739	PVALB	chr22:37196728-37215523	13.196	0.34	6.4e-14	2e-12
BLCA	ENSR00000145813	chr22:36614946-36620946	PVALB	chr22:37196728-37215523	12.329	0.329	4.7e-13	1.3e-11
BLCA	ENSR00000301799	chr22:36615146-36621146	PVALB	chr22:37196728-37215523	12.22	0.328	6e-13	1.6e-11
BLCA	ENSR00000107667	chr19:15703033-15709033	PGLYRP2	chr19:15579456-15609767	21.52	0.424	3e-22	3.1e-20
BLCA	ENSR00000112643	chr2:9890581-9896581	MBOAT2	chr2:8992820-9143942	10.636	0.307	2.3e-11	4.8e-10
BLCA	ENSR00000328997	chr7:149235891-149241891	ZNF775	chr7:150065879-150109558	12.315	0.329	4.8e-13	1.3e-11
BLCA	ENSR00000169561	chr4:77862060-77868060	FAM47E-STBD1	chr4:77172886-77232752	10.945	0.311	1.1e-11	2.5e-10
BLCA	ENSR00000115691	chr2:39724941-39730941	TMEM178A	chr2:39892122-39945103	106.865	0.728	1.4e-107	6.7e-103
BLCA	ENSR00000118753	chr2:71308030-71314030	NAGK	chr2:71291474-71306935	24.324	0.446	4.7e-25	6.9e-23
BLCA	ENSR00000023865	chr10:5642955-5648955	IL15RA	chr10:5990855-6020150	18.306	0.395	4.9e-19	3.4e-17
BLCA	ENSR00000258015	chr10:5642463-5648463	IL15RA	chr10:5990855-6020150	19.752	0.408	1.8e-20	1.5e-18
BLCA	ENSR00000164366	chr3:195889571-195895571	PIGZ	chr3:196673214-196695931	20.179	0.412	6.6e-21	5.8e-19
BLCA	ENSR00000164478	chr3:196702814-196708814	PIGZ	chr3:196673214-196695931	73.805	0.661	1.6e-74	1.4e-70
BLCA	ENSR00000308259	chr3:196702671-196708671	PIGZ	chr3:196673214-196695931	73.819	0.661	1.5e-74	1.4e-70
BLCA	ENSR00000164479	chr3:196703571-196709571	PIGZ	chr3:196673214-196695931	73.891	0.661	1.3e-74	1.2e-70
BLCA	ENSR00000111203	chr19:52015345-52021345	ZNF175	chr19:52074551-52092991	23.025	0.436	9.4e-24	1.2e-21
BLCA	ENSR00000004207	chr1:32026301-32032301	FAM229A	chr1:32826871-32829879	18.305	0.395	5e-19	3.4e-17
BLCA	ENSR00000251064	chr1:32026801-32032801	FAM229A	chr1:32826871-32829879	17.279	0.385	5.3e-18	3.1e-16
BLCA	ENSR00000164366	chr3:195889571-195895571	TNK2	chr3:195590235-195638816	28.771	0.478	1.7e-29	4e-27
BLCA	ENSR00000148645	chr3:12493043-12499043	TMEM40	chr3:12775024-12810956	10.214	0.301	6.1e-11	1.2e-09
BLCA	ENSR00000051395	chr12:47774930-47780930	PCED1B	chr12:47473386-47630443	13.452	0.343	3.5e-14	1.2e-12
BLCA	ENSR00000051396	chr12:47778990-47784990	PCED1B	chr12:47473386-47630443	12.35	0.33	4.5e-13	1.2e-11
BLCA	ENSR00000195227	chr6:28384991-28390991	ZSCAN9	chr6:28192664-28201260	21.366	0.422	4.3e-22	4.4e-20
BLCA	ENSR00000014617	chr1:160957126-160963126	TSTD1	chr1:161007421-161008780	13.919	0.349	1.2e-14	4.4e-13
BLCA	ENSR00000254910	chr1:160957290-160963290	TSTD1	chr1:161007421-161008780	13.236	0.341	5.8e-14	1.9e-12
BLCA	5:37099086-37105086	chr5:37099188-37105188	NIPBL	chr5:36876861-37066515	55.925	0.608	1.2e-56	3.1e-53
BLCA	5:37099086-37105086	chr5:37099188-37105188	C5orf42	chr5:37106330-37249530	164.752	0.798	1.8e-165	2.6e-160
BLCA	ENSR00000169560	chr4:77861513-77867513	SEPT11	chr4:77870856-77961537	23.525	0.44	3e-24	3.9e-22
BLCA	ENSR00000169561	chr4:77862060-77868060	SEPT11	chr4:77870856-77961537	27.486	0.469	3.3e-28	6.8e-26
BLCA	ENSR00000013533	chr1:150604854-150610854	RPRD2	chr1:150335567-150449042	13.487	0.344	3.3e-14	1.1e-12
BLCA	ENSR00000169561	chr4:77862060-77868060	SCARB2	chr4:77079890-77135046	21.502	0.424	3.2e-22	3.3e-20
BLCA	ENSR00000169560	chr4:77861513-77867513	SCARB2	chr4:77079890-77135046	17.204	0.384	6.2e-18	3.7e-16
BLCA	ENSR00000263612	chr11:36501150-36507150	TRIM44	chr11:35684353-35829775	17.604	0.388	2.5e-18	1.6e-16
BLCA	ENSR00000251495	chr1:43602971-43608971	KDM4A	chr1:44115829-44171186	14.069	0.35	8.5e-15	3.2e-13
BLCA	ENSR00000005553	chr1:43600563-43606563	KDM4A	chr1:44115829-44171186	13.149	0.34	7.1e-14	2.3e-12
BLCA	ENSR00000013533	chr1:150604854-150610854	ZNF687	chr1:151254094-151264656	20.962	0.419	1.1e-21	1.1e-19
BLCA	5:43048497-43054497	chr5:43048599-43054599	NNT	chr5:43602794-43707507	21.852	0.426	1.4e-22	1.5e-20
BLCA	ENSR00000011610	chr1:114231890-114237890	MAGI3	chr1:113933371-114228545	59.103	0.618	7.9e-60	2.6e-56
BLCA	ENSR00000305257	chr3:101411844-101417844	CEP97	chr3:101442769-101489406	35.044	0.516	9e-36	4e-33
BLCA	ENSR00000155787	chr3:101411805-101417805	CEP97	chr3:101442769-101489406	34.925	0.515	1.2e-35	5.2e-33
BLCA	ENSR00000014617	chr1:160957126-160963126	ATF6	chr1:161736084-161933860	13.129	0.339	7.4e-14	2.4e-12
BLCA	ENSR00000254910	chr1:160957290-160963290	ATF6	chr1:161736084-161933860	13.742	0.347	1.8e-14	6.4e-13
BLCA	ENSR00000011610	chr1:114231890-114237890	HIPK1	chr1:114471814-114520426	29.023	0.479	9.5e-30	2.3e-27
BLCA	ENSR00000195227	chr6:28384991-28390991	ZNF184	chr6:27418522-27440897	14.073	0.351	8.5e-15	3.1e-13
BLCA	ENSR00000088030	chr16:75623198-75629198	TERF2IP	chr16:75681684-75795770	25.815	0.457	1.5e-26	2.6e-24
BLCA	ENSR00000313236	chr4:177259451-177265451	SPCS3	chr4:177241115-177253396	45.396	0.567	4e-46	4.5e-43
BLCA	ENSR00000313237	chr4:177261951-177267951	SPCS3	chr4:177241115-177253396	37.257	0.528	5.5e-38	3e-35
BLCA	ENSR00000271728	chr13:41441236-41447236	NAA16	chr13:41885341-41951166	44.788	0.564	1.6e-45	1.7e-42
BLCA	ENSR00000271728	chr13:41441236-41447236	WBP4	chr13:41635410-41658137	19.807	0.409	1.6e-20	1.3e-18
BLCA	ENSR00000011610	chr1:114231890-114237890	RSBN1	chr1:114304454-114355098	11.045	0.312	9e-12	2e-10
BLCA	ENSR00000051396	chr12:47778990-47784990	VDR	chr12:48235320-48336831	29.91	0.485	1.2e-30	3.3e-28
BLCA	ENSR00000051395	chr12:47774930-47780930	VDR	chr12:48235320-48336831	27.975	0.472	1.1e-28	2.3e-26
BLCA	ENSR00000251495	chr1:43602971-43608971	SLC2A1	chr1:43391052-43424530	13.26	0.341	5.5e-14	1.8e-12
BLCA	ENSR00000005553	chr1:43600563-43606563	SLC2A1	chr1:43391052-43424530	12.326	0.329	4.7e-13	1.3e-11
BLCA	ENSR00000258015	chr10:5642463-5648463	CALML3	chr10:5566924-5568225	28.863	0.478	1.4e-29	3.3e-27
BLCA	10:5484083-5490083	chr10:5526046-5532046	CALML3	chr10:5566924-5568225	14.439	0.355	3.6e-15	1.4e-13
BLCA	ENSR00000023865	chr10:5642955-5648955	CALML3	chr10:5566924-5568225	28.419	0.475	3.8e-29	8.7e-27
BLCA	ENSR00000075569	chr15:41151441-41157441	PAK6	chr15:40509629-40569688	11.655	0.321	2.2e-12	5.5e-11
BLCA	ENSR00000075569	chr15:41151441-41157441	RHOV	chr15:41164412-41166487	105.4	0.726	4e-106	1.8e-101
BLCA	ENSR00000043150	chr11:87837088-87843088	RAB38	chr11:87846410-87908635	Inf	0.877	0	0
BLCA	ENSR00000261220	chr10:105622358-105628358	OBFC1	chr10:105642300-105677963	32.734	0.503	1.8e-33	6.6e-31
BLCA	ENSR00000195227	chr6:28384991-28390991	PGBD1	chr6:28249314-28270326	15.269	0.364	5.4e-16	2.4e-14
BLCA	ENSR00000011610	chr1:114231890-114237890	DCLRE1B	chr1:114447763-114456708	20.617	0.416	2.4e-21	2.2e-19
BLCA	ENSR00000335037	chr9:36678697-36684697	GRHPR	chr9:37422663-37436987	20.199	0.412	6.3e-21	5.6e-19
BLCA	ENSR00000005553	chr1:43600563-43606563	FAM183A	chr1:43610824-43622067	54.08	0.601	8.3e-55	1.9e-51
BLCA	ENSR00000251495	chr1:43602971-43608971	FAM183A	chr1:43610824-43622067	62.982	0.631	1e-63	4.5e-60
BLCA	ENSR00000263612	chr11:36501150-36507150	RAG1	chr11:36532259-36614706	10.219	0.301	6e-11	1.2e-09
BLCA	1:168559308-168565308	chr1:168528546-168534546	XCL1	chr1:168545711-168551315	131.708	0.763	2e-132	2e-127
BLCA	ENSR00000142710	chr21:43719410-43725410	ABCG1	chr21:43619799-43717354	212.167	0.832	6.8e-213	1.7e-207
BLCA	ENSR00000145813	chr22:36614946-36620946	APOL1	chr22:36649056-36663576	16.772	0.38	1.7e-17	9.4e-16
BLCA	ENSR00000301799	chr22:36615146-36621146	APOL1	chr22:36649056-36663576	16.996	0.382	1e-17	5.8e-16
BLCA	ENSR00000145812	chr22:36613739-36619739	APOL1	chr22:36649056-36663576	16.636	0.378	2.3e-17	1.3e-15
BLCA	ENSR00000257439	chr1:236650400-236656400	ERO1LB	chr1:236378855-236445319	30.486	0.489	3.3e-31	9.3e-29
BLCA	ENSR00000022371	chr1:236652234-236658234	ERO1LB	chr1:236378855-236445319	24.728	0.449	1.9e-25	2.8e-23
BLCA	ENSR00000022370	chr1:236651272-236657272	ERO1LB	chr1:236378855-236445319	28.838	0.478	1.5e-29	3.5e-27
BLCA	ENSR00000022369	chr1:236650456-236656456	ERO1LB	chr1:236378855-236445319	30.504	0.489	3.1e-31	8.9e-29
BLCA	ENSR00000271728	chr13:41441236-41447236	KBTBD7	chr13:41763969-41768702	20.203	0.412	6.3e-21	5.5e-19
BLCA	ENSR00000022370	chr1:236651272-236657272	LGALS8	chr1:236681300-236716281	19.533	0.406	2.9e-20	2.4e-18
BLCA	ENSR00000022369	chr1:236650456-236656456	LGALS8	chr1:236681300-236716281	20.059	0.411	8.7e-21	7.6e-19
BLCA	ENSR00000022371	chr1:236652234-236658234	LGALS8	chr1:236681300-236716281	17.941	0.391	1.1e-18	7.5e-17
BLCA	ENSR00000257439	chr1:236650400-236656400	LGALS8	chr1:236681300-236716281	20.081	0.411	8.3e-21	7.2e-19
BLCA	ENSR00000136364	chr20:32716518-32722518	NCOA6	chr20:33284722-33413452	12.295	0.329	5.1e-13	1.4e-11
BLCA	ENSR00000298226	chr20:32717006-32723006	NCOA6	chr20:33284722-33413452	12.156	0.327	7e-13	1.9e-11
BLCA	ENSR00000047484	chr12:79173-85173	WNK1	chr12:861759-1020618	12.424	0.331	3.8e-13	1.1e-11
BLCA	ENSR00000305257	chr3:101411844-101417844	RPL24	chr3:101399935-101405626	-17.423	-0.386	3.8e-18	2.3e-16
BLCA	ENSR00000155787	chr3:101411805-101417805	RPL24	chr3:101399935-101405626	-17.457	-0.387	3.5e-18	2.1e-16
BLCA	ENSR00000305257	chr3:101411844-101417844	PCNP	chr3:101292939-101313281	29.663	0.484	2.2e-30	5.7e-28
BLCA	ENSR00000155787	chr3:101411805-101417805	PCNP	chr3:101292939-101313281	29.789	0.484	1.6e-30	4.3e-28
BLCA	ENSR00000011610	chr1:114231890-114237890	PHTF1	chr1:114239453-114302111	22.026	0.428	9.4e-23	1e-20
BLCA	ENSR00000011610	chr1:114231890-114237890	BCAS2	chr1:115110178-115124260	17.248	0.385	5.7e-18	3.4e-16
BLCA	ENSR00000013533	chr1:150604854-150610854	ARNT	chr1:150782181-150849244	18.093	0.393	8.1e-19	5.4e-17
BLCA	ENSR00000164366	chr3:195889571-195895571	DLG1	chr3:196769431-197026171	12.001	0.325	1e-12	2.6e-11
BLCA	5:43048497-43054497	chr5:43048599-43054599	ZNF131	chr5:43065278-43192123	10.584	0.306	2.6e-11	5.4e-10
BLCA	5:37099086-37105086	chr5:37099188-37105188	NUP155	chr5:37288239-37371283	31.493	0.495	3.2e-32	1e-29
BLCA	ENSR00000169560	chr4:77861513-77867513	NUP54	chr4:77035812-77069668	13.264	0.341	5.4e-14	1.8e-12
BLCA	ENSR00000169561	chr4:77862060-77868060	NUP54	chr4:77035812-77069668	14.245	0.352	5.7e-15	2.2e-13
BLCA	ENSR00000218550	chr7:134857999-134863999	MTPN	chr7:135611509-135662101	22.623	0.433	2.4e-23	2.8e-21
BLCA	ENSR00000218551	chr7:134859138-134865138	MTPN	chr7:135611509-135662101	22.78	0.434	1.7e-23	2e-21
BLCA	ENSR00000040210	chr11:60930972-60936972	FEN1	chr11:61560109-61564716	15.796	0.37	1.6e-16	7.7e-15
BLCA	ENSR00000264246	chr11:60931272-60937272	FEN1	chr11:61560109-61564716	15.99	0.372	1e-16	5.1e-15
BLCA	ENSR00000264246	chr11:60931272-60937272	INCENP	chr11:61891445-61920635	12.769	0.335	1.7e-13	5.1e-12
BLCA	ENSR00000040210	chr11:60930972-60936972	INCENP	chr11:61891445-61920635	12.376	0.33	4.2e-13	1.2e-11
BLCA	ENSR00000303848	chr3:46091892-46097892	LIMD1	chr3:45596886-45727830	14.471	0.355	3.4e-15	1.3e-13
BLCA	ENSR00000313719	chr5:1346415-1352415	TRIP13	chr5:892758-919472	15.697	0.369	2e-16	9.5e-15
BLCA	ENSR00000335037	chr9:36678697-36684697	TOMM5	chr9:37582643-37592639	46.84	0.573	1.4e-47	1.8e-44
BLCA	ENSR00000172593	chr4:121949050-121955050	CCNA2	chr4:122737599-122745087	-22.132	-0.429	7.4e-23	8.3e-21
BLCA	ENSR00000329961	chr8:12342509-12348509	LONRF1	chr8:12579403-12613582	16.663	0.379	2.2e-17	1.2e-15
BLCA	ENSR00000329960	chr8:12340009-12346009	LONRF1	chr8:12579403-12613582	14.872	0.36	1.3e-15	5.6e-14
BLCA	ENSR00000221178	chr8:12339705-12345705	LONRF1	chr8:12579403-12613582	14.713	0.358	1.9e-15	7.9e-14
BLCA	ENSR00000329966	chr8:12406909-12412909	LONRF1	chr8:12579403-12613582	30.127	0.487	7.5e-31	2e-28
BLCA	ENSR00000335037	chr9:36678697-36684697	MELK	chr9:36572859-36677678	184.206	0.813	6.2e-185	1.2e-179
BLCA	ENSR00000172593	chr4:121949050-121955050	MAD2L1	chr4:120976763-120988229	-14.666	-0.357	2.2e-15	8.8e-14
BLCA	ENSR00000118753	chr2:71308030-71314030	PAIP2B	chr2:71409869-71454213	177.337	0.808	4.6e-178	7.9e-173
BLCA	ENSR00000324757	chr7:8389430-8395430	COL28A1	chr7:7395834-7575484	14.241	0.352	5.7e-15	2.2e-13
BLCA	ENSR00000118753	chr2:71308030-71314030	MPHOSPH10	chr2:71357444-71377231	30.547	0.489	2.8e-31	8.1e-29
BLCA	ENSR00000177388	chr5:260677-266677	SDHA	chr5:218356-256815	10.932	0.311	1.2e-11	2.6e-10
BLCA	ENSR00000263774	chr11:43879550-43885550	HSD17B12	chr11:43577986-43878167	20.679	0.417	2.1e-21	2e-19
BLCA	ENSR00000263789	chr11:44271550-44277550	HSD17B12	chr11:43577986-43878167	13.072	0.339	8.5e-14	2.7e-12
BLCA	ENSR00000039212	chr11:43885284-43891284	HSD17B12	chr11:43577986-43878167	15.912	0.371	1.2e-16	6e-15
BLCA	ENSR00000227958	chr8:101573429-101579429	ZNF706	chr8:102190106-102218421	10.888	0.31	1.3e-11	2.8e-10
BLCA	ENSR00000332564	chr8:101573328-101579328	ZNF706	chr8:102190106-102218421	10.84	0.31	1.4e-11	3.1e-10
BLCA	ENSR00000332607	chr8:102497328-102503328	ZNF706	chr8:102190106-102218421	18.113	0.393	7.7e-19	5.2e-17
BLCA	ENSR00000228089	chr8:102483529-102489529	ZNF706	chr8:102190106-102218421	17.351	0.386	4.5e-18	2.7e-16
BLCA	ENSR00000227959	chr8:101576722-101582722	ZNF706	chr8:102190106-102218421	10.962	0.311	1.1e-11	2.4e-10
BLCA	ENSR00000263774	chr11:43879550-43885550	EXT2	chr11:44117099-44266979	14.272	0.353	5.4e-15	2e-13
BLCA	ENSR00000263789	chr11:44271550-44277550	EXT2	chr11:44117099-44266979	49.998	0.586	1e-50	1.7e-47
BLCA	ENSR00000227959	chr8:101576722-101582722	ANKRD46	chr8:101521980-101572012	26.854	0.465	1.4e-27	2.7e-25
BLCA	ENSR00000227958	chr8:101573429-101579429	ANKRD46	chr8:101521980-101572012	24.325	0.446	4.7e-25	6.8e-23
BLCA	ENSR00000332607	chr8:102497328-102503328	ANKRD46	chr8:101521980-101572012	16.263	0.375	5.5e-17	2.8e-15
BLCA	ENSR00000332564	chr8:101573328-101579328	ANKRD46	chr8:101521980-101572012	24.272	0.446	5.3e-25	7.7e-23
BLCA	ENSR00000228089	chr8:102483529-102489529	ANKRD46	chr8:101521980-101572012	13.155	0.34	7e-14	2.2e-12
BLCA	ENSR00000079292	chr15:75020419-75026419	CYP1A1	chr15:75011883-75017951	40.396	0.544	4e-41	2.9e-38
BLCA	ENSR00000303848	chr3:46091892-46097892	XCR1	chr3:46058516-46069234	26.323	0.461	4.8e-27	8.6e-25
BLCA	ENSR00000301799	chr22:36615146-36621146	APOL2	chr22:36622256-36636000	20.612	0.416	2.4e-21	2.3e-19
BLCA	ENSR00000145813	chr22:36614946-36620946	APOL2	chr22:36622256-36636000	20.386	0.414	4.1e-21	3.7e-19
BLCA	ENSR00000145812	chr22:36613739-36619739	APOL2	chr22:36622256-36636000	19.97	0.41	1.1e-20	9.2e-19
BLCA	ENSR00000254910	chr1:160957290-160963290	USF1	chr1:161009041-161015767	15.612	0.368	2.4e-16	1.1e-14
BLCA	ENSR00000014617	chr1:160957126-160963126	USF1	chr1:161009041-161015767	15.976	0.372	1.1e-16	5.2e-15
BLCA	ENSR00000017505	chr1:193226678-193232678	CDC73	chr1:193091147-193223031	83.557	0.684	2.8e-84	4.3e-80
BLCA	ENSR00000017506	chr1:193227301-193233301	CDC73	chr1:193091147-193223031	85.77	0.689	1.7e-86	2.9e-82
BLCA	ENSR00000017505	chr1:193226678-193232678	TROVE2	chr1:193028552-193060907	87.277	0.692	5.3e-88	9.8e-84
BLCA	ENSR00000017506	chr1:193227301-193233301	TROVE2	chr1:193028552-193060907	85.33	0.688	4.7e-86	7.9e-82
BLCA	ENSR00000195227	chr6:28384991-28390991	ZKSCAN8	chr6:28109688-28127250	13.074	0.339	8.4e-14	2.7e-12
BLCA	ENSR00000261220	chr10:105622358-105628358	SLK	chr10:105726959-105788991	20.827	0.418	1.5e-21	1.4e-19
BLCA	ENSR00000305257	chr3:101411844-101417844	ABI3BP	chr3:100468000-100712359	15.47	0.366	3.4e-16	1.6e-14
BLCA	ENSR00000155787	chr3:101411805-101417805	ABI3BP	chr3:100468000-100712359	15.586	0.367	2.6e-16	1.2e-14
BLCA	ENSR00000195227	chr6:28384991-28390991	ZSCAN12	chr6:28346732-28367511	30.721	0.49	1.9e-31	5.5e-29
BLCA	ENSR00000130536	chr2:220230820-220236820	PLCD4	chr2:219472488-219501907	11.057	0.313	8.8e-12	2e-10
BLCA	ENSR00000261220	chr10:105622358-105628358	SH3PXD2A	chr10:105348285-105615301	16.417	0.376	3.8e-17	2e-15
BLCA	ENSR00000088030	chr16:75623198-75629198	TMEM170A	chr16:75476952-75499395	61.336	0.626	4.6e-62	1.8e-58
BLCA	ENSR00000020649	chr1:222723430-222729430	TAF1A	chr1:222731244-222763275	15.319	0.364	4.8e-16	2.1e-14
BLCA	ENSR00000169561	chr4:77862060-77868060	CNOT6L	chr4:78634541-78740769	11.27	0.316	5.4e-12	1.2e-10
BLCA	ENSR00000115040	chr2:33138492-33144492	BIRC6	chr2:32582096-32843966	-12.307	-0.329	4.9e-13	1.4e-11
BLCA	ENSR00000014617	chr1:160957126-160963126	KCNJ10	chr1:160007257-160040038	12.118	0.327	7.6e-13	2e-11
BLCA	ENSR00000254910	chr1:160957290-160963290	KCNJ10	chr1:160007257-160040038	12.064	0.326	8.6e-13	2.3e-11
BLCA	ENSR00000014617	chr1:160957126-160963126	DEDD	chr1:161090764-161102478	19.208	0.403	6.2e-20	4.8e-18
BLCA	ENSR00000254910	chr1:160957290-160963290	DEDD	chr1:161090764-161102478	19.103	0.402	7.9e-20	6e-18
BLCA	ENSR00000013533	chr1:150604854-150610854	GABPB2	chr1:151043054-151098018	26.847	0.465	1.4e-27	2.7e-25
BLCA	ENSR00000254910	chr1:160957290-160963290	F11R	chr1:160965001-160991138	76.607	0.668	2.5e-77	2.7e-73
BLCA	ENSR00000014617	chr1:160957126-160963126	F11R	chr1:160965001-160991138	77.616	0.67	2.4e-78	2.8e-74
BLCA	ENSR00000014617	chr1:160957126-160963126	F11R	chr1:160967747-161008752	24.637	0.449	2.3e-25	3.5e-23
BLCA	ENSR00000254910	chr1:160957290-160963290	F11R	chr1:160967747-161008752	25.546	0.455	2.8e-26	4.7e-24
BLCA	ENSR00000267050	chr12:8434796-8440796	A2ML1	chr12:8975068-9039597	12.616	0.333	2.4e-13	7.1e-12
BLCA	ENSR00000013533	chr1:150604854-150610854	SETDB1	chr1:150898739-150937213	37.136	0.527	7.3e-38	4e-35
BLCA	ENSR00000010575	chr1:100166956-100172956	DBT	chr1:100652475-100715390	13.682	0.346	2.1e-14	7.2e-13
BLCA	ENSR00000014617	chr1:160957126-160963126	B4GALT3	chr1:161141100-161147287	18.763	0.399	1.7e-19	1.3e-17
BLCA	ENSR00000254910	chr1:160957290-160963290	B4GALT3	chr1:161141100-161147287	18.611	0.398	2.5e-19	1.8e-17
BLCA	ENSR00000254910	chr1:160957290-160963290	NDUFS2	chr1:161166894-161184185	12.106	0.327	7.8e-13	2.1e-11
BLCA	ENSR00000014617	chr1:160957126-160963126	NDUFS2	chr1:161166894-161184185	12.267	0.329	5.4e-13	1.5e-11
BLCA	ENSR00000014617	chr1:160957126-160963126	NIT1	chr1:161087876-161095235	10.259	0.301	5.5e-11	1.1e-09
BLCA	ENSR00000254910	chr1:160957290-160963290	DCAF8	chr1:160185505-160254920	10.943	0.311	1.1e-11	2.5e-10
BLCA	ENSR00000014617	chr1:160957126-160963126	DCAF8	chr1:160185505-160254920	11.013	0.312	9.7e-12	2.2e-10
BLCA	ENSR00000014617	chr1:160957126-160963126	NCSTN	chr1:160313062-160328742	10.25	0.301	5.6e-11	1.1e-09
BLCA	ENSR00000254910	chr1:160957290-160963290	NCSTN	chr1:160313062-160328742	10.315	0.302	4.8e-11	9.5e-10
BLCA	ENSR00000305257	chr3:101411844-101417844	ZBTB11	chr3:101367733-101396339	48.756	0.581	1.8e-49	2.6e-46
BLCA	ENSR00000155787	chr3:101411805-101417805	ZBTB11	chr3:101367733-101396339	48.27	0.579	5.4e-49	7.6e-46
BLCA	ENSR00000111372	chr19:53963703-53969703	ZNF765	chr19:53893046-53930574	11.985	0.325	1e-12	2.7e-11
BLCA	ENSR00000239941	chr9:114965190-114971190	PTBP3	chr9:114980715-115095947	71.791	0.656	1.6e-72	1.3e-68
BLCA	ENSR00000239940	chr9:114963051-114969051	PTBP3	chr9:114980715-115095947	44.395	0.562	4e-45	4.2e-42
BLCA	ENSR00000014617	chr1:160957126-160963126	ARHGAP30	chr1:161016736-161039760	15.898	0.371	1.3e-16	6.2e-15
BLCA	ENSR00000254910	chr1:160957290-160963290	ARHGAP30	chr1:161016736-161039760	16.176	0.374	6.7e-17	3.4e-15
BLCA	ENSR00000239941	chr9:114965190-114971190	SNX30	chr9:115513118-115643951	24.263	0.446	5.5e-25	7.8e-23
BLCA	ENSR00000254910	chr1:160957290-160963290	NR1I3	chr1:161199456-161208092	22.82	0.434	1.5e-23	1.8e-21
BLCA	ENSR00000014617	chr1:160957126-160963126	NR1I3	chr1:161199456-161208092	22.439	0.431	3.6e-23	4.2e-21
BLCA	ENSR00000014617	chr1:160957126-160963126	UFC1	chr1:161122566-161128646	15.841	0.37	1.4e-16	7e-15
BLCA	ENSR00000254910	chr1:160957290-160963290	UFC1	chr1:161122566-161128646	15.495	0.366	3.2e-16	1.5e-14
BLCA	ENSR00000014617	chr1:160957126-160963126	PEX19	chr1:160246602-160256138	10.443	0.304	3.6e-11	7.2e-10
BLCA	ENSR00000254910	chr1:160957290-160963290	PEX19	chr1:160246602-160256138	10.611	0.306	2.5e-11	5.1e-10
BLCA	ENSR00000005553	chr1:43600563-43606563	PTPRF	chr1:43990858-44089343	11.223	0.315	6e-12	1.4e-10
BLCA	ENSR00000251495	chr1:43602971-43608971	PTPRF	chr1:43990858-44089343	11.533	0.319	2.9e-12	7.1e-11
BLCA	ENSR00000014617	chr1:160957126-160963126	USP21	chr1:161129240-161135513	19.82	0.409	1.5e-20	1.3e-18
BLCA	ENSR00000254910	chr1:160957290-160963290	USP21	chr1:161129240-161135513	19.518	0.406	3e-20	2.4e-18
BLCA	ENSR00000014617	chr1:160957126-160963126	SDHC	chr1:161284047-161332984	15.538	0.367	2.9e-16	1.3e-14
BLCA	ENSR00000254910	chr1:160957290-160963290	SDHC	chr1:161284047-161332984	15.861	0.37	1.4e-16	6.7e-15
BLCA	ENSR00000111372	chr19:53963703-53969703	ZNF701	chr19:53059075-53090427	14.073	0.351	8.4e-15	3.1e-13
BLCA	ENSR00000195227	chr6:28384991-28390991	ZSCAN23	chr6:28399707-28411279	161.534	0.795	2.9e-162	4.2e-157
BLCA	ENSR00000195227	chr6:28384991-28390991	SCAND3	chr6:28539407-28583989	27.599	0.47	2.5e-28	5.3e-26
BLCA	ENSR00000195227	chr6:28384991-28390991	ZKSCAN4	chr6:28212401-28227011	11.053	0.313	8.9e-12	2e-10
BLCA	ENSR00000328997	chr7:149235891-149241891	ZNF212	chr7:148936742-148952700	10.592	0.306	2.6e-11	5.3e-10
BLCA	ENSR00000088030	chr16:75623198-75629198	GABARAPL2	chr16:75600249-75611779	30.808	0.491	1.6e-31	4.6e-29
BLCA	ENSR00000013533	chr1:150604854-150610854	POGZ	chr1:151375200-151431941	41.946	0.551	1.1e-42	9.5e-40
BLCA	ENSR00000004207	chr1:32026301-32032301	MARCKSL1	chr1:32799433-32801980	11.978	0.325	1.1e-12	2.8e-11
BLCA	ENSR00000251064	chr1:32026801-32032801	MARCKSL1	chr1:32799433-32801980	12.214	0.328	6.1e-13	1.7e-11
BLCA	ENSR00000088030	chr16:75623198-75629198	KARS	chr16:75661622-75682541	14.145	0.351	7.2e-15	2.7e-13
BLCA	ENSR00000088030	chr16:75623198-75629198	CFDP1	chr16:75327596-75467383	19.154	0.403	7e-20	5.4e-18
BLCA	ENSR00000136364	chr20:32716518-32722518	CBFA2T2	chr20:32077881-32237842	11.644	0.321	2.3e-12	5.6e-11
BLCA	ENSR00000298226	chr20:32717006-32723006	CBFA2T2	chr20:32077881-32237842	11.986	0.325	1e-12	2.7e-11
BLCA	ENSR00000088030	chr16:75623198-75629198	WDR59	chr16:74907468-75034071	42.537	0.554	2.9e-43	2.6e-40
BLCA	ENSR00000088030	chr16:75623198-75629198	ZFP1	chr16:75182390-75206134	38.795	0.536	1.6e-39	1e-36
BLCA	ENSR00000088030	chr16:75623198-75629198	RFWD3	chr16:74655292-74700779	31.421	0.495	3.8e-32	1.2e-29
BLCA	ENSR00000177388	chr5:260677-266677	PDCD6	chr5:271736-353971	17.462	0.387	3.5e-18	2.1e-16
BLCA	ENSR00000271728	chr13:41441236-41447236	MTRF1	chr13:41790505-41837742	59.691	0.62	2e-60	7e-57
BLCA	ENSR00000111372	chr19:53963703-53969703	ZNF347	chr19:53627325-53662328	11.667	0.321	2.2e-12	5.4e-11
BLCA	ENSR00000013533	chr1:150604854-150610854	VPS45	chr1:150039369-150117505	26.26	0.46	5.5e-27	9.9e-25
BLCA	ENSR00000088030	chr16:75623198-75629198	ADAT1	chr16:75630879-75657198	51.306	0.591	4.9e-52	9e-49
BLCA	ENSR00000047484	chr12:79173-85173	RAD52	chr12:1021243-1099219	16.159	0.373	6.9e-17	3.5e-15
BLCA	ENSR00000177388	chr5:260677-266677	SLC12A7	chr5:1050499-1112150	15.72	0.369	1.9e-16	9.1e-15
BLCA	5:1562421-1568421	chr5:1562536-1568536	SLC12A7	chr5:1050499-1112150	11.662	0.321	2.2e-12	5.4e-11
BLCA	ENSR00000088030	chr16:75623198-75629198	CHST5	chr16:75562433-75569145	13.525	0.344	3e-14	1e-12
BLCA	ENSR00000088030	chr16:75623198-75629198	ZNRF1	chr16:75032928-75144892	27.464	0.469	3.4e-28	7.1e-26
BLCA	8:143028397-143034397	chr8:144109814-144115814	ZNF707	chr8:144766622-144796068	16.137	0.373	7.3e-17	3.7e-15
BLCA	ENSR00000333924	chr8:144107817-144113817	ZNF707	chr8:144766622-144796068	16.788	0.38	1.6e-17	9.1e-16
BLCA	ENSR00000232019	chr8:144107858-144113858	ZNF707	chr8:144766622-144796068	16.809	0.38	1.6e-17	8.7e-16
BLCA	ENSR00000088030	chr16:75623198-75629198	TMEM231	chr16:75572015-75590184	18.906	0.401	1.2e-19	9.2e-18
BLCA	ENSR00000177388	chr5:260677-266677	BRD9	chr5:850406-892939	25.435	0.454	3.7e-26	6e-24
BLCA	ENSR00000313719	chr5:1346415-1352415	BRD9	chr5:850406-892939	23.883	0.443	1.3e-24	1.8e-22
BLCA	5:1562421-1568421	chr5:1562536-1568536	BRD9	chr5:850406-892939	13.644	0.345	2.3e-14	7.9e-13
BLCA	ENSR00000039212	chr11:43885284-43891284	API5	chr11:43333513-43366079	21.11	0.42	7.8e-22	7.7e-20
BLCA	ENSR00000263789	chr11:44271550-44277550	API5	chr11:43333513-43366079	18.394	0.396	4e-19	2.8e-17
BLCA	ENSR00000263774	chr11:43879550-43885550	API5	chr11:43333513-43366079	42.206	0.552	6.2e-43	5.3e-40
BLCA	ENSR00000218550	chr7:134857999-134863999	NUP205	chr7:135242667-135333505	18.369	0.396	4.3e-19	3e-17
BLCA	ENSR00000218551	chr7:134859138-134865138	NUP205	chr7:135242667-135333505	17.597	0.388	2.5e-18	1.6e-16
BLCA	ENSR00000148646	chr3:12497599-12503599	TAMM41	chr3:11831916-11888393	19.956	0.41	1.1e-20	9.5e-19
BLCA	ENSR00000148645	chr3:12493043-12499043	TAMM41	chr3:11831916-11888393	19.356	0.405	4.4e-20	3.5e-18
BLCA	ENSR00000239941	chr9:114965190-114971190	FKBP15	chr9:115923286-115983641	24.188	0.445	6.5e-25	9.2e-23
BLCA	ENSR00000160285	chr3:151504967-151510967	IGSF10	chr3:151143172-151176497	13.363	0.342	4.3e-14	1.4e-12
BLCA	ENSR00000160286	chr3:151507286-151513286	IGSF10	chr3:151143172-151176497	11.166	0.314	6.8e-12	1.6e-10
BLCA	ENSR00000160285	chr3:151504967-151510967	AADAC	chr3:151531825-151546276	40.863	0.546	1.4e-41	1e-38
BLCA	ENSR00000160286	chr3:151507286-151513286	AADAC	chr3:151531825-151546276	39.34	0.538	4.6e-40	3e-37
BLCA	ENSR00000047484	chr12:79173-85173	KDM5A	chr12:389295-498620	14.1	0.351	7.9e-15	3e-13
BLCA	ENSR00000263612	chr11:36501150-36507150	TRAF6	chr11:36508577-36531822	35.004	0.516	9.9e-36	4.4e-33
BLCA	ENSR00000298226	chr20:32717006-32723006	MYH7B	chr20:33563206-33590240	13.821	0.348	1.5e-14	5.4e-13
BLCA	ENSR00000136364	chr20:32716518-32722518	MYH7B	chr20:33563206-33590240	13.225	0.34	6e-14	1.9e-12
BLCA	ENSR00000239941	chr9:114965190-114971190	INIP	chr9:115446206-115480516	22.211	0.429	6.1e-23	6.9e-21
BLCA	ENSR00000013533	chr1:150604854-150610854	PRUNE	chr1:150980896-151008189	17.098	0.383	8e-18	4.6e-16
BLCA	ENSR00000218551	chr7:134859138-134865138	CNOT4	chr7:135046547-135194875	28.526	0.476	3e-29	6.9e-27
BLCA	ENSR00000218550	chr7:134857999-134863999	CNOT4	chr7:135046547-135194875	28.366	0.475	4.3e-29	9.8e-27
BLCA	ENSR00000239941	chr9:114965190-114971190	KIAA1958	chr9:115249127-115431677	12.7	0.334	2e-13	5.9e-12
BLCA	ENSR00000010575	chr1:100166956-100172956	FRRS1	chr1:100174259-100232187	98.427	0.714	3.7e-99	1.3e-94
BLCA	1:168559308-168565308	chr1:168528546-168534546	SFT2D2	chr1:168195176-168222263	13.116	0.339	7.7e-14	2.4e-12
BLCA	ENSR00000335037	chr9:36678697-36684697	ZBTB5	chr9:37438111-37465396	15.566	0.367	2.7e-16	1.3e-14
BLCA	ENSR00000218550	chr7:134857999-134863999	AGBL3	chr7:134671259-134832715	14.872	0.36	1.3e-15	5.6e-14
BLCA	ENSR00000218551	chr7:134859138-134865138	AGBL3	chr7:134671259-134832715	17.175	0.384	6.7e-18	3.9e-16
BLCA	ENSR00000328997	chr7:149235891-149241891	ZNF783	chr7:148959262-148994393	18.177	0.394	6.7e-19	4.5e-17
[truncated: 24,714 more rows]

## Sheet: Table S10
Table S10 Correlations between eRNAs and immune infiltration in 30 cancers from TCGA
[truncated: 2,809 more rows]

[truncated: 9 more sheets: Table S11, Table S12, Table S13, Table S14, Table S15, Table S16, Table S17, Table S18, Table S19]
